# Supplementary material for: Photoredox aerobic oxidation of unreactive amine derivatives through LMCT excitation of copper dichloride
Source: Royal Society of Chemistry journal article supplement (doi:10.1039/d2qo01032a), 2022-01-01

# Photoredox Aerobic Oxidation of Unreactive Amines Derivatives through LMCT Excitation of Copper Dichloride

Pengcheng Lian, Ruyi Li, Lili Wang, Xiao Wan, Zixin Xiang, and Xiaobing Wan\*

*Key Laboratory of Organic Synthesis of Jiangsu Province, College of Chemistry, Chemical Engineering and*

*Materials Science, Soochow University, Suzhou 215123, P. R. China*

Email: [wanxb@suda.edu.cn](mailto:wanxb@suda.edu.cn)

## Table of Contents

|                                                                           |           |
|---------------------------------------------------------------------------|-----------|
| <b>General information.....</b>                                           | <b>S2</b> |
| <b>General procedures for reactions.....</b>                              | <b>S2</b> |
| <b>Table S1. Optimization for oxidation of secondary amides.....</b>      | <b>S4</b> |
| <b>Table S2. Optimization for N-demethylation of tertiary amides.....</b> | <b>S5</b> |
| <b>Spectral data for products.....</b>                                    | <b>S6</b> |

## General information

Column chromatography was generally performed on silica gel (300-400 mesh) and reactions were monitored by thin layer chromatography (TLC) using UV light to visualize the course of the reactions. The  $^1\text{H}$  NMR (400 MHz) and  $^{13}\text{C}$  NMR (100 MHz) and  $^{19}\text{F}$  NMR (377 MHz) data were recorded with  $\text{CDCl}_3$  or  $\text{DMSO-}d_6$  as solvent at room temperature unless specified otherwise. The chemical shifts ( $\delta$ ) are reported in ppm and coupling constants ( $J$ ) in Hz.  $^1\text{H}$  NMR spectra was recorded with tetramethylsilane ( $\delta = 0.00$  ppm) as internal reference;  $^{13}\text{C}$  NMR spectra was recorded with  $\text{CDCl}_3$  ( $\delta = 77.00$  ppm) or  $\text{DMSO-}d_6$  ( $\delta = 39.50$  ppm) as internal reference. IR and HRMS were performed by the State-authorized Analytical Center in Soochow University.

## General procedures

### C–H oxidation of tertiary amides

To a 25 mL Schlenk tube, tertiary amides (0.2 mmol), copper dichloride (0.01 mmol),  $\text{H}_2\text{O}$  (2.0 mmol) and  $\text{NH}_4\text{Cl}$  (0.04 mmol) were dissolved in  $\text{MeNO}_2$  (2.0 mL). Under the irradiation of 38 W white LEDs, the reaction mixture was stirred at room temperature under oxygen atmosphere for 72 h. After the reaction, the system is quenched with sodium thiosulfate, then poured in brine solution (15 mL) and extracted with ethyl acetate (3 x 20 mL) and then dried over  $\text{MgSO}_4$ . The solvent was removed under reduced pressure and the residue was purified by silica gel column chromatography (ethyl acetate/ petroleum ether ether) to afford desired products.

### C–H oxidation of secondary amides

To a 25 mL Schlenk tube, secondary amides (0.2 mmol), copper dichloride (0.005 mmol) and  $\text{NH}_4\text{Cl}$  (0.02 mmol) were dissolved in  $\text{MeNO}_2$  (2.0 mL). Under the irradiation of 38 W white LEDs, the reaction mixture was stirred at room temperature under oxygen atmosphere for 72 h. After the reaction, the reaction system is quenched with sodium thiosulfate, then poured in brine solution (15 mL) and extracted with ethyl acetate (3 x 20 mL) and then dried over  $\text{MgSO}_4$ . The solvent was removed under reduced pressure

and the residue was purified by silica gel column chromatography (ethyl acetate/petroleum ether ether) to afford desired products.

#### ***N*-Demethylation of tertiary amides**

To a 25 mL Schlenk tube, amides (0.2 mmol), copper dichloride (0.01 mmol) and HCl (0.4 mmol, 37% in water) were dissolved in acetone (0.5 mL). Under the irradiation of 38 W white LEDs, the reaction mixture was stirred at room temperature under oxygen atmosphere for 72 h. After the reaction, the reaction system is quenched with sodium thiosulfate, then poured in brine solution (15 mL) and extracted with ethyl acetate (3 x 20 mL) and then dried over MgSO<sub>4</sub>. The solvent was removed under reduced pressure and the residue was purified by silica gel column chromatography (ethyl acetate/petroleum ether ether) to afford desired products.

**Table S1.** Optimization for oxidation of secondary amides<sup>a</sup>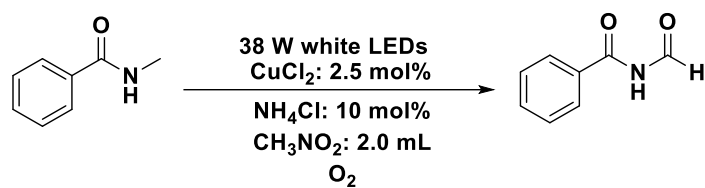

| Entry | Variation from the "standard conditions" Catalyst             | Yield (%) <sup>b</sup> |
|-------|---------------------------------------------------------------|------------------------|
| 1     | none                                                          | 94                     |
| 2     | In the dark                                                   | N.D.                   |
| 3     | Et <sub>3</sub> N instead of CH <sub>3</sub> NO <sub>2</sub>  | N.D.                   |
| 4     | Benzene instead of CH <sub>3</sub> NO <sub>2</sub>            | N.D.                   |
| 5     | MeCN instead of CH <sub>3</sub> NO <sub>2</sub>               | 62                     |
| 6     | EA instead of CH <sub>3</sub> NO <sub>2</sub>                 | 15                     |
| 7     | DCM instead of CH <sub>3</sub> NO <sub>2</sub>                | 23                     |
| 8     | DMF instead of CH <sub>3</sub> NO <sub>2</sub>                | N.D.                   |
| 9     | DMSO- <i>d</i> 6 instead of CH <sub>3</sub> NO <sub>2</sub>   | N.D.                   |
| 10    | CH <sub>3</sub> OH instead of CH <sub>3</sub> NO <sub>2</sub> | N.D.                   |
| 11    | THF instead of CH <sub>3</sub> NO <sub>2</sub>                | N.D.                   |
| 12    | 1,4-Dioxane instead of Acetone                                | N.D.                   |
| 13    | Acetone instead of Acetone                                    | 33                     |
| 14    | air instead of O <sub>2</sub>                                 | 44                     |
| 15    | N <sub>2</sub> instead of O <sub>2</sub>                      | N.D.                   |

<sup>a</sup> Reaction conditions: amide (0.2 mmol), NH<sub>4</sub>Cl (0.02 mmol, 10 mol%), CuCl<sub>2</sub> (0.005 mmol) in solvent (2.0 mL) irradiation with 38 W white light LEDs at ambient temperature for 72 h. <sup>b</sup> Isolated yields after column chromatography.

**Table S2.** Optimization for *N*-demethylation of tertiary amides<sup>a</sup>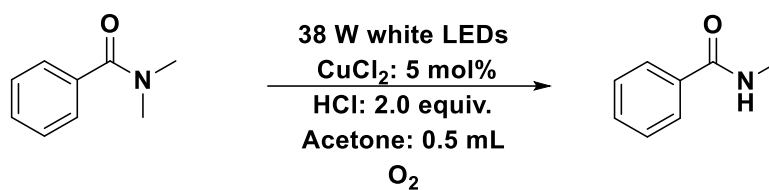

| Entry | Variation from the "standard conditions" Catalyst   | Yield (%) <sup>b</sup> |
|-------|-----------------------------------------------------|------------------------|
| 1     | none                                                | 90                     |
| 2     | In the dark                                         | N.D.                   |
| 3     | MeCN instead of Acetone                             | 49                     |
| 4     | Benzene instead of Acetone                          | 57                     |
| 5     | EA instead of Acetone                               | 41                     |
| 6     | CH <sub>3</sub> NO <sub>2</sub> instead of Acetone  | 55                     |
| 7     | DMF instead of Acetone                              | < 5                    |
| 8     | DMSO- <i>d</i> <sub>6</sub> instead of Acetone      | < 5                    |
| 9     | CH <sub>3</sub> OH instead of Acetone               | 52                     |
| 10    | C <sub>2</sub> H <sub>5</sub> OH instead of Acetone | 26                     |
| 11    | THF instead of Acetone                              | 49                     |
| 12    | 1,4-Dioxane instead of Acetone                      | 39                     |
| 13    | 2-Butanone instead of Acetone                       | 62                     |
| 14    | air instead of O <sub>2</sub>                       | 80                     |
| 15    | N <sub>2</sub> instead of O <sub>2</sub>            | N.D.                   |
| 16    | NaCl instead of HCl                                 | trace                  |
| 17    | LiCl instead of HCl                                 | 10                     |
| 18    | NH <sub>4</sub> Cl instead of HCl                   | trace                  |
| 19    | Me <sub>4</sub> NCl instead of HCl                  | N.D.                   |
| 20    | MnCl <sub>2</sub> instead of CuCl <sub>2</sub>      | N.D.                   |
| 21    | CoCl <sub>2</sub> instead of CuCl <sub>2</sub>      | 37                     |

<sup>a</sup> Reaction conditions: amide (0.2 mmol), HCl (0.4 mmol, 2.0 equiv, 37% in water), CuCl<sub>2</sub> (0.01 mmol) in solvent (0.5 mL) irradiation with 38 W white light LEDs at ambient temperature for 72 h. <sup>b</sup> Isolated yields after column chromatography.

## Spectral Data for Products

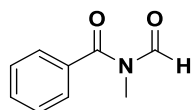

### *N*-Formyl-*N*-Methylbenzamide (2a)

petroleum ether / ethyl acetate = 5:1, white solid, 83% yield (27.1 mg). mp: 43 – 45°C.  $^1\text{H NMR}$  (400 MHz,  $\text{CDCl}_3$ )  $\delta$  8.98 (s, 1H), 7.59 – 7.47 (m, 5H), 3.26 (s, 3H).  $^{13}\text{C NMR}$  (100 MHz,  $\text{CDCl}_3$ )  $\delta$  172.32, 164.18, 133.25, 131.95, 128.73, 128.64, 27.27. **HRMS** (ESI-TOF): Anal Calcd. For.  $\text{C}_9\text{H}_9\text{NO}_2+\text{Na}^+$ : 186.0525, Found: 186.0525. **IR** (neat,  $\text{cm}^{-1}$ ):  $\nu$  3049, 2956, 1717, 1652, 1529, 1340, 800, 729.

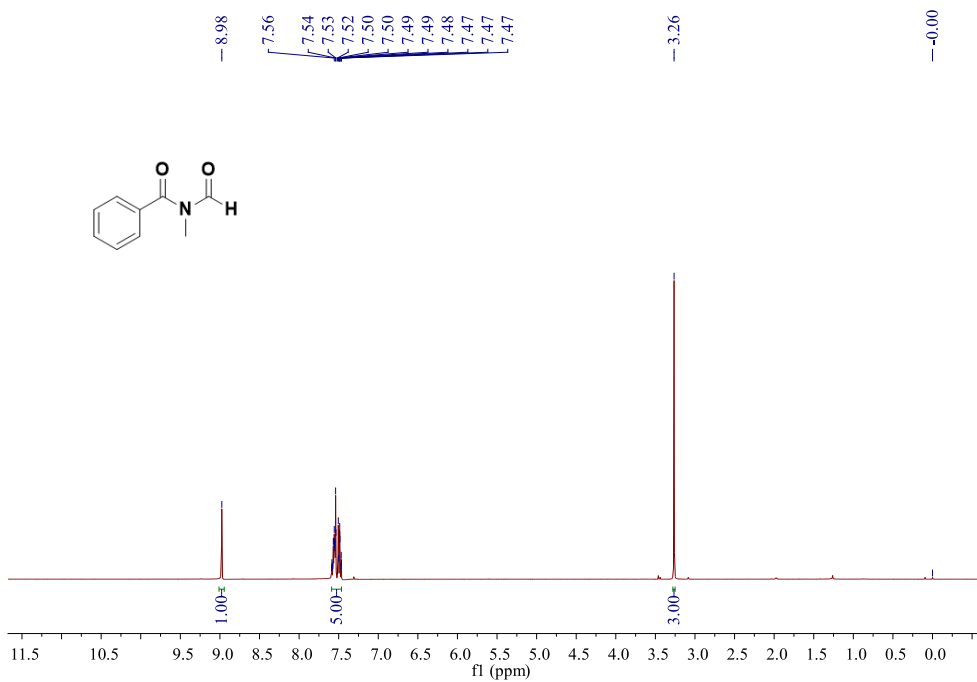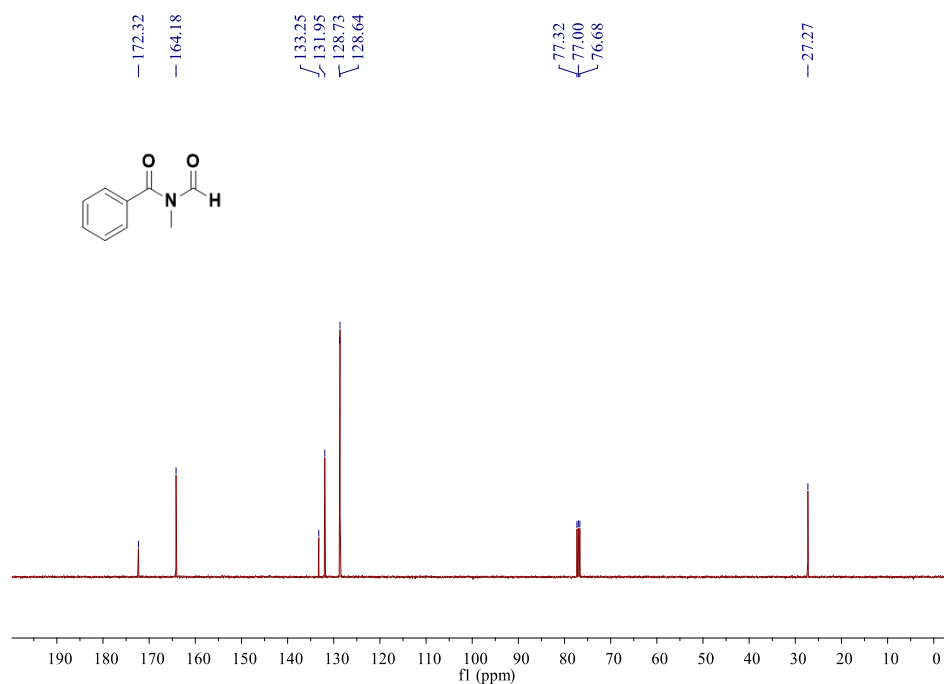

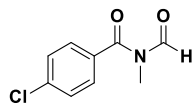

#### 4-Chloro-*N*-formyl-*N*-Methylbenzamide (2b)

petroleum ether / ethyl acetate = 5:1, white solid, 68% yield (26.8 mg). mp: 178 – 180°C. <sup>1</sup>H NMR (400 MHz, DMSO-*d*<sub>6</sub>) δ 8.84 (s, 1H), 7.66 (d, *J* = 8.6 Hz, 2H), 7.59 (d, *J* = 8.6 Hz, 2H), 3.10 (s, 3H). <sup>13</sup>C NMR (100 MHz, DMSO-*d*<sub>6</sub>) δ 171.31, 164.51, 136.54, 132.46, 130.79, 128.79, 27.11. HRMS (ESI-TOF): Anal Calcd. For. C<sub>9</sub>H<sub>8</sub><sup>35</sup>ClNO<sub>2</sub>+Na<sup>+</sup>: 220.0136, Found: 220.0133. Anal Calcd. For. C<sub>9</sub>H<sub>8</sub><sup>37</sup>ClNO<sub>2</sub>+Na<sup>+</sup>: 222.0106, Found: 222.0105. IR (neat, cm<sup>-1</sup>): ν 3089, 2960, 1713, 1656, 1589, 1406, 1338, 917, 841.

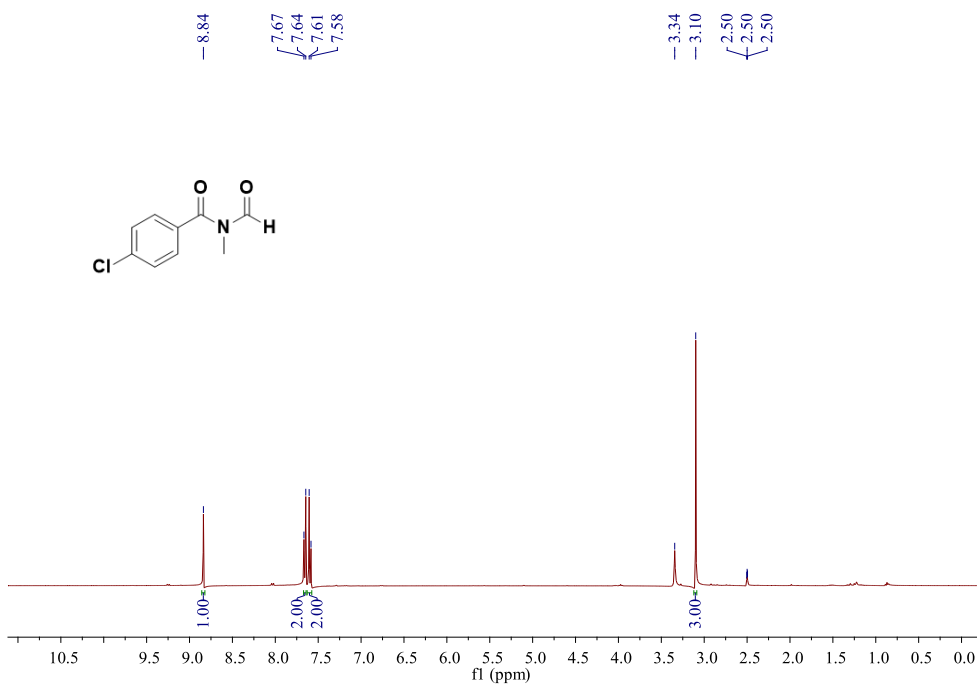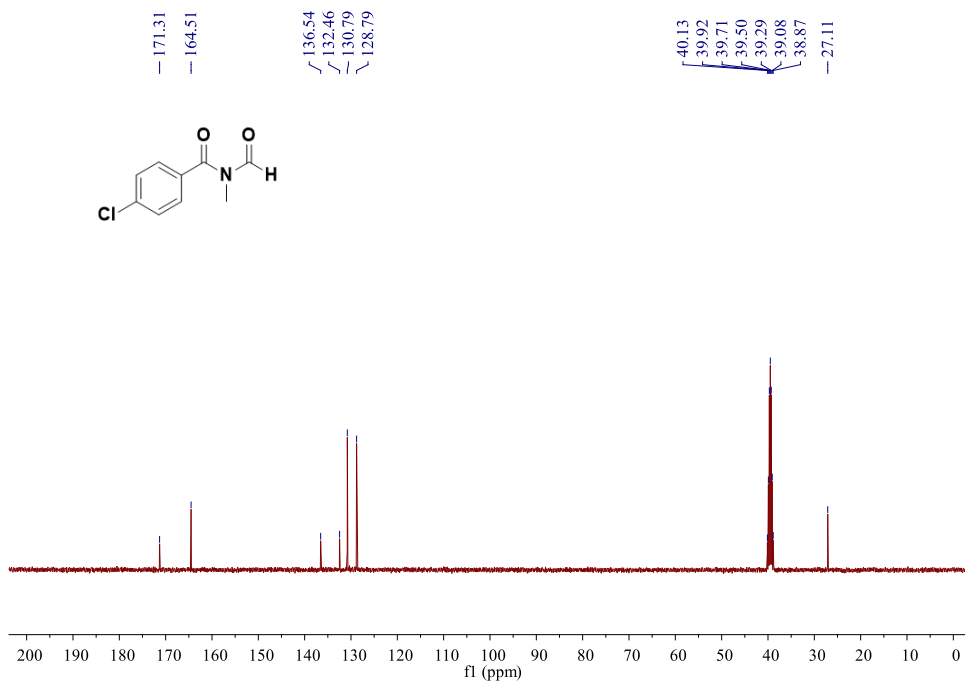

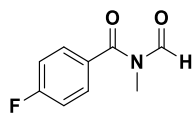

#### 4-Fluoro-*N*-Formyl-*N*-Methylbenzamide (2c)

petroleum ether / ethyl acetate = 5:1, white solid, 58% yield (21.0 mg). mp: 69 – 71 °C.  $^1\text{H NMR}$  (400 MHz, DMSO-*d*<sub>6</sub>)  $\delta$  8.85 (s, 1H), 7.73 – 7.70 (m, 2H), 7.39 – 7.34 (m, 2H), 3.10 (s, 3H).  $^{13}\text{C NMR}$  (100 MHz, DMSO-*d*<sub>6</sub>)  $\delta$  171.27, 164.54, 163.9 (d,  $J = 249.0$  Hz), 131.74 (d,  $J = 9.2$  Hz), 130.17 (d,  $J = 3.0$  Hz), 115.79 (d,  $J = 22.0$  Hz), 27.17.  $^{19}\text{F NMR}$  (377 MHz, DMSO-*d*<sub>6</sub>)  $\delta$  -107.75 (s, 1F). **HRMS** (ESI-TOF): Anal Calcd. For. C<sub>9</sub>H<sub>8</sub>FN<sub>2</sub>O<sub>2</sub>+Na<sup>+</sup>: 204.0431, Found: 204.0430. **IR** (neat, cm<sup>-1</sup>):  $\nu$  3074, 2941, 1720, 1655, 1508, 1473, 1339, 823, 785.

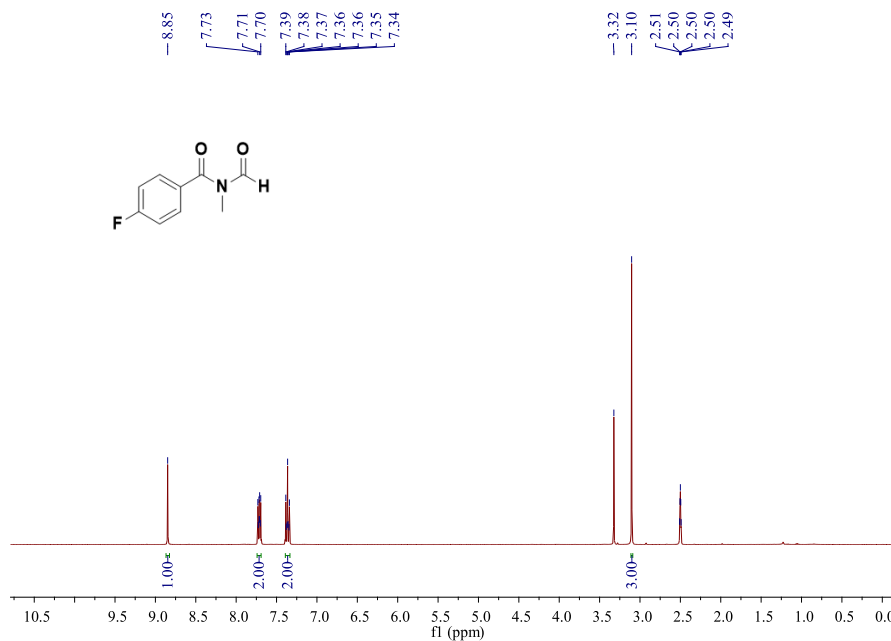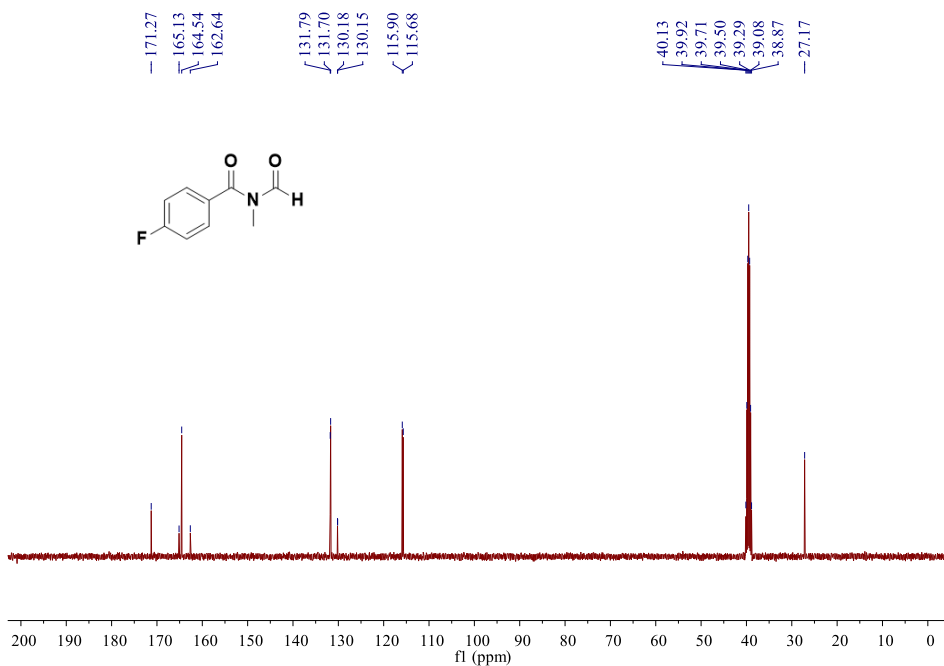



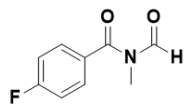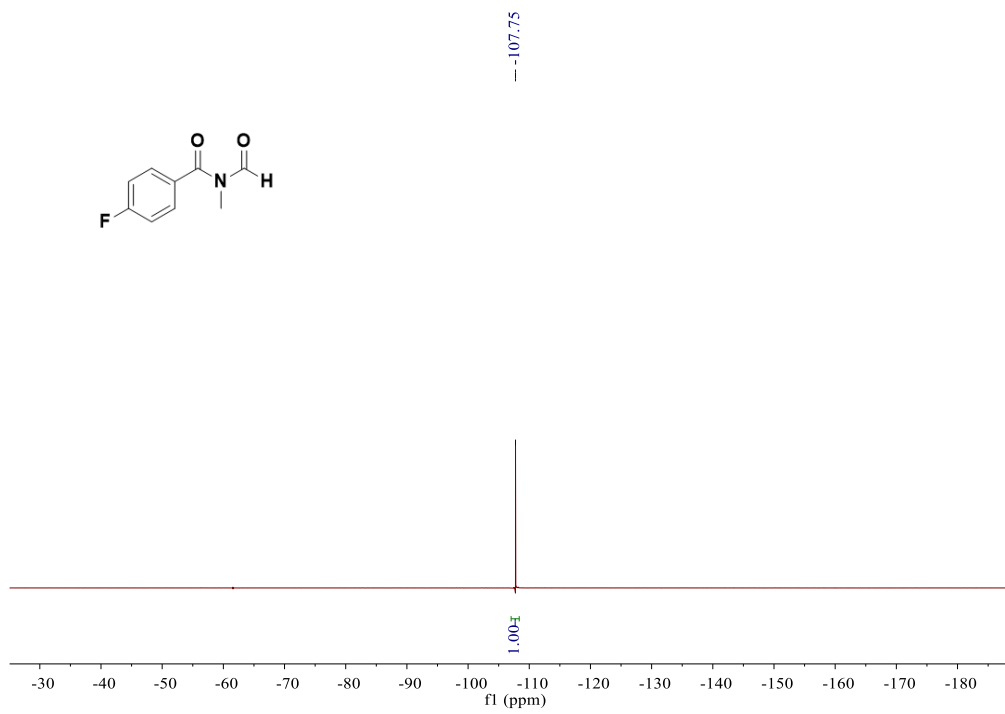

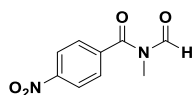

***N*-Formyl-*N*-Methyl-4-Nitrobenzamide (2d)**

petroleum ether / ethyl acetate = 5:1, white solid, 65% yield (27.0 mg). mp: 122 – 124°C. <sup>1</sup>H NMR (400 MHz, DMSO-*d*<sub>6</sub>) δ 8.79 (s, 1H), 8.34 (d, *J* = 8.8 Hz, 2H), 7.89 (d, *J* = 8.8 Hz, 2H), 3.12 (s, 3H). <sup>13</sup>C NMR (100 MHz, DMSO-*d*<sub>6</sub>) δ 170.87, 164.47, 148.91, 139.61, 130.09, 123.81, 26.95. HRMS (EI-TOF): Anal Calcd. For. C<sub>9</sub>H<sub>8</sub>N<sub>2</sub>O<sub>4</sub>: 208.0484, Found: 208.0479. IR (neat, cm<sup>-1</sup>): ν 2984, 2877, 1736, 1673, 1530, 1480, 1372, 847.

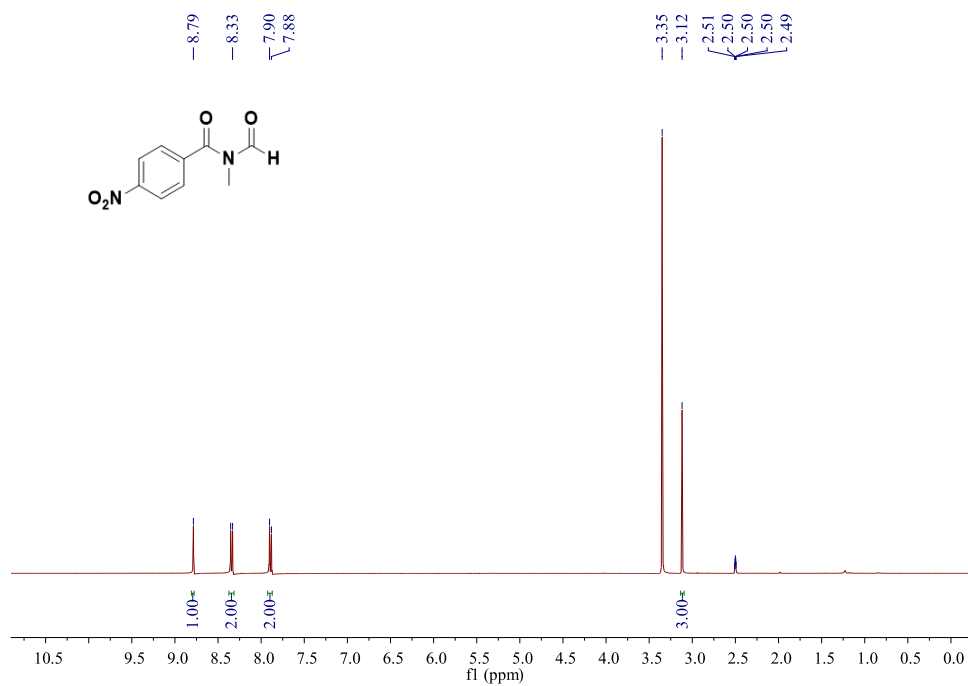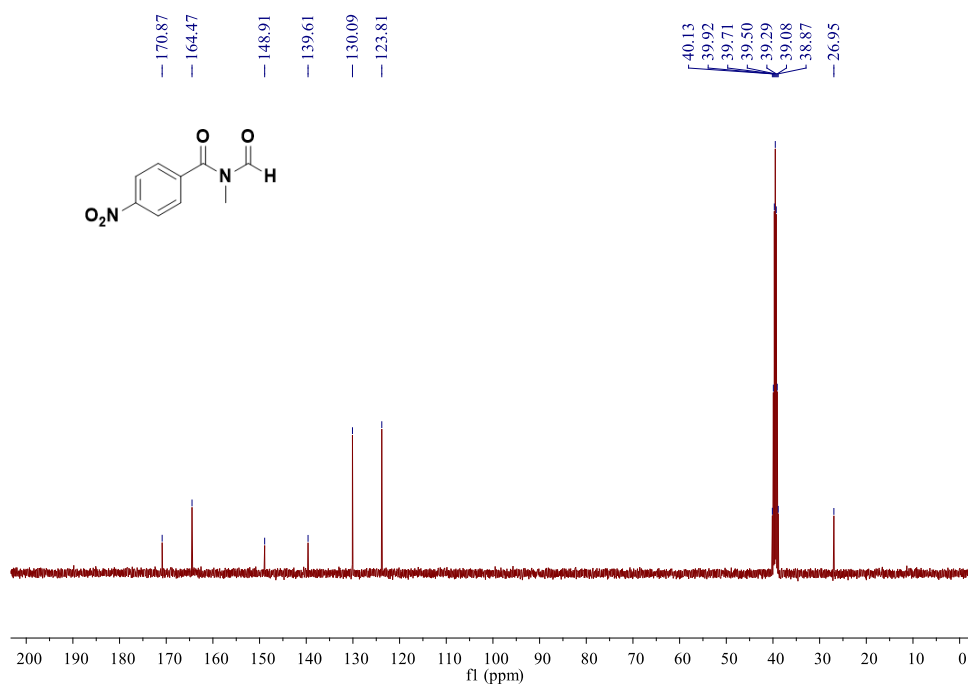

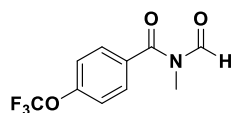

***N*-Formyl-*N*-Methyl-4-(trifluoromethoxy)benzamide (2e)**

petroleum ether / ethyl acetate = 5:1, yellow solid, 63% yield (31.1 mg). mp: 99 – 100°C. <sup>1</sup>H NMR (400 MHz, DMSO-*d*<sub>6</sub>) δ 8.85 (s, 1H), 7.79 – 7.76 (m, 2H), 7.52 – 7.50 (m, 2H), 3.11 (s, 3H). <sup>13</sup>C NMR (100 MHz, DMSO-*d*<sub>6</sub>) δ 171.13, 164.52, 150.36, 132.78, 131.30, 120.93, 119.94 (q, *J* = 256.0 Hz), 27.08. <sup>19</sup>F NMR (377 MHz, DMSO-*d*<sub>6</sub>) δ -56.72 (s, 3F). HRMS (ESI-TOF): Anal Calcd. For. C<sub>10</sub>H<sub>8</sub>F<sub>3</sub>NO<sub>3</sub>+Na<sup>+</sup>: 270.0348, Found: 270.0346. IR (neat, cm<sup>-1</sup>): ν 3055, 2937, 1716, 1646, 1571, 1448, 1399, 1245, 864, 792.

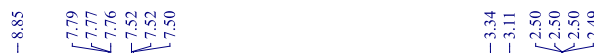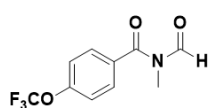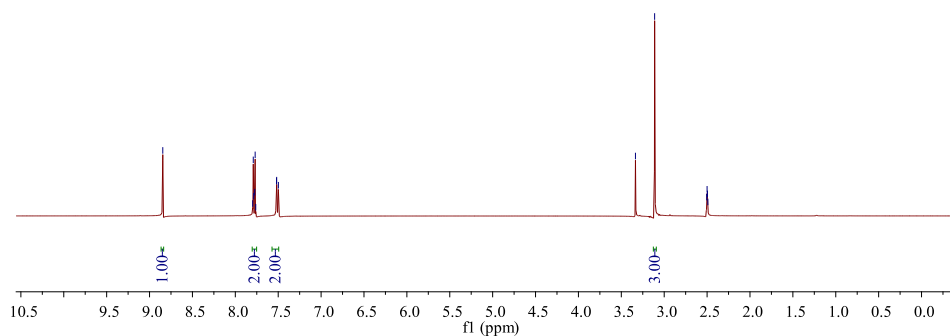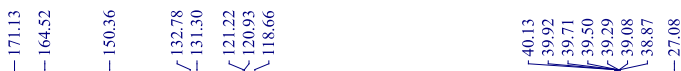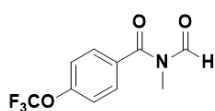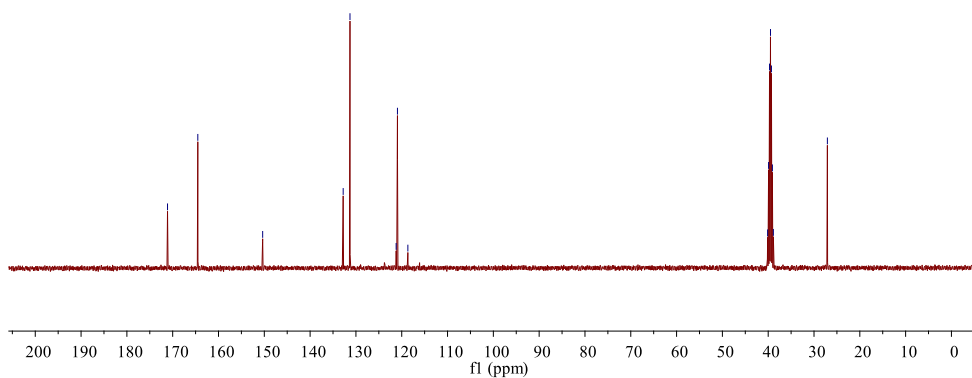

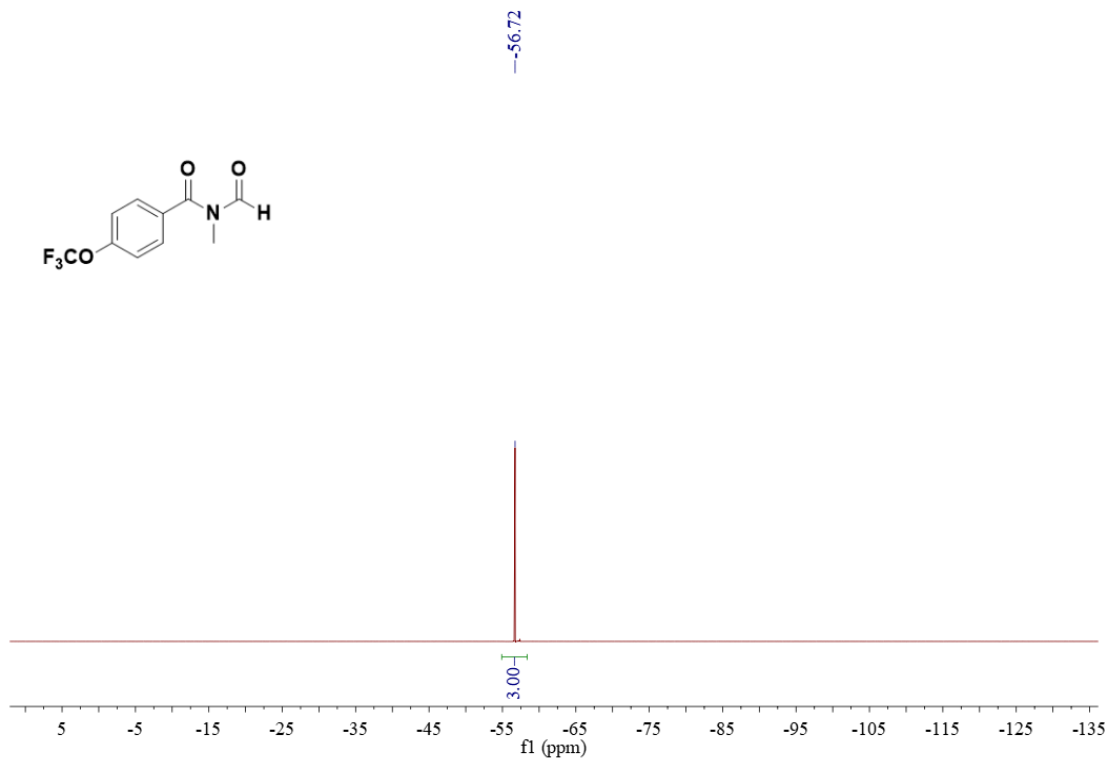

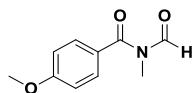

***N*-Formyl-4-Methoxy-*N*-methylbenzamide (2f)**

petroleum ether / ethyl acetate = 5:1, white solid, 44% yield (17.0 mg). mp: 77 – 79°C. <sup>1</sup>H NMR (400 MHz, DMSO-*d*<sub>6</sub>) δ 8.89 (s, 1H), 7.61 (d, *J* = 8.8 Hz, 2H), 7.06 (d, *J* = 8.8 Hz, 2H), 3.84 (s, 3H), 3.10 (s, 3H). <sup>13</sup>C NMR (100 MHz, DMSO-*d*<sub>6</sub>) δ 171.64, 164.61, 162.13, 131.41, 125.51, 114.04, 55.50, 27.41. HRMS (ESI-TOF): Anal Calcd. For: C<sub>10</sub>H<sub>11</sub>NO<sub>3</sub>+Na<sup>+</sup>: 216.0631, Found: 216.0621. IR (neat, cm<sup>-1</sup>): ν 3006, 2934, 1624, 1575, 1300, 1246, 840, 797.

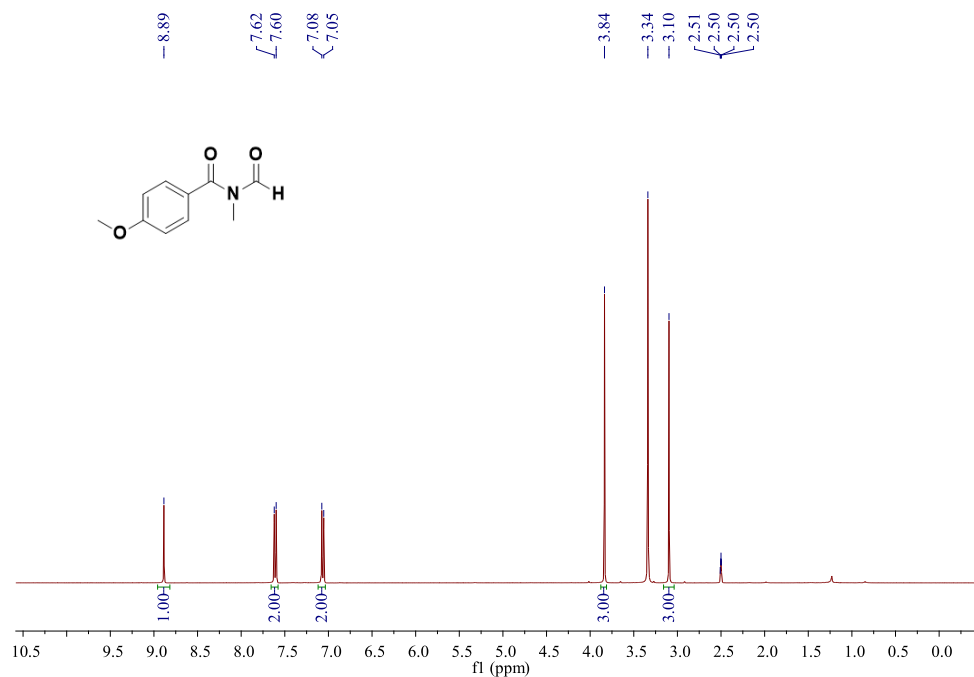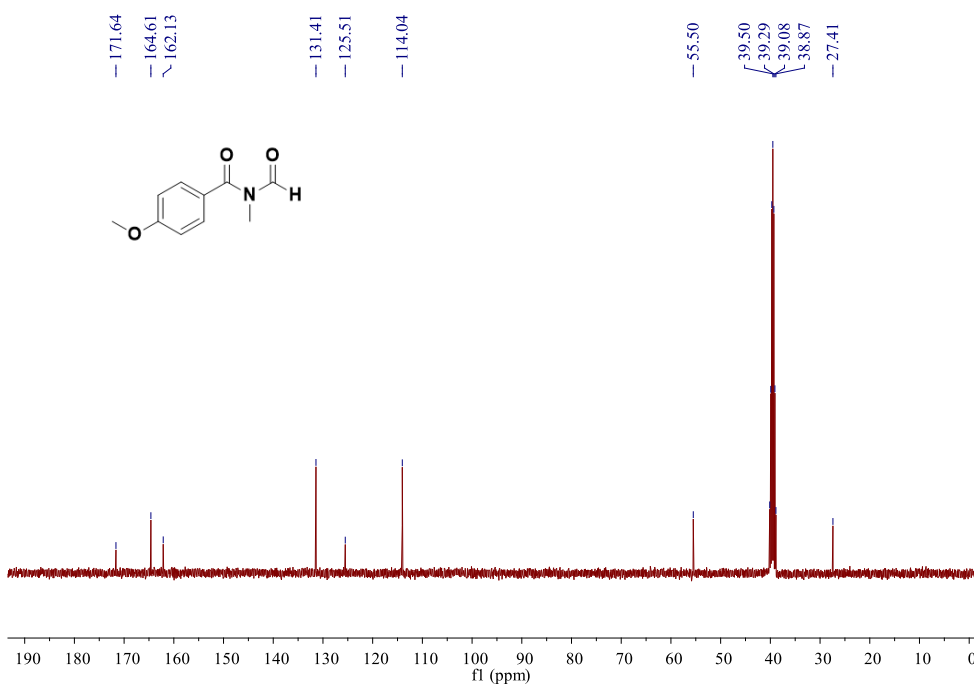

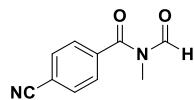

#### 4-Cyano-N-formyl-N-methylbenzamide (2g)

petroleum ether / ethyl acetate = 5:1, white solid, 78% yield (29.3 mg). mp: 120 – 121°C. <sup>1</sup>H NMR (300 MHz, DMSO-*d*<sub>6</sub>) δ 8.78 (s, 1H), 8.00 (d, *J* = 8.2 Hz, 2H), 7.80 (d, *J* = 8.2 Hz, 2H), 3.11 (s, 3H). <sup>13</sup>C NMR (75 MHz, DMSO-*d*<sub>6</sub>) δ 171.08, 164.45, 137.95, 132.68, 129.41, 118.10, 113.86, 26.93. HRMS (EI-TOF): Anal Calcd. For. C<sub>10</sub>H<sub>8</sub>N<sub>2</sub>O<sub>2</sub>: 188.0586, Found: 188.0588. IR (neat, cm<sup>-1</sup>): ν 3041, 2930, 2225, 1622, 1558, 1491, 1396, 857, 763.

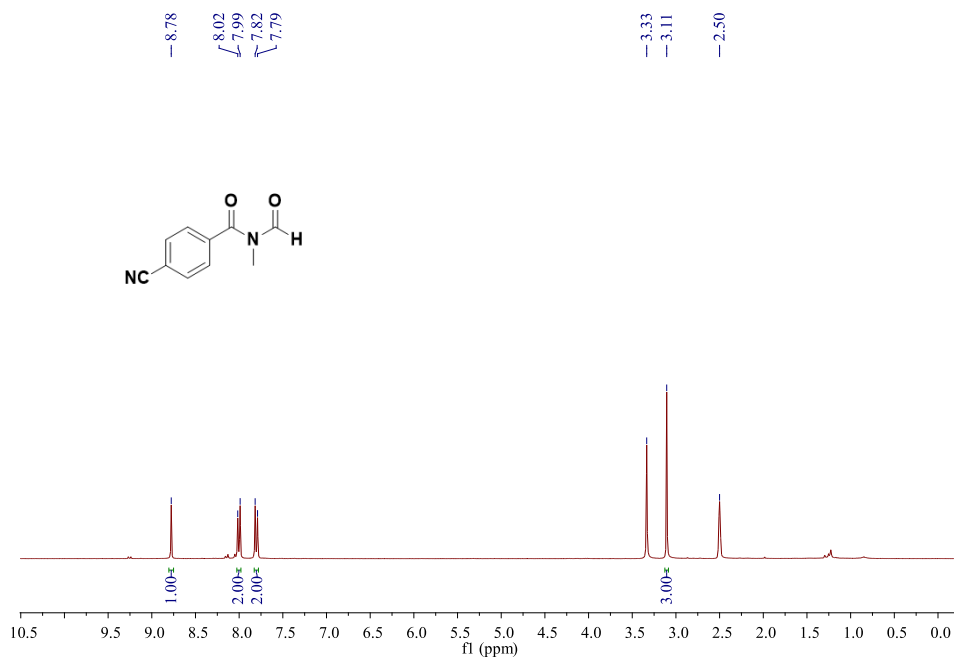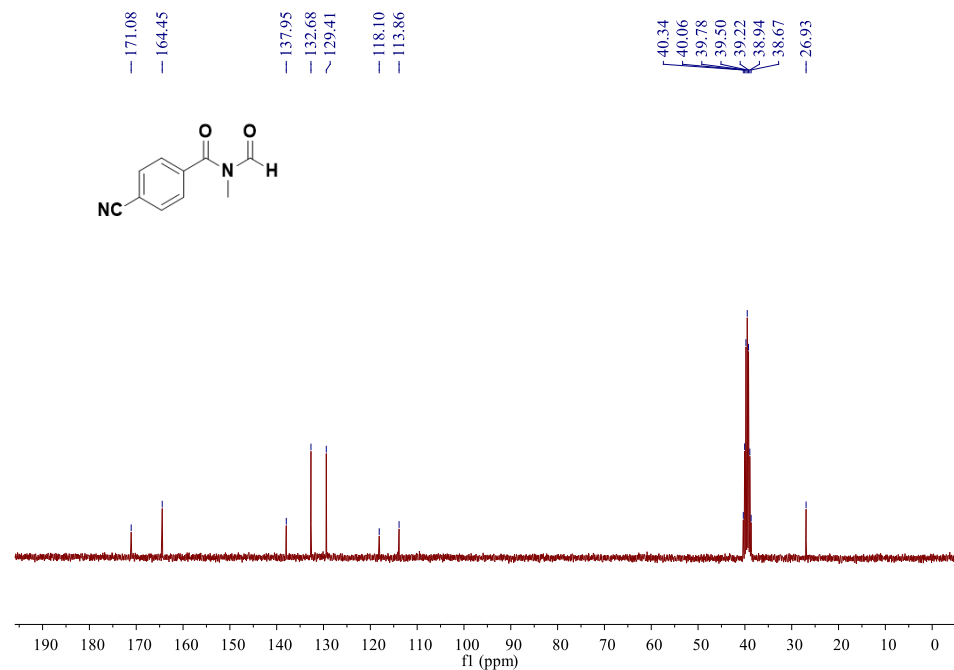

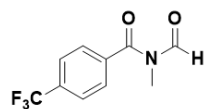

***N*-Formyl-*N*-Methyl-4-(trifluoromethyl)benzamide (2h)**

petroleum ether / ethyl acetate = 5:1, yellow solid, 54% yield (25.0 mg). mp: 60 – 62°C. <sup>1</sup>H NMR (400 MHz, DMSO-*d*<sub>6</sub>) δ 8.81 (s, 1H), 7.90 (d, *J* = 8.3 Hz, 2H), 7.84 (d, *J* = 8.3 Hz, 2H), 3.12 (s, 3H). <sup>13</sup>C NMR (100 MHz, DMSO-*d*<sub>6</sub>) δ 171.23, 164.44, 137.65, 131.32 (q, *J* = 32.2 Hz), 129.54, 125.62 (q, *J* = 3.7 Hz), 123.71 (q, *J* = 272.5 Hz), 26.93. <sup>19</sup>F NMR (377 MHz, DMSO-*d*<sub>6</sub>) δ -61.59 (s, 3F). HRMS (EI-TOF): Anal Calcd. For. C<sub>10</sub>H<sub>8</sub>F<sub>3</sub>NO<sub>2</sub>: 231.0507, Found: 231.0500. IR (neat, cm<sup>-1</sup>): ν 3061, 2998, 1620, 1578, 1452, 1322, 861, 781.

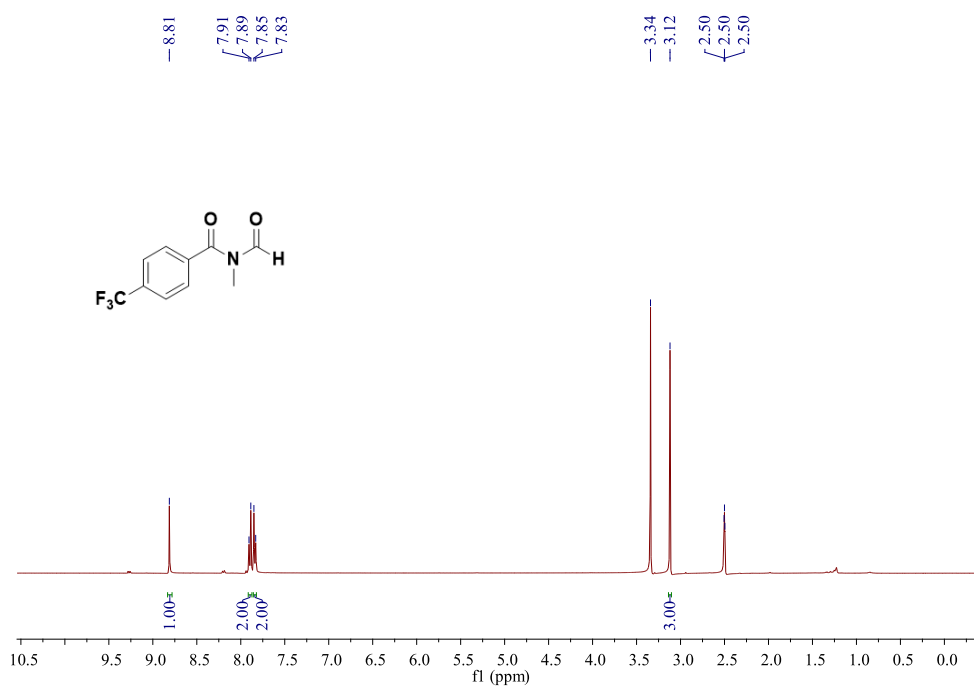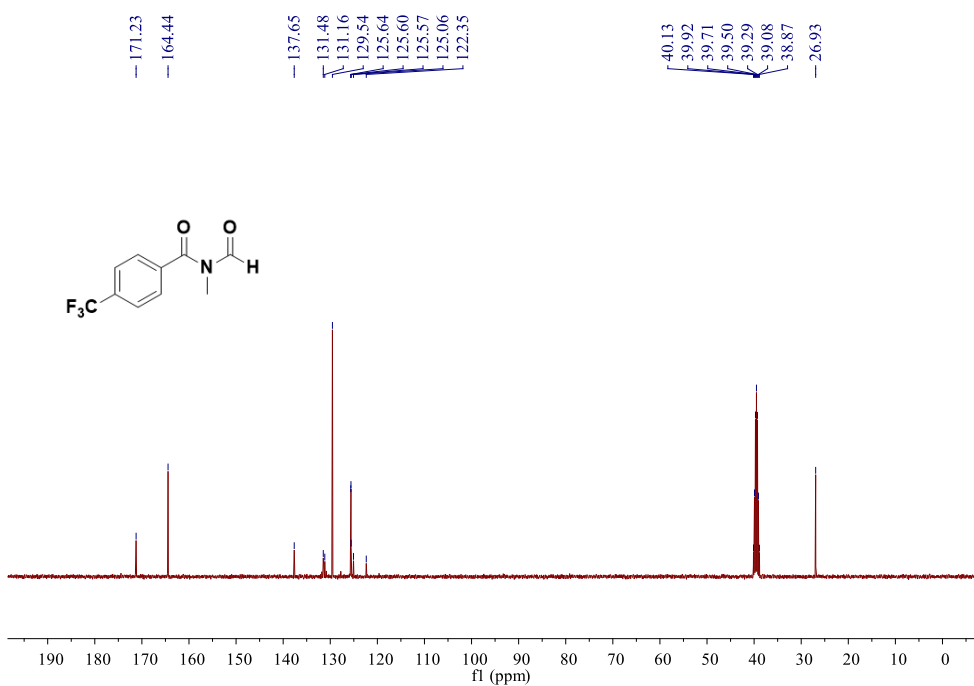

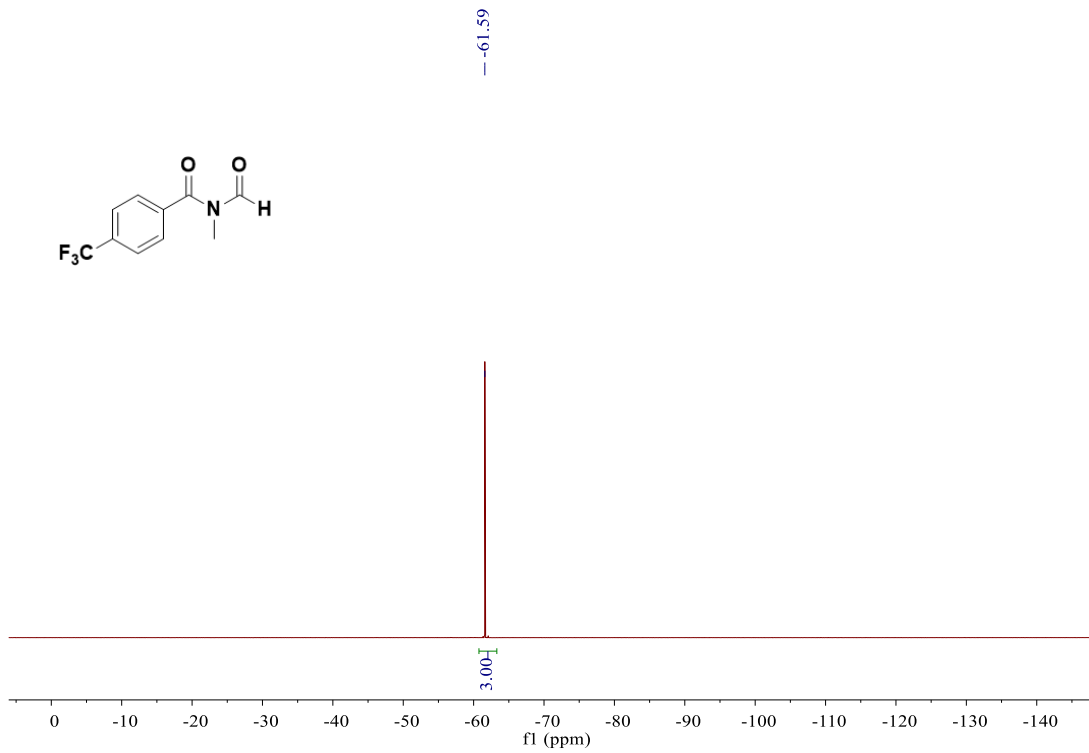



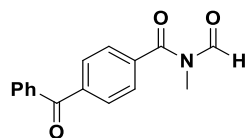

#### 4-Benzoyl-N-Formyl-N-Methylbenzamide (2i)

petroleum ether / ethyl acetate = 5:1, white solid, 80% yield (42.7 mg). mp: 111 – 113°C.  $^1\text{H NMR}$  (400 MHz, DMSO-*d*<sub>6</sub>)  $\delta$  8.89 (s, 1H), 7.85 – 7.77 (m, 6H), 7.73 – 7.69 (m, 1H), 7.60 – 7.56 (m, 2H), 3.14 (s, 3H).  $^{13}\text{C NMR}$  (100 MHz, DMSO-*d*<sub>6</sub>)  $\delta$  195.23, 171.67, 164.63, 139.41, 137.00, 136.42, 133.17, 129.81, 129.65, 128.84, 128.69, 26.97. **HRMS** (ESI-TOF): Anal Calcd. For. C<sub>16</sub>H<sub>13</sub>NO<sub>3</sub>+Na<sup>+</sup>: 290.0788, Found: 290.0771. **IR** (neat, cm<sup>-1</sup>):  $\nu$  2944, 1724, 1648, 1593, 1403, 1338, 839, 765.

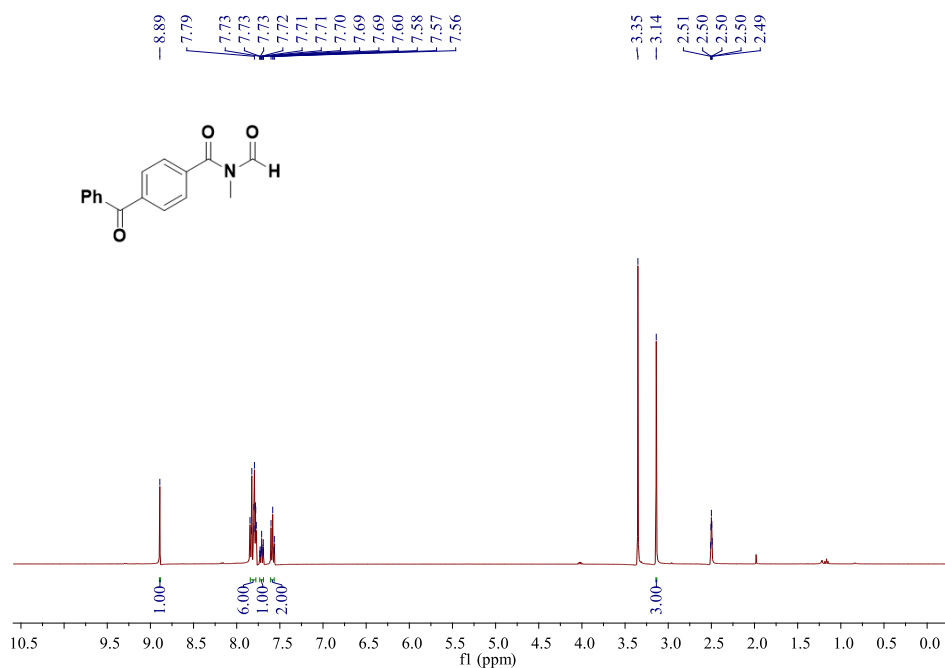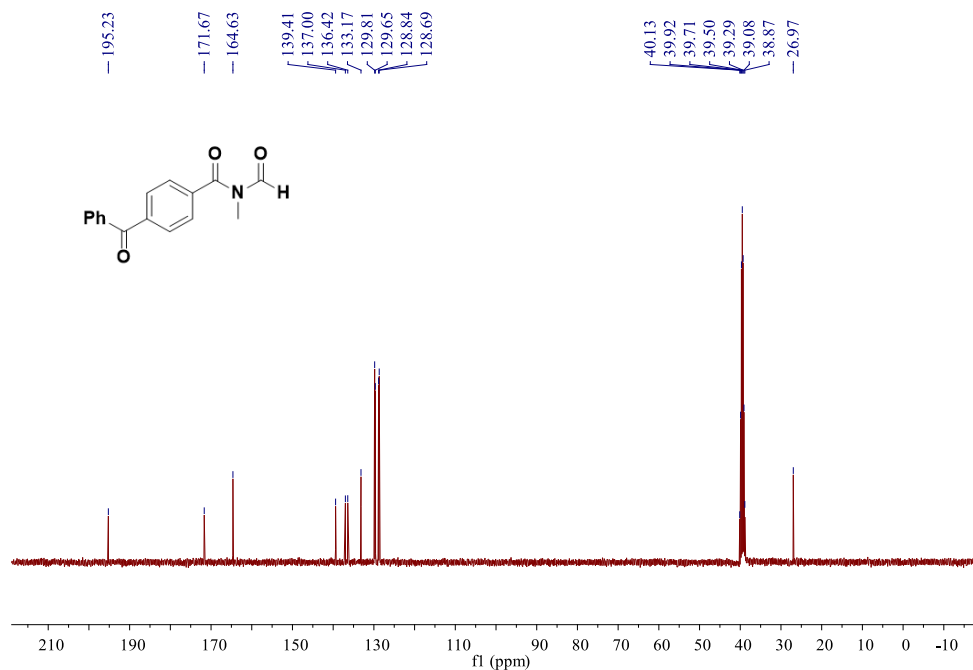

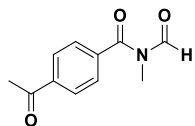

#### 4-Acetyl-*N*-formyl-*N*-methylbenzamide (2j)

petroleum ether / ethyl acetate = 5:1, white solid, 57% yield (23.4 mg). mp: 63 – 65°C.  $^1\text{H NMR}$  (400 MHz, DMSO-*d*<sub>6</sub>)  $\delta$  8.81 (s, 1H), 8.08 – 8.06 (m, 2H), 7.77 – 7.75 (m, 2H), 3.12 (s, 3H), 2.63 (s, 3H).  $^{13}\text{C NMR}$  (100 MHz, DMSO-*d*<sub>6</sub>)  $\delta$  197.58, 171.66, 164.42, 138.69, 137.60, 129.02, 128.36, 26.98, 26.95. **HRMS** (ESI-TOF): Anal Calcd. For. C<sub>11</sub>H<sub>11</sub>NO<sub>3</sub>+Na<sup>+</sup>: 228.0631, Found: 228.0624. **IR** (neat, cm<sup>-1</sup>):  $\nu$  3091, 2941, 1722, 1671, 1525, 1470, 1348, 843, 778.

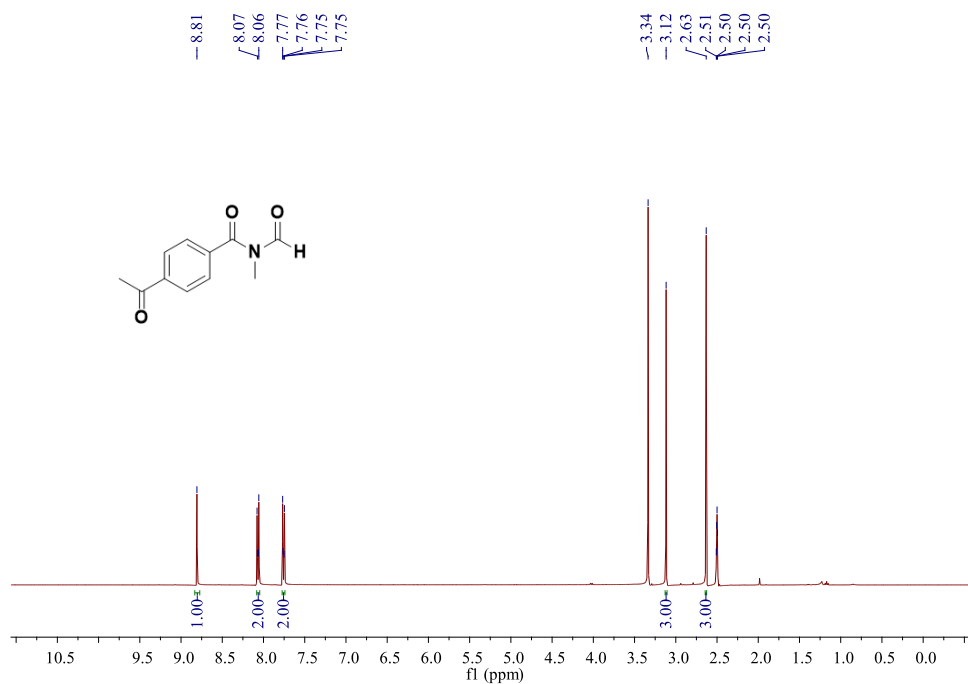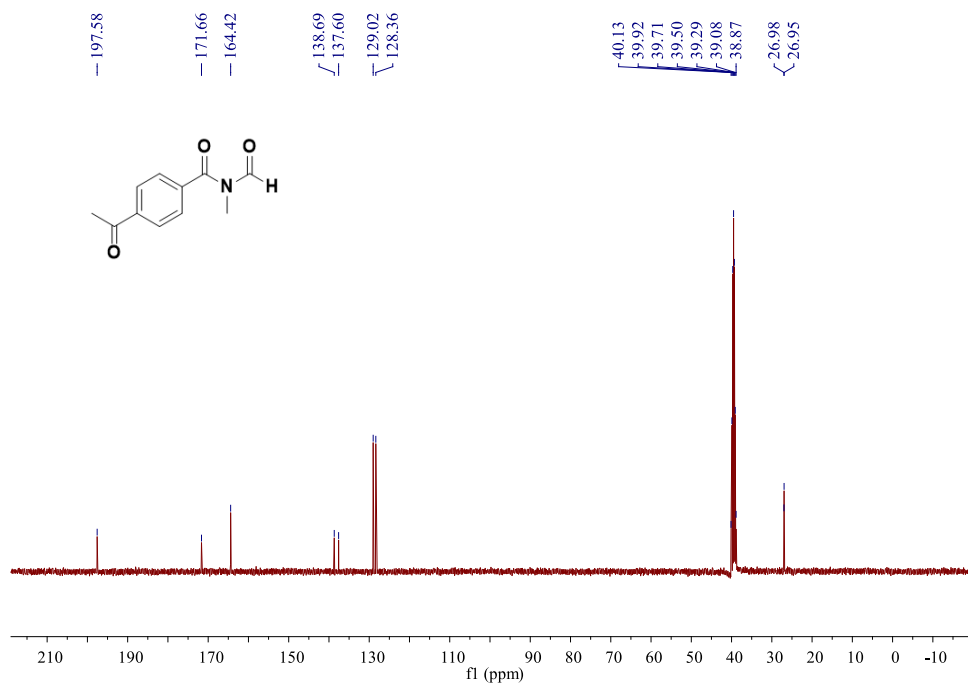

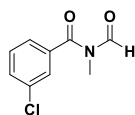

### 3-Chloro-*N*-Formyl-*N*-Methylbenzamide (2k)

petroleum ether / ethyl acetate = 5:1, white solid, 69% yield (27.2 mg). mp: 55 – 57°C.  $^1\text{H NMR}$  (400 MHz, DMSO-*d*<sub>6</sub>)  $\delta$  8.83 (s, 1H), 7.71 (t, *J* = 1.6 Hz, 1H), 7.68 – 7.66 (m, 1H), 7.59 – 7.53 (m, 2H), 3.10 (s, 3H).  $^{13}\text{C NMR}$  (100 MHz, DMSO-*d*<sub>6</sub>)  $\delta$  170.90, 164.48, 135.73, 133.39, 131.47, 130.63, 128.42, 127.32, 27.03. **HRMS** (ESI-TOF): Anal Calcd. For. C<sub>9</sub>H<sub>8</sub><sup>35</sup>ClNO<sub>2</sub>+Na<sup>+</sup>: 220.0136, Found: 220.0137. Anal Calcd. For. C<sub>9</sub>H<sub>8</sub><sup>37</sup>ClNO<sub>2</sub>+Na<sup>+</sup>: 222.0106, Found: 222.0108. **IR** (neat, cm<sup>-1</sup>):  $\nu$  3049, 2930, 2867, 1731, 1614, 1499, 1306, 922, 802, 769.

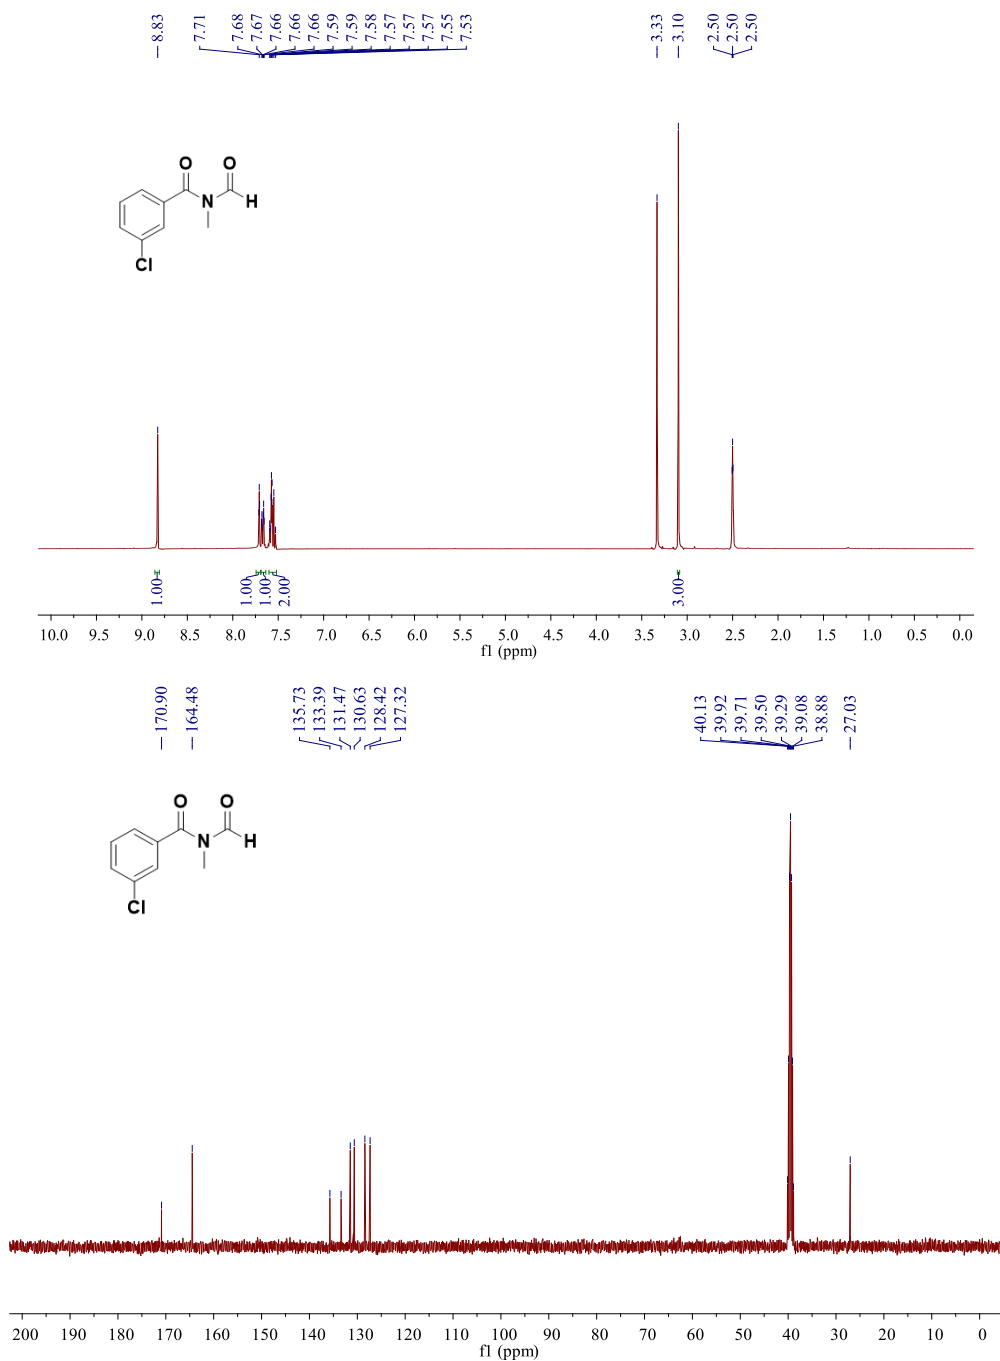

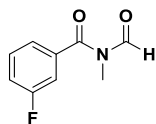

### 3-Fluoro-N-formyl-N-Methylbenzamide (21)

petroleum ether / ethyl acetate = 5:1, yellow solid, 70% yield (25.3 mg). mp: 60 – 62°C.  $^1\text{H NMR}$  (400 MHz, DMSO-*d*<sub>6</sub>)  $\delta$  8.84 (s, 1H), 7.61 – 7.55 (m, 1H), 7.52 – 7.49 (m, 1H), 7.48 – 7.43 (m, 2H), 3.10 (s, 3H).  $^{13}\text{C NMR}$  (100 MHz, DMSO-*d*<sub>6</sub>)  $\delta$  170.95, 164.45, 161.69 (d,  $J = 245.7$  Hz), 135.82 (d,  $J = 7.4$  Hz), 130.98 (d,  $J = 8.1$  Hz), 124.84 (d,  $J = 3.0$  Hz), 118.57 (d,  $J = 21.1$  Hz), 115.68 (d,  $J = 23.8$  Hz), 27.01.  $^{19}\text{F NMR}$  (377 MHz, DMSO-*d*<sub>6</sub>)  $\delta$  -111.86 (s, 1F). **HRMS** (ESI-TOF): Anal Calcd. For.  $\text{C}_9\text{H}_8\text{FNO}_2 + \text{Na}^+$ : 204.0431, Found: 204.0429. **IR** (neat,  $\text{cm}^{-1}$ ):  $\nu$  3073, 2950, 1720, 1656, 1508, 1416, 1340, 851, 785.

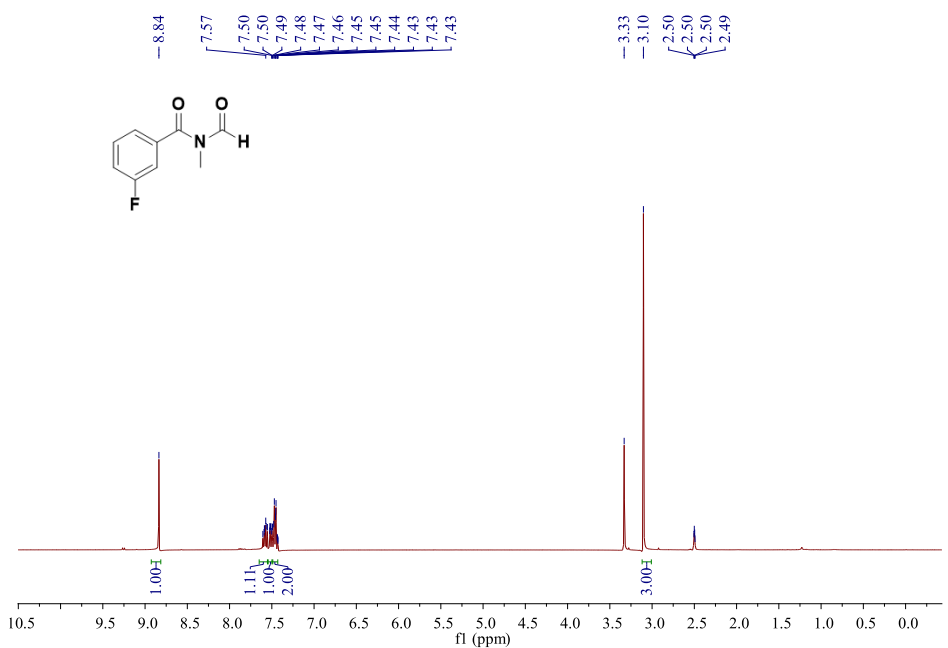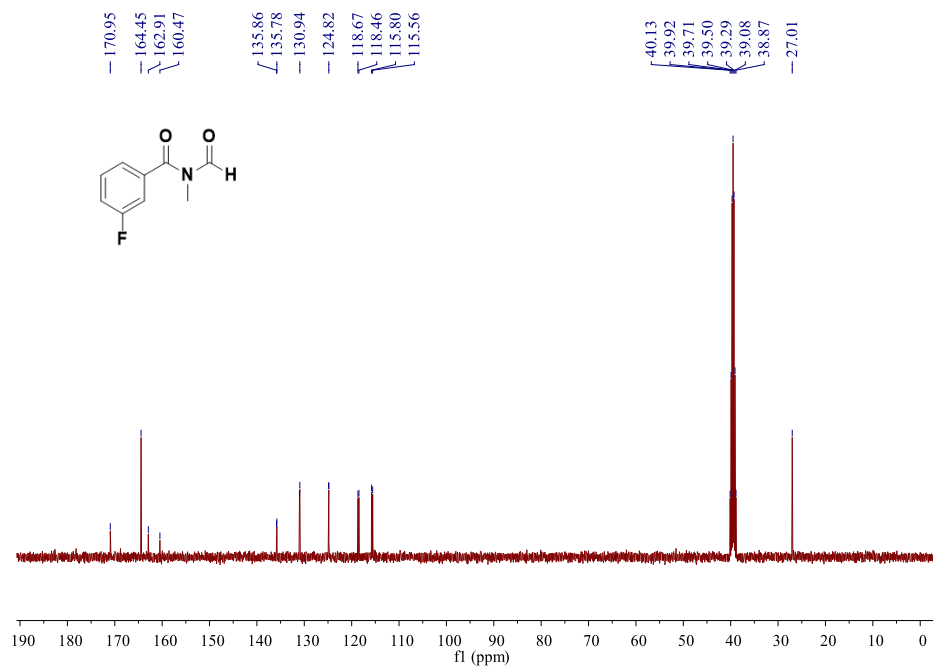

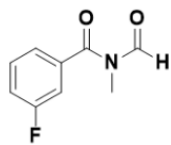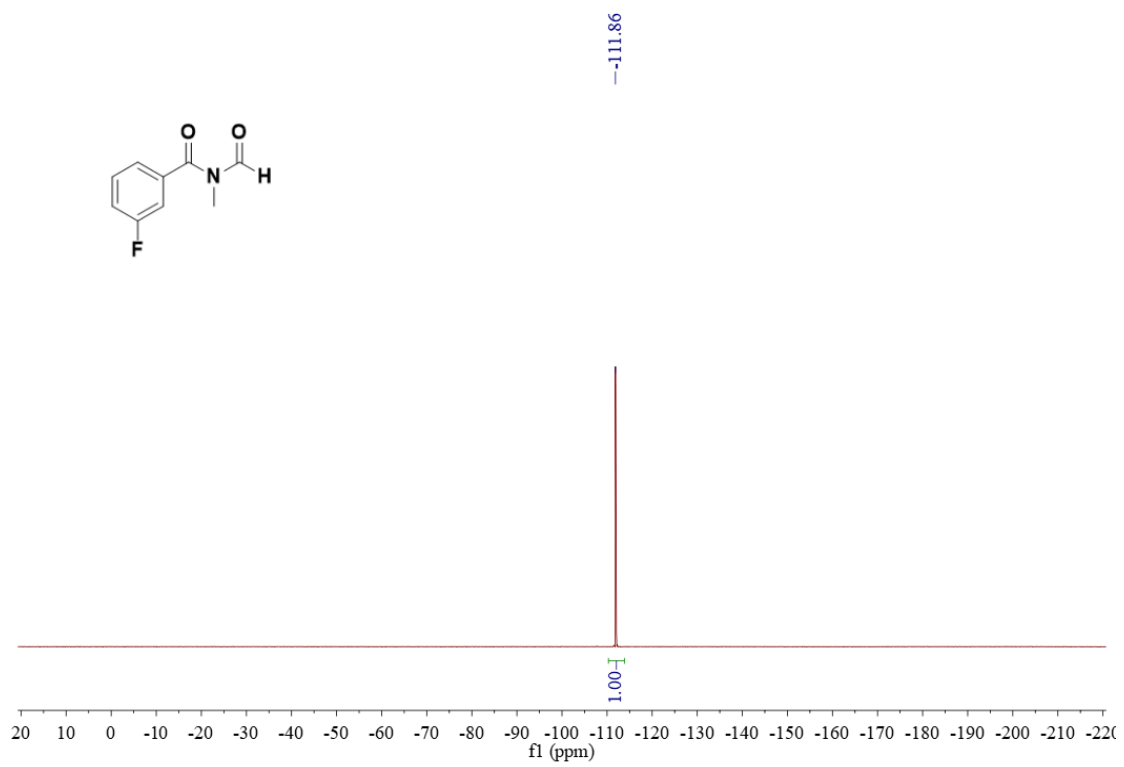

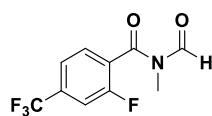

**2-Fluoro-N-Formyl-N-Methyl-4-(trifluoromethyl)Benzamide (2m)**

petroleum ether / ethyl acetate = 5:1, white solid, 80% yield (39.9 mg). mp: 60 – 62°C.  $^1\text{H NMR}$  (400 MHz, DMSO-*d*<sub>6</sub>)  $\delta$  8.83 (d,  $J$  = 2.6 Hz, 1H), 7.90 – 7.86 (m, 2H), 7.77 – 7.75 (m, 1H), 3.14 (s, 3H).  $^{13}\text{C NMR}$  (100 MHz, DMSO-*d*<sub>6</sub>)  $\delta$  166.72, 164.49, 158.06 (d,  $J$  = 250.7 Hz), 133.24 (m), 131.61 (d,  $J$  = 2.9 Hz), 125.82 (d,  $J$  = 15.8 Hz), 122.88 (d,  $J$  = 271.0 Hz), 122.08 (m), 114.15 (m), 26.51.  $^{19}\text{F NMR}$  (377 MHz, DMSO-*d*<sub>6</sub>)  $\delta$  -61.82 (s, 3F), -112.59 (s, 1F). **HRMS** (EI-TOF): Anal Calcd. For. C<sub>10</sub>H<sub>7</sub>F<sub>4</sub>NO<sub>2</sub>: 249.0413, Found: 249.0420. **IR** (neat, cm<sup>-1</sup>):  $\nu$  3056, 2939, 1720, 1642, 1580, 1491, 1327, 893, 767.

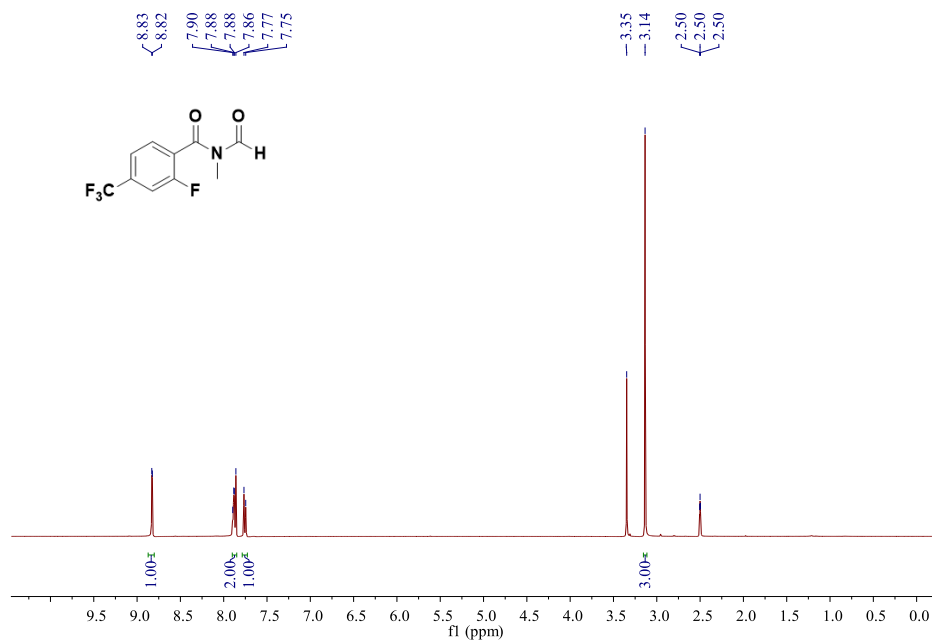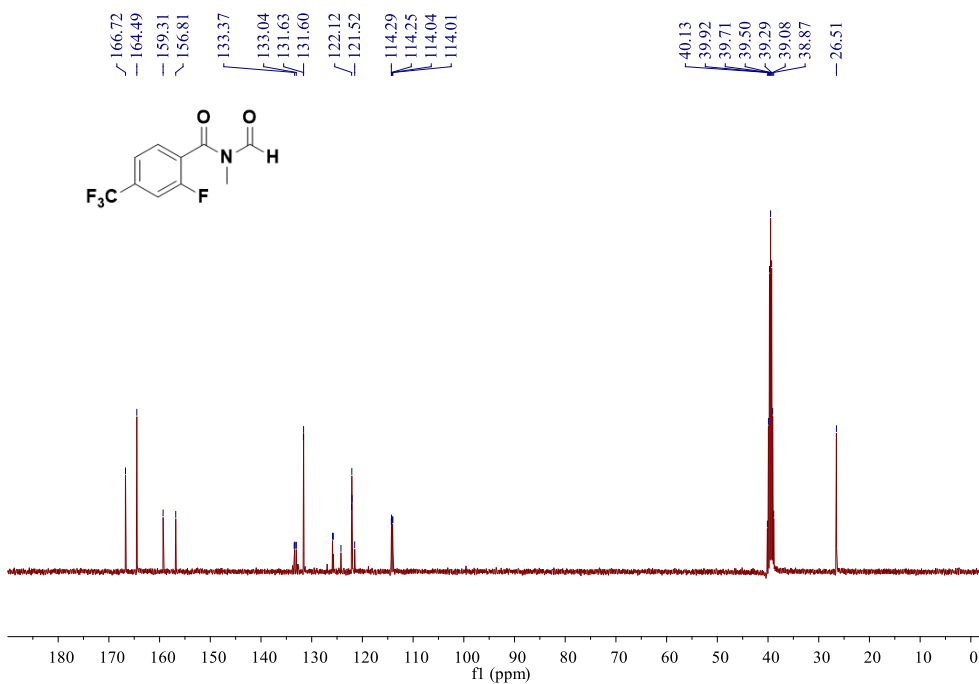

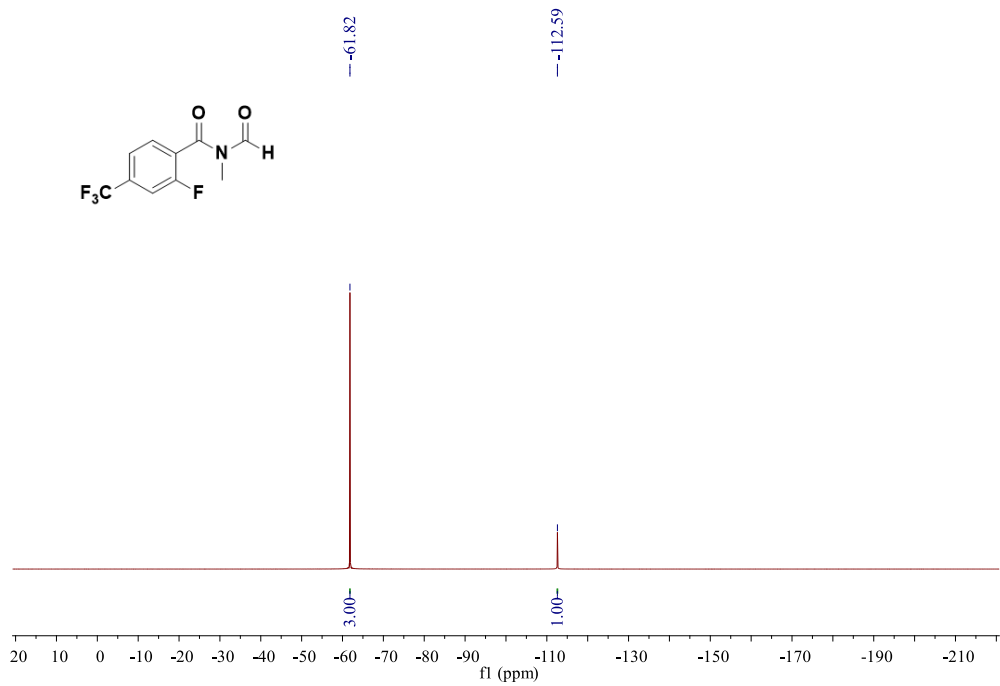

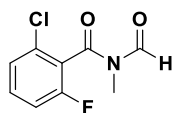

### 2-Chloro-6-fluoro-*N*-formyl-*N*-methylbenzamide (2n)

petroleum ether / ethyl acetate = 5:1, white solid, 74% yield (31.8 mg). mp: 50 – 52°C.  $^1\text{H NMR}$  (300 MHz, DMSO-*d*<sub>6</sub>)  $\delta$  8.79 (s, 1H), 7.67 – 7.62 (m, 1H), 7.53 – 7.42 (m, 2H), 3.17 (s, 3H).  $^{13}\text{C NMR}$  (75 MHz, DMSO-*d*<sub>6</sub>)  $\delta$  164.83, 164.16, 158.48 (d,  $J = 250.0$  Hz), 133.56 (d,  $J = 9.4$  Hz), 130.60, 126.14 (d,  $J = 3.3$  Hz), 121.72 (d,  $J = 21.7$  Hz), 115.45 (d,  $J = 20.7$  Hz), 26.04.  $^{19}\text{F NMR}$  (377 MHz, DMSO-*d*<sub>6</sub>)  $\delta$  -112.96 (s, 1F). **HRMS** (ESI-TOF): Anal Calcd. For.  $\text{C}_9\text{H}_7^{35}\text{ClFNO}_2 + \text{Na}^+$ : 238.0042, Found: 238.0043. Anal Calcd. For.  $\text{C}_9\text{H}_7^{37}\text{ClFNO}_2 + \text{Na}^+$ : 240.0012, Found: 240.0008. **IR** (neat,  $\text{cm}^{-1}$ ):  $\nu$  3041, 2930, 1643, 1571, 1446, 1398, 792.

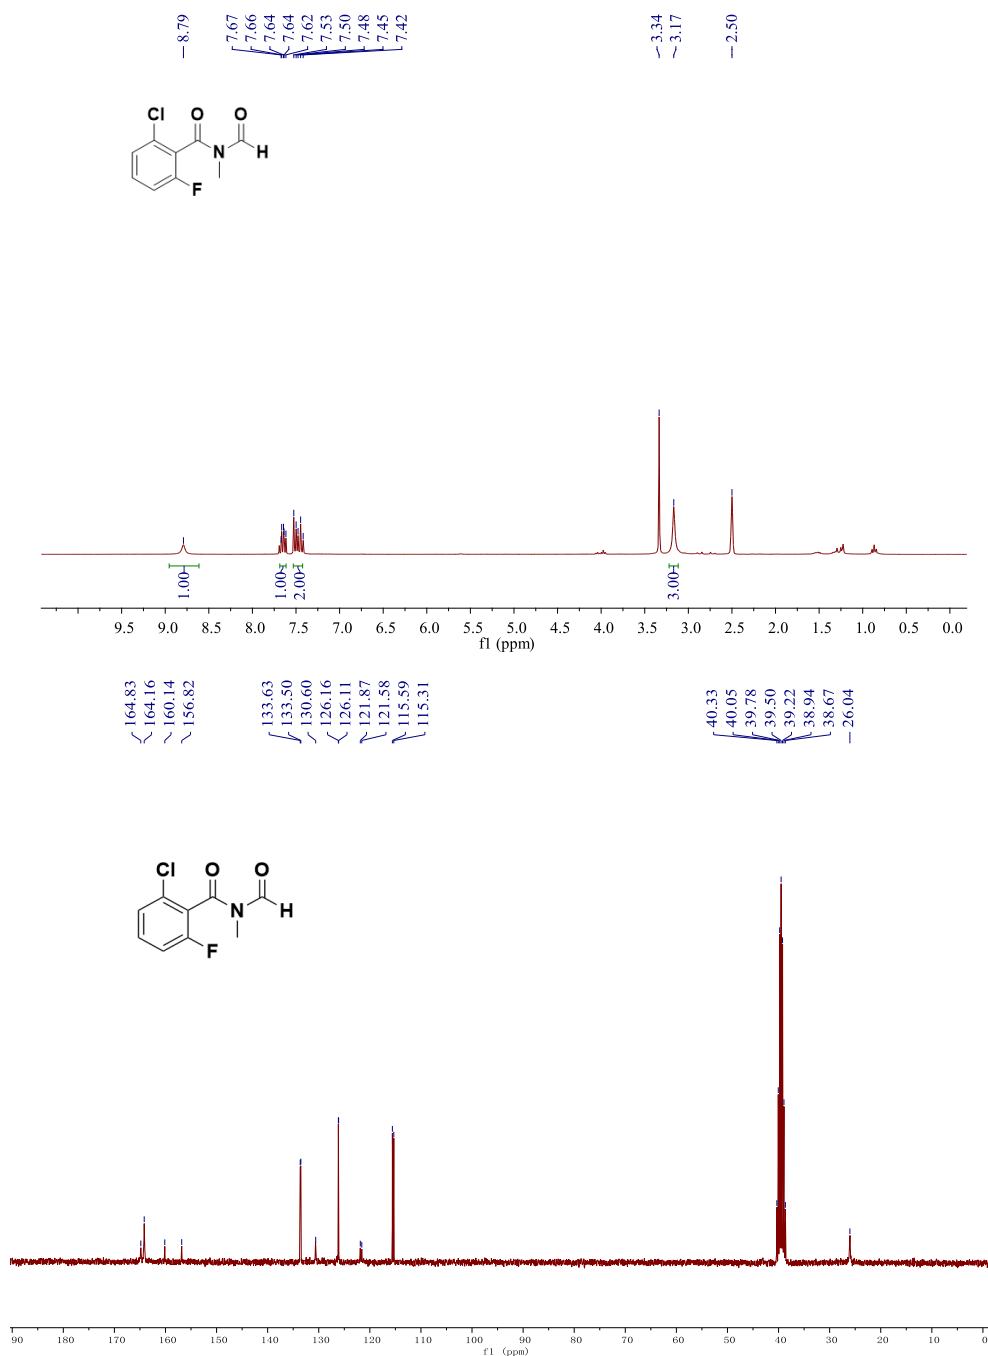



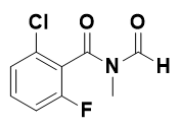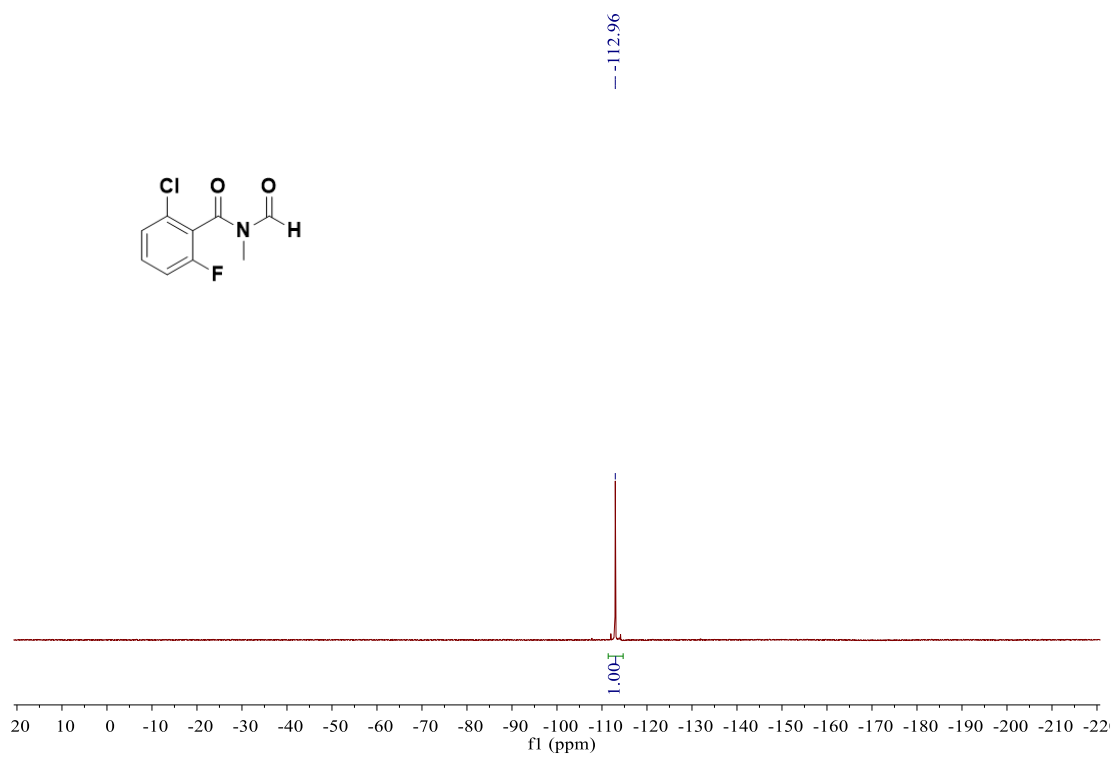

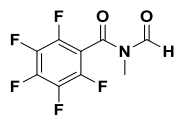

**2,3,4,5,6-Pentafluoro-N-Formyl-N-Methylbenzamide (2o)**

petroleum ether / ethyl acetate = 5:1, white solid, 51% yield (25.8 mg). mp: 80 – 82°C. <sup>1</sup>H NMR (400 MHz, DMSO-*d*<sub>6</sub>) δ 8.98 (s, 1H), 3.16 (s, 3H). <sup>13</sup>C NMR (100 MHz, DMSO-*d*<sub>6</sub>) δ 164.66, 160.35, 143.2 (m), 142.55 (m), 137.46 (m), 108.74 (m), 26.62. <sup>19</sup>F NMR (377 MHz, DMSO-*d*<sub>6</sub>) δ -140.65 (d, *J* = 23.7 Hz, 2F), -150.85 – -152.99 (m, 1F), -160.16 – -160.33 (m, 2F). HRMS (EI-TOF): Anal Calcd. For. C<sub>9</sub>H<sub>4</sub>F<sub>5</sub>NO<sub>2</sub>: 253.0162, Found: 253.0159. IR (neat, cm<sup>-1</sup>): ν 2961, 1742, 1713, 1673, 1503, 1433, 1349.

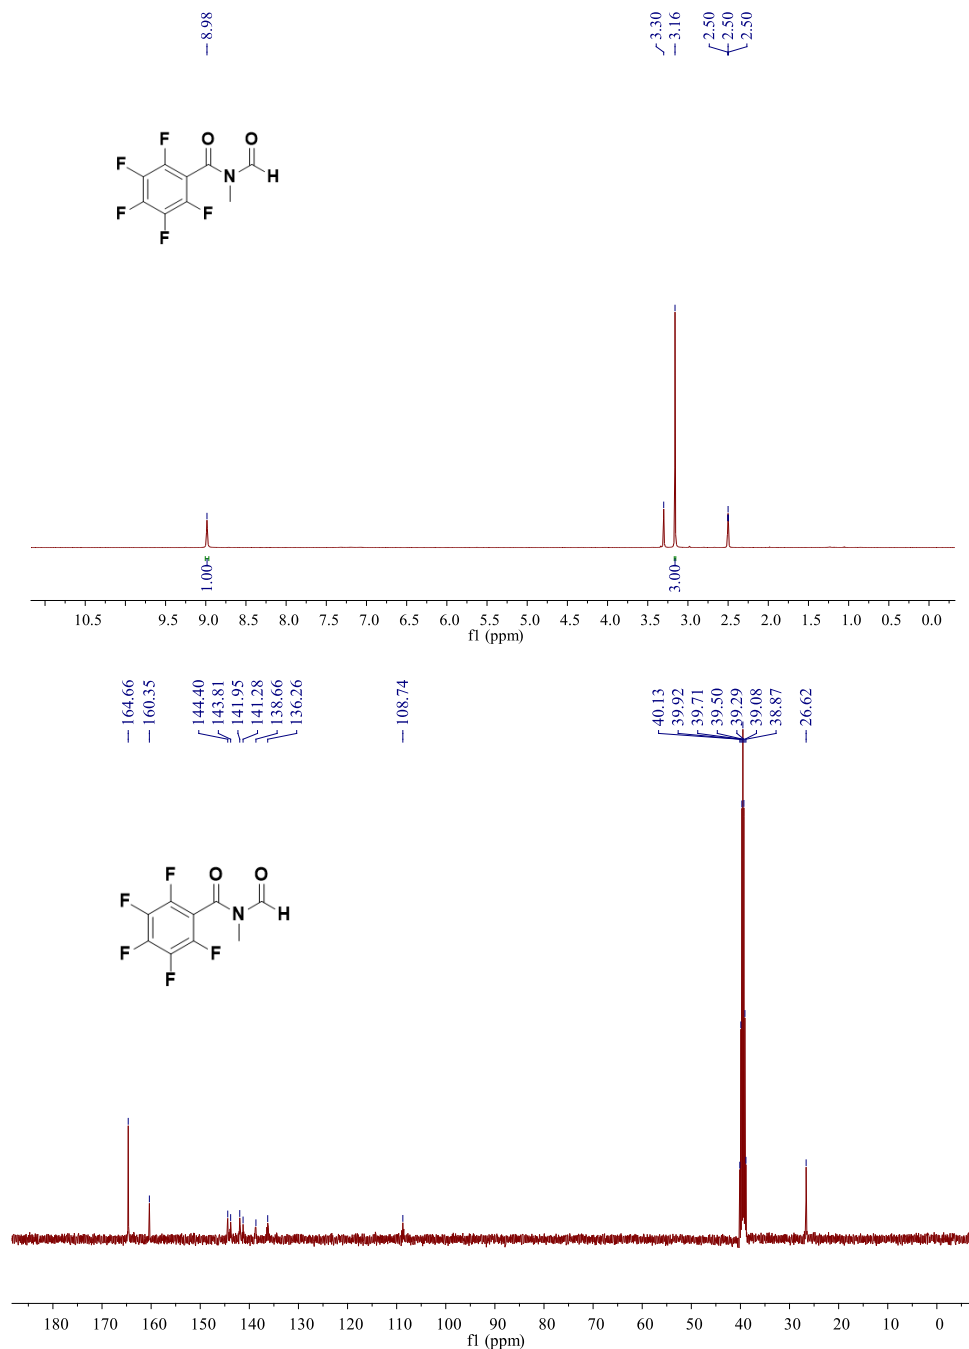

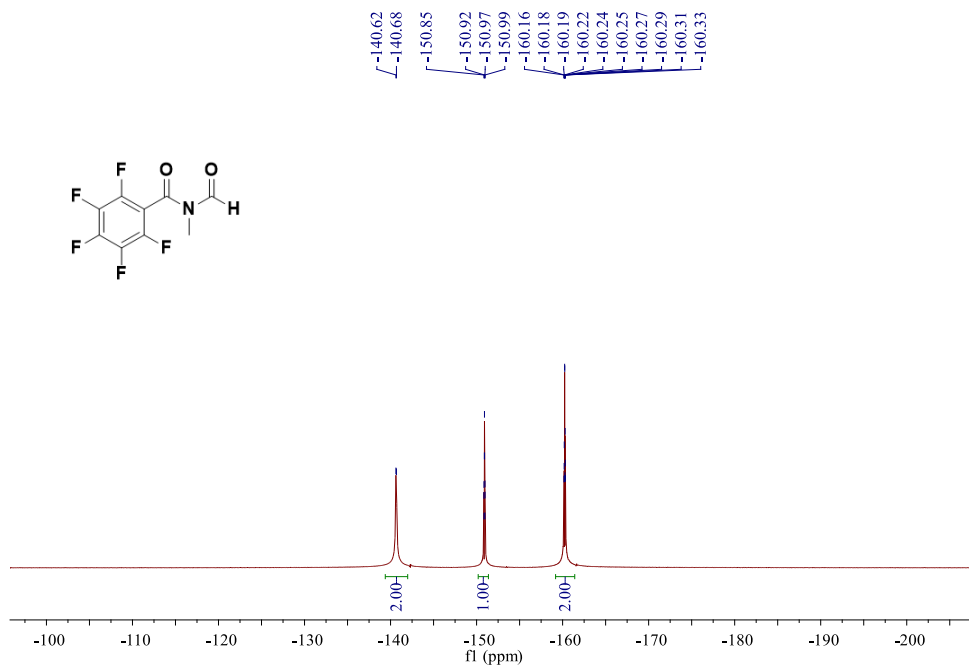

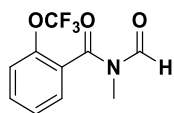

***N*-Formyl-*N*-Methyl-2-(trifluoromethoxy)benzamide (2p)**

petroleum ether / ethyl acetate = 5:1, yellow solid, 60% yield (29.7 mg). mp: 65 – 67°C. <sup>1</sup>H NMR (400 MHz, DMSO-*d*6) δ 8.71 (s, 1H), 7.75 – 7.71 (m, 2H), 7.59 – 7.54 (m, 2H), 3.11 (s, 3H). <sup>13</sup>C NMR (100 MHz, DMSO-*d*6) δ 168.03, 164.19, 144.33, 133.12, 130.28, 128.19, 127.42, 121.48, 119.86 (q, *J* = 258.2 Hz), 26.39. <sup>19</sup>F NMR (377 MHz, DMSO-*d*6) δ -56.61 (s, 3F). HRMS (ESI-TOF): Anal Calcd. For. C<sub>10</sub>H<sub>8</sub>F<sub>3</sub>NO<sub>3</sub>+Na<sup>+</sup>: 270.0348, Found: 270.0344. IR (neat, cm<sup>-1</sup>): ν 2953, 2850, 1731, 1657, 1485, 1350, 765.

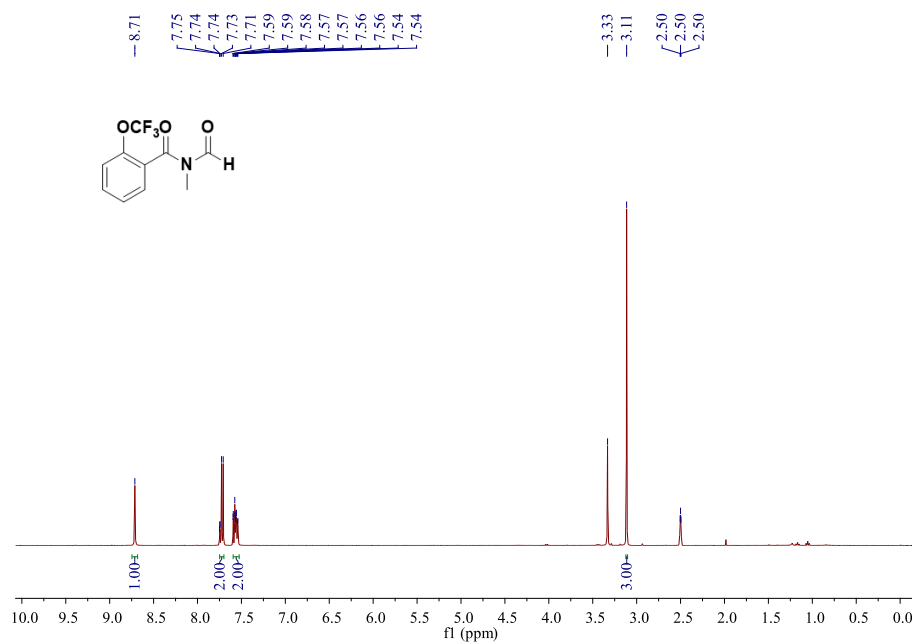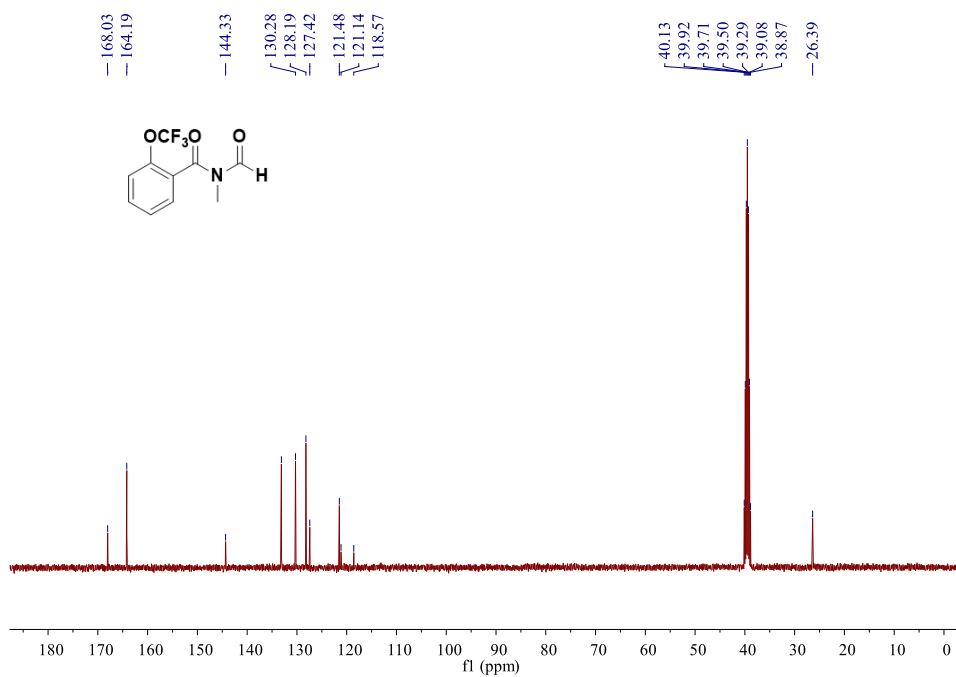

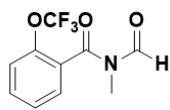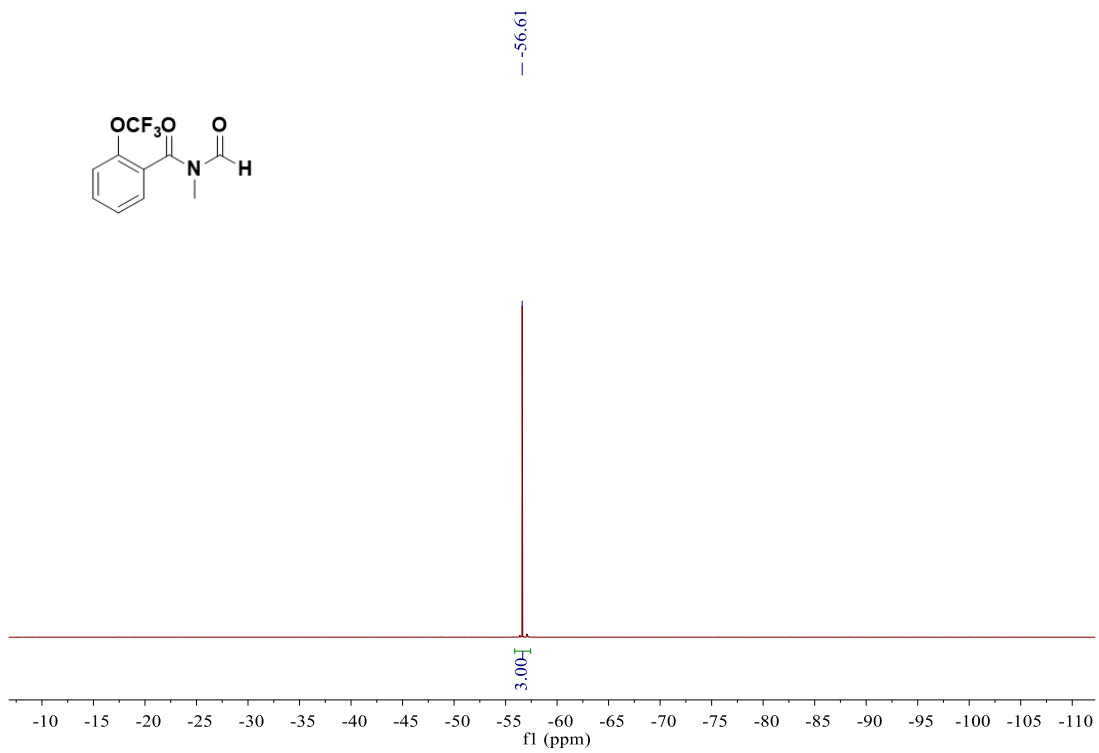

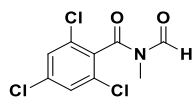

### 2,4,6-Trichloro-*N*-Formyl-*N*-Methylbenzamide (2q)

petroleum ether / ethyl acetate = 5:1, white solid, 57% yield (30.2 mg). mp: 65 – 67°C.  $^1\text{H NMR}$  (400 MHz, DMSO-*d*<sub>6</sub>)  $\delta$  8.82 (s, 1H), 7.89 (s, 2H), 3.17 (s, 3H).  $^{13}\text{C NMR}$  (100 MHz, DMSO-*d*<sub>6</sub>)  $\delta$  166.07, 164.39, 136.45, 131.83, 131.35, 128.82, 25.89. **HRMS** (ESI-TOF): Anal Calcd. For.  $\text{C}_9\text{H}_6^{35}\text{Cl}_3\text{NO}_2+\text{Na}^+$ : 287.9356, Found: 287.9425. Anal Calcd. For.  $\text{C}_9\text{H}_6^{35,35,37}\text{Cl}_3\text{NO}_2+\text{Na}^+$ : 289.9327, Found: 289.9319. **IR** (neat,  $\text{cm}^{-1}$ ):  $\nu$  3066, 2932, 1715, 1637, 1573, 1428, 1370, 886.

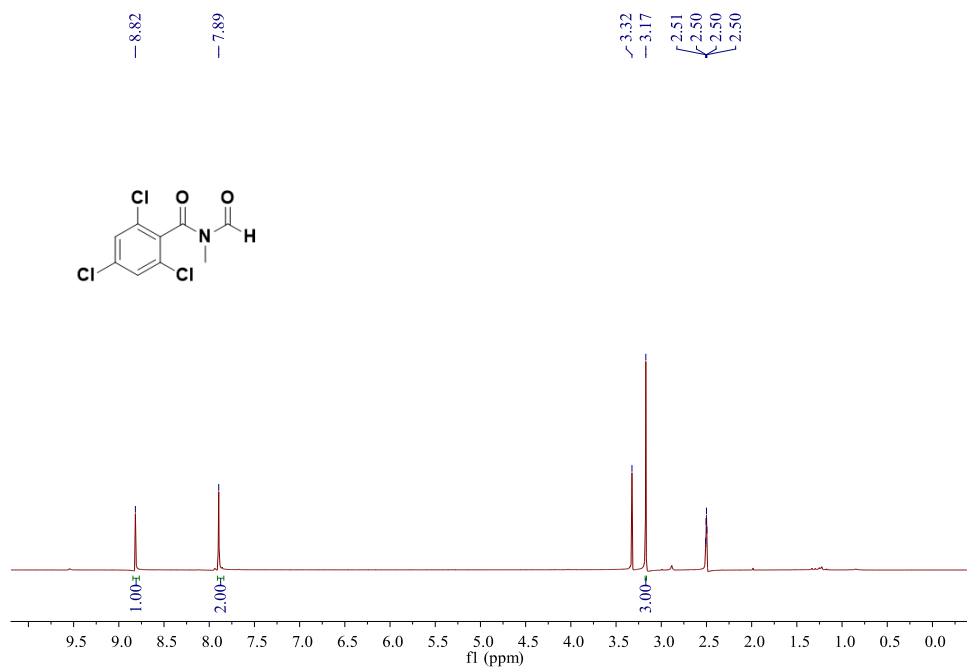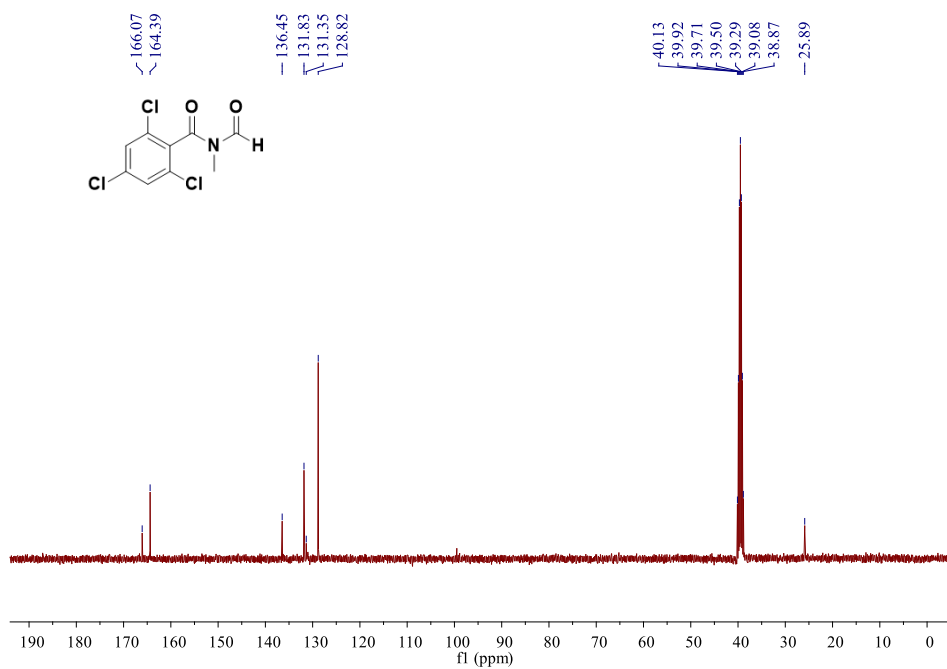

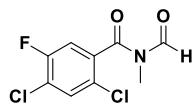

### 2,4-Dichloro-5-Fluoro-N-Formyl-N-Methylbenzamide (2r)

petroleum ether / ethyl acetate = 5:1, white solid, 71% yield (49.8 mg). mp: 55 – 57°C.  $^1\text{H NMR}$  (400 MHz, DMSO-*d*<sub>6</sub>)  $\delta$  8.77 (s, 1H), 8.02 (d, *J* = 6.5 Hz, 1H), 7.82 (d, *J* = 9.0 Hz, 1H), 3.11 (s, 1H).  $^{13}\text{C NMR}$  (100 MHz, DMSO-*d*<sub>6</sub>)  $\delta$  167.48, 164.56, 156.28 (d, *J* = 249.0 Hz), 133.54 (d, *J* = 7.2 Hz), 131.69, 125.71 (d, *J* = 3.8 Hz), 123.05 (d, *J* = 19.0 Hz), 117.74 (d, *J* = 25.5 Hz), 26.15.  $^{19}\text{F NMR}$  (377 MHz, DMSO-*d*<sub>6</sub>)  $\delta$  -116.13 (s, 1F). **HRMS** (EI-TOF): Anal Calcd. For. C<sub>9</sub>H<sub>6</sub>Cl<sub>2</sub>FNO<sub>2</sub>: 248.9760, Found: 248.9753. Anal Calcd. For. C<sub>9</sub>H<sub>6</sub><sup>35</sup>Cl<sup>37</sup>ClFNO<sub>2</sub>: 250.9730, Found: 250.9733. Anal Calcd. For. C<sub>9</sub>H<sub>6</sub><sup>37</sup>Cl<sub>2</sub>FNO<sub>2</sub>: 252.9701, Found: 252.9735. **IR** (neat, cm<sup>-1</sup>):  $\nu$  3070, 1730, 1682, 1511, 1475, 1384, 876.

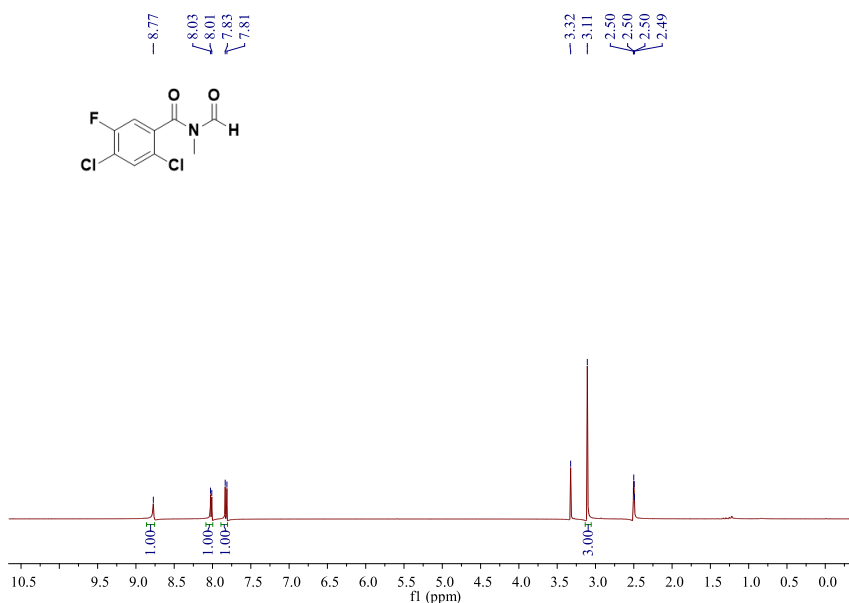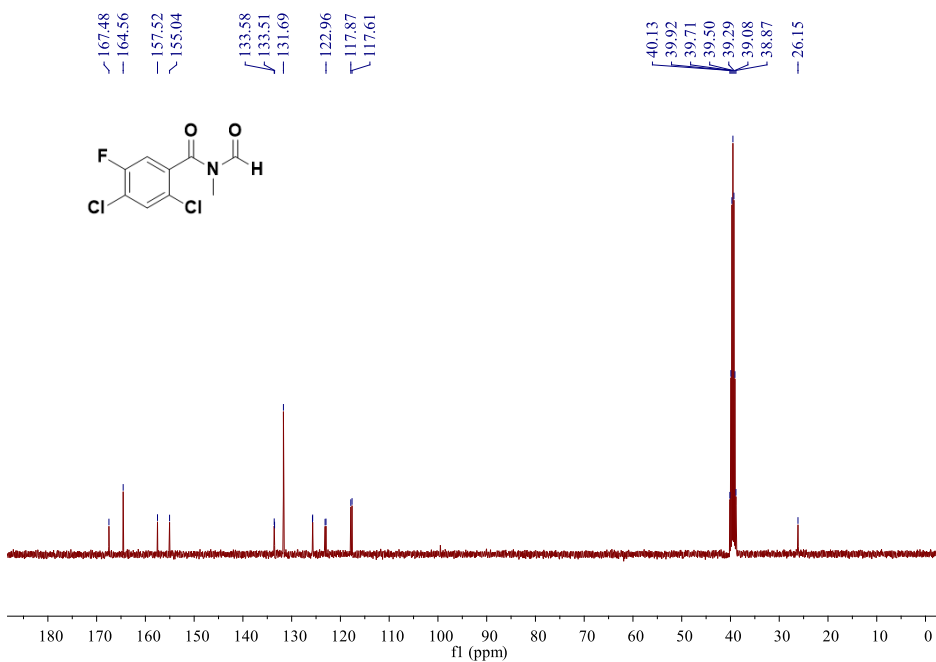

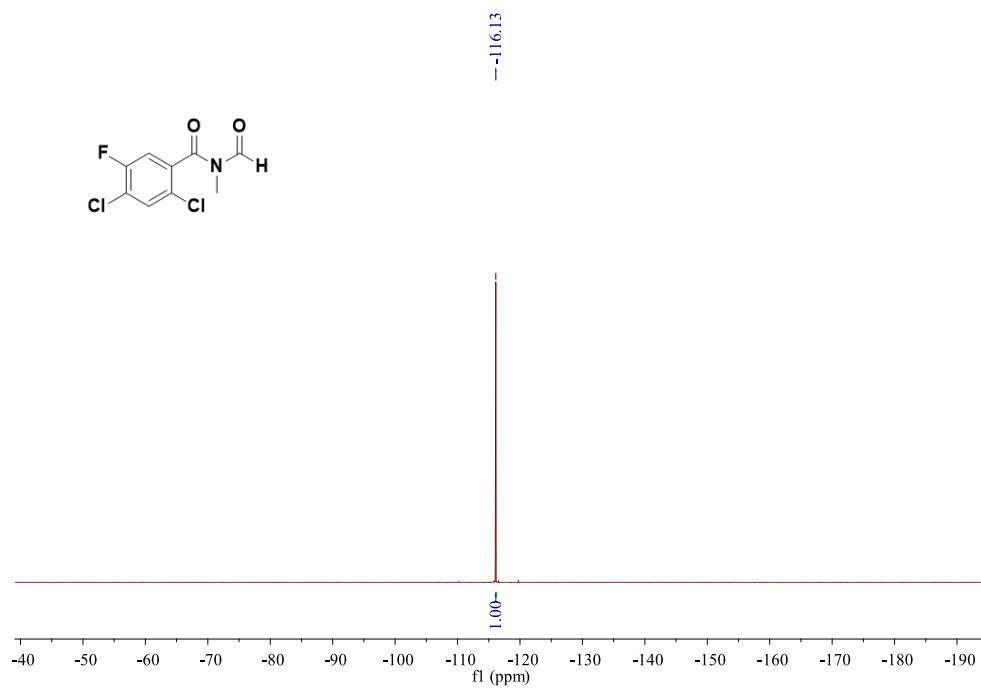



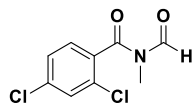

### 2,4-Dichloro-*N*-Formyl-*N*-Methylbenzamide (2s)

petroleum ether / ethyl acetate = 5:1, white solid, 62% yield (28.6 mg). mp: 148 – 150°C. <sup>1</sup>H NMR (400 MHz, DMSO-*d*<sub>6</sub>) δ 8.71 (s, 1H), 7.83 (d, *J* = 1.9 Hz, 1H), 7.67 (d, *J* = 8.3 Hz, 1H), 7.62 (dd, *J* = 8.3, 1.9 Hz, 1H), 3.11 (s, 3H). <sup>13</sup>C NMR (100 MHz, DMSO-*d*<sub>6</sub>) δ 168.69, 164.39, 136.08, 132.19, 130.85, 130.78, 129.51, 128.17, 26.22. HRMS (EI-TOF): Anal Calcd. For. C<sub>9</sub>H<sub>7</sub>Cl<sub>2</sub>NO<sub>2</sub>: 230.9854, Found: 230.9860. IR (neat, cm<sup>-1</sup>): ν 3019, 2934, 1718, 1630, 1587, 1458, 1372, 868, 797.

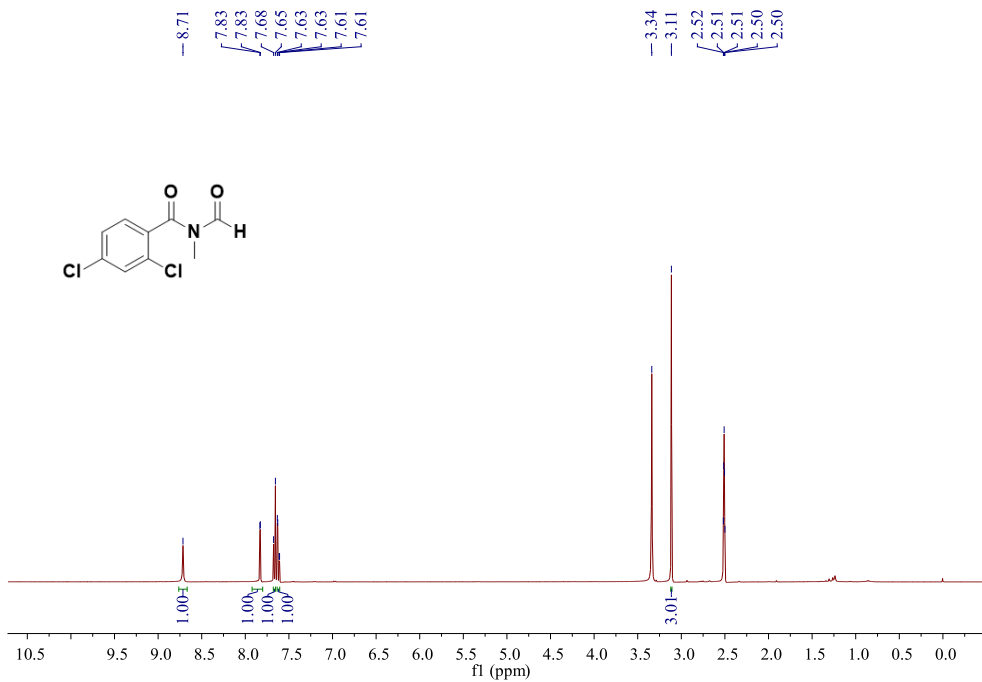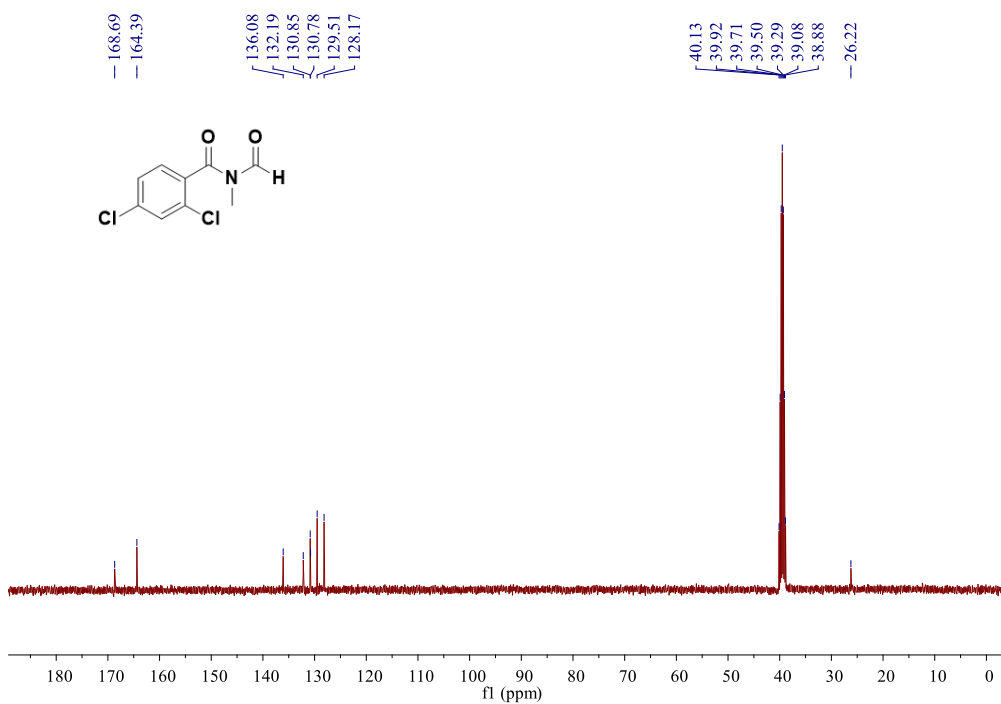

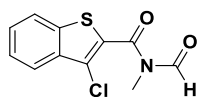

### 3-Chloro-*N*-Formyl-*N*-Methylbenzo[*b*]thiophene-2-Carboxamide (2t)

petroleum ether / ethyl acetate = 5:1, white solid, 38% yield (19.2 mg). mp: 57 – 59°C. <sup>1</sup>H NMR (400 MHz, DMSO-*d*<sub>6</sub>) δ 9.00 (s, 1H), 8.20 – 8.16 (m, 1H), 7.94 – 7.89 (m, 1H), 7.67 – 7.60 (m, 2H), 3.16 (s, 3H). <sup>13</sup>C NMR (100 MHz, DMSO-*d*<sub>6</sub>) δ 165.00, 164.45, 137.97, 134.87, 128.75, 127.94, 126.22, 123.53, 122.73, 121.48, 26.93. HRMS (ESI-TOF): Anal Calcd. For. C<sub>11</sub>H<sub>8</sub><sup>35</sup>ClNO<sub>2</sub>S+Na<sup>+</sup>: 275.9856, Found: 275.9851. Anal Calcd. For. C<sub>11</sub>H<sub>8</sub><sup>37</sup>ClNO<sub>2</sub>S+Na<sup>+</sup>: 277.9827, Found: 277.9808. IR (neat, cm<sup>-1</sup>): ν 3079, 2951, 1659, 1591, 1453, 1305, 730.

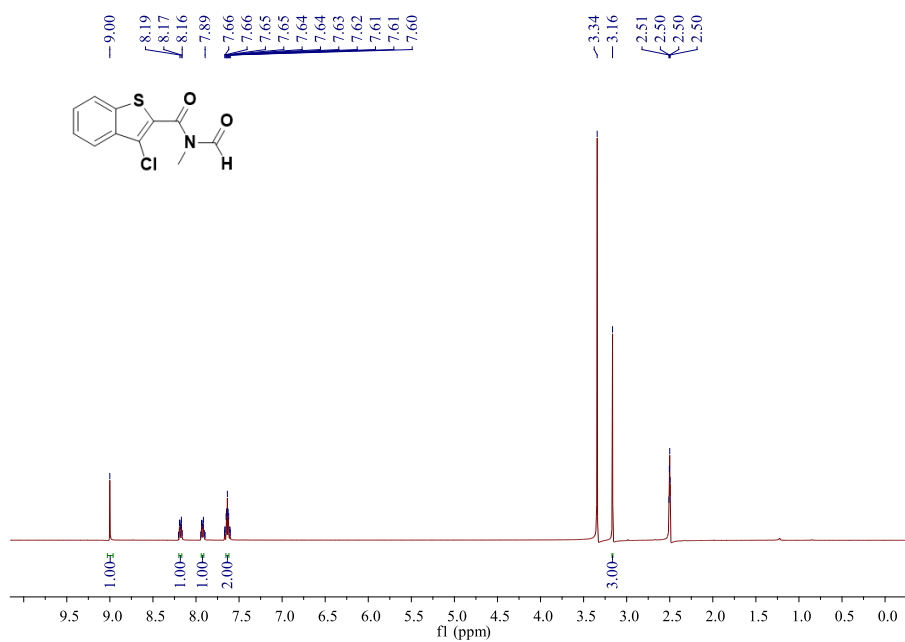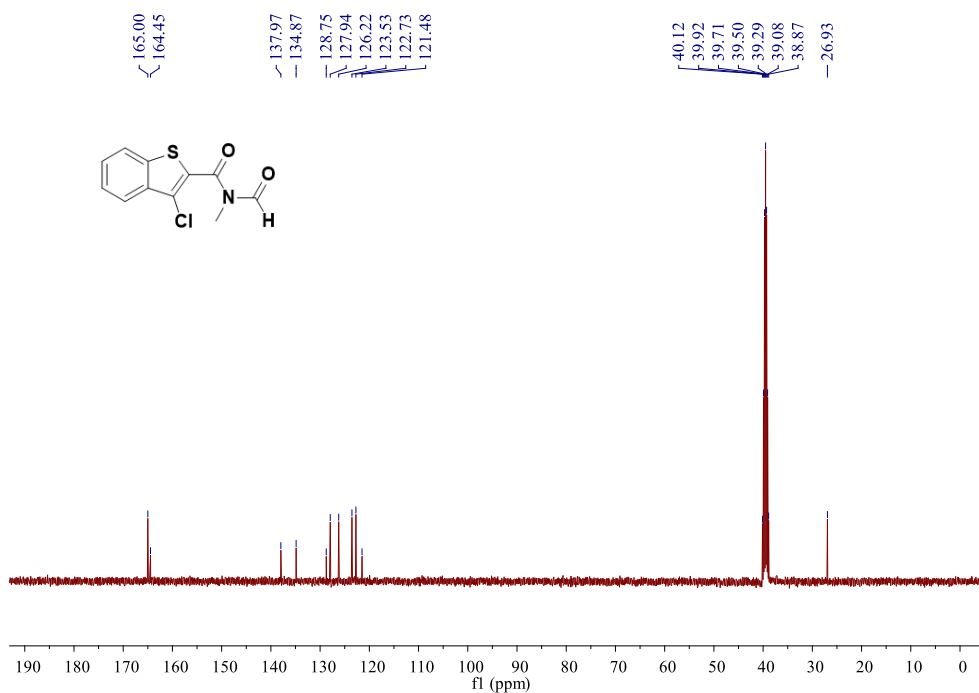

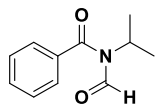

***N*-Formyl-*N*-Isopropylbenzamide (2u)**

petroleum ether / ethyl acetate = 5:1, white solid, 51% yield (19.5 mg). mp: 67 – 69°C. <sup>1</sup>H NMR (400 MHz, DMSO-*d*<sub>6</sub>) δ 8.70 (s, 1H), 7.64 – 7.60 (m, 3H), 7.54 – 7.51 (m, 2H), 4.70 – 4.63 (m, 1H), 1.40 (d, *J* = 6.9 Hz, 6H). <sup>13</sup>C NMR (100 MHz, DMSO-*d*<sub>6</sub>) δ 172.65, 164.45, 134.40, 132.02, 128.98, 128.74, 44.98, 19.34. HRMS (ESI-TOF): Anal Calcd. For. C<sub>11</sub>H<sub>13</sub>NO<sub>2</sub>+Na<sup>+</sup>: 214.0838, Found: 214.0824. IR (neat, cm<sup>-1</sup>): ν 3071, 2937, 1719, 1661, 1528, 1407, 1298, 758, 692.

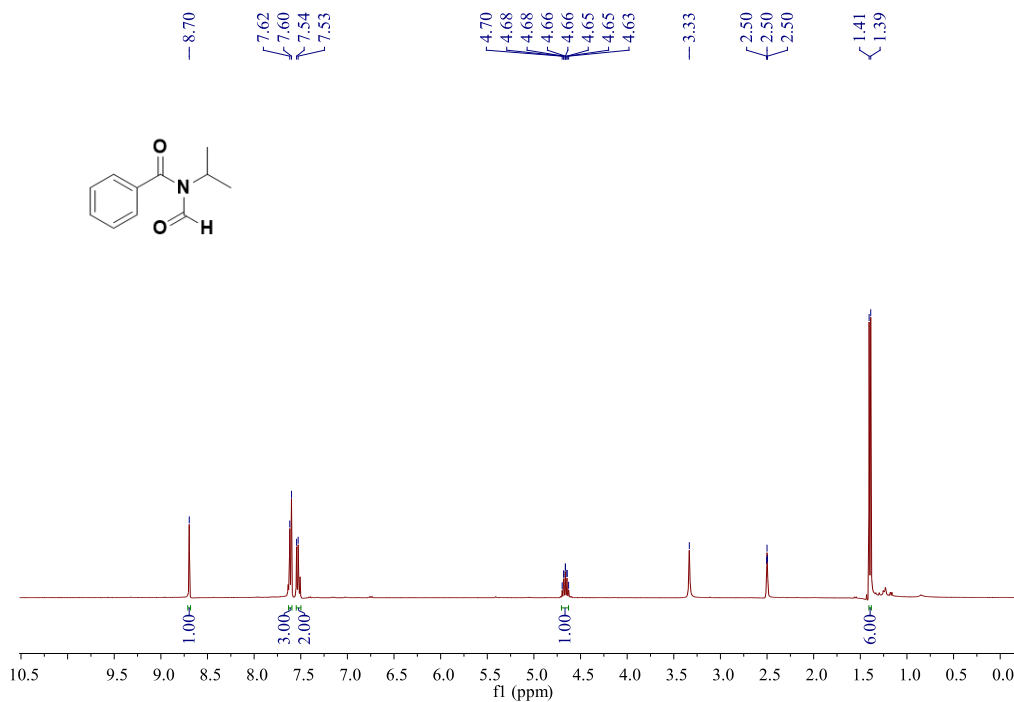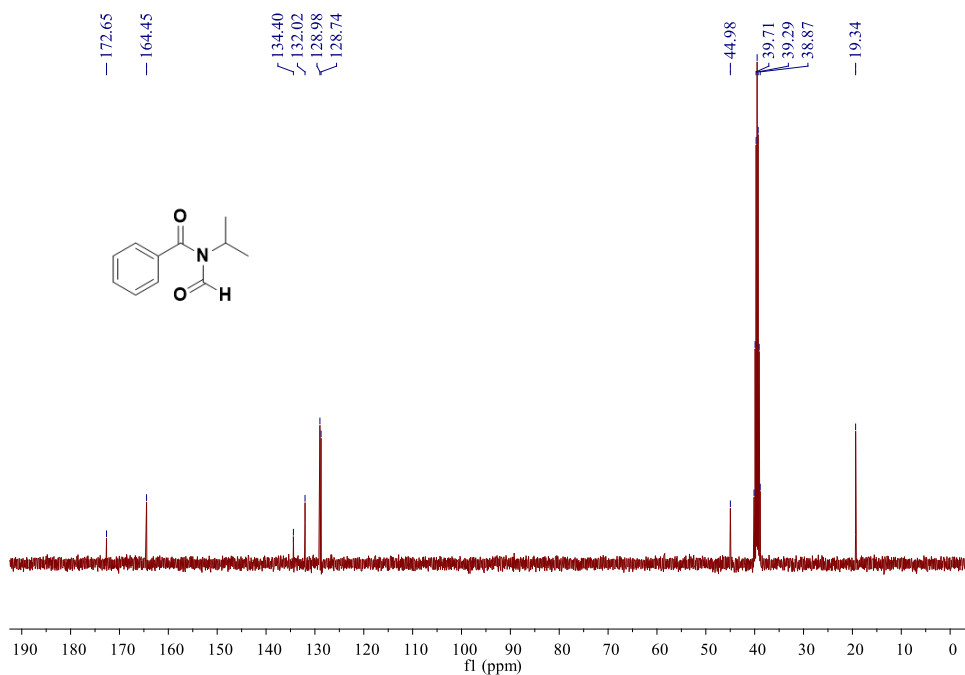

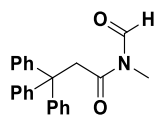

***N*-Formyl-*N*-Methyl-3,3,3-Triphenylpropanamide (2v)**

petroleum ether / ethyl acetate = 5:1, white solid, 77% yield (52.8 mg). mp: 86 – 88°C. <sup>1</sup>H NMR (400 MHz, DMSO-*d*<sub>6</sub>) δ 9.19 (s, 1H), 7.25 – 7.14 (m, 15H), 4.35 (s, 2H), 2.78 (s, 3H). <sup>13</sup>C NMR (100 MHz, DMSO-*d*<sub>6</sub>) δ 171.95, 163.72, 146.57, 128.98, 127.56, 125.83, 55.42, 43.74, 25.55. HRMS (ESI-TOF): Anal Calcd. For. C<sub>23</sub>H<sub>21</sub>NO<sub>2</sub>+Na<sup>+</sup>: 338.1465, Found: 338.1469. IR (neat, cm<sup>-1</sup>): ν 3058, 2935, 1732, 1671, 1569, 1446, 1361, 744, 690.

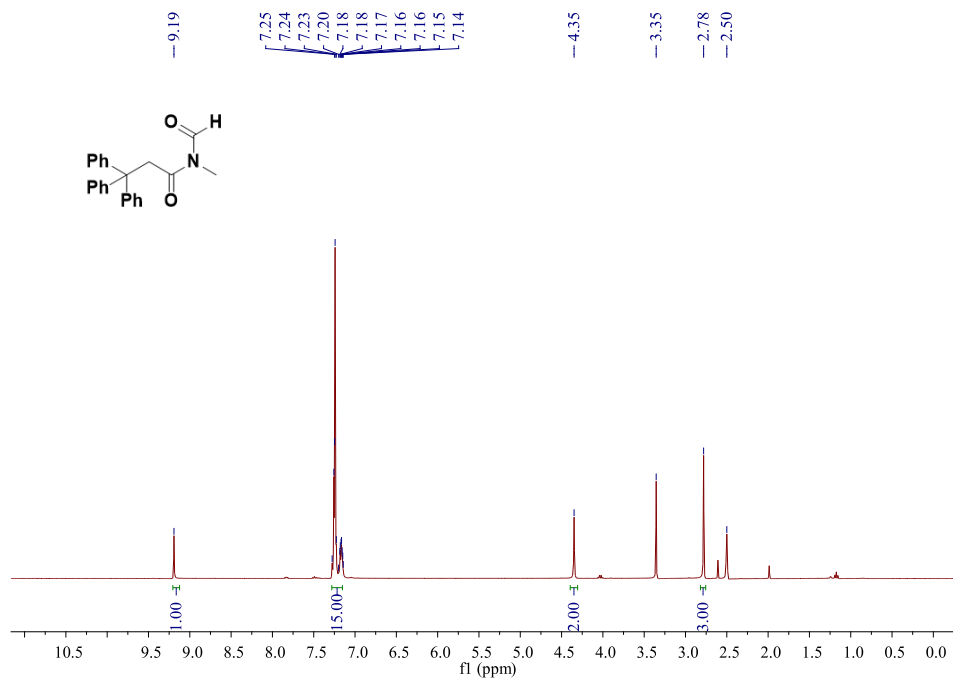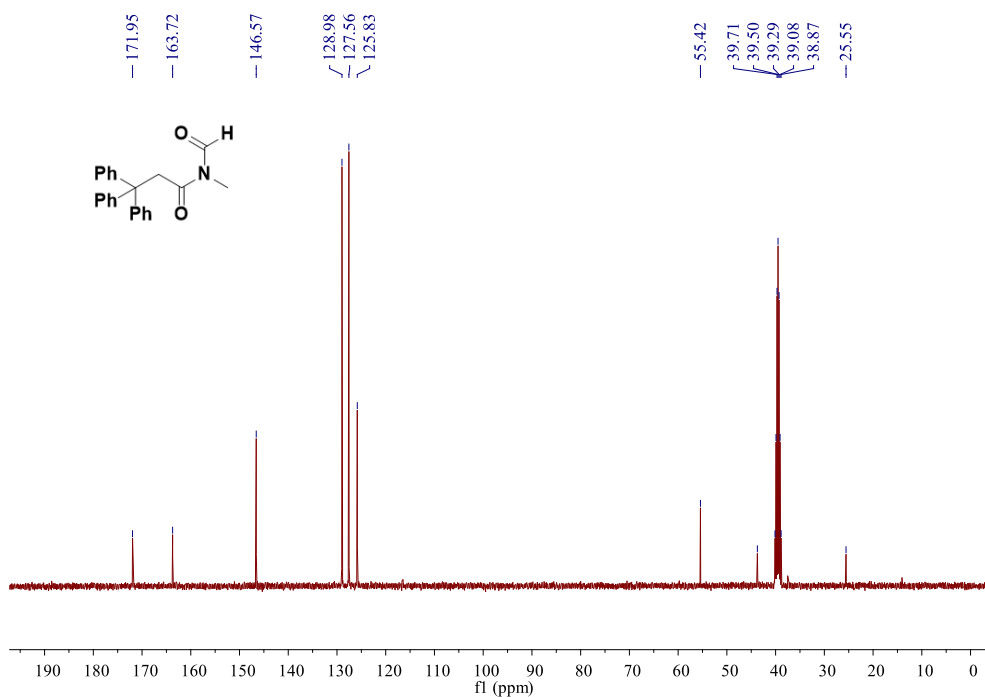

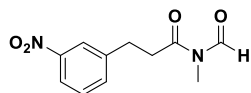

***N*-Formyl-*N*-Methyl-3-(3-Nitrophenyl)propenamide (2w)**

petroleum ether / ethyl acetate = 5:1, yellow solid, 55% yield (26.0 mg). mp: 49 – 51°C. <sup>1</sup>H NMR (400 MHz, DMSO-*d*<sub>6</sub>) δ 9.26 (s, 1H), 8.17 (t, *J* = 1.8 Hz, 1H), 8.07 – 8.05 (m, 1H), 7.76 (d, *J* = 7.7 Hz, 1H), 7.59 (t, *J* = 7.7 Hz, 1H), 3.20 (t, *J* = 7.4 Hz, 2H), 3.05 (t, *J* = 7.4 Hz, 2H), 2.94 (s, 3H). <sup>13</sup>C NMR (100 MHz, DMSO-*d*<sub>6</sub>) δ 173.94, 163.93, 147.77, 143.09, 135.52, 129.65, 123.18, 121.10, 34.57, 29.02, 25.74. HRMS (ESI-TOF): Anal Calcd. For. C<sub>11</sub>H<sub>12</sub>N<sub>2</sub>O<sub>4</sub>+Na<sup>+</sup>: 259.0689, Found: 259.0688. IR (neat, cm<sup>-1</sup>): ν 3091, 0949, 1737, 1674, 1522, 1417, 1345, 889, 780.

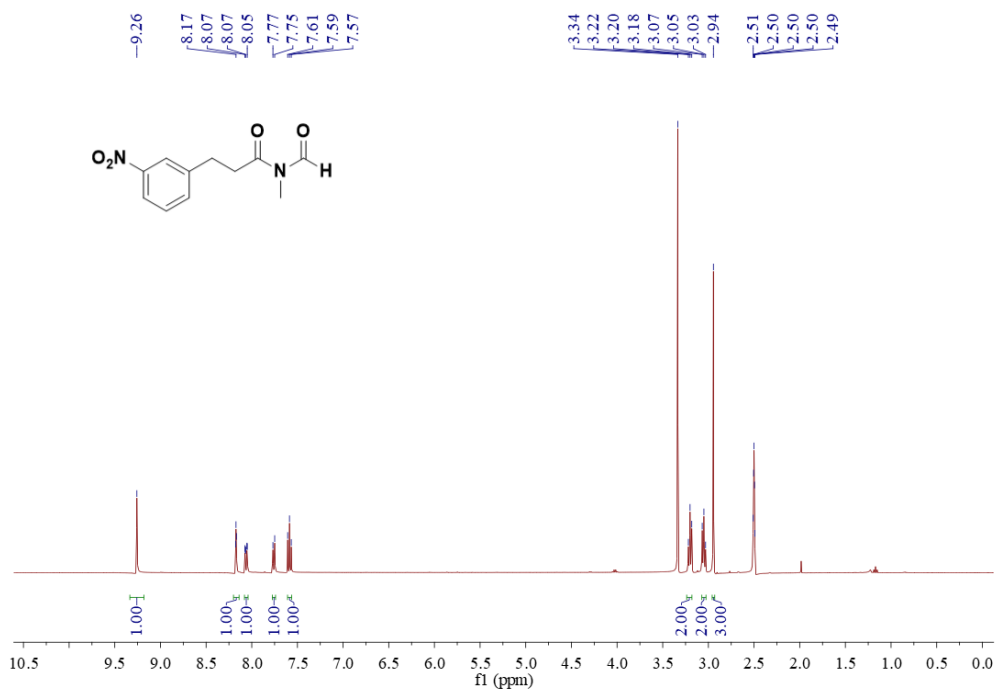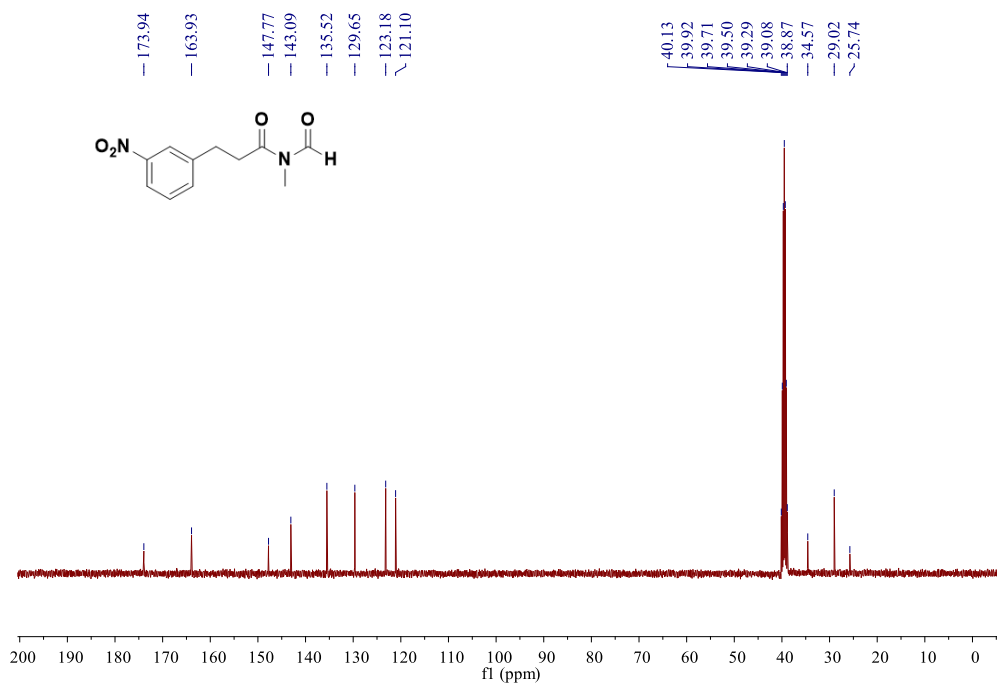

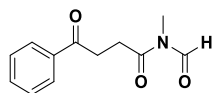

***N*-Formyl-*N*-Methyl-4-Oxo-4-Phenylbutanamide (2x)**

petroleum ether / ethyl acetate = 5:1, white solid, 54% yield (23.7 mg). mp: 76 – 78°C. <sup>1</sup>H NMR (400 MHz, DMSO-*d*<sub>6</sub>) δ 9.36 (s, 1H), 8.02 – 8.00 (m, 2H), 7.66 – 7.64 (m, 1H), 7.56 – 7.53 (m, 2H), 3.39 – 3.37 (m, 2H), 3.15 – 3.12 (m, 2H), 2.98 (s, 3H). <sup>13</sup>C NMR (100 MHz, DMSO-*d*<sub>6</sub>) δ 198.33, 174.19, 163.87, 136.36, 133.26, 128.72, 127.89, 32.48, 28.34, 25.89. HRMS (ESI-TOF): Anal Calcd. For. C<sub>12</sub>H<sub>13</sub>NO<sub>3</sub>+Na<sup>+</sup>: 242.0788, Found: 242.0794. IR (neat, cm<sup>-1</sup>): ν 3062, 1716, 1682, 1581, 1451, 1333, 800, 747.

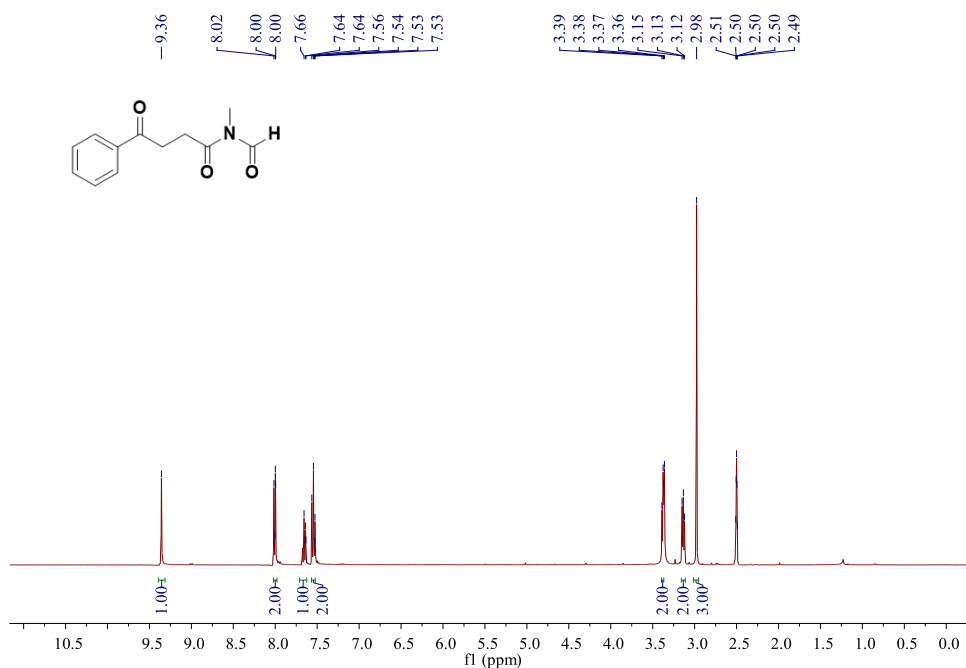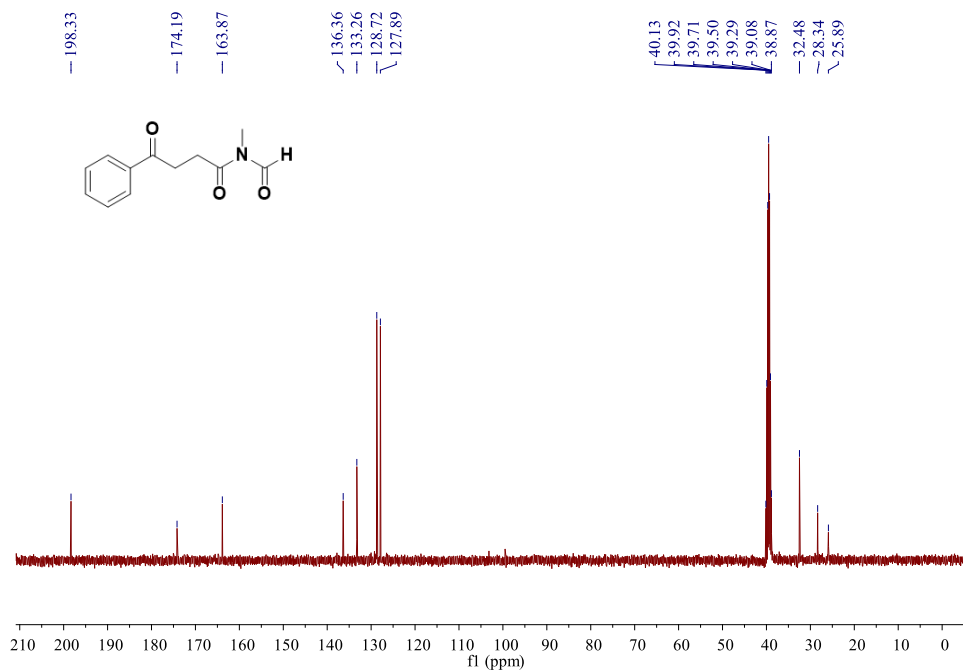

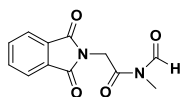

**2-(1,3-dioxoisindolin-2-yl)-N-Formyl-N-Methylacetamide (2y)**

petroleum ether / ethyl acetate = 5:1, white solid, 71% yield (34.9 mg). mp: 162 – 164°C. <sup>1</sup>H NMR (300 MHz, DMSO-*d*<sub>6</sub>) δ 9.28 (s, 1H), 8.09 – 7.85 (m, 4H), 5.05 (s, 2H), 3.01 (s, 3H). <sup>13</sup>C NMR (75 MHz, DMSO-*d*<sub>6</sub>) δ 169.07, 167.32, 163.56, 134.84, 131.44, 123.43, 26.13. HRMS (ESI-TOF): Anal Calcd. For. C<sub>12</sub>H<sub>10</sub>N<sub>2</sub>O<sub>4</sub>+Na<sup>+</sup>: 269.0540, Found: 269.0540. IR (neat, cm<sup>-1</sup>): ν 2946, 2852, 1707, 1671, 1396, 832, 714.

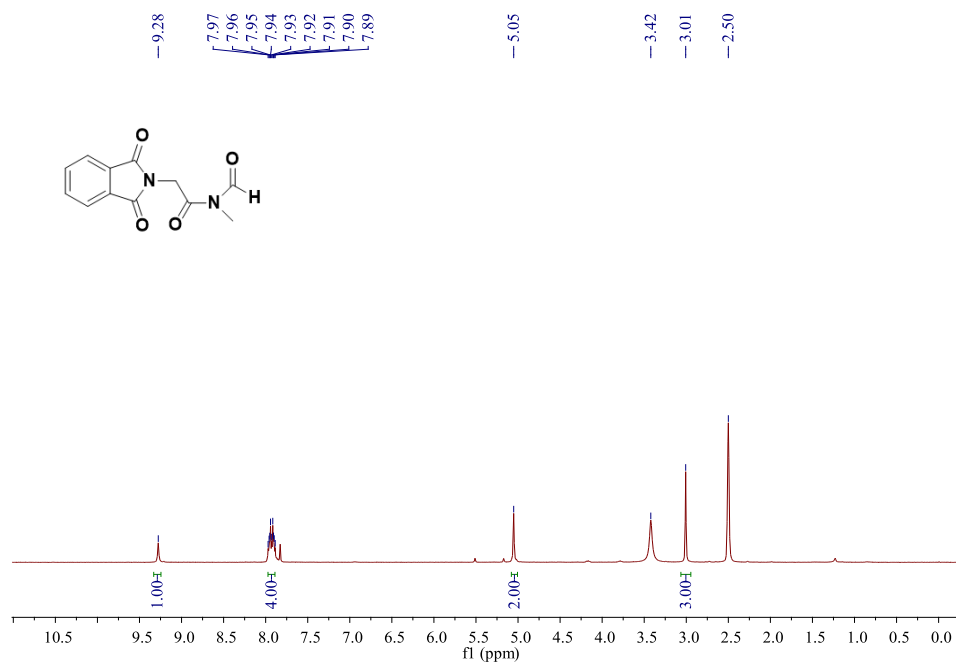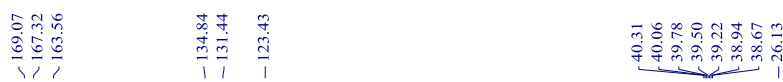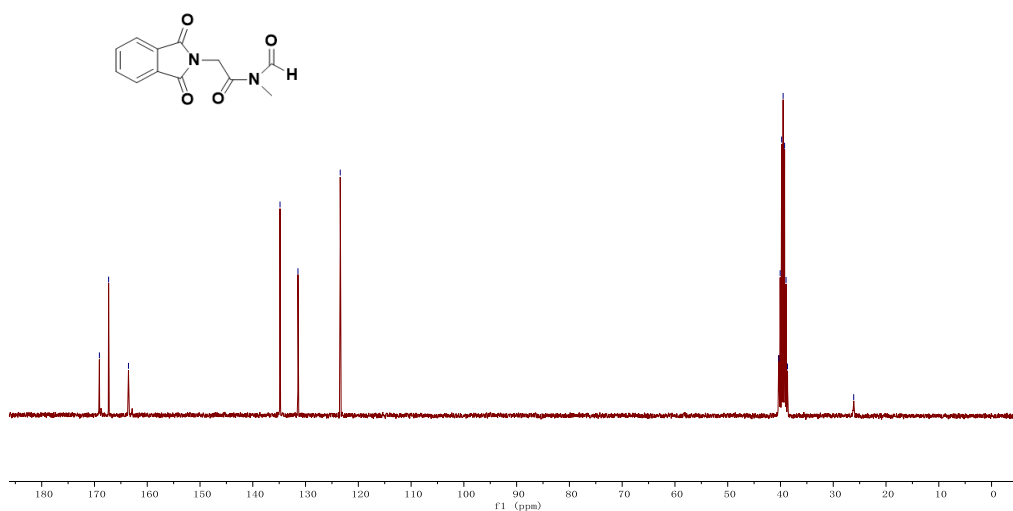

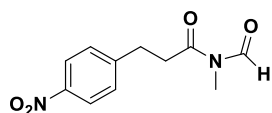

**N-Formyl-N-Methyl-3-(4-nitrophenyl)propanamide (2z)**

petroleum ether / ethyl acetate = 5:1, yellow solid, 70% yield (33.1 mg). mp: 70 – 72°C. <sup>1</sup>H NMR (400 MHz, DMSO-*d*6) δ 9.25 (s, 1H), 8.15 (d, *J* = 8.6 Hz, 2H), 7.56 (d, *J* = 8.6 Hz, 2H), 3.19 (t, *J* = 7.4 Hz, 2H), 3.04 (t, *J* = 7.4 Hz, 2H), 2.94 (s, 3H). <sup>13</sup>C NMR (100 MHz, DMSO-*d*6) δ 173.85, 163.88, 149.16, 145.96, 129.75, 123.32, 34.25, 29.29, 25.76. HRMS (ESI-TOF): Anal Calcd. For. C<sub>11</sub>H<sub>12</sub>N<sub>2</sub>O<sub>4</sub>+Na<sup>+</sup>: 259.0689, Found: 259.0693. IR (neat, cm<sup>-1</sup>): ν 3069, 2912, 1715, 1686, 1511, 1450, 1344, 798.

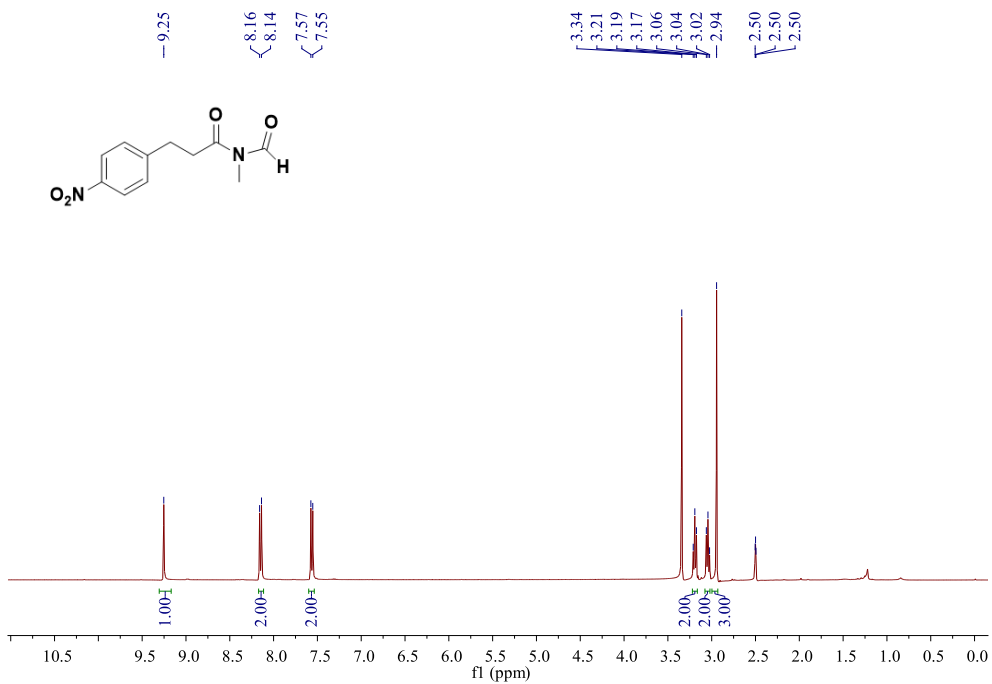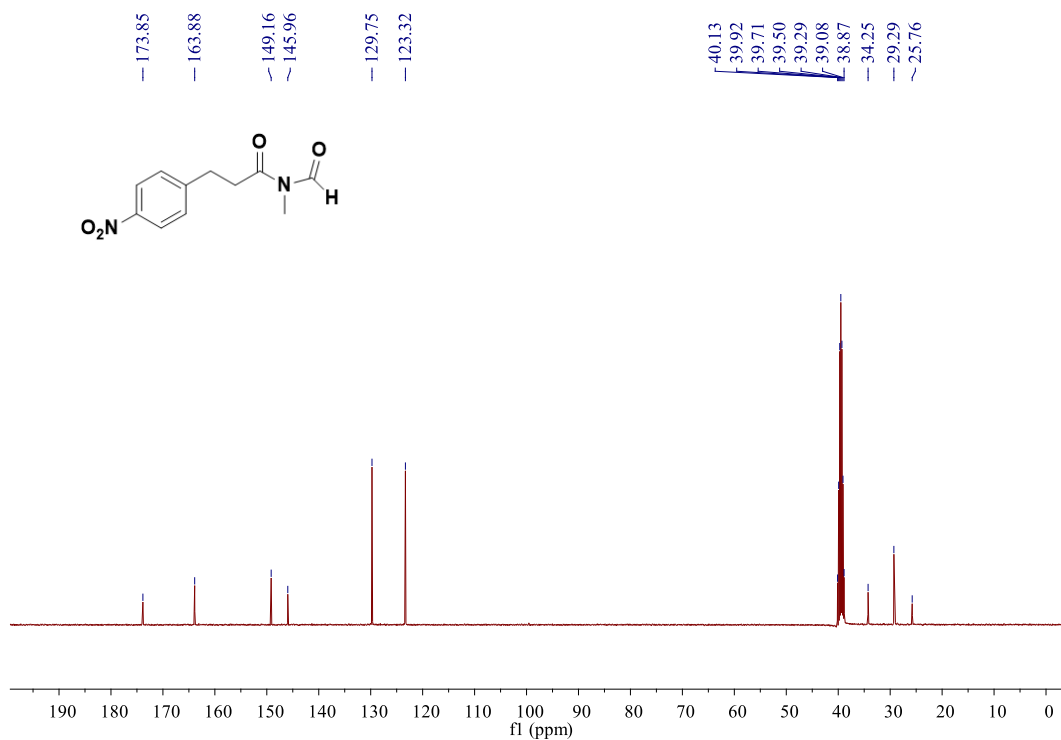



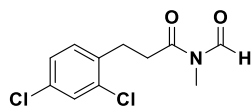

### 3-(2,4-Dichlorophenyl)-N-Formyl-N-Methylpropanamide (2aa)

petroleum ether / ethyl acetate = 5:1, colorless oil, 72% yield (37.3 mg).  $^1\text{H NMR}$  (400 MHz, DMSO-*d*<sub>6</sub>)  $\delta$  9.24 (s, 1H), 7.56 (d, *J* = 2.1 Hz, 1H), 7.44 (d, *J* = 8.3 Hz, 1H), 7.38 – 7.35 (m, 1H), 3.11 – 3.07 (m, 2H), 3.00 – 2.96 (m, 2H), 2.95 (s, 3H).  $^{13}\text{C NMR}$  (100 MHz, DMSO-*d*<sub>6</sub>)  $\delta$  173.78, 163.87, 137.06, 133.95, 131.92, 131.63, 128.52, 127.33, 33.23, 26.82, 25.78. **HRMS** (ESI-TOF): Anal Calcd. For.  $\text{C}_{11}\text{H}_{11}^{35}\text{Cl}_2\text{NO}_2+\text{Na}^+$ : 282.0059, Found: 282.0059. Anal Calcd. For.  $\text{C}_{11}\text{H}_{11}^{35,37}\text{Cl}_2\text{NO}_2+\text{Na}^+$ : 284.0030, Found: 284.0015. **IR** (neat,  $\text{cm}^{-1}$ ):  $\nu$  2934, 1735, 1641, 1587, 1472, 1344, 865, 748.

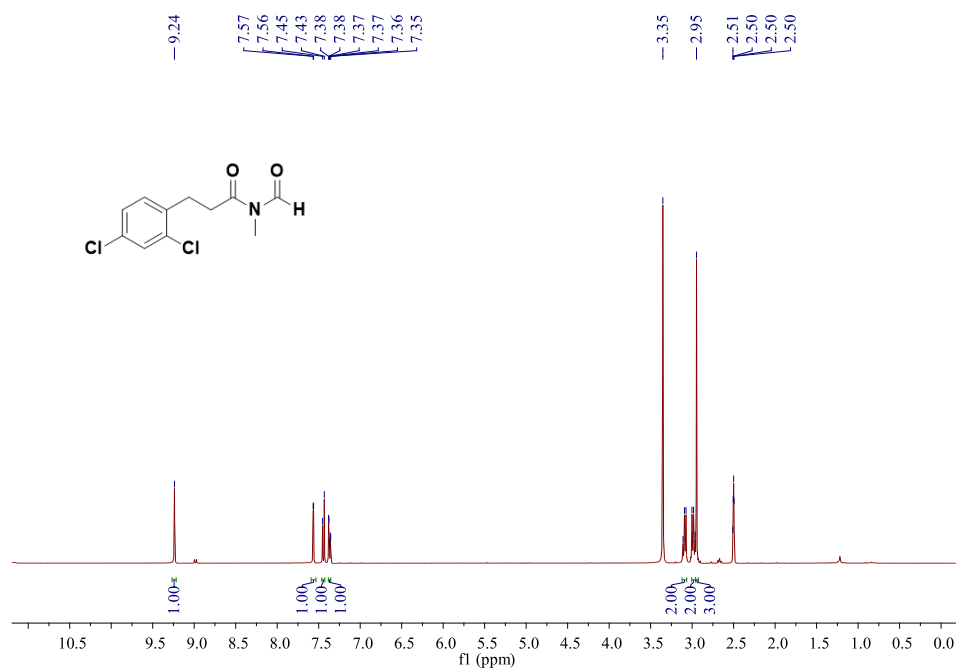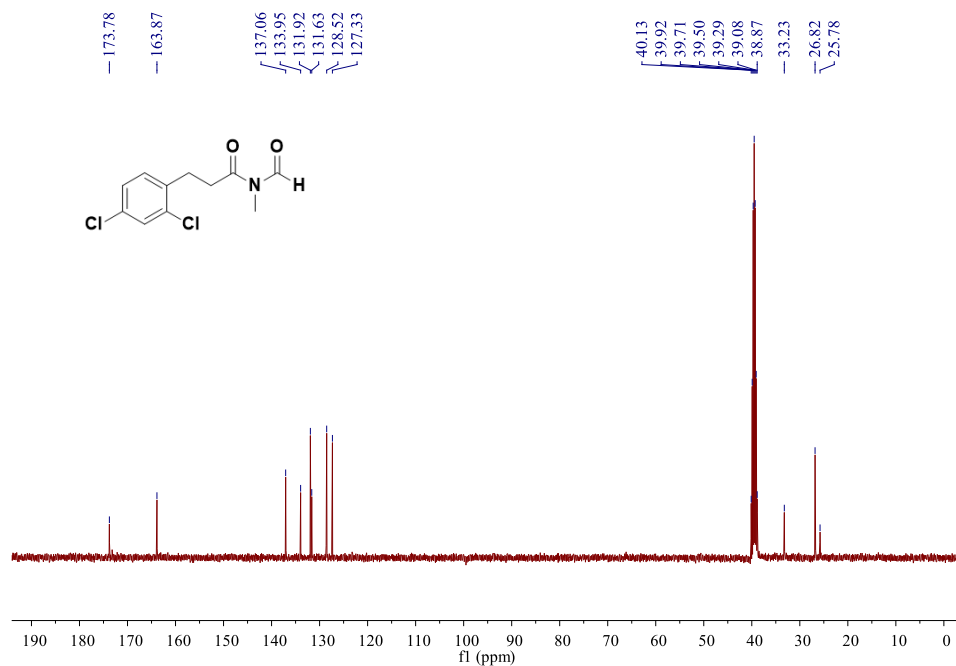

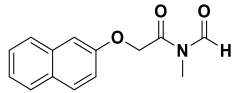

**N-Formyl-N-Methyl-2-(naphthalen-2-yloxy)acetamide (2ab)**

petroleum ether / ethyl acetate = 5:1, yellow solid, 35% yield (17.0 mg). mp: 79 – 80°C. <sup>1</sup>H NMR (400 MHz, CDCl<sub>3</sub>) δ 9.29 (s, 1H), 7.78 (d, *J* = 8.7 Hz, 2H), 7.74 (dd, *J* = 8.3, 1.1 Hz, 1H), 7.49 – 7.45 (m, 1H), 7.40 – 7.36 (m, 1H), 7.21 – 7.18 (m, 1H), 7.15 (d, *J* = 2.7 Hz, 1H), 5.05 (s, 2H), 3.18 (s, 3H). <sup>13</sup>C NMR (75 MHz, DMSO-*d*<sub>6</sub>) δ 170.34, 163.44, 155.58, 134.04, 129.33, 128.73, 127.53, 126.64, 126.48, 123.82, 118.34, 107.44, 66.16, 25.67. HRMS (ESI-TOF): Anal Calcd. For. C<sub>14</sub>H<sub>13</sub>NO<sub>3</sub>+Na<sup>+</sup>: 266.0788, Found: 266.0781. IR (neat, cm<sup>-1</sup>): ν 3057, 2919, 1729, 1680, 1509, 1469, 1253, 810, 744.

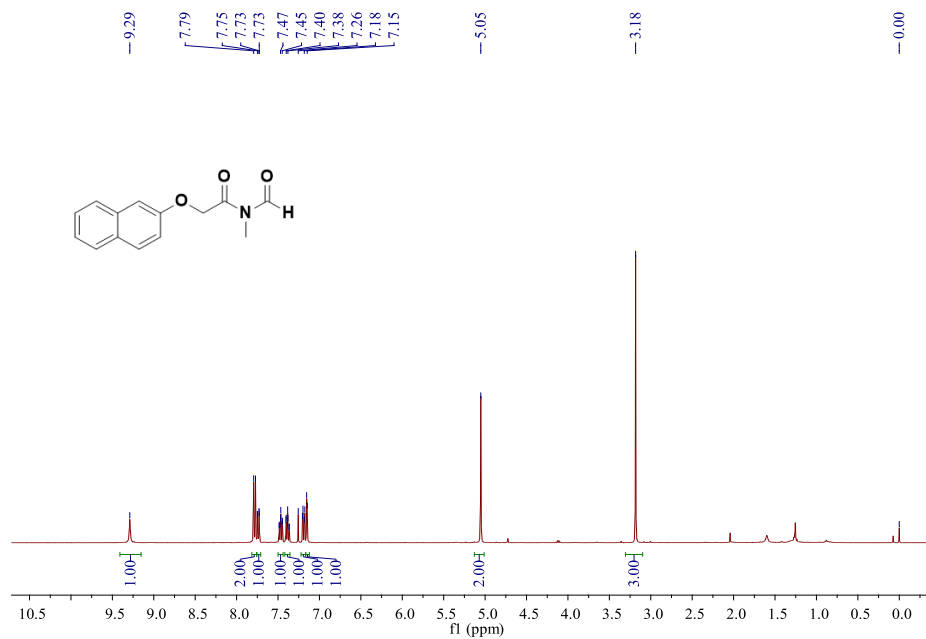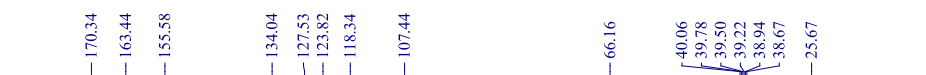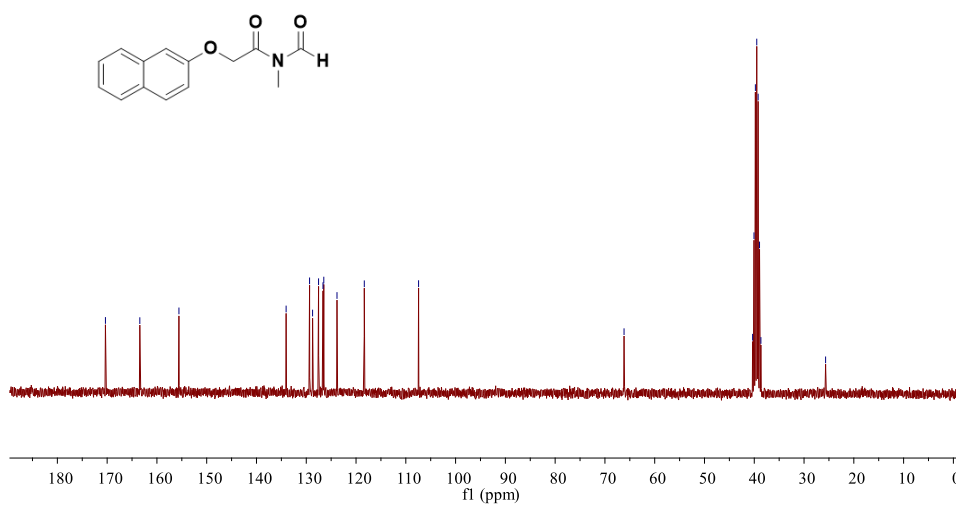

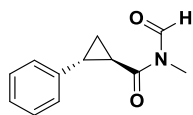

**(1R,2R)-N-Formyl-N-Methyl-2-Phenylcyclopropane-1-Carboxamide (2ac)**

petroleum ether / ethyl acetate = 5:1, white solid, 61% yield (24.8 mg). mp: 55 –57°C. <sup>1</sup>H NMR (400 MHz, DMSO-*d*<sub>6</sub>) δ 9.45 (d, *J* = 9.8 Hz, 1H), 7.31 – 7.27 (m, 2H), 7.24 – 7.19 (m, 3H), 3.01 (s, 3H), 2.74 – 2.71 (m, 1H), 2.59 – 2.56 (m, 1H), 1.63 – 1.59 (m, 1H), 1.47 – 1.42 (m, 1H). <sup>13</sup>C NMR (100 MHz, DMSO-*d*<sub>6</sub>) δ 173.84, 163.82, 139.71, 128.33, 126.41, 126.31, 26.66, 26.45, 23.47, 17.73. HRMS (ESI-TOF): Anal Calcd. For. C<sub>12</sub>H<sub>13</sub>NO<sub>2</sub>+Na<sup>+</sup>: 226.0838, Found: 226.0842. IR (neat, cm<sup>-1</sup>): ν 3062, 2927, 1771, 1626, 1496, 1319, 720, 699.

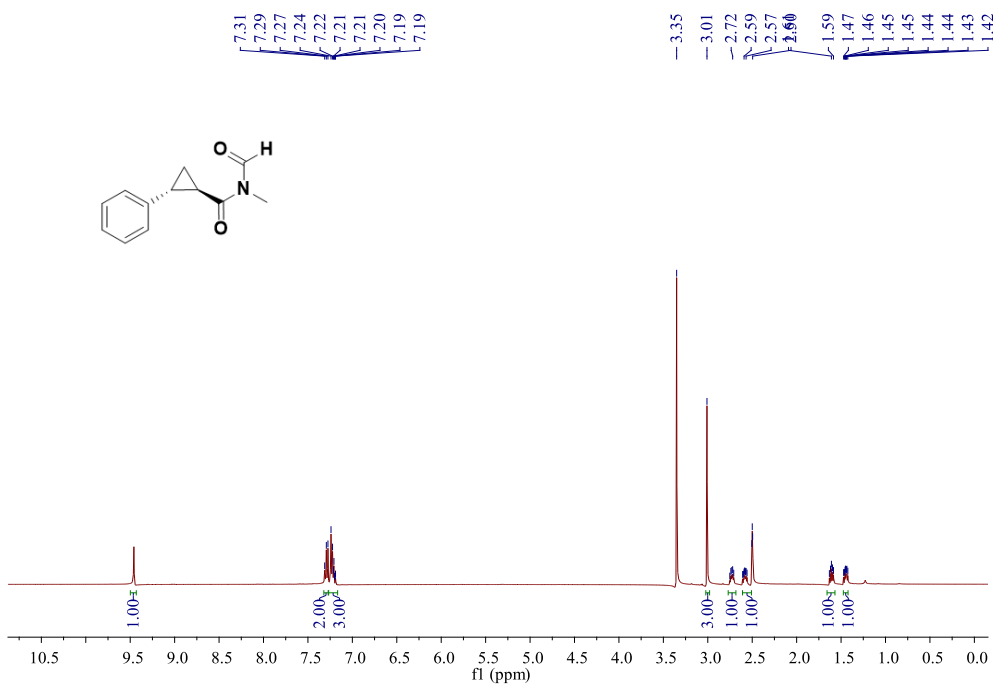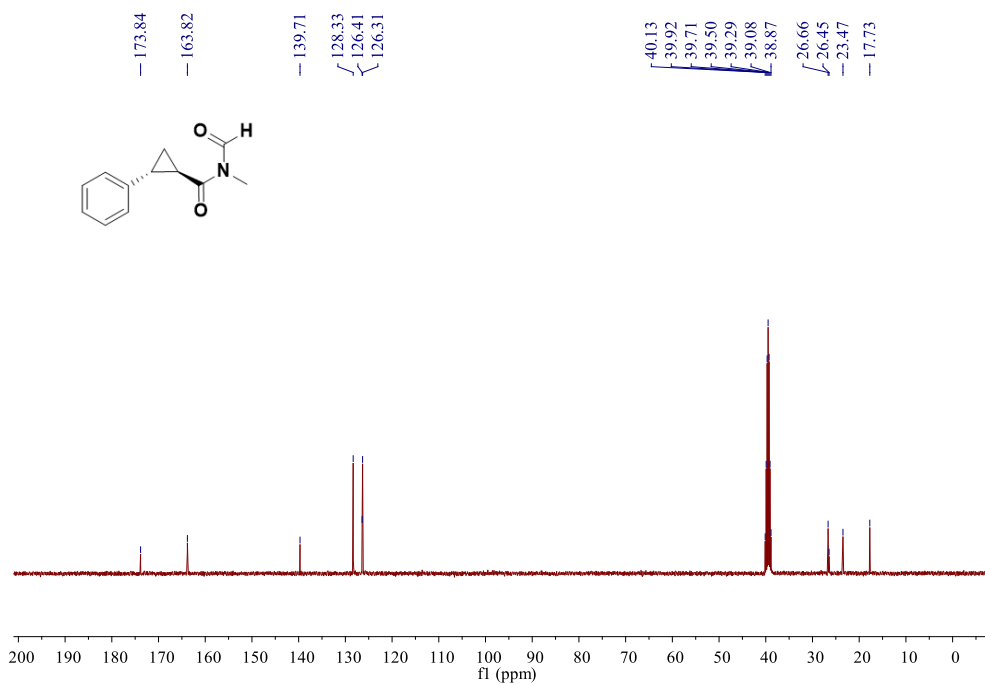

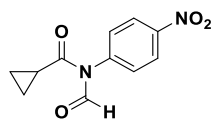

**N-Formyl-N-(4-nitrophenyl)cyclopropanecarboxamide (2ad)**

petroleum ether / ethyl acetate = 5:1, yellow solid, 63% yield (29.5 mg). mp: 76 – 77°C. <sup>1</sup>H NMR (300 MHz, DMSO-*d*<sub>6</sub>) δ 9.51 (s, 1H), 8.36 (d, *J* = 8.9 Hz, 2H), 7.64 (d, *J* = 8.9 Hz, 2H), 1.77 – 1.69 (m, 1H), 1.08 – 1.03 (m, 2H), 0.97 – 0.91 (m, 2H). <sup>13</sup>C NMR (75 MHz, DMSO-*d*<sub>6</sub>) δ 174.77, 162.80, 147.33, 141.52, 130.54, 124.55, 14.09, 10.30. HRMS (ESI-TOF): Anal Calcd. For. C<sub>11</sub>H<sub>10</sub>N<sub>2</sub>O<sub>4</sub>+Na<sup>+</sup>: 257.0533, Found: 257.0524. IR (neat, cm<sup>-1</sup>): ν 3085, 2942, 1730, 1654, 1557, 1447, 1358, 855, 799.

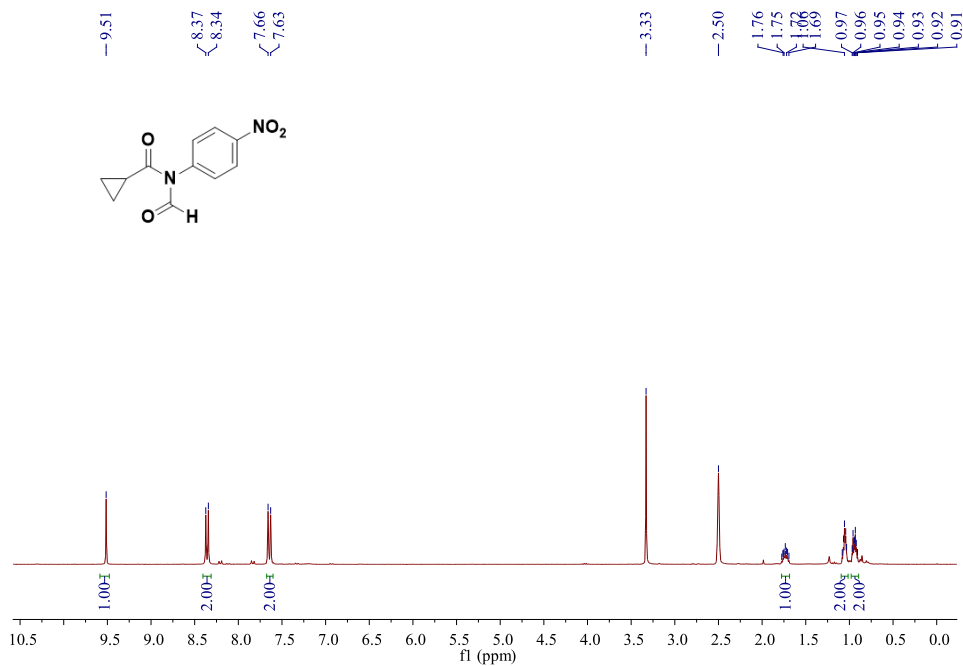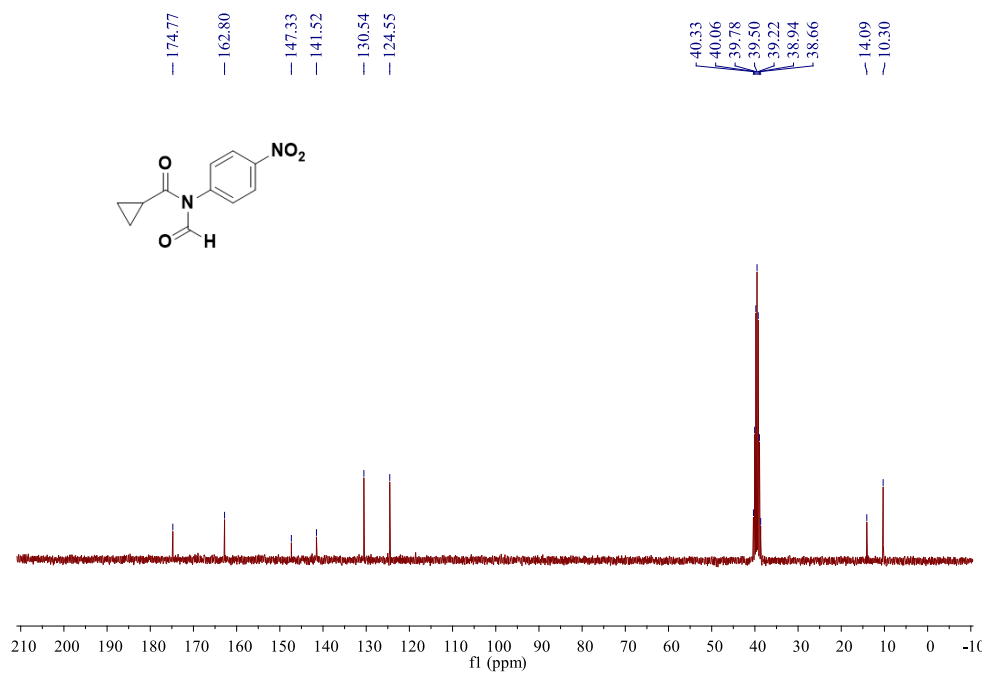

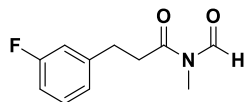

### 3-(3-Fluorophenyl)-N-Formyl-N-Methylpropanamide (2ae)

petroleum ether / ethyl acetate = 5:1, yellow oil, 50% yield (20.9 mg).  $^1\text{H NMR}$  (400 MHz, DMSO-*d*<sub>6</sub>)  $\delta$  9.26 (s, 1H), 7.35 – 7.29 (m, 1H), 7.15 – 7.10 (m, 2H), 7.03 – 6.99 (m, 1H), 3.13 (t, *J* = 7.6 Hz, 2H), 2.93 (t, *J* = 7.6 Hz, 2H), 2.95 (s, 3H).  $^{13}\text{C NMR}$  (100 MHz, DMSO-*d*<sub>6</sub>)  $\delta$  174.04, 163.89, 162.18 (d, *J* = 241.1 Hz), 143.57 (d, *J* = 7.4 Hz), 130.04 (d, *J* = 8.5 Hz), 124.56 (d, *J* = 2.2 Hz), 115.12 (d, *J* = 21.1 Hz), 112.73 (d, *J* = 20.9 Hz), 34.64, 29.17, 25.71.  $^{19}\text{F NMR}$  (377 MHz, DMSO-*d*<sub>6</sub>)  $\delta$  -113.80 (s, 1F). **HRMS** (ESI-TOF): Anal Calcd. For. C<sub>11</sub>H<sub>12</sub>FNO<sub>2</sub>+Na<sup>+</sup>: 232.0744, Found: 232.0722. **IR** (neat, cm<sup>-1</sup>):  $\nu$  3068, 2955, 1729, 1666, 1509, 1420, 1332, 893, 778.

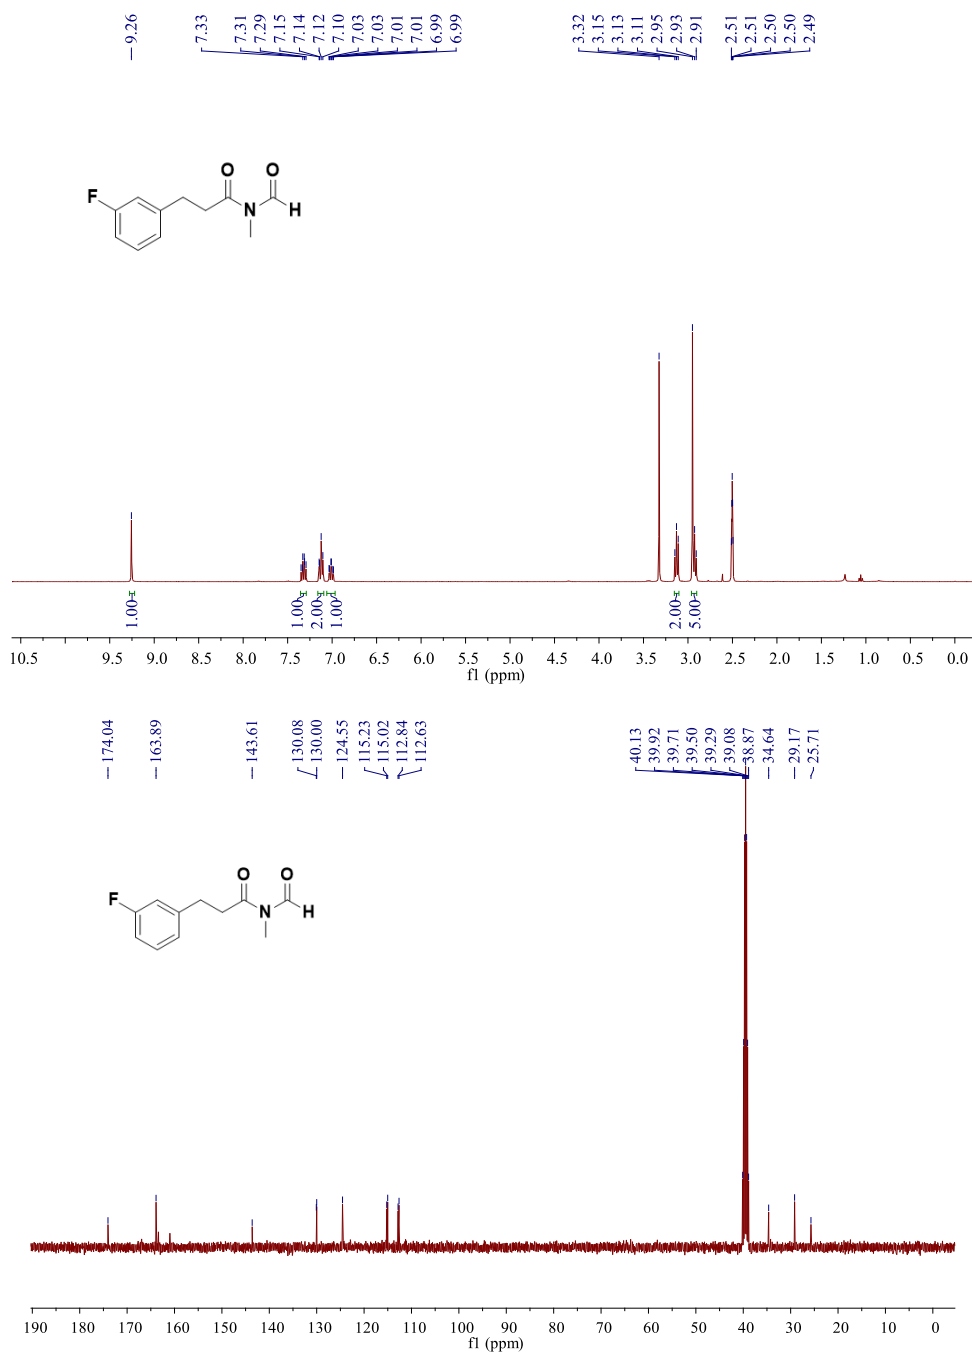

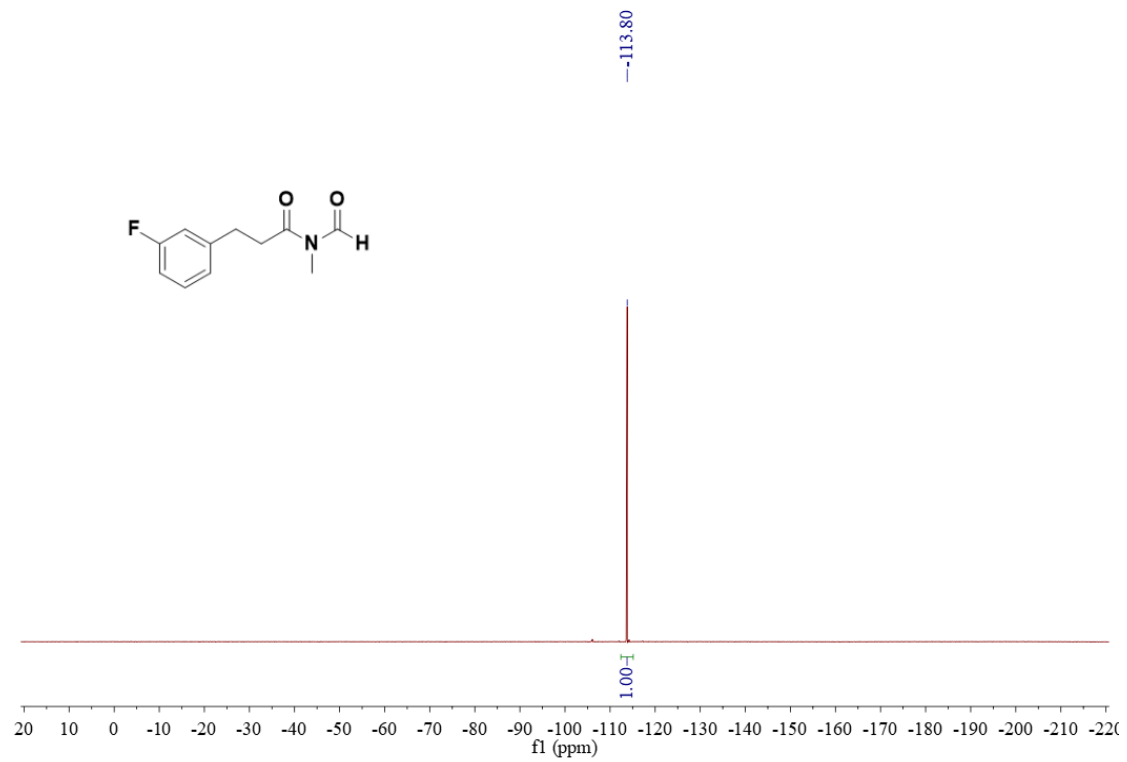

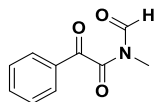

### *N*-Formyl-*N*-Methyl-2-Oxo-2-Phenylacetamide (2af)

petroleum ether / ethyl acetate = 5:1, yellow oil, 63% yield (24.1 mg).  $^1\text{H NMR}$  (400 MHz, DMSO-*d*<sub>6</sub>)  $\delta$  8.91 (s, 1H), 7.93 (d, *J* = 7.6 Hz, 2H), 7.80 – 7.76 (m, 1H), 7.64 – 7.60 (m, 2H), 3.18 (s, 3H).  $^{13}\text{C NMR}$  (75 MHz, CDCl<sub>3</sub>)  $\delta$  188.30, 169.00, 162.23, 135.72, 132.14, 129.90, 129.27, 26.29. **HRMS** (EI-TOF): Anal Calcd. For. C<sub>10</sub>H<sub>9</sub>NO<sub>3</sub>-CO: 163.0633, Found: 163.0634. **IR** (neat, cm<sup>-1</sup>):  $\nu$  3097, 2932, 1729, 1666, 1597, 1474, 1385, 723, 684.

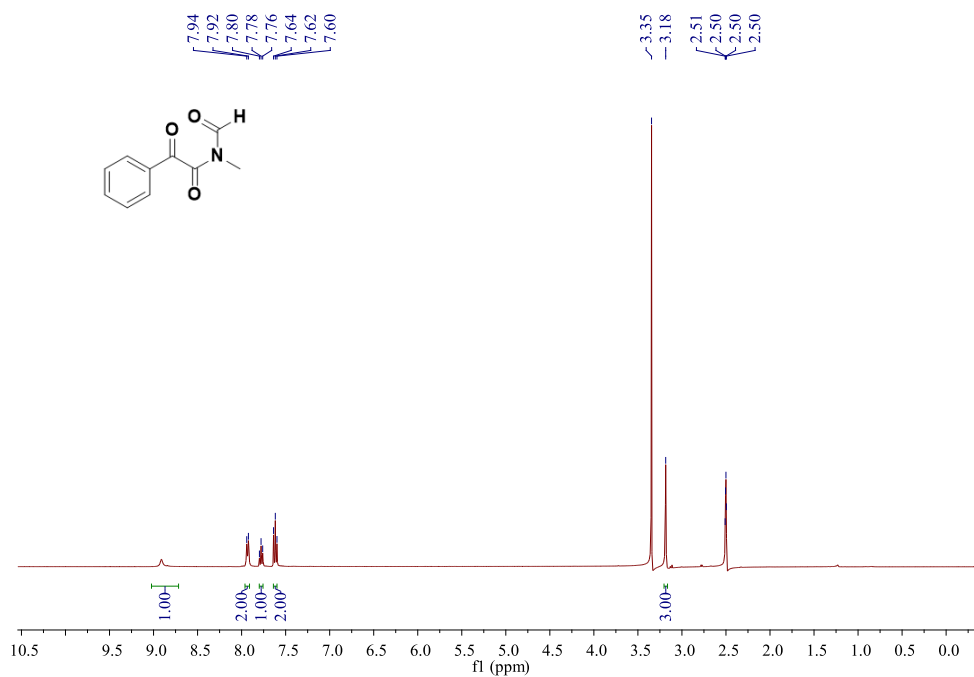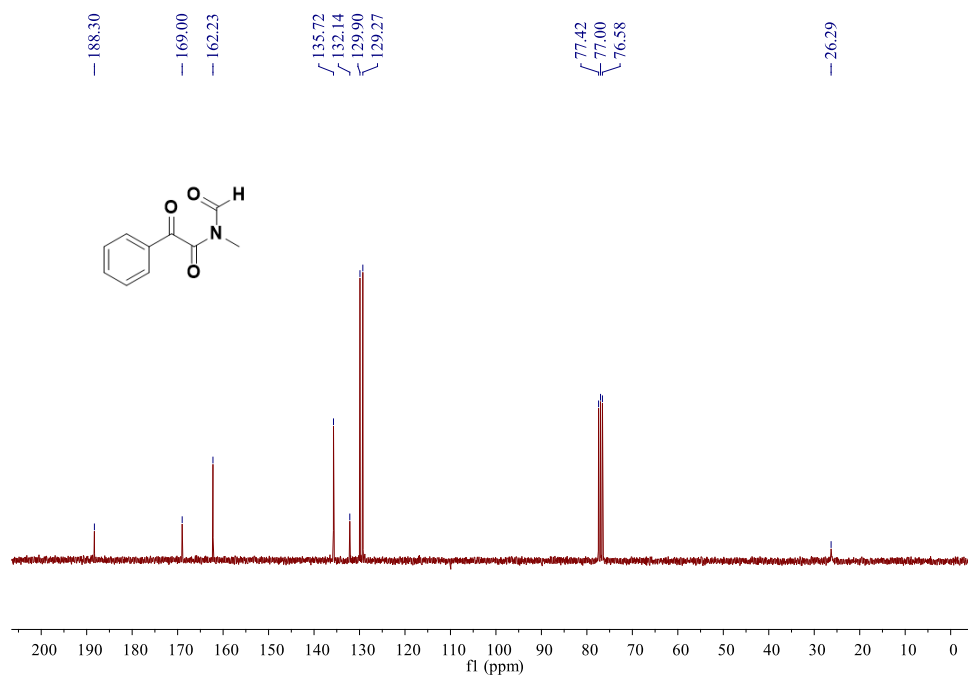

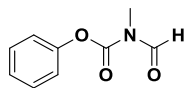

### Phenyl Formyl(methyl)carbamate (2ag)

petroleum ether / ethyl acetate = 5:1, white solid, 48% yield (17.2 mg). mp: 38 – 40°C.  $^1\text{H NMR}$  (300 MHz, DMSO-*d*<sub>6</sub>)  $\delta$  9.30 (s, 1H), 7.49 – 7.44 (m, 2H), 7.34 – 7.28 (m, 3H), 3.10 (s, 3H).  $^{13}\text{C NMR}$  (75 MHz, DMSO-*d*<sub>6</sub>)  $\delta$  163.13, 152.62, 150.07, 129.56, 126.35, 121.71, 27.31. **HRMS** (ESI-TOF): Anal Calcd. For. C<sub>8</sub>H<sub>8</sub>FNO<sub>3</sub>S+Na<sup>+</sup>: 202.0475, Found: 202.0473. **IR** (neat, cm<sup>-1</sup>):  $\nu$  3396, 2953, 2826, 1759, 1685, 1590, 1491, 1291, 862, 736.

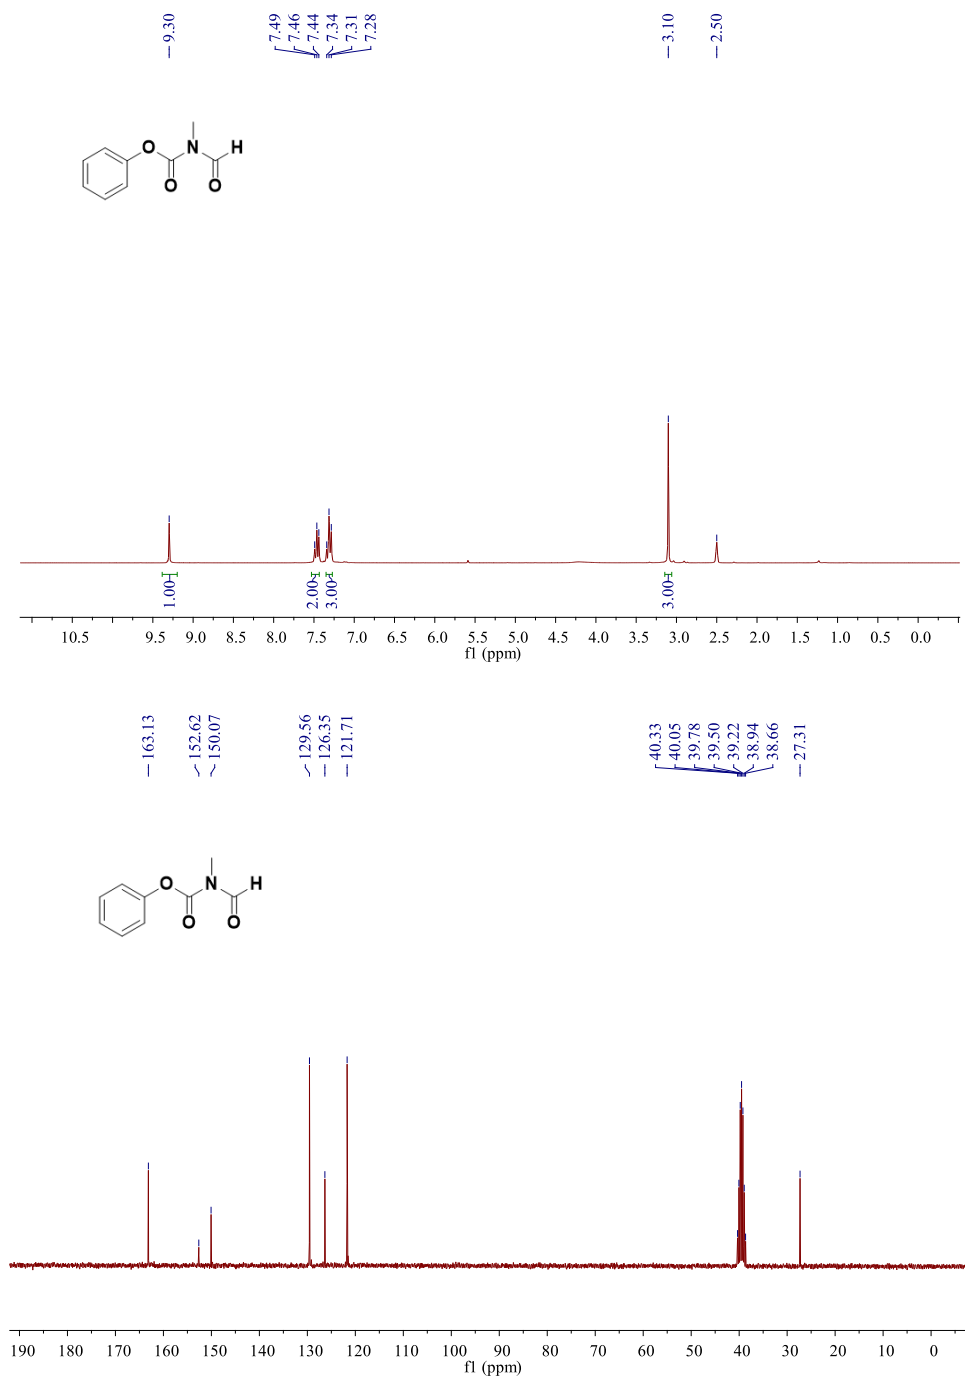



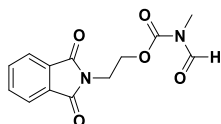

**2-(1,3-dioxoisindolin-2-yl)ethyl formyl(methyl)carbamate (2ah)**

petroleum ether / ethyl acetate = 5:1, white solid, 64% yield (35.3 mg). mp: 116 – 118°C. <sup>1</sup>H NMR (300 MHz, DMSO-*d*<sub>6</sub>) δ 9.01 (s, 1H), 7.88 – 7.81 (m, 4H), 4.38 (t, *J* = 5.1 Hz, 2H), 3.92 (t, *J* = 5.1 Hz, 2H), 2.87 (s, 3H). <sup>13</sup>C NMR (75 MHz, DMSO-*d*<sub>6</sub>) δ 167.83, 162.97, 153.64, 134.42, 131.60, 123.08, 64.35, 36.48, 26.78. HRMS (ESI-TOF): Anal Calcd. For. C<sub>13</sub>H<sub>12</sub>N<sub>2</sub>O<sub>5</sub>+Na<sup>+</sup>: 299.0638, Found: 299.0647. IR (neat, cm<sup>-1</sup>): ν 2979, 1771, 1650, 1497, 1392, 1262, 791.

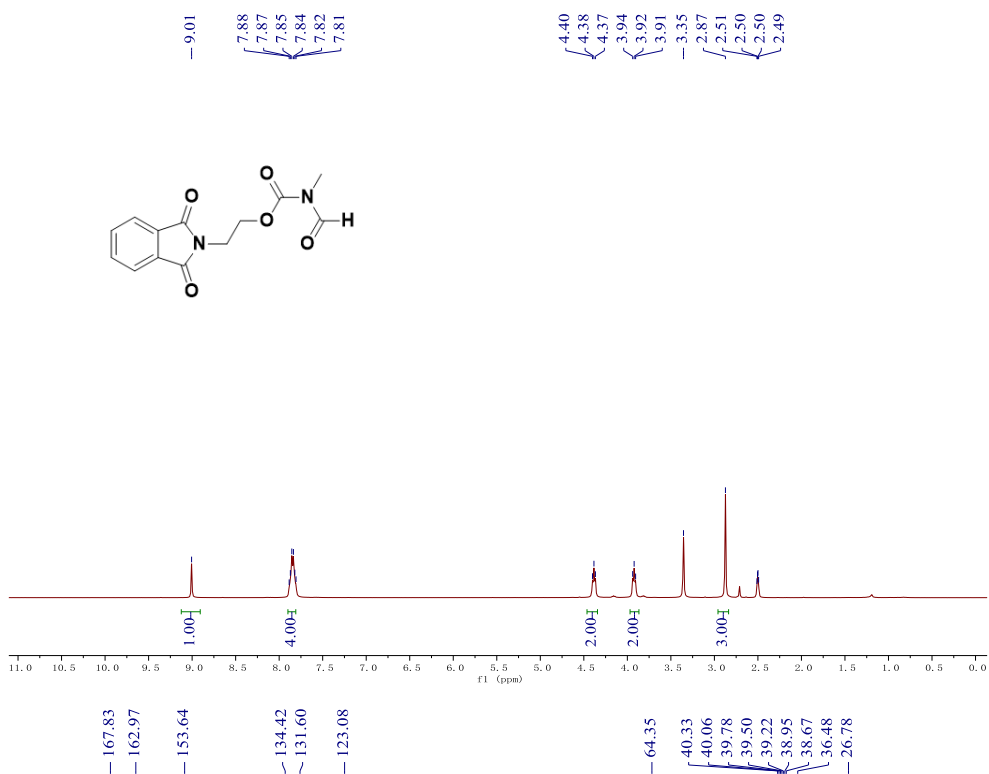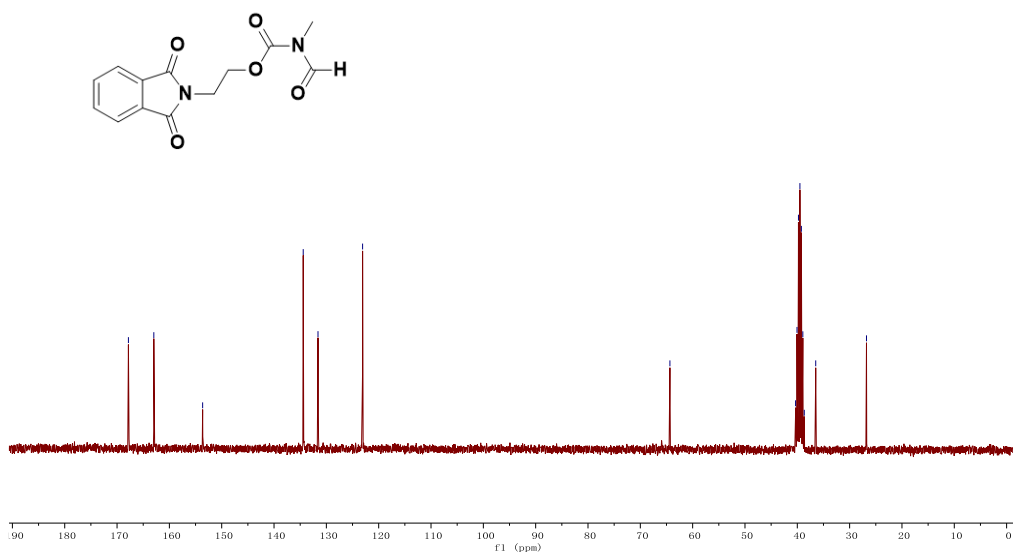

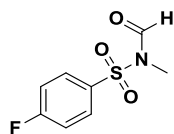

***N*-((4-fluorophenyl)sulfonyl)-*N*-Methylformamide (2ai)**

petroleum ether / ethyl acetate = 5:1, white solid, 74% yield (36.4 mg). mp: 88 – 90°C.  $^1\text{H NMR}$  (400 MHz, DMSO-*d*<sub>6</sub>)  $\delta$  9.07 (d,  $J$  = 12.2 Hz, 1H), 8.13 – 8.09 (m, 2H), 7.57 – 7.49 (m, 2H), 2.90 (s, 3H).  $^{13}\text{C NMR}$  (100 MHz, DMSO-*d*<sub>6</sub>)  $\delta$  165.40 (d,  $J$  = 254.3 Hz), 161.55, 132.85 (d,  $J$  = 3.0 Hz), 130.87 (d,  $J$  = 10.1 Hz), 117.28 (d,  $J$  = 23.1 Hz), 27.63.  $^{19}\text{F NMR}$  (377 MHz, DMSO-*d*<sub>6</sub>)  $\delta$  -103.19 (s, 1F). **HRMS** (ESI-TOF): Anal Calcd. For. C<sub>8</sub>H<sub>8</sub>FNO<sub>3</sub>S+Na<sup>+</sup>: 240.0101, Found: 240.0101. **IR** (neat, cm<sup>-1</sup>):  $\nu$  3103, 1687, 1588, 1493, 1351, 836, 779.

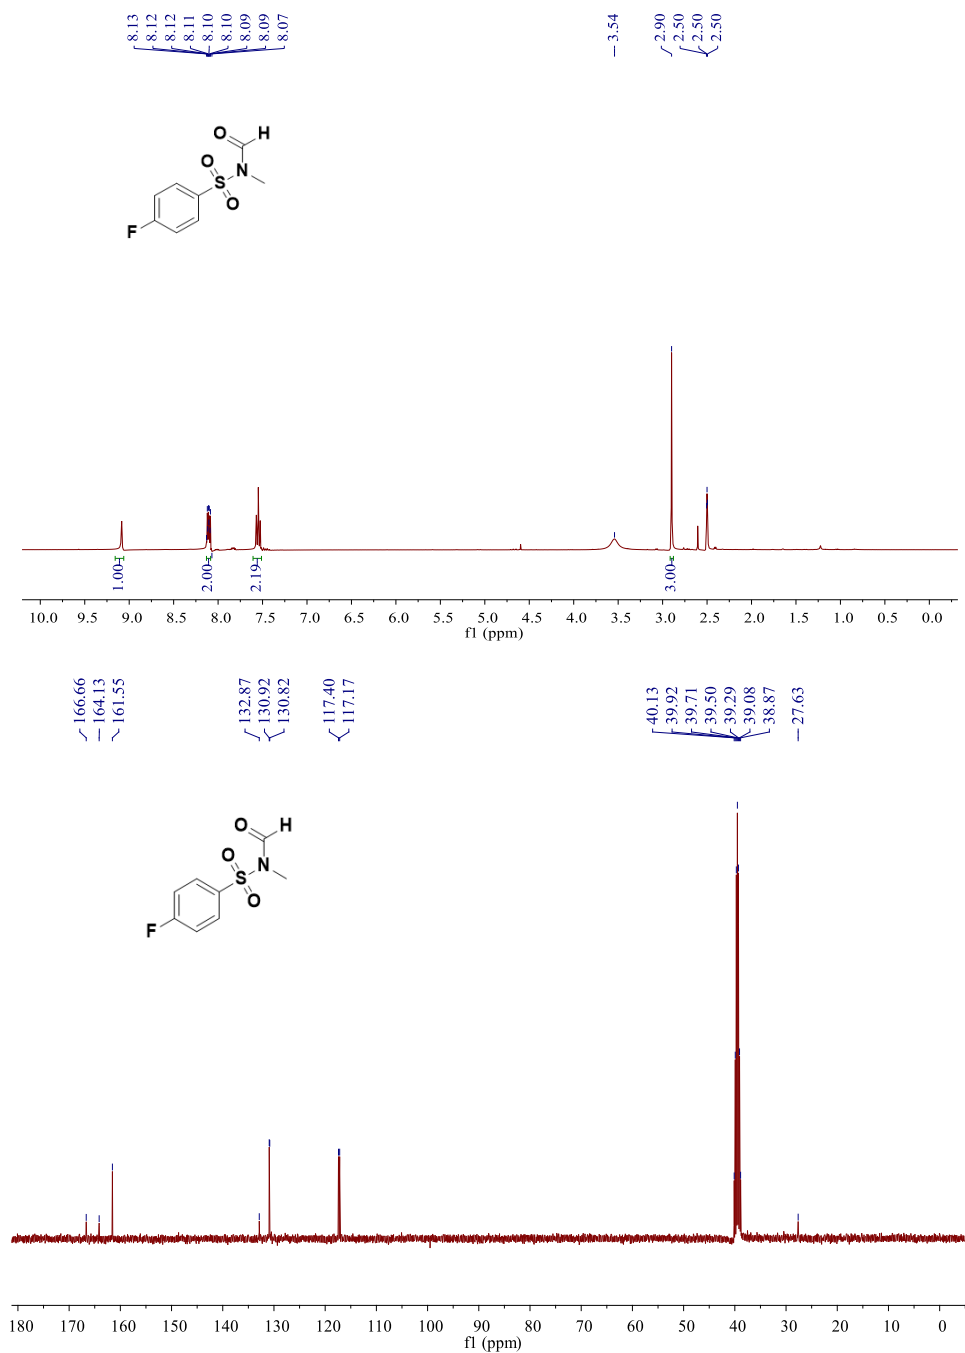

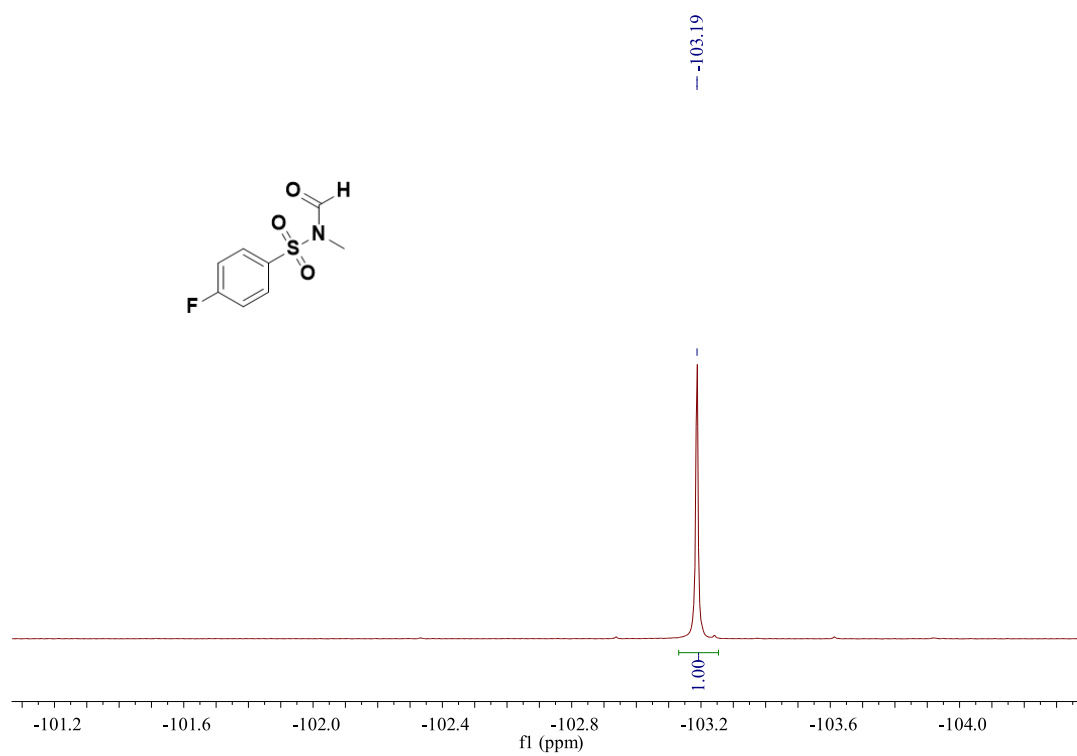

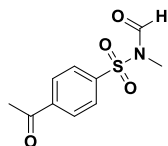

***N*-((4-Acetylphenyl)sulfonyl)-*N*-Methylformamide (2aj)**

petroleum ether / ethyl acetate = 5:1, white solid, 36% yield (17.4 mg). mp: 90 – 92°C. <sup>1</sup>H NMR (400 MHz, DMSO-*d*<sub>6</sub>) δ 9.11 (s, 1H), 8.21 – 8.14 (m, 4H), 2.92 (s, 3H), 2.66 (s, 3H). <sup>13</sup>C NMR (100 MHz, DMSO-*d*<sub>6</sub>) δ 197.24, 161.56, 141.01, 139.92, 129.52, 127.87, 27.77, 27.13. HRMS (ESI-TOF): Anal Calcd. For. C<sub>8</sub>H<sub>8</sub>N<sub>2</sub>O<sub>5</sub>S+Na<sup>+</sup>: 264.0301, Found: 264.0292. IR (neat, cm<sup>-1</sup>): ν 3098, 2852, 1771, 1694, 1596, 1417, 1362, 836, 771.

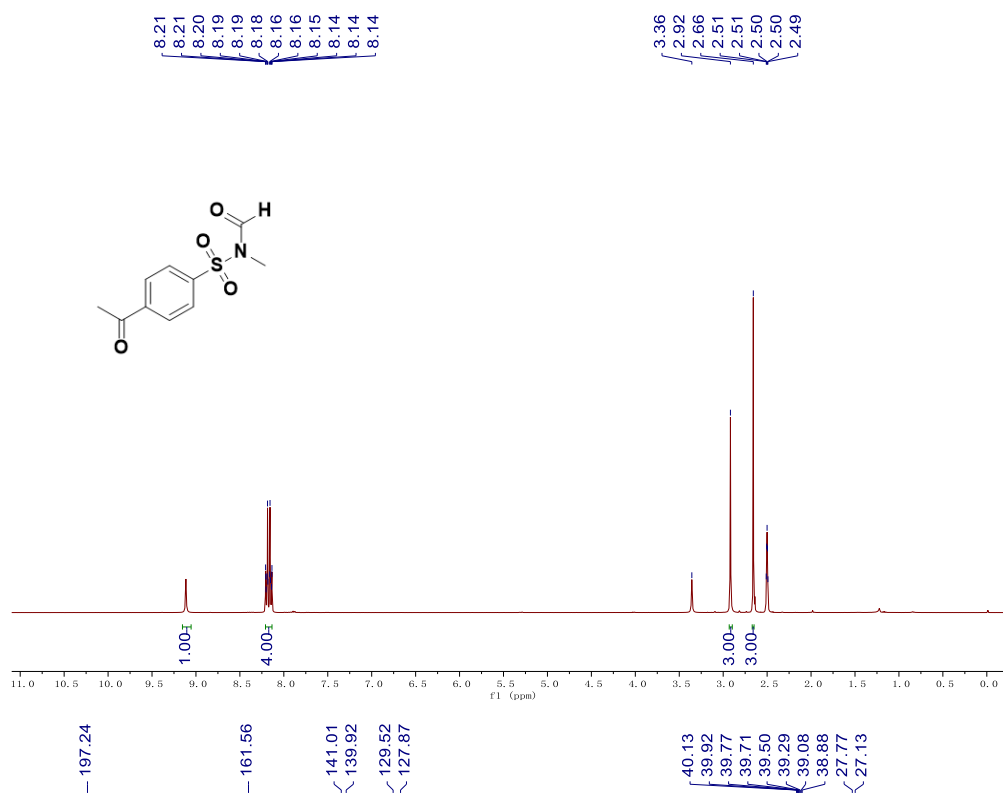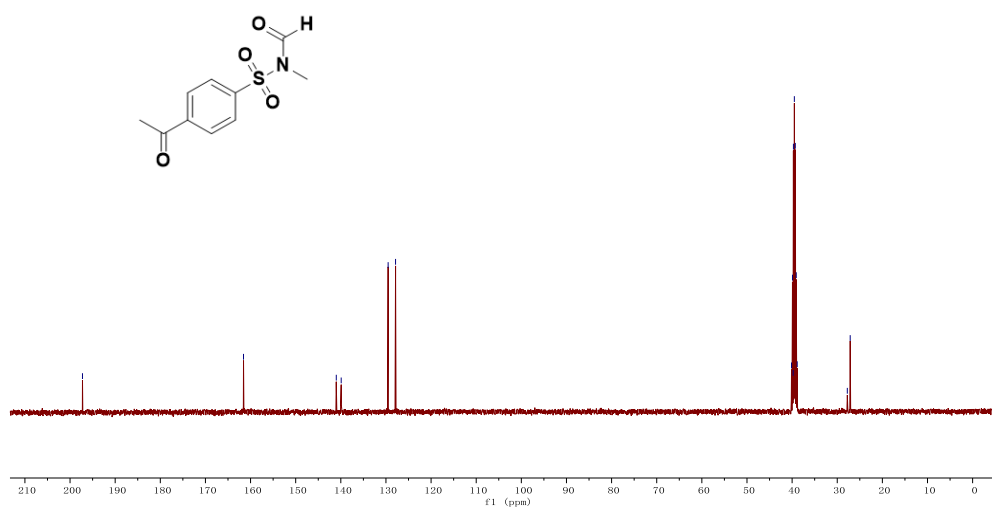

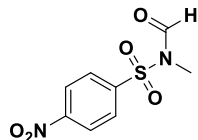

***N*-Methyl-*N*-((4-Nitrophenyl)sulfonyl)formamide (2ak)**

petroleum ether / ethyl acetate = 5:1, white solid, 50% yield (32.6 mg). mp: 100 – 102°C. <sup>1</sup>H NMR (400 MHz, DMSO-*d*<sub>6</sub>) δ 9.11 (s, 1H), 8.47 – 8.45 (m, 2H), 8.30 – 8.27 (m, 2H), 2.94 (s, 3H). <sup>13</sup>C NMR (100 MHz, DMSO-*d*<sub>6</sub>) δ 161.56, 150.83, 141.69, 129.31, 125.14, 27.93. HRMS (ESI-TOF): Anal Calcd. For. C<sub>8</sub>H<sub>8</sub>N<sub>2</sub>O<sub>5</sub>S+Na<sup>+</sup>: 267.0046, Found: 267.0045. IR (neat, cm<sup>-1</sup>): ν 3105, 2959, 1774, 1606, 1530, 1458, 1349, 854, 755.

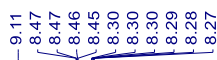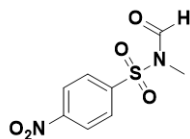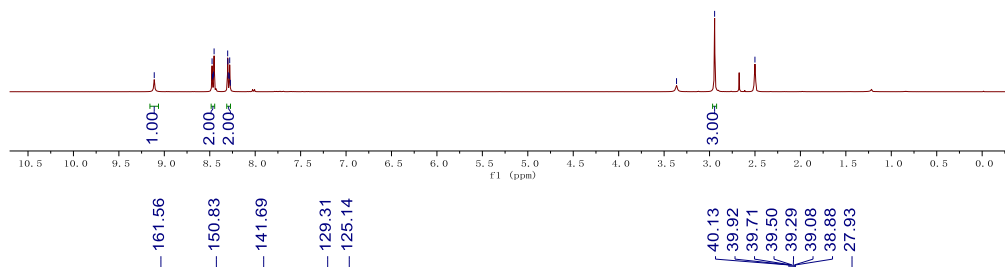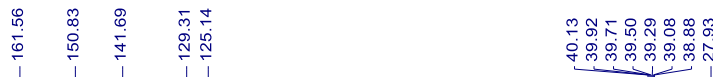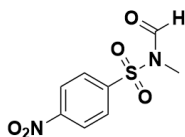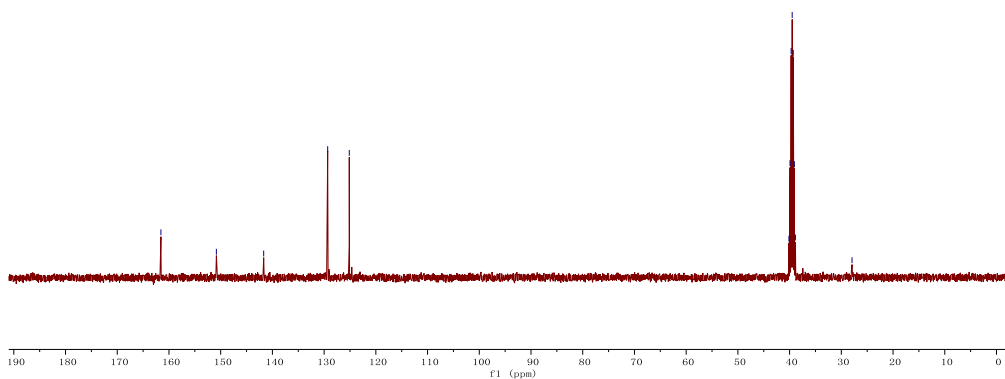

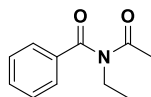

***N*-acetyl-*N*-ethylbenzamide (2a)**

petroleum ether / ethyl acetate = 5:1, yellow oil, 35% yield (13.5 mg).  $^1\text{H NMR}$  (400 MHz,  $\text{DMSO-}d_6$ )  $\delta$  7.62 – 7.57 (m, 3H), 7.52 – 7.48 (m, 2H), 3.69 (q,  $J = 7.0$  Hz, 2H), 2.13 (s, 3H), 1.09 (t,  $J = 7.1$  Hz, 3H).  $^{13}\text{C NMR}$  (100 MHz,  $\text{DMSO-}d_6$ )  $\delta$  173.86, 172.72, 135.95, 131.91, 128.64, 127.90, 40.69, 25.52, 13.96. **HRMS** (ESI-TOF): Anal Calcd. For.  $\text{C}_{11}\text{H}_{13}\text{NO}_2 + \text{Na}^+$ : 214.0838, Found: 214.0840. **IR** (neat,  $\text{cm}^{-1}$ ):  $\nu$  3211, 2984, 1736, 1673, 1530, 1480, 1234, 847, 711.

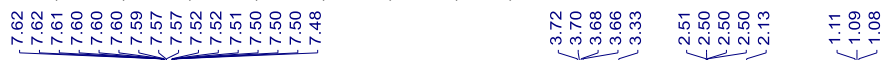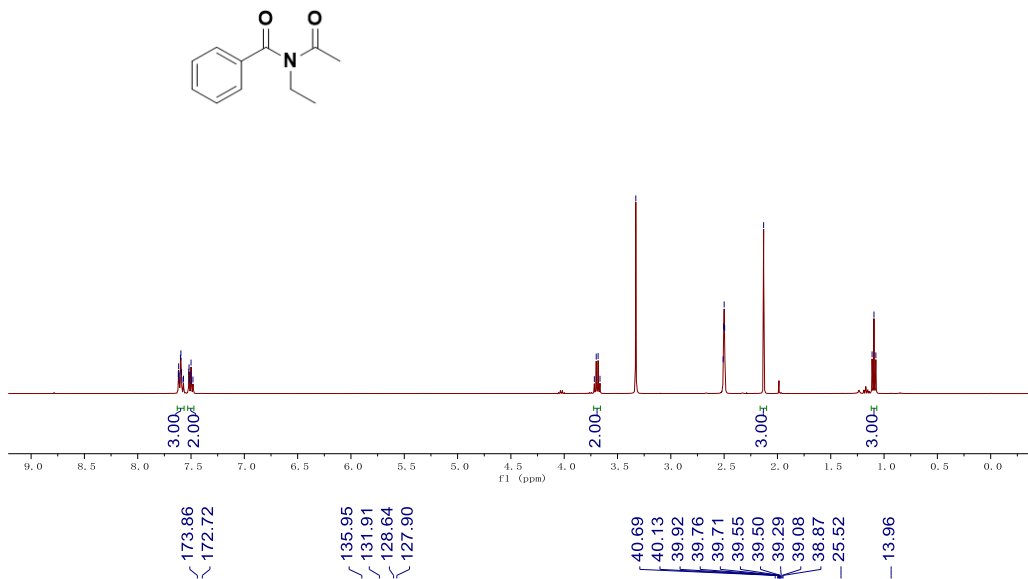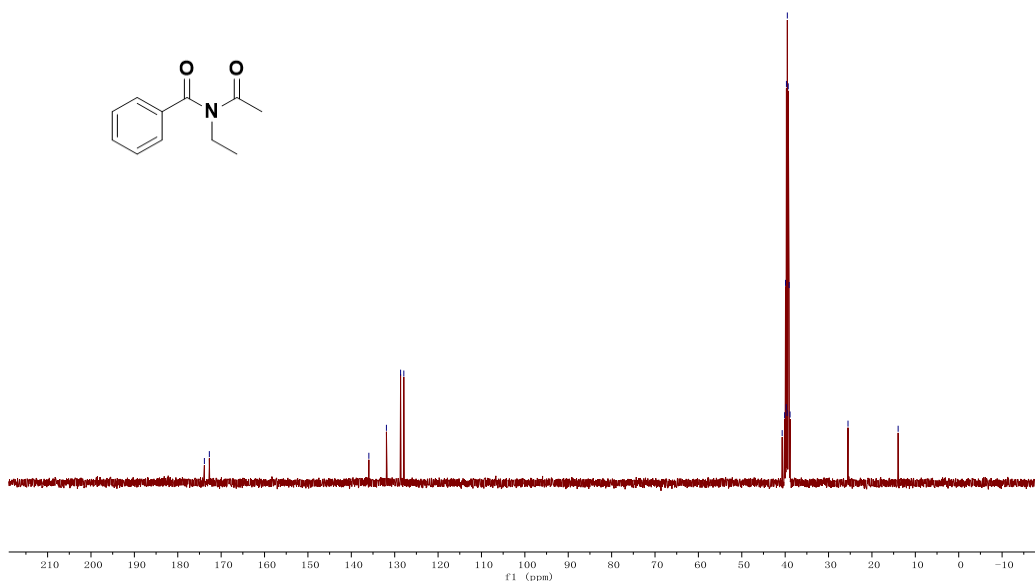

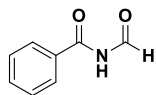

### **N-Formylbenzamide (2ba)**

petroleum ether / ethyl acetate = 5:1, white solid, 94% yield (28.0 mg). mp: 106 – 108°C. <sup>1</sup>H NMR (400 MHz, DMSO-*d*<sub>6</sub>) δ 11.73 (d, *J* = 7.7 Hz, 1H), 9.27 (d, *J* = 8.9 Hz, 1H), 8.03 – 8.01 (m, 2H), 7.69 – 7.65 (m, 1H), 7.56 – 7.53 (m, 2H). <sup>13</sup>C NMR (100 MHz, DMSO-*d*<sub>6</sub>) δ 167.50, 164.46, 133.46, 131.50, 128.69, 128.40. HRMS (ESI-TOF): Anal Calcd. For. C<sub>8</sub>H<sub>7</sub>NO<sub>2</sub>+Na<sup>+</sup>: 172.0369, Found: 172.0378. IR (neat, cm<sup>-1</sup>): ν 3265, 2923, 1720, 1684, 1457, 1363, 885, 697.

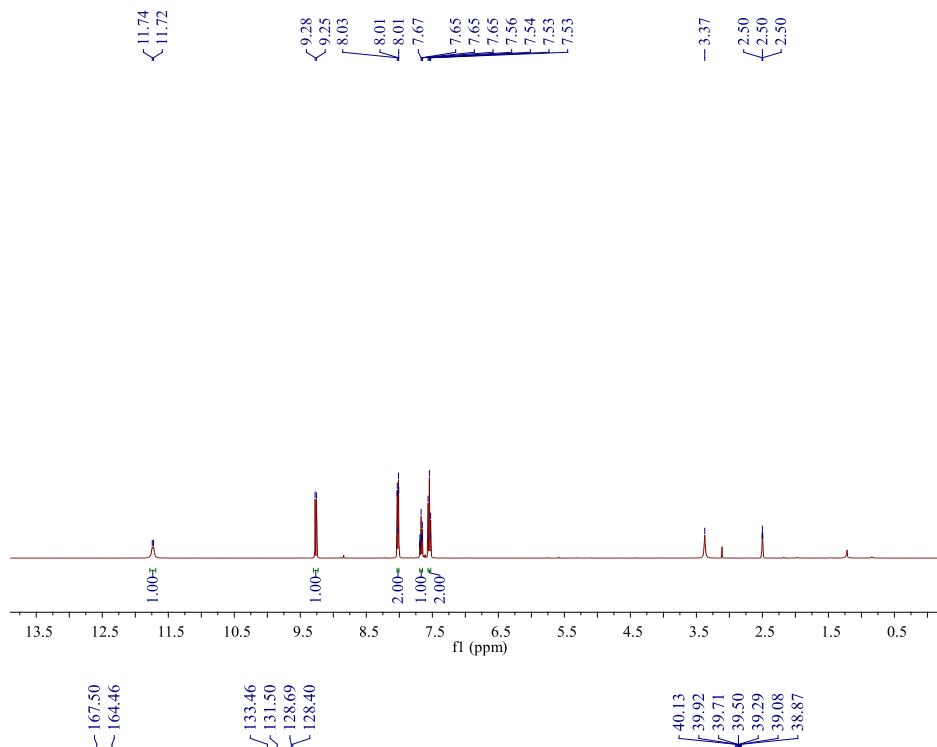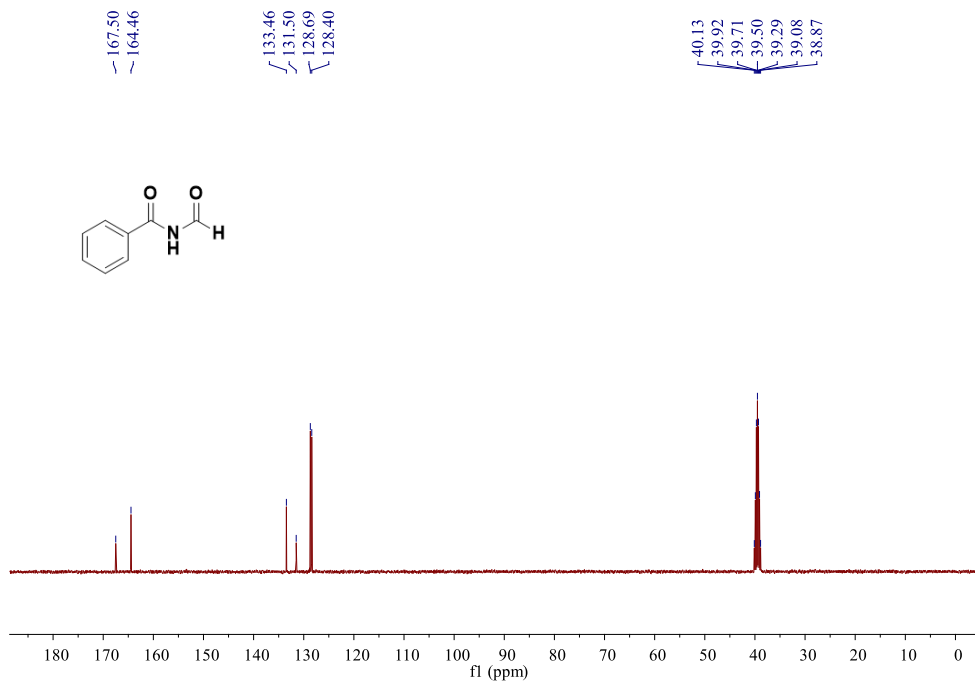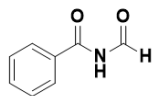

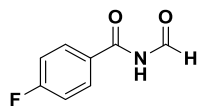

#### 4-Fluoro-N-Formylbenzamide (2bb)

petroleum ether / ethyl acetate = 5:1, white solid, 78% yield (26.1 mg). mp: 161 – 163°C. <sup>1</sup>H NMR (400 MHz, DMSO-*d*<sub>6</sub>) δ 11.75 (d, *J* = 8.2 Hz, 1H), 9.25 (d, *J* = 8.9 Hz, 1H), 8.13 – 8.08 (m, 2H), 7.42 – 7.36 (m, 2H). <sup>13</sup>C NMR (100 MHz, DMSO-*d*<sub>6</sub>) δ 166.41, 164.45, 163.91, 131.41 (d, *J* = 9.6 Hz), 128.07 (d, *J* = 2.8 Hz), 115.81 (d, *J* = 22.1 Hz). <sup>19</sup>F NMR (377 MHz, DMSO-*d*<sub>6</sub>) δ -105.63 (s, 1F). HRMS (ESI-TOF): Anal Calcd. For. C<sub>9</sub>H<sub>8</sub>FNO<sub>2</sub>+Na<sup>+</sup>: 190.0275, Found: 190.0274. IR (neat, cm<sup>-1</sup>): ν 3336, 3078, 2947, 1637, 1547, 1409, 1328, 892, 791.

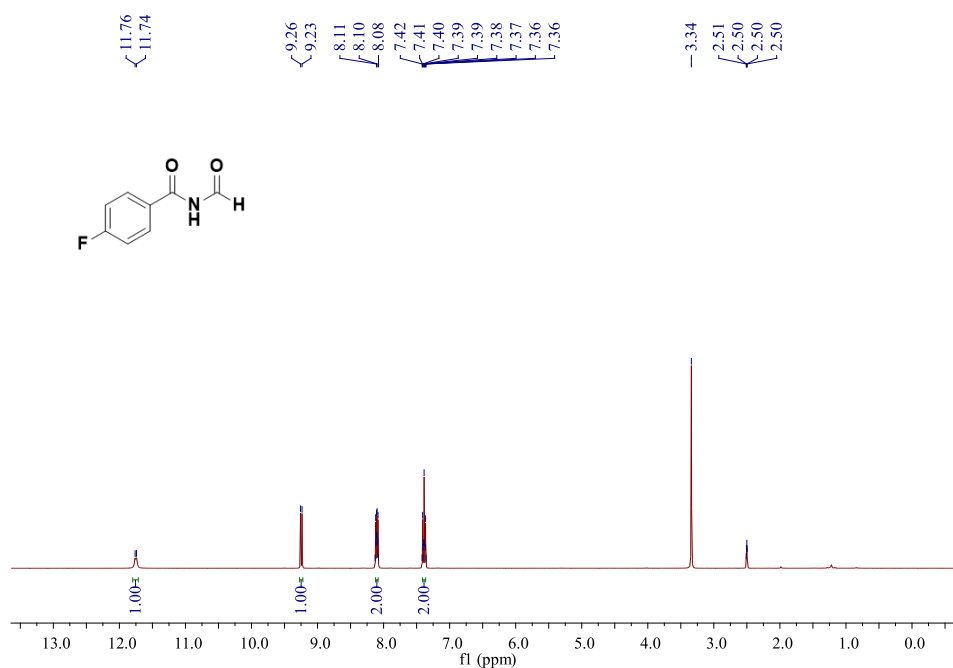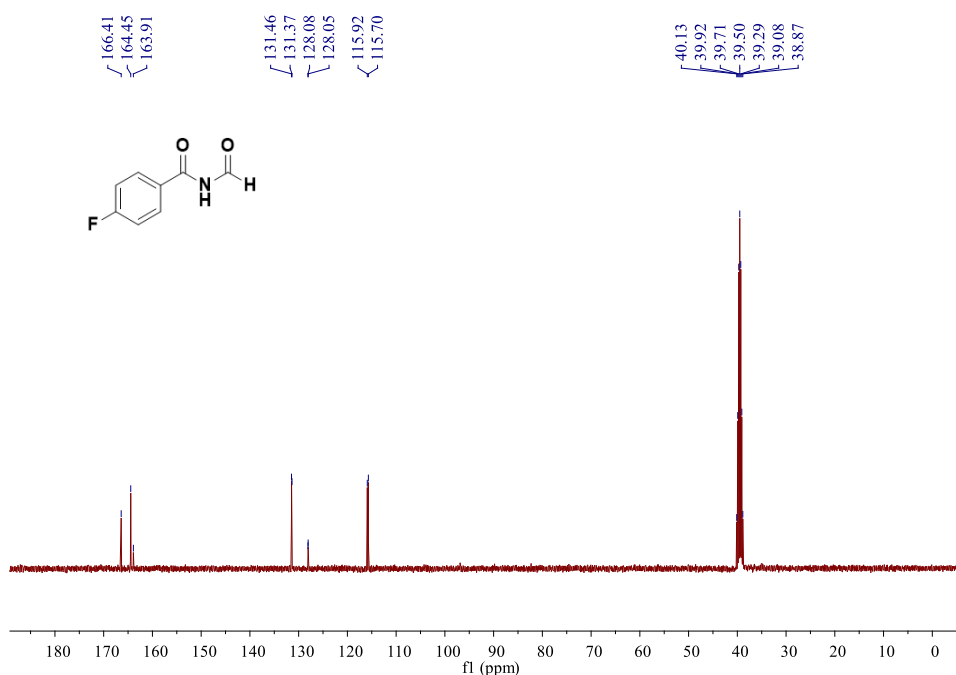



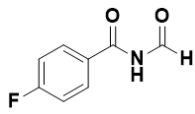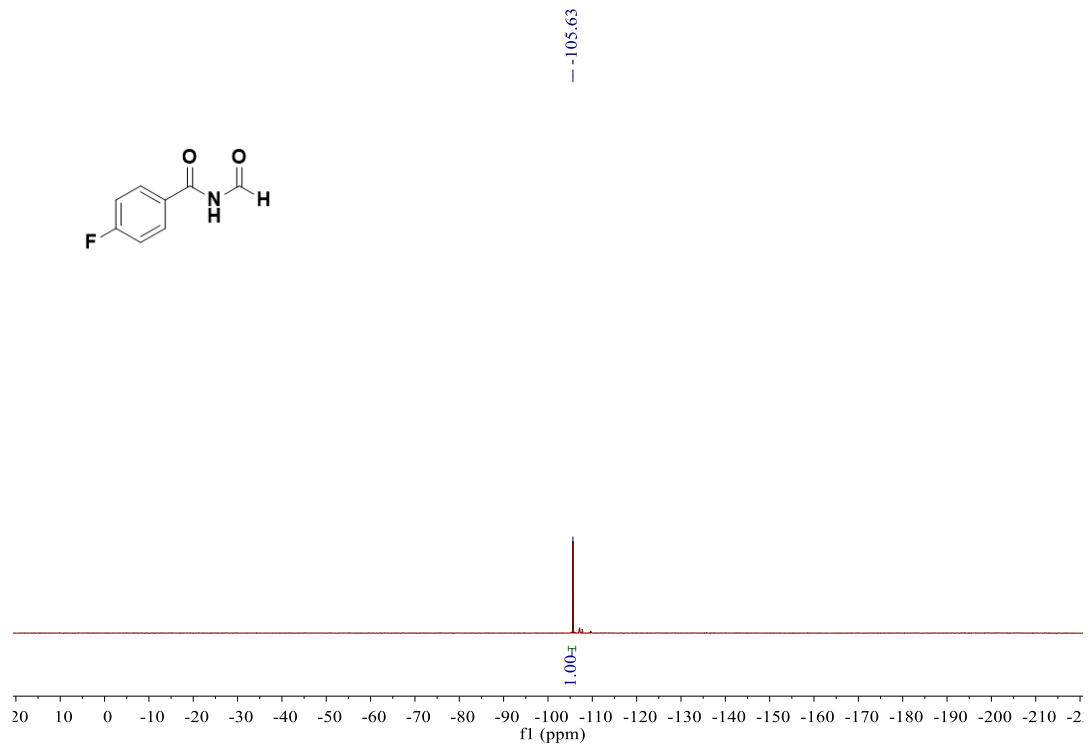

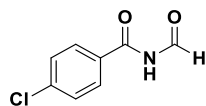

#### 4-Chloro-*N*-Formylbenzamide (2bc)

petroleum ether / ethyl acetate = 5:1, white solid, 51% yield (18.7 mg). mp: 183 – 185°C.  $^1\text{H NMR}$  (400 MHz, DMSO-*d*<sub>6</sub>)  $\delta$  11.78 (d,  $J$  = 8.8 Hz, 1H), 9.24 (d,  $J$  = 8.8 Hz, 1H), 8.04 – 8.01 (m, 2H), 7.63 – 7.61 (m, 2H).  $^{13}\text{C NMR}$  (100 MHz, DMSO-*d*<sub>6</sub>)  $\delta$  166.63, 164.42, 138.42, 130.35, 128.84, 128.84. HRMS (ESI-TOF): Anal Calcd. For. C<sub>8</sub>H<sub>6</sub><sup>35</sup>ClNO<sub>2</sub>+Na<sup>+</sup>: 205.9979, Found: 206.0012. Anal Calcd. For. C<sub>8</sub>H<sub>6</sub><sup>37</sup>ClNO<sub>2</sub>+Na<sup>+</sup>: 207.9950, Found: 207.9954. IR (neat, cm<sup>-1</sup>):  $\nu$  3331, 3076, 2938, 1634, 1551, 1454, 1343, 839, 750.

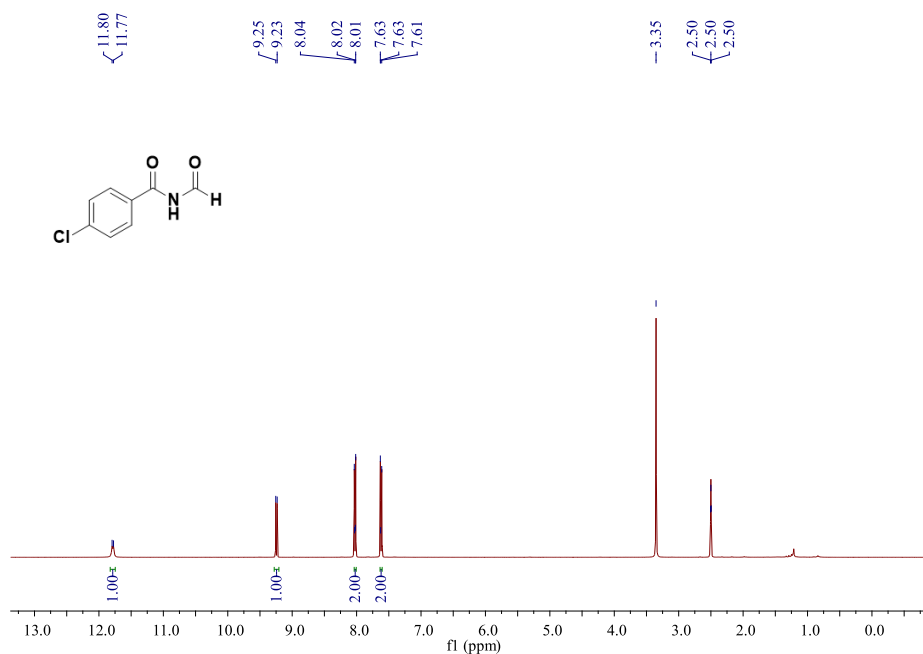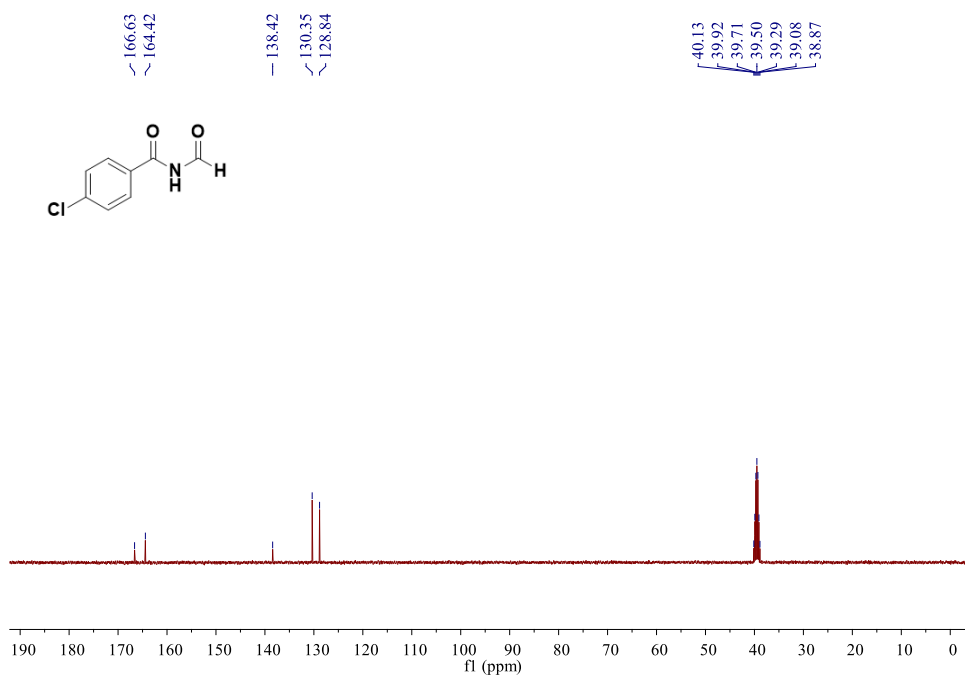

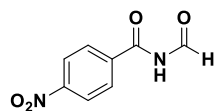

### ***N*-Formyl-4-Nitrobenzamide (2bd)**

petroleum ether / ethyl acetate = 4:1, white solid, 50% yield (19.4 mg). mp: 206 – 208°C. <sup>1</sup>H NMR (300 MHz, DMSO-*d*<sub>6</sub>) δ 11.98 (s, 1H), 9.26 (d, *J* = 6.9 Hz, 1H), 8.36 (d, *J* = 8.9 Hz, 2H), 8.22 (d, *J* = 8.9 Hz, 2H). <sup>13</sup>C NMR (75 MHz, DMSO-*d*<sub>6</sub>) δ 166.37, 164.31, 150.13, 137.16, 129.96, 123.69. HRMS (EI-TOF): Anal Calcd. For. C<sub>8</sub>H<sub>6</sub>N<sub>2</sub>O<sub>4</sub>: 194.0328, Found: 194.0325. IR (neat, cm<sup>-1</sup>): ν 3328, 3051, 2950, 1643, 1549, 1490, 1348, 824, 770.

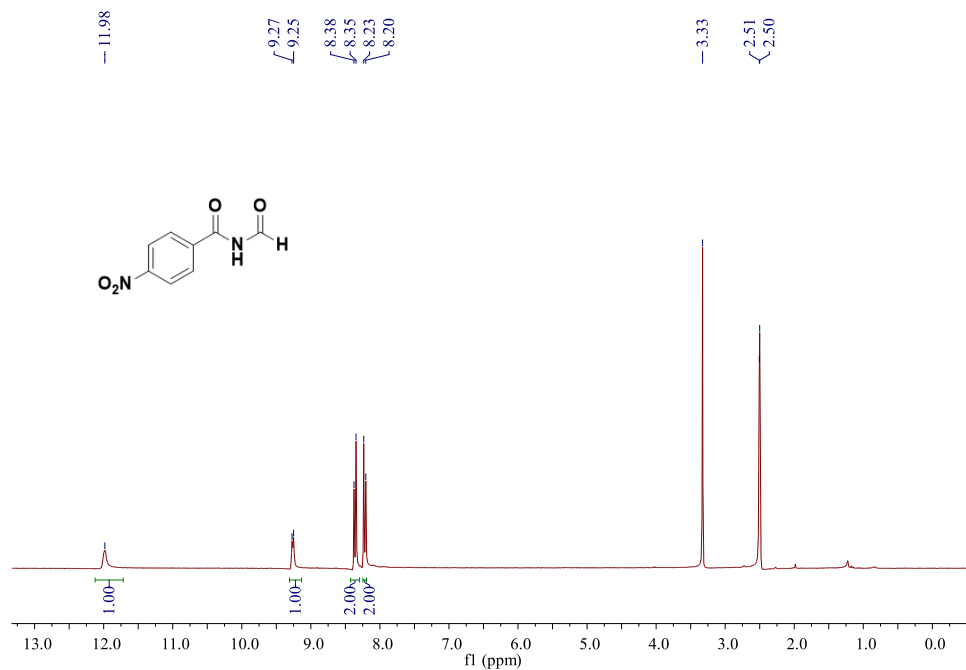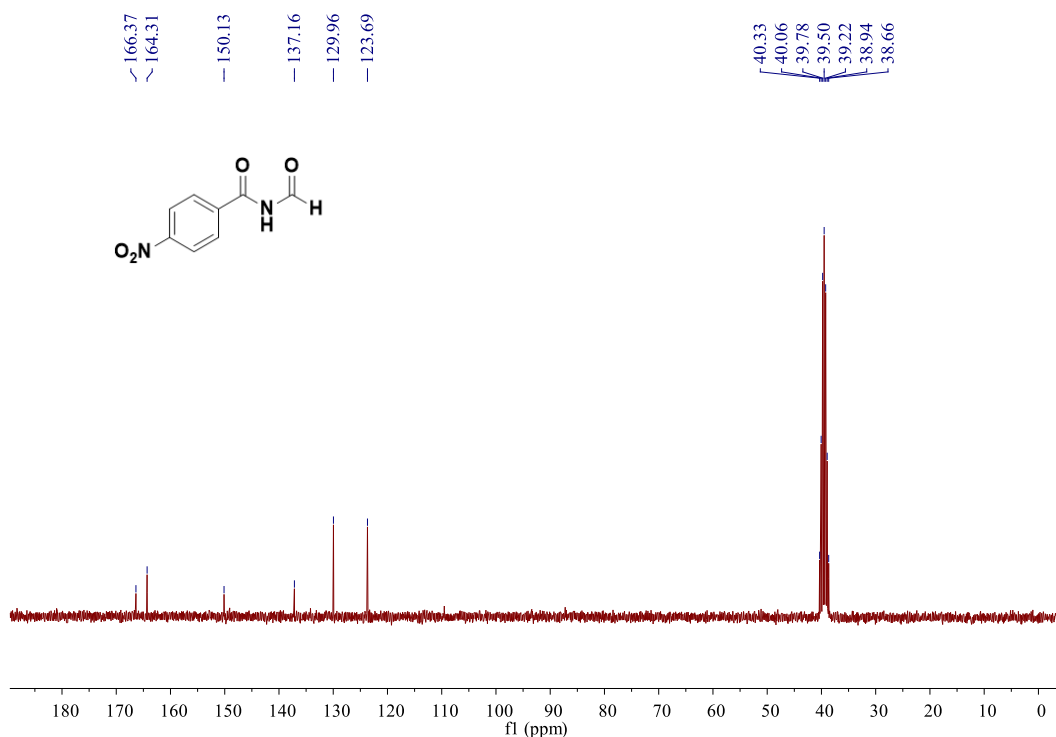

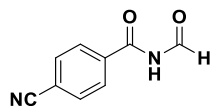

#### 4-Cyano-*N*-Formylbenzamide (2be)

petroleum ether / ethyl acetate = 4:1, white solid, 82% yield (28.5 mg). mp: 78 –80°C.  $^1\text{H NMR}$  (300 MHz, DMSO-*d*6)  $\delta$  11.92 (d,  $J = 7.1$  Hz, 1H), 9.25 (d,  $J = 8.6$  Hz, 1H), 8.14 (d,  $J = 8.6$  Hz, 2H), 8.04 (d,  $J = 8.6$  Hz, 2H).  $^{13}\text{C NMR}$  (75 MHz, DMSO-*d*6)  $\delta$  166.55, 164.33, 135.58, 132.66, 129.12, 118.01, 115.44. **HRMS** (ESI-TOF): Anal Calcd. For.  $\text{C}_9\text{H}_6\text{N}_2\text{O}_2 + \text{Na}^+$ : 197.0321, Found: 197.0318. **IR** (neat,  $\text{cm}^{-1}$ ):  $\nu$  3309, 3054, 2960, 2280, 1724, 1631, 1550, 1447, 1361, 803, 770.

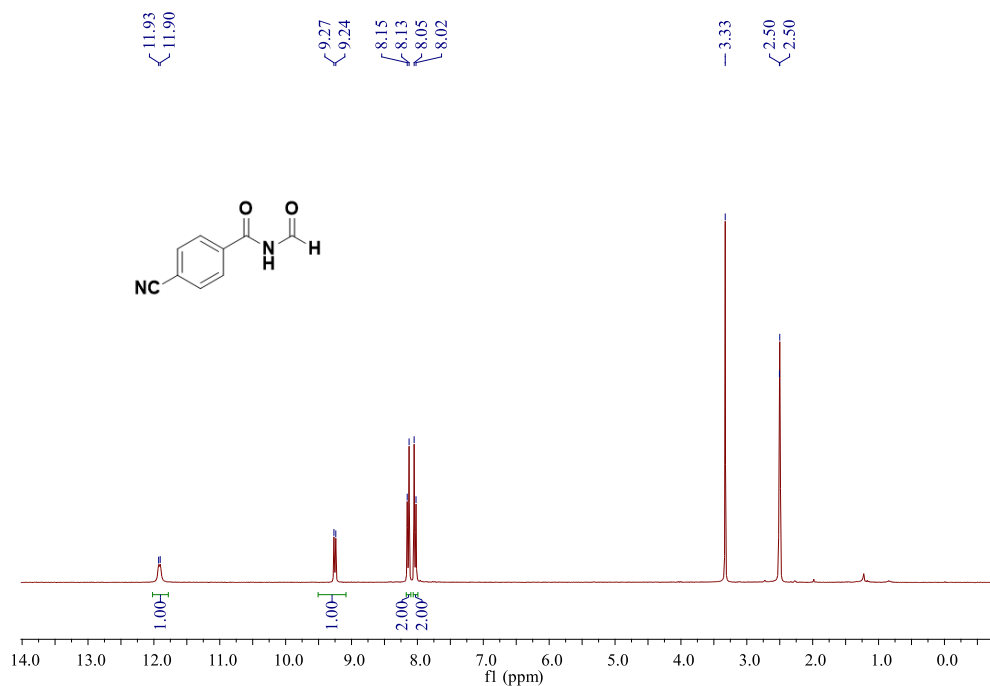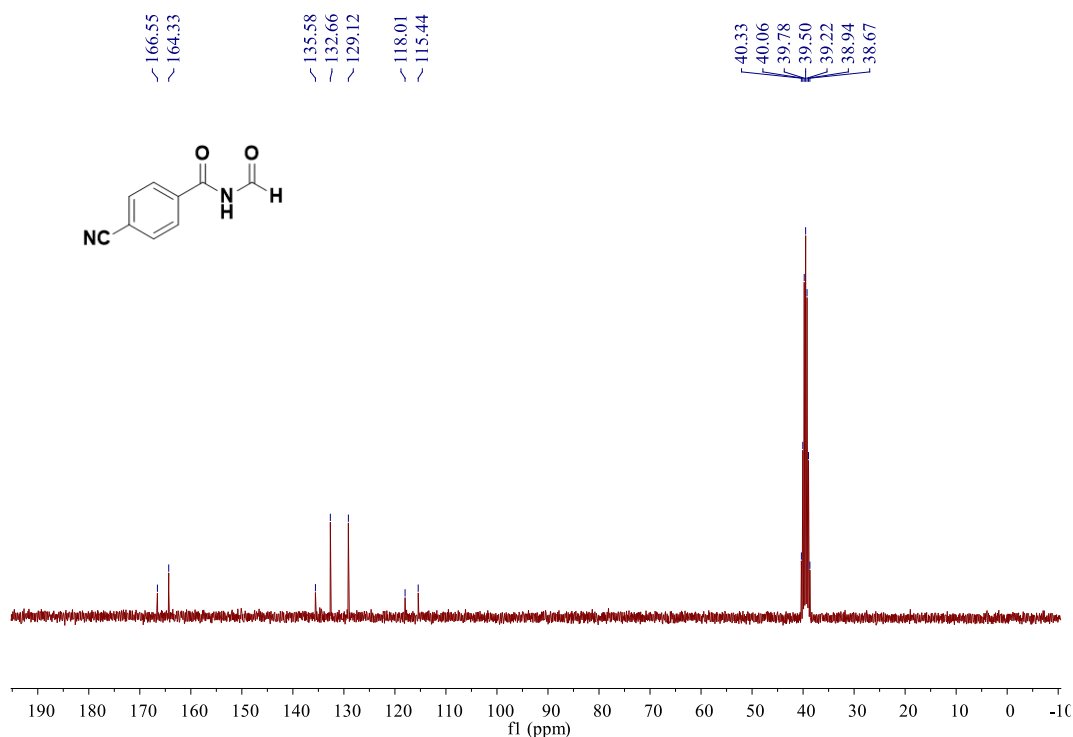

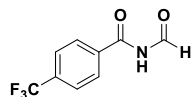

**N-Formyl-4-(trifluoromethyl)Benzamide (2bf)**

petroleum ether / ethyl acetate = 5:1, white solid, 52% yield (22.6mg). mp: 125 – 127°C. <sup>1</sup>H NMR (400 MHz, DMSO-*d*<sub>6</sub>) δ 11.92 (d, *J* = 8.3 Hz, 1H), 9.27 (d, *J* = 8.8 Hz, 1H), 8.19 (d, *J* = 8.3 Hz, 2H), 7.92 (d, *J* = 8.3 Hz, 2H). <sup>13</sup>C NMR (100 MHz, DMSO-*d*<sub>6</sub>) δ 166.68, 164.35, 135.40, 132.81 (q, *J* = 32.0 Hz), 129.32, 125.62 (q, *J* = 40.0 Hz), 123.67 (d, *J* = 272.8 Hz). <sup>19</sup>F NMR (377 MHz, DMSO-*d*<sub>6</sub>) δ -61.69 (s, 3F). **HRMS** (ESI-TOF): Anal Calcd. For. C<sub>9</sub>H<sub>6</sub>F<sub>3</sub>NO<sub>2</sub>+Na<sup>+</sup>: 240.0243, Found: 240.0248. **IR** (neat, cm<sup>-1</sup>): ν 3271, 2963, 1731, 1681, 1503, 815, 797.

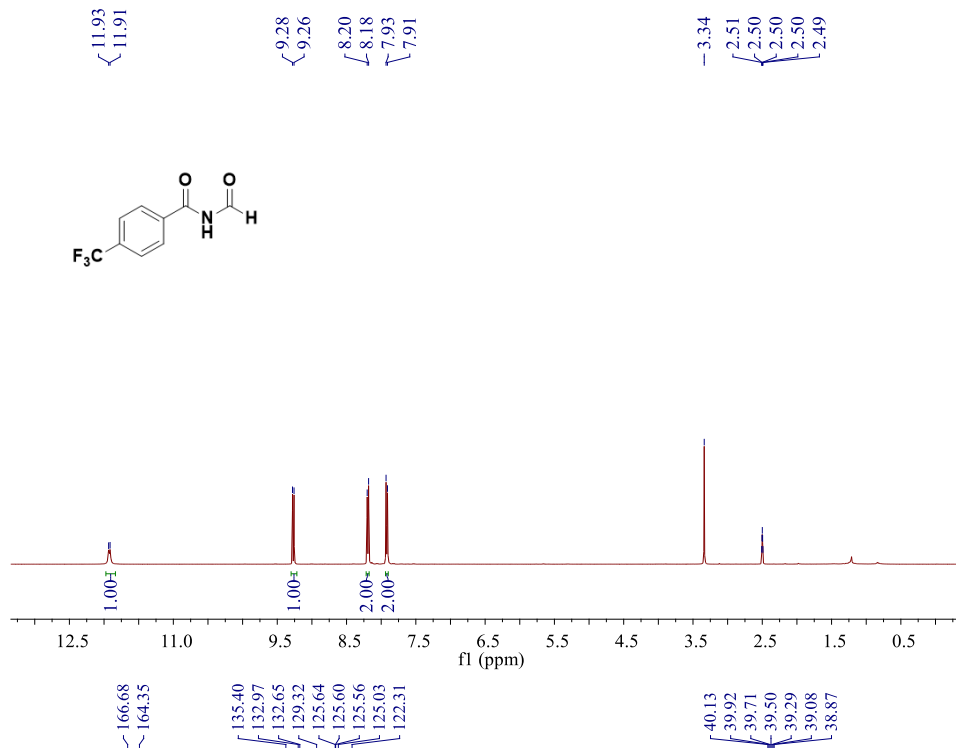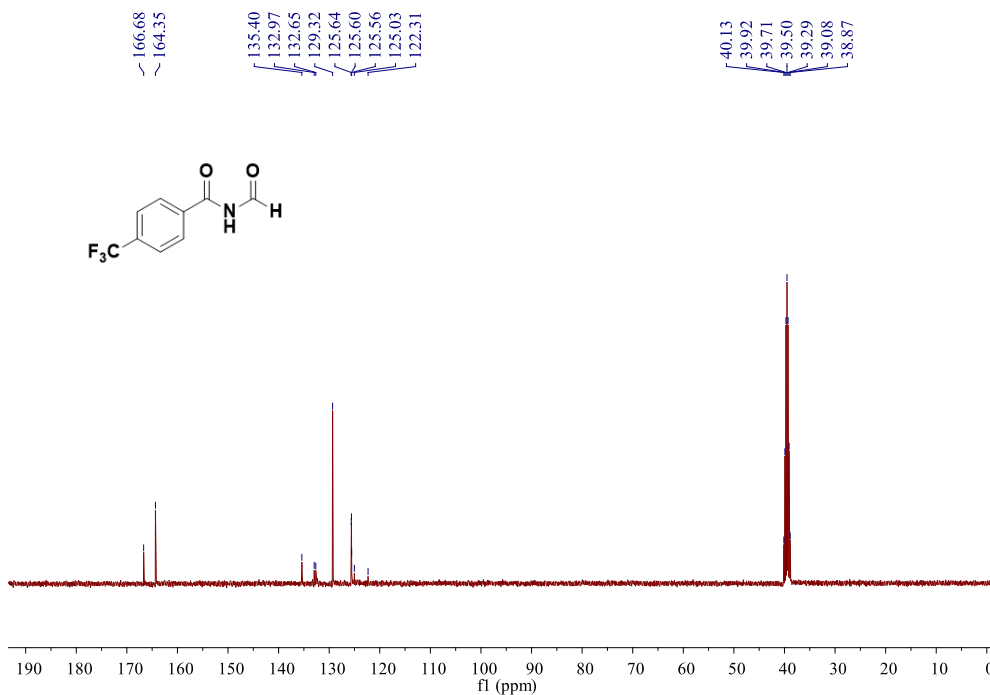

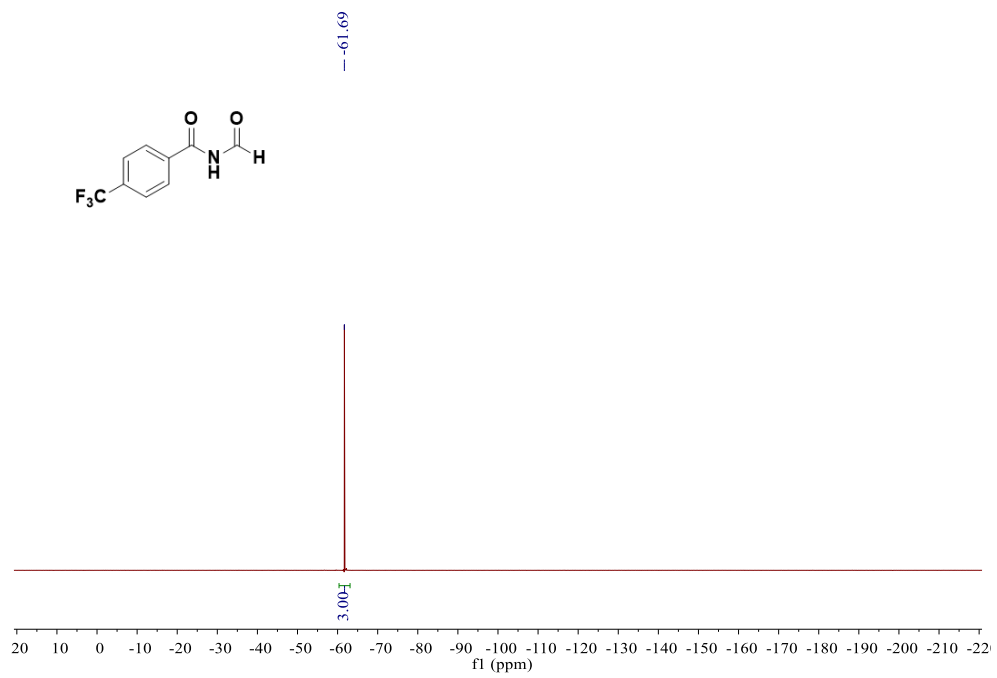

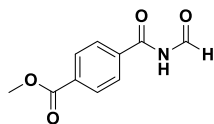

**Methyl 4-(formylcarbamoyl)Benzoate (2bg)**

petroleum ether / ethyl acetate = 5:1, yellow solid, 49% yield (20.3 mg). mp: 185 – 186°C. <sup>1</sup>H NMR (400 MHz, DMSO-*d*<sub>6</sub>) δ 11.88 (d, *J* = 8.8 Hz, 1H), 9.26 (d, *J* = 8.8 Hz, 1H), 8.10 (q, *J* = 8.6 Hz, 4H), 3.89 (s, 3H). <sup>13</sup>C NMR (100 MHz, DMSO-*d*<sub>6</sub>) δ 166.97, 165.44, 164.34, 135.56, 133.50, 129.29, 128.81, 52.54. HRMS (ESI-TOF): Anal Calcd. For. C<sub>10</sub>H<sub>9</sub>NO<sub>4</sub> +Na<sup>+</sup>: 230.0424, Found: 230.0414. IR (neat, cm<sup>-1</sup>): ν 3349, 2959, 2851, 1714, 1675, 1515, 1435, 1377, 1277, 826, 795.

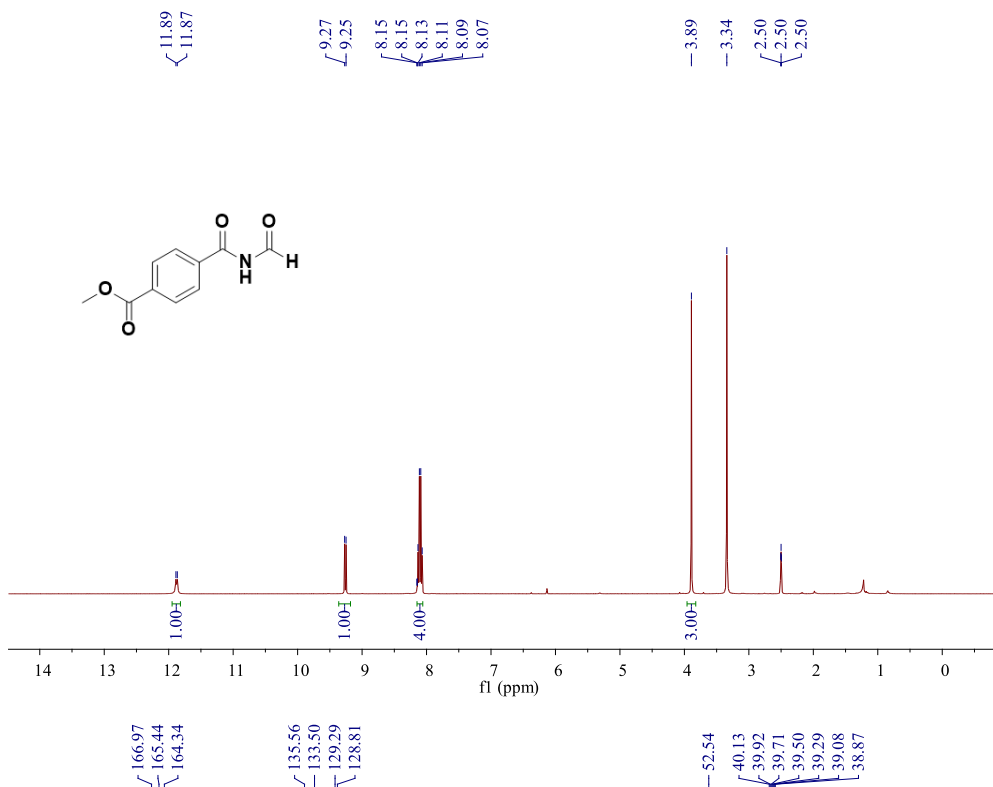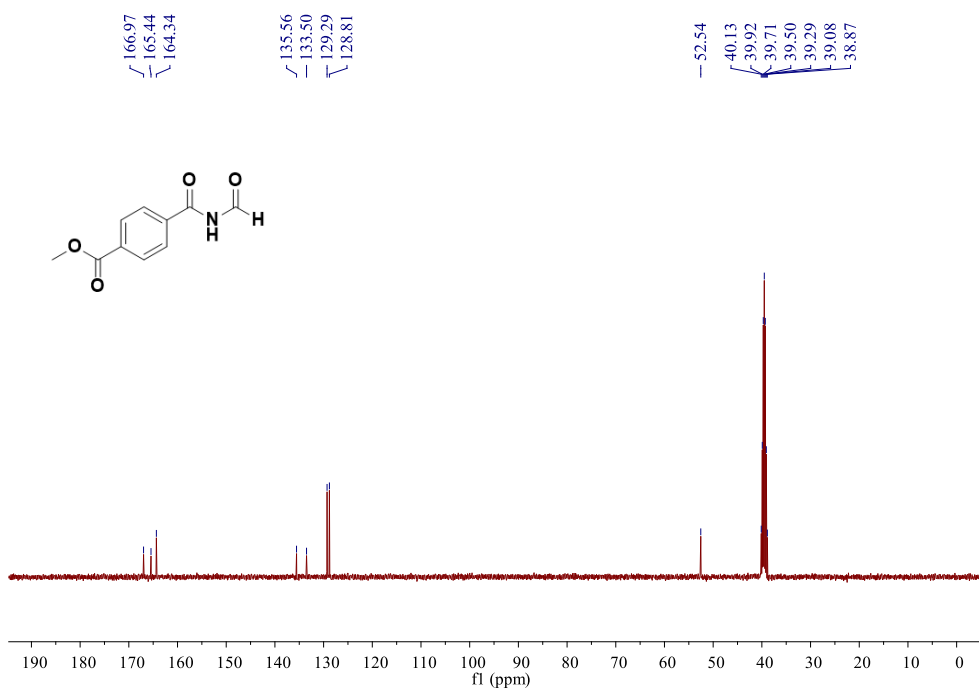

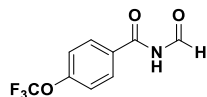

**N-Formyl-4-(trifluoromethoxy)Benzamide (2bh)**

petroleum ether / ethyl acetate = 5:1, white solid, 81% yield (37.8 mg). mp: 101 – 103°C. <sup>1</sup>H NMR (400 MHz, DMSO-*d*<sub>6</sub>) δ 11.83 (d, *J* = 8.8 Hz, 1H), 9.26 (d, *J* = 8.8 Hz, 1H), 8.16 – 8.13 (m, 2H), 7.53 – 7.51 (m, 2H). <sup>13</sup>C NMR (100 MHz, DMSO-*d*<sub>6</sub>) δ 166.40, 164.40, 151.77, 130.98, 130.57, 120.72, 119.92 (q, *J* = 256.0 Hz). <sup>19</sup>F NMR (377 MHz, DMSO-*d*<sub>6</sub>) δ -56.80 (s, 3F). HRMS (ESI-TOF): Anal Calcd. For. C<sub>9</sub>H<sub>6</sub>F<sub>3</sub>NO<sub>3</sub> +Na<sup>+</sup>: 256.0192, Found: 256.0188. IR (neat, cm<sup>-1</sup>): ν 3259, 2853, 1722, 1681, 1518, 1456, 1219, 809.

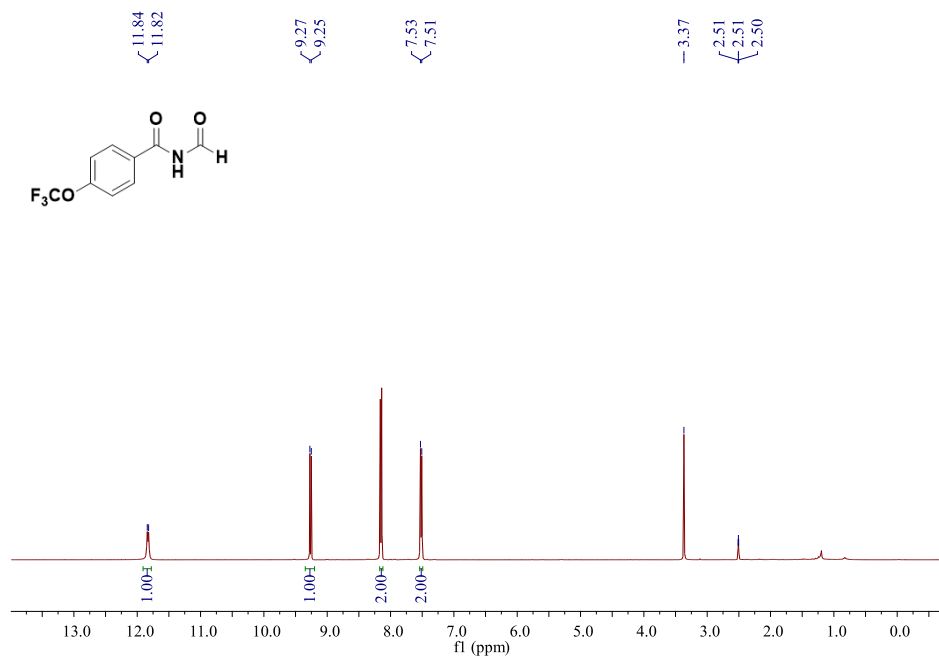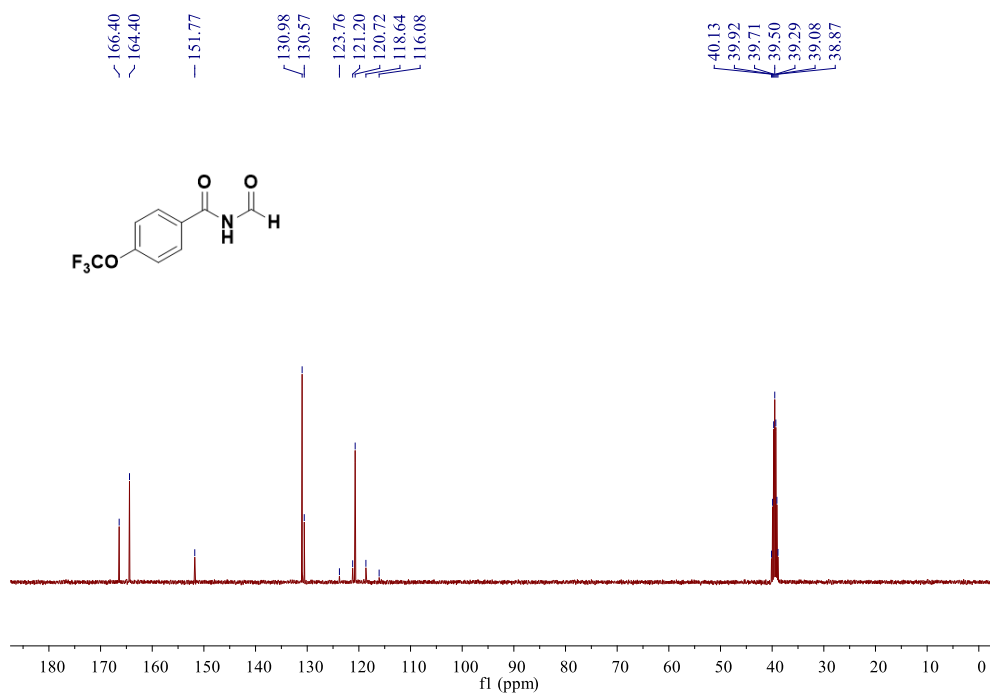



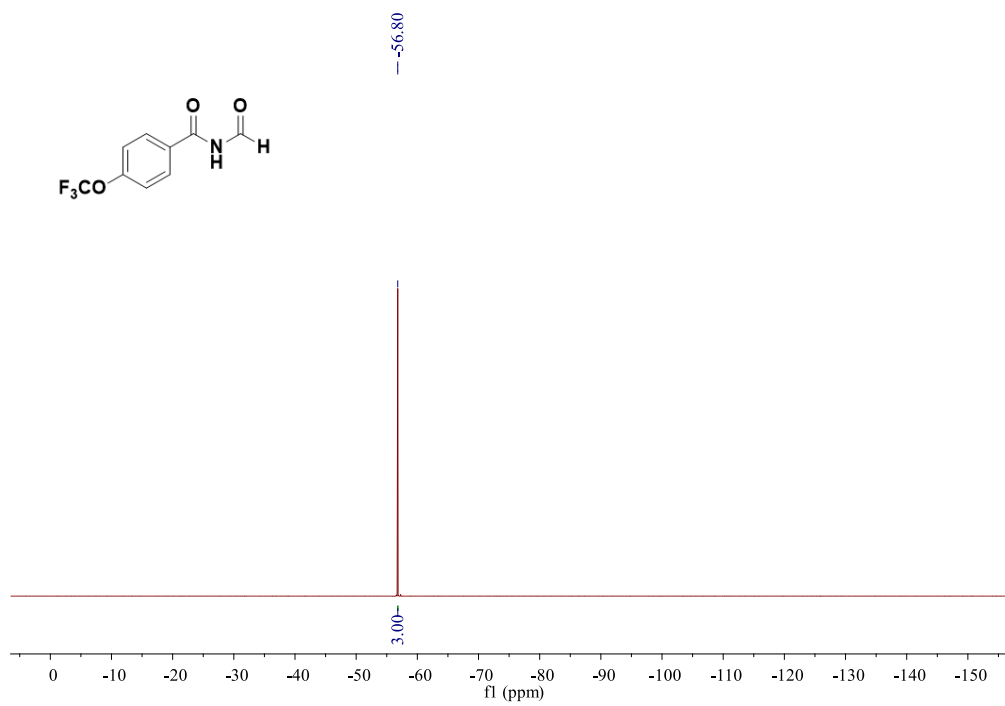

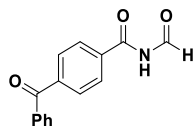

#### 4-Benzoyl-N-Formylbenzamide (2bi)

petroleum ether / ethyl acetate = 5:1, white solid, 40% yield (20.2 mg). mp: 96 – 98°C.  $^1\text{H NMR}$  (400 MHz, DMSO-*d*<sub>6</sub>)  $\delta$  11.90 (d,  $J$  = 8.8 Hz, 1H), 9.28 (d,  $J$  = 8.8 Hz, 1H), 8.16 (d,  $J$  = 8.5 Hz, 2H), 7.85 (d,  $J$  = 8.5 Hz, 2H), 7.77 – 7.70 (m, 3H), 7.59 (t,  $J$  = 7.6 Hz, 2H).  $^{13}\text{C NMR}$  (100 MHz, DMSO-*d*<sub>6</sub>)  $\delta$  195.25, 167.03, 164.40, 141.00, 136.33, 134.65, 133.25, 129.77, 129.54, 128.74, 128.61. **HRMS** (ESI-TOF): Anal Calcd. For. C<sub>15</sub>H<sub>11</sub>NO<sub>3</sub> +Na<sup>+</sup>: 276.0631, Found: 276.0615. **IR** (neat, cm<sup>-1</sup>):  $\nu$  3332, 0934, 1660, 1553, 1447, 1315, 839, 766.

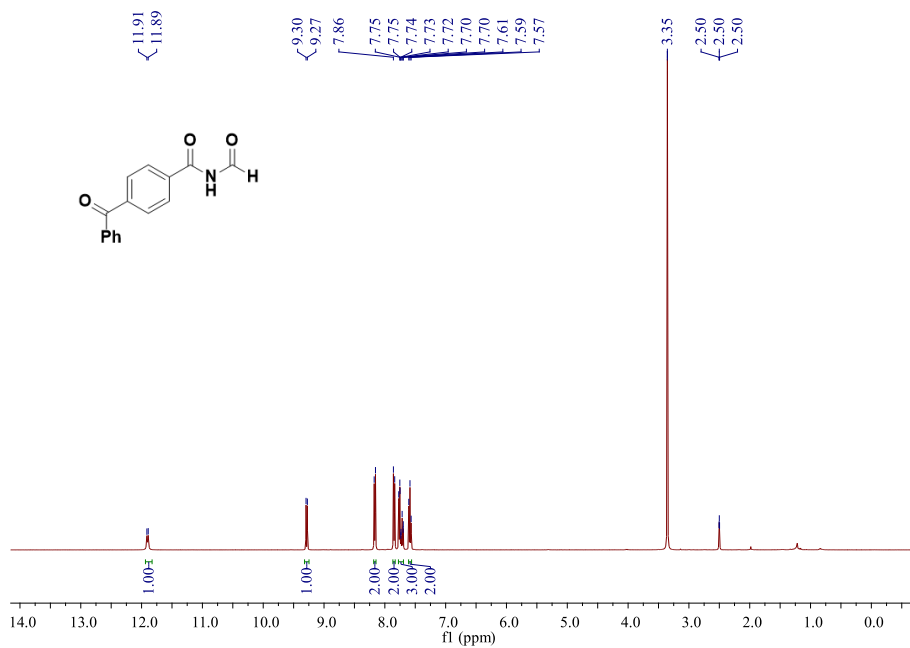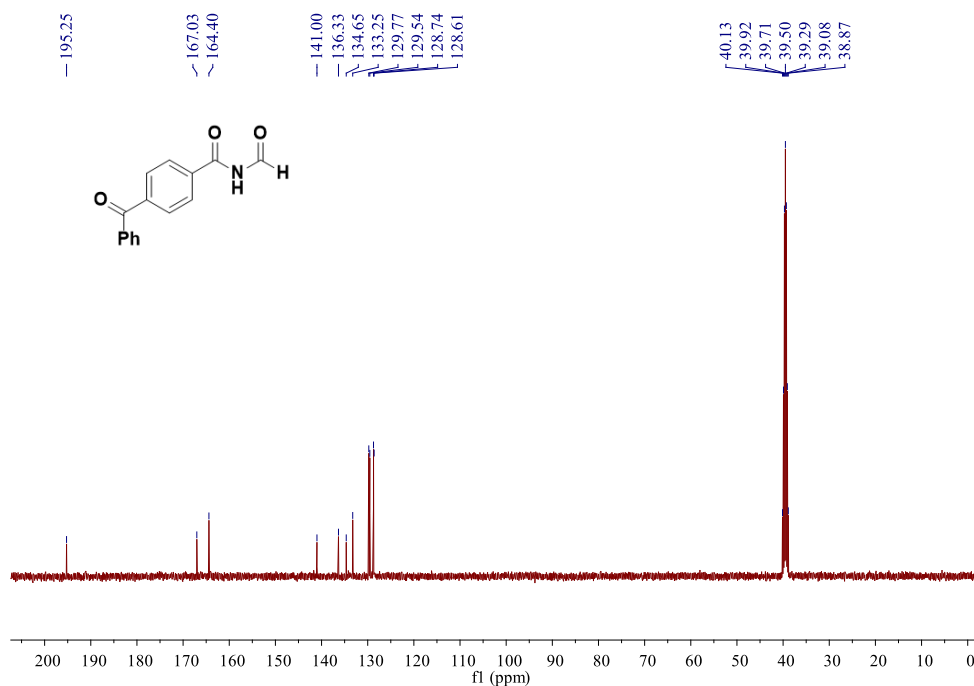

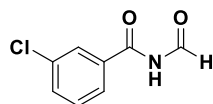

### 3-Chloro-*N*-Formylbenzamide (2bj)

petroleum ether / ethyl acetate = 5:1, white solid, 78% yield (36.6 mg). mp: 135 – 137°C. <sup>1</sup>H NMR (400 MHz, DMSO-*d*<sub>6</sub>) δ 11.80 (s, 1H), 9.24 (d, *J* = 7.8 Hz, 1H), 8.06 (t, *J* = 1.9 Hz, 1H), 7.98 – 7.95 (m, 1H), 7.75 – 7.72 (m, 1H), 7.58 (t, *J* = 7.8 Hz, 1H). <sup>13</sup>C NMR (100 MHz, DMSO-*d*<sub>6</sub>) δ 166.32, 164.32, 133.58, 133.52, 133.17, 130.66, 128.15, 127.10. HRMS (ESI-TOF): Anal Calcd. For. C<sub>8</sub>H<sub>6</sub><sup>35</sup>ClNO<sub>2</sub>+Na<sup>+</sup>: 205.9979, Found: 205.9985. Anal Calcd. For. C<sub>8</sub>H<sub>6</sub><sup>35</sup>ClNO<sub>2</sub>+Na<sup>+</sup>: 205.9950, Found: 205.9932. IR (neat, cm<sup>-1</sup>): ν 3077, 2921, 1726, 1674, 1588, 1459, 1364, 887, 762.

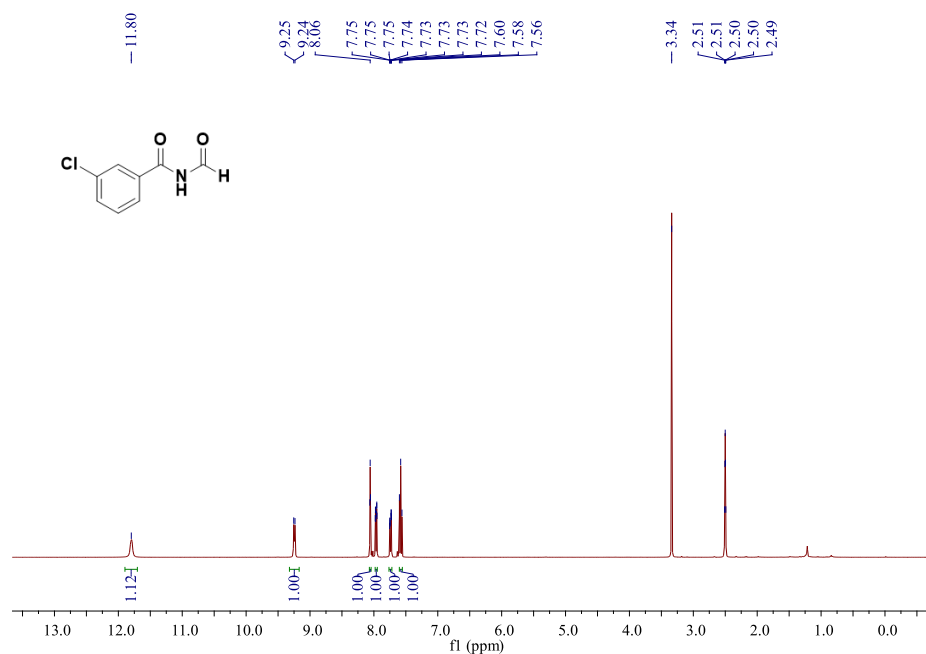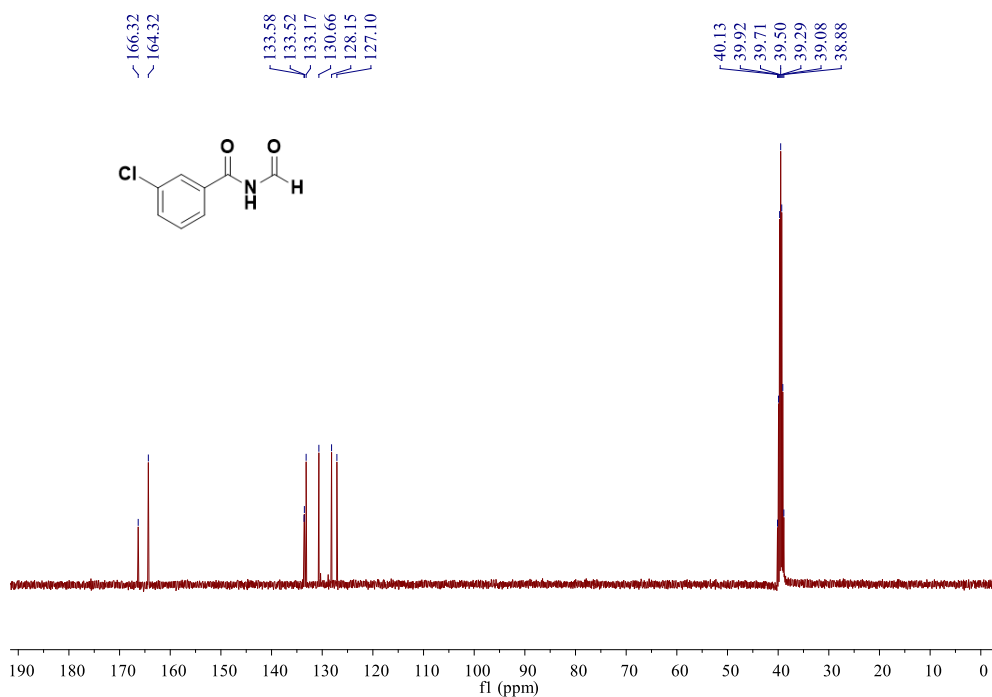

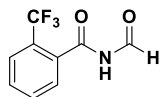

***N*-Formyl-2-(trifluoromethyl)Benzamide (2bk)**

petroleum ether / ethyl acetate = 5:1, white solid, 62% yield (26.9 mg). mp: 107 – 109°C. <sup>1</sup>H NMR (400 MHz, DMSO-*d*6) δ 11.83 (d, *J* = 8.5 Hz, 1H), 9.15 (s, 1H), 7.88 – 7.74 (m, 4H). <sup>13</sup>C NMR (100 MHz, DMSO-*d*6) δ 168.61, 163.44, 133.10, 132.70, 131.25, 128.65, 126.59 (q, *J* = 4.8 Hz), 126.01 (q, *J* = 31.7 Hz, 1H), 123.52 (q, *J* = 273.6 Hz, 1H). <sup>19</sup>F NMR (377 MHz, DMSO-*d*6) δ -57.73 (s, 3F). HRMS (ESI-TOF): Anal Calcd. For. C<sub>9</sub>H<sub>6</sub>F<sub>3</sub>NO<sub>2</sub>+Na<sup>+</sup>: 240.0423, Found: 240.0234. IR (neat, cm<sup>-1</sup>): ν 3269, 2925, 1729, 1682, 1587, 1465, 1363, 757.

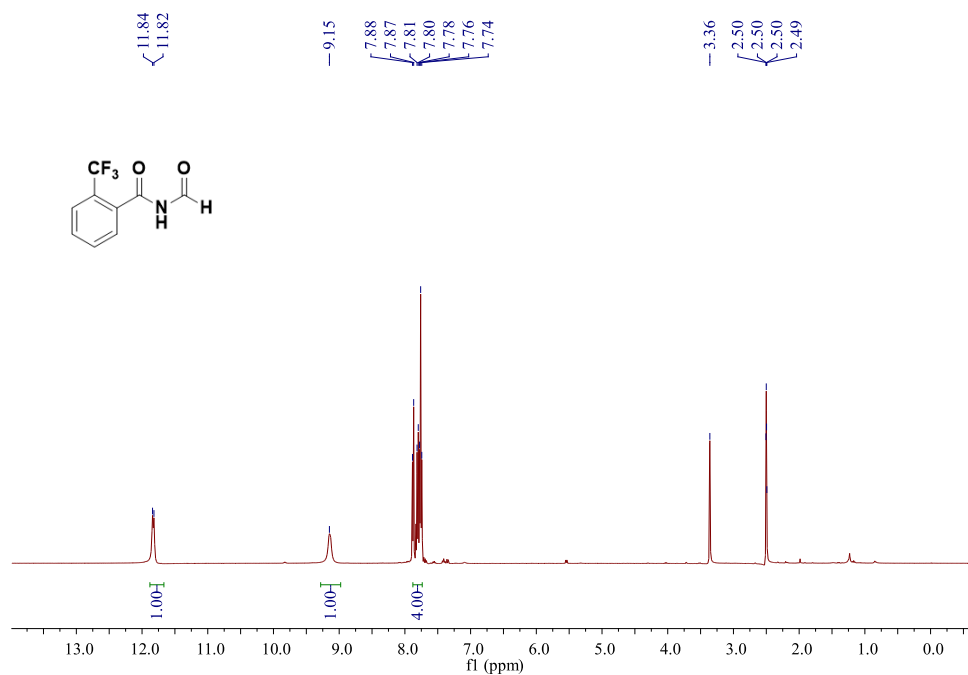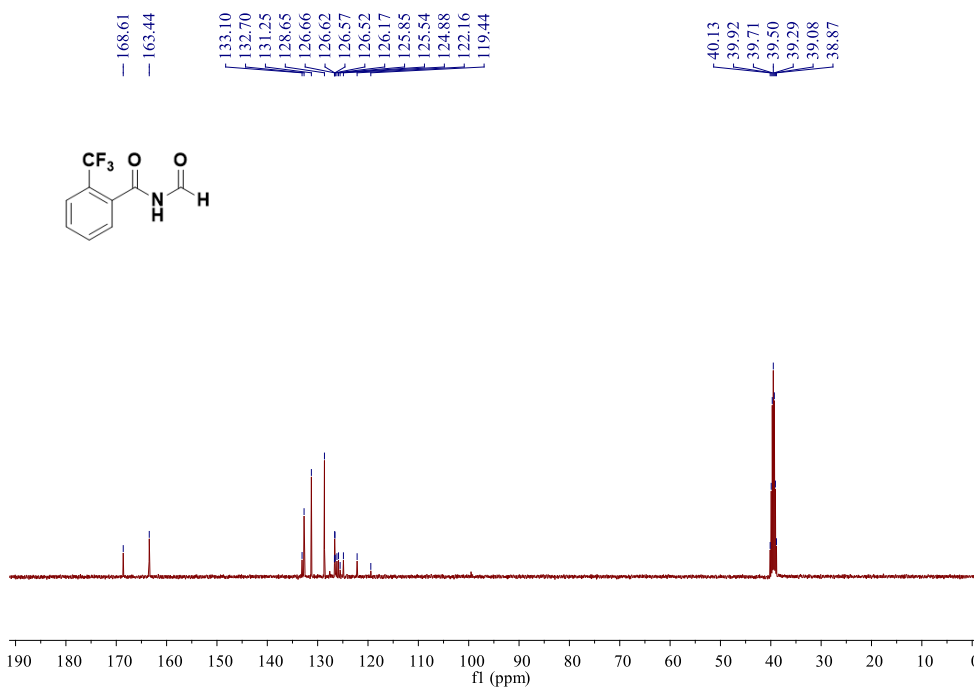

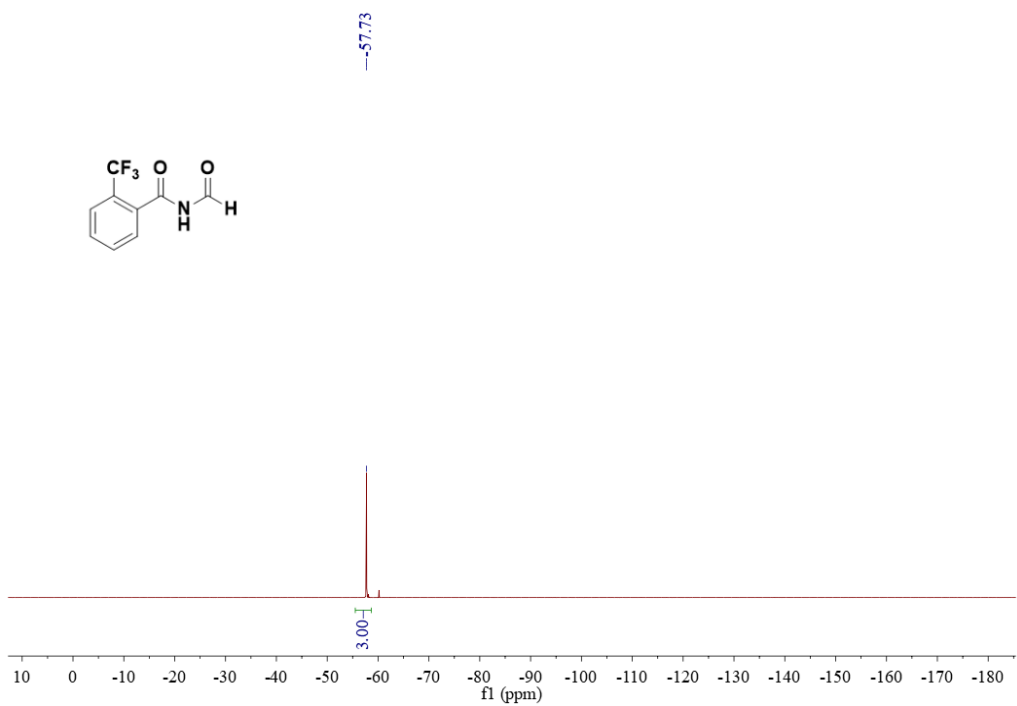

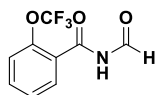

**N-Formyl-2-(trifluoromethoxy)Benzamide (2bl)**

petroleum ether / ethyl acetate = 5:1, yellow solid, 65% yield (30.3 mg). mp: 95 – 97°C. <sup>1</sup>H NMR (400 MHz, DMSO-*d*<sub>6</sub>) δ 11.74 (d, *J* = 9.1 Hz, 1H), 9.15 (d, *J* = 9.1 Hz, 1H), 7.76 – 7.70 (m, 2H), 7.57 – 7.51 (m, 2H). <sup>13</sup>C NMR (75 MHz, DMSO-*d*<sub>6</sub>) δ 166.26, 163.53, 145.13, 133.49, 130.22, 127.93, 127.82, 121.93, 119.94 (q, *J* = 257.4 Hz, 1H). <sup>19</sup>F NMR (377 MHz, DMSO-*d*<sub>6</sub>) δ -56.69 (s, 3F). HRMS (ESI-TOF): Anal Calcd. For. C<sub>9</sub>H<sub>6</sub>F<sub>3</sub>NO<sub>3</sub> +Na<sup>+</sup>: 256.0192, Found: 256.0196. IR (neat, cm<sup>-1</sup>): ν 3285, 3073, 2981, 1648, 1552, 1444, 1320, 1248, 746.

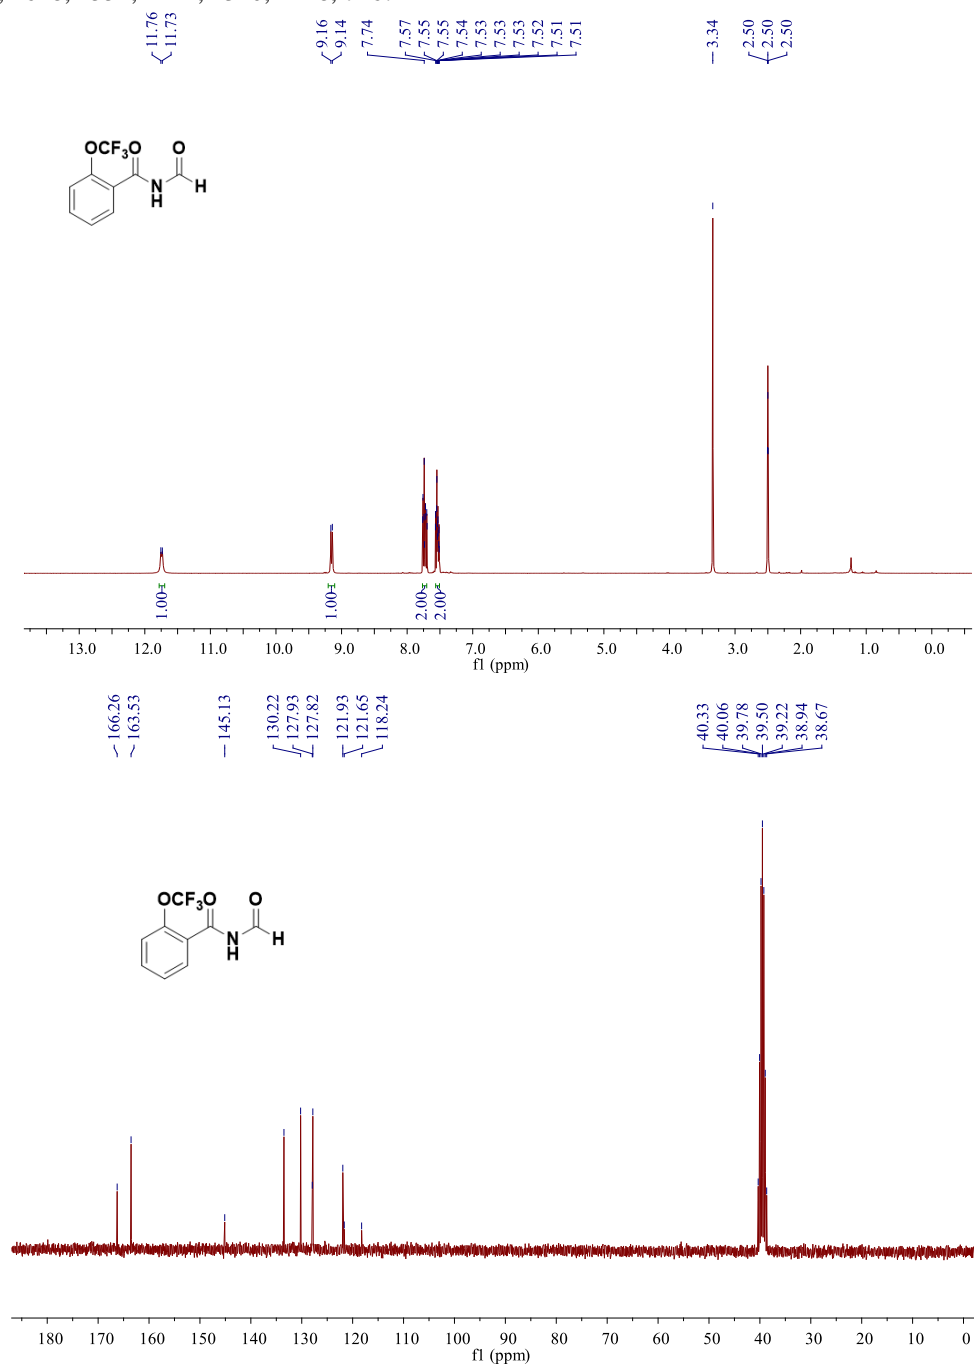

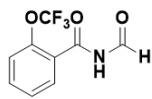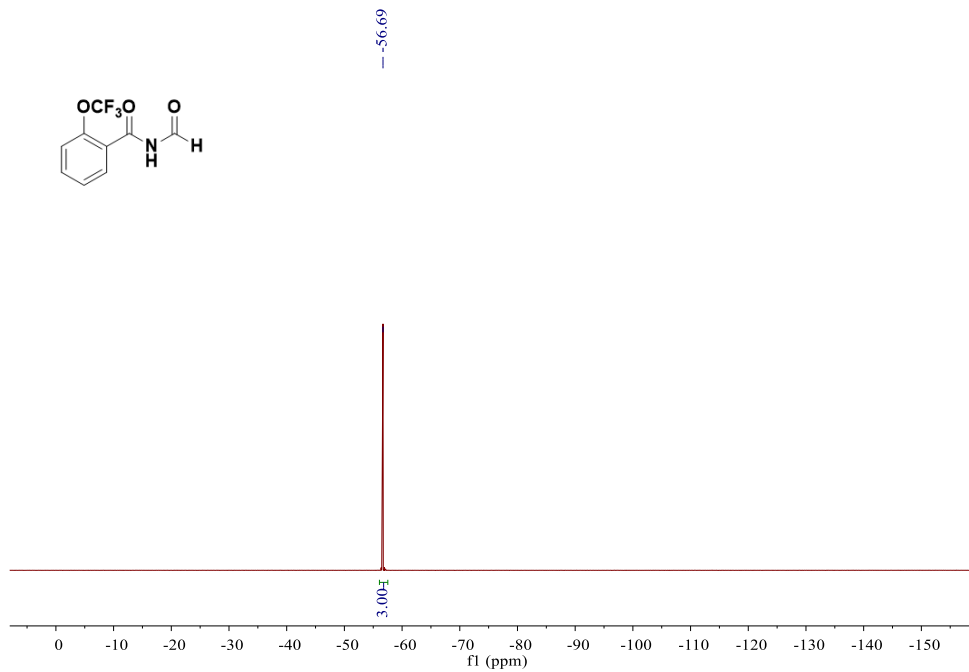

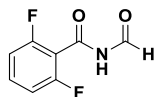

### 2,6-Difluoro-*N*-Formylbenzamide (2bm)

petroleum ether / ethyl acetate = 5:1, white solid, 68% yield (25.2 mg). mp: 140 – 142°C.  $^1\text{H NMR}$  (400 MHz, DMSO-*d*6)  $\delta$  11.92 (d,  $J = 7.4$  Hz, 1H), 9.15 (d,  $J = 7.4$  Hz, 1H), 7.67 – 7.61 (m, 1H), 7.29 – 7.24 (m, 2H).  $^{13}\text{C NMR}$  (100 MHz, DMSO-*d*6)  $\delta$  163.13, 161.88, 160.16 (d,  $J = 7.0$  Hz), 157.63 (d,  $J = 7.0$  Hz), 133.78 (t,  $J = 10.4$  Hz), 112.4 (m).  $^{19}\text{F NMR}$  (377 MHz, DMSO-*d*6)  $\delta$  -112.95 (s, 2F). **HRMS** (ESI-TOF): Anal Calcd. For.  $\text{C}_8\text{H}_5\text{F}_2\text{NO}_2 + \text{Na}^+$ : 208.0181, Found: 208.0188. **IR** (neat,  $\text{cm}^{-1}$ ):  $\nu$  3277, 2945, 1722, 1668, 847, 775.

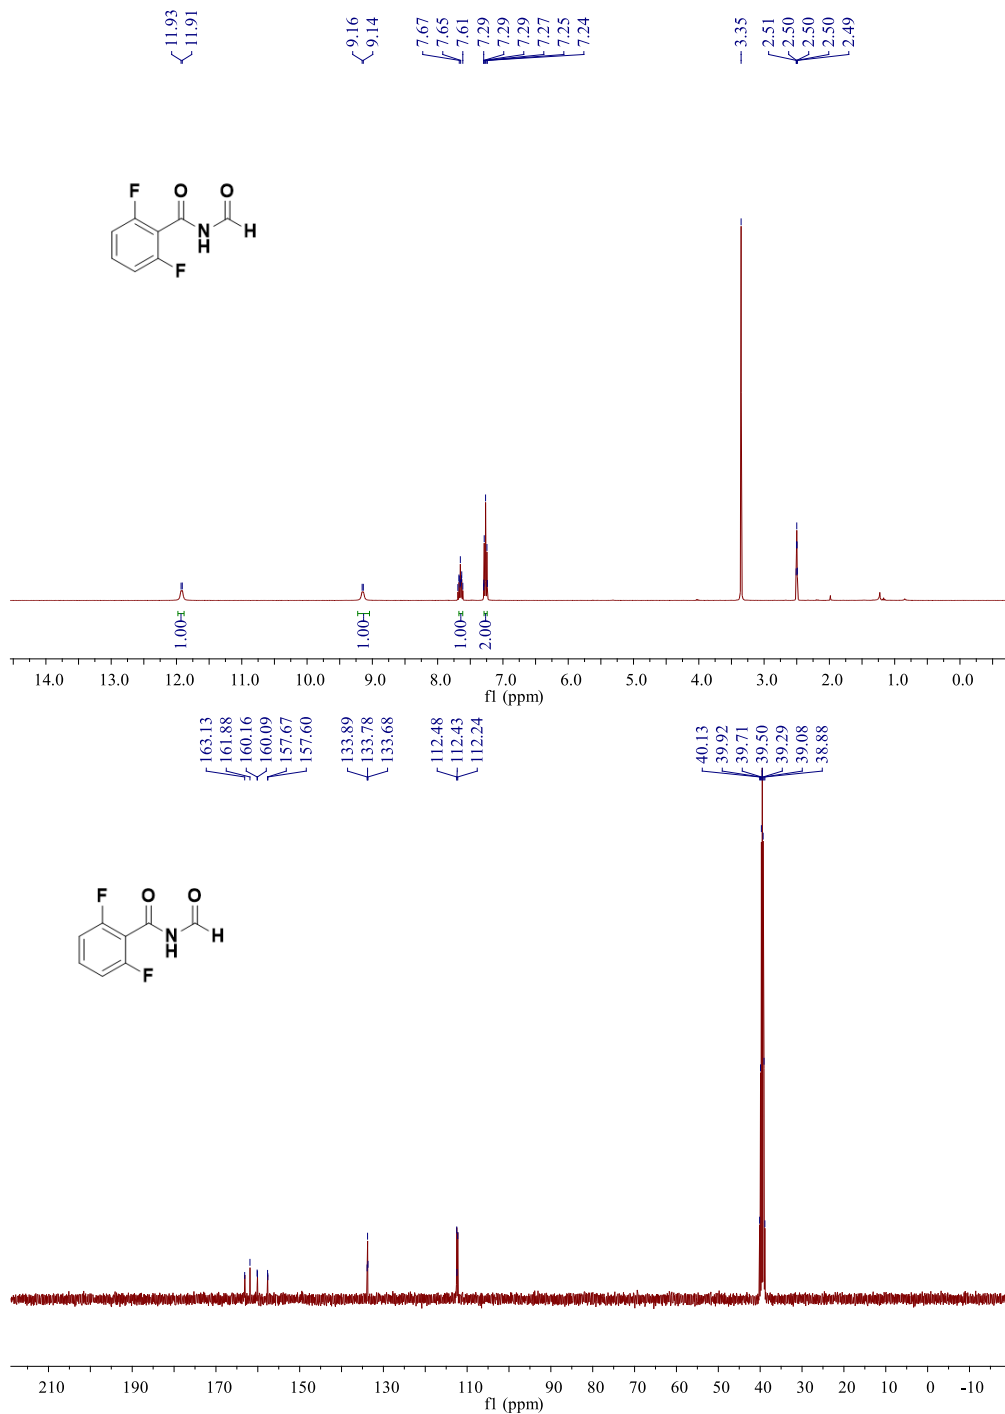



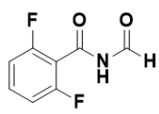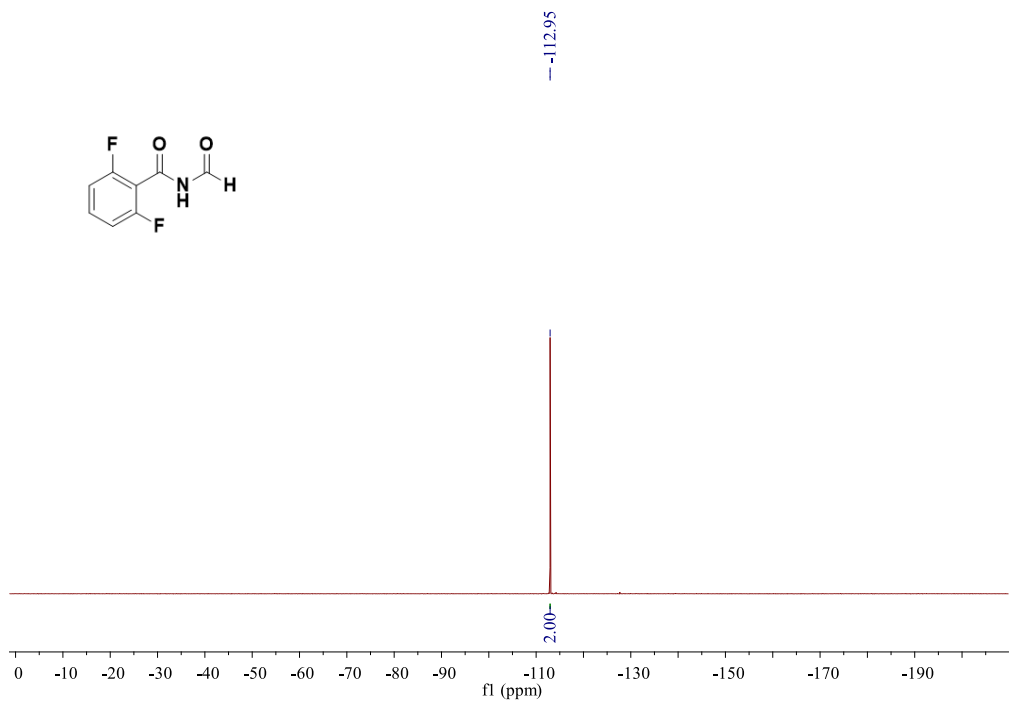

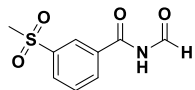

***N*-Formyl-3-(methylsulfonyl)Benzamide (2bn)**

petroleum ether / ethyl acetate = 1:1, white solid, 47% yield (21.3 mg). mp: 45 – 46°C. <sup>1</sup>H NMR (400 MHz, DMSO-*d*<sub>6</sub>) δ 11.97 (d, *J* = 8.8 Hz, 1H), 9.27 (d, *J* = 8.8 Hz, 1H), 8.52 (t, *J* = 1.6 Hz, 1H), 8.33 – 8.30 (m, 1H), 8.21 – 8.19 (m, 1H), 7.84 (t, *J* = 7.8 Hz, 1H), 3.29 (s, 3H). <sup>13</sup>C NMR (100 MHz, DMSO-*d*<sub>6</sub>) δ 166.36, 164.37, 141.34, 133.26, 132.77, 131.39, 130.08, 127.02, 43.36. HRMS (ESI-TOF): Anal Calcd. For. C<sub>9</sub>H<sub>9</sub>NO<sub>4</sub>S+Na<sup>+</sup>: 250.0144, Found: 250.0145. IR (neat, cm<sup>-1</sup>): ν 3200, 2927, 2854, 1730, 1667, 1523, 907, 865, 778.

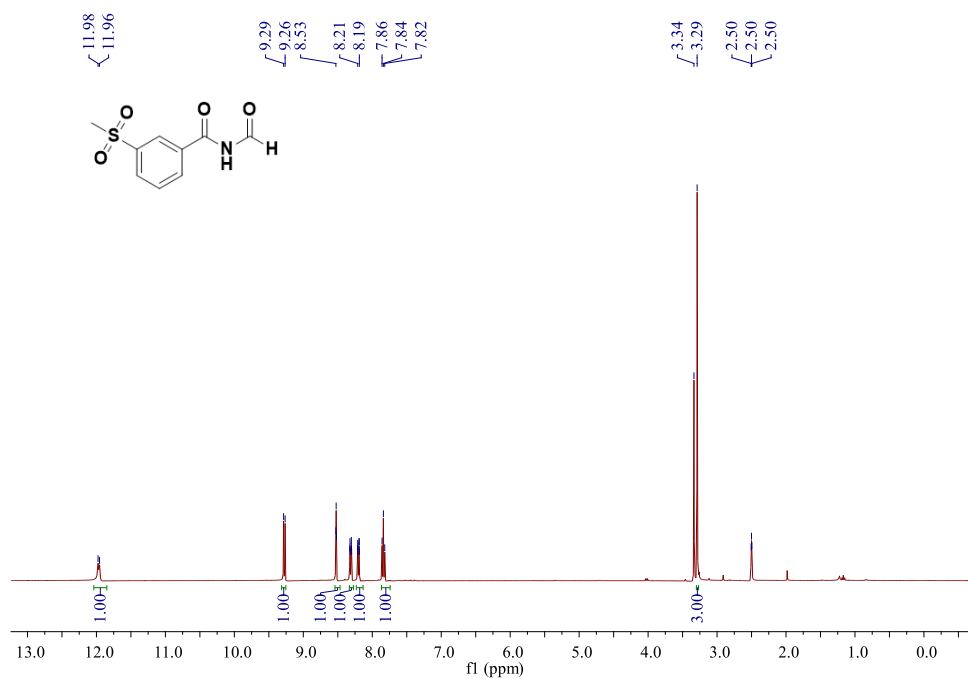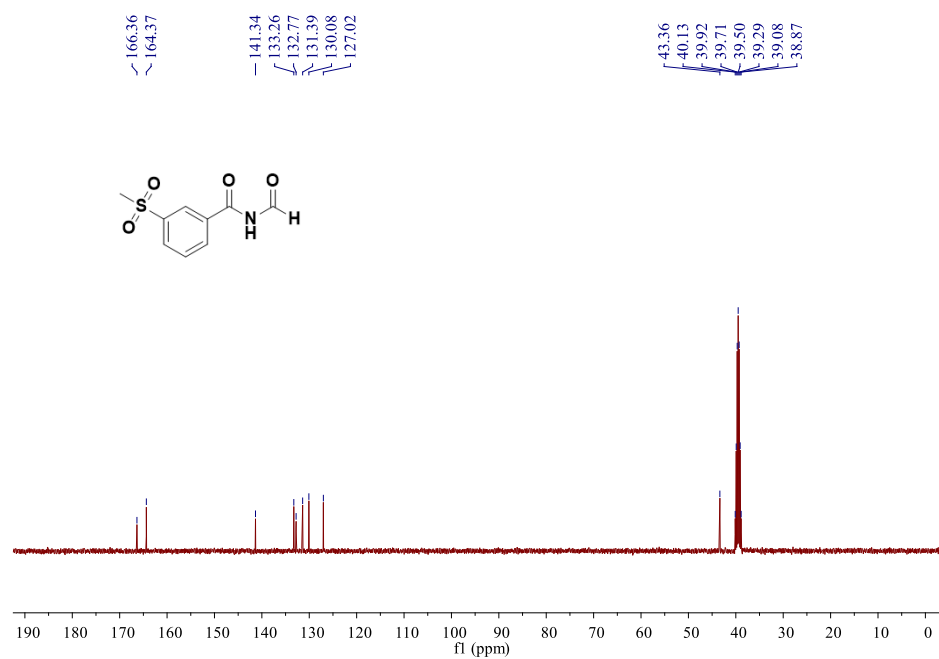

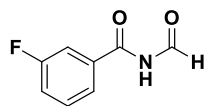

### 3-Fluoro-N-Formylbenzamide (2bo)

petroleum ether / ethyl acetate = 5:1, yellow solid, 62% yield (20.7 mg). mp: 144 – 146°C. <sup>1</sup>H NMR (400 MHz, DMSO-*d*<sub>6</sub>) δ 11.79 (d, *J* = 7.0 Hz, 1H), 9.25 (d, *J* = 8.7 Hz, 1H), 7.86 – 7.81 (m, 2H), 7.64 – 7.51 (m, 2H). <sup>13</sup>C NMR (100 MHz, DMSO-*d*<sub>6</sub>) δ 166.31, 164.38, 161.91 (d, *J* = 245.0 Hz), 133.82 (d, *J* = 7.1 Hz), 130.94 (d, *J* = 8.0 Hz), 124.64 (d, *J* = 2.9 Hz), 120.40 (d, *J* = 21.2 Hz), 115.14 (d, *J* = 23.4 Hz). <sup>19</sup>F NMR (377 MHz, DMSO-*d*<sub>6</sub>) δ -112.07 (s, 1F). HRMS (ESI-TOF): Anal Calcd. For. C<sub>8</sub>H<sub>6</sub>FNO<sub>2</sub>+Na<sup>+</sup>: 190.0275, Found: 190.0276. IR (neat, cm<sup>-1</sup>): ν 3336, 2948, 1686, 1548, 1440, 1327, 892, 791.

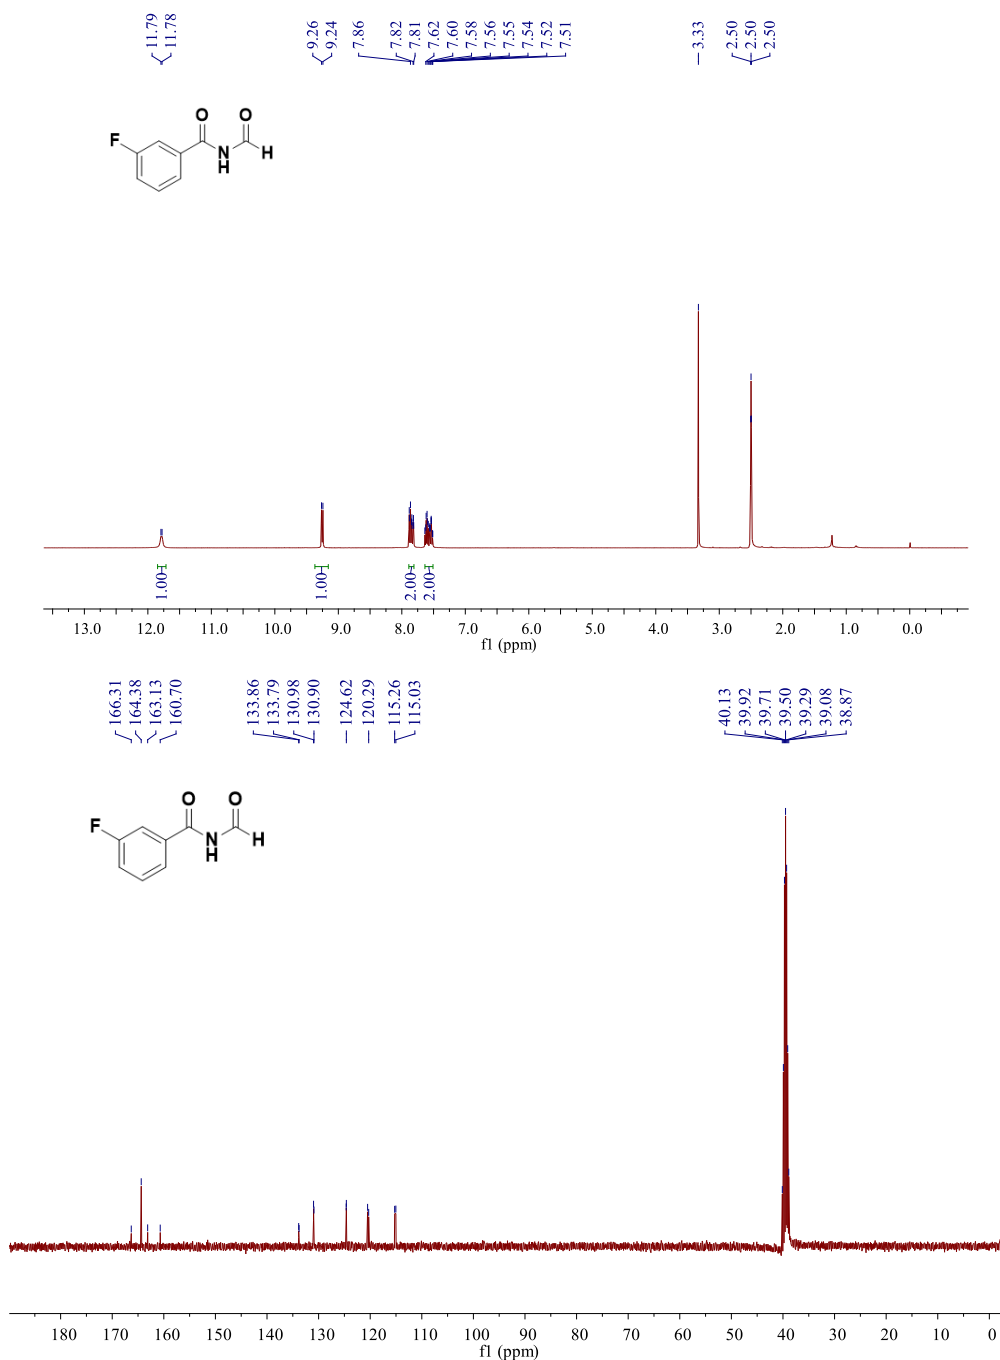

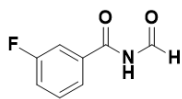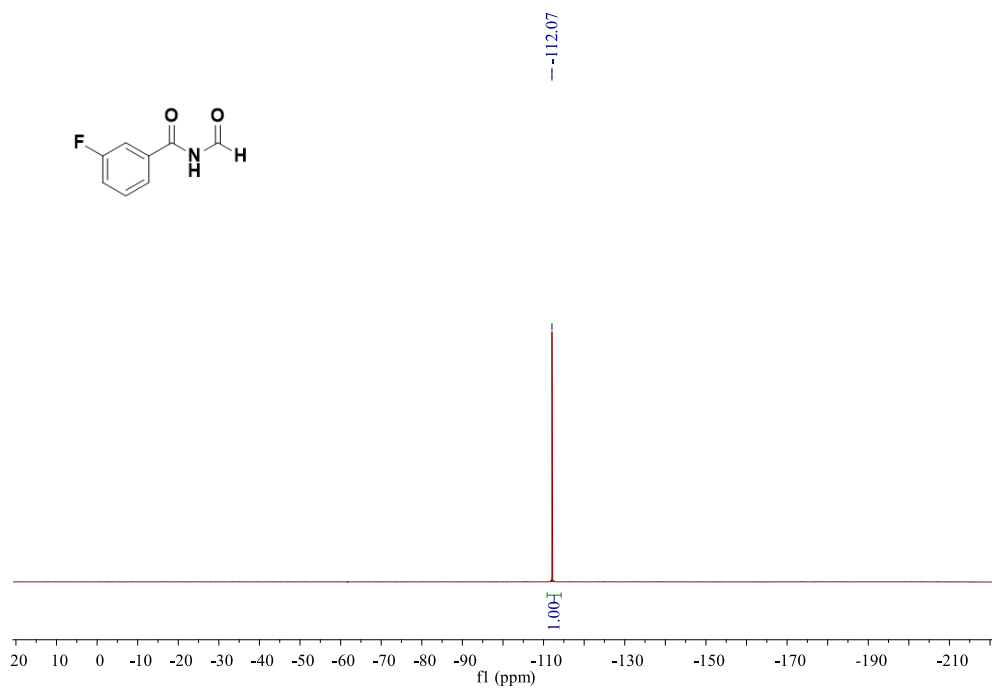

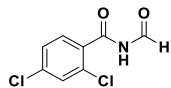

### 2,4-Dichloro-*N*-Formylbenzamide (2bp)

petroleum ether / ethyl acetate = 5:1, white solid, 67% yield (29.1 mg). mp: 150 – 152°C. <sup>1</sup>H NMR (400 MHz, DMSO-*d*<sub>6</sub>) δ 11.75 (d, *J* = 8.7 Hz, 1H), 9.11 (d, *J* = 8.7 Hz, 1H), 7.79 (d, *J* = 2.0 Hz, 1H), 7.67 (d, *J* = 8.3 Hz, 1H), 7.58 (dd, *J* = 8.3, 2.0 Hz, 1H). <sup>13</sup>C NMR (100 MHz, DMSO-*d*<sub>6</sub>) δ 167.02, 163.52, 136.25, 132.52, 131.38, 130.80, 129.57, 127.61. HRMS (ESI-TOF): Anal Calcd. For. C<sub>8</sub>H<sub>5</sub><sup>35</sup>Cl<sub>2</sub>NO<sub>2</sub>+Na<sup>+</sup>: 239.9590, Found: 239.9600. Anal Calcd. For. C<sub>8</sub>H<sub>5</sub><sup>35,37</sup>Cl<sub>2</sub>NO<sub>2</sub>+Na<sup>+</sup>: 241.9560, Found: 241.9588. IR (neat, cm<sup>-1</sup>): ν 3335, 3076, 2871, 1781, 1696, 1599, 1404, 1374, 838, 781.

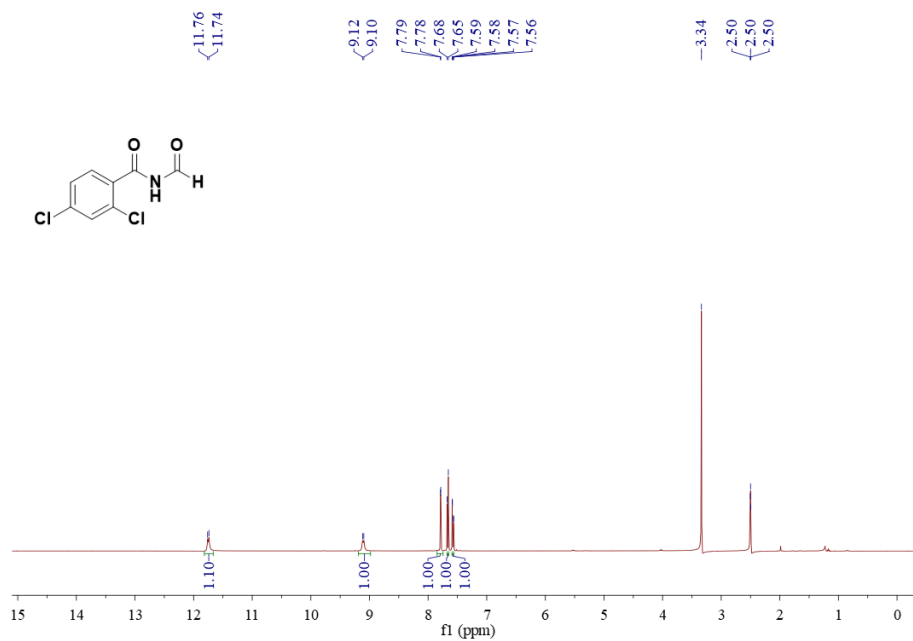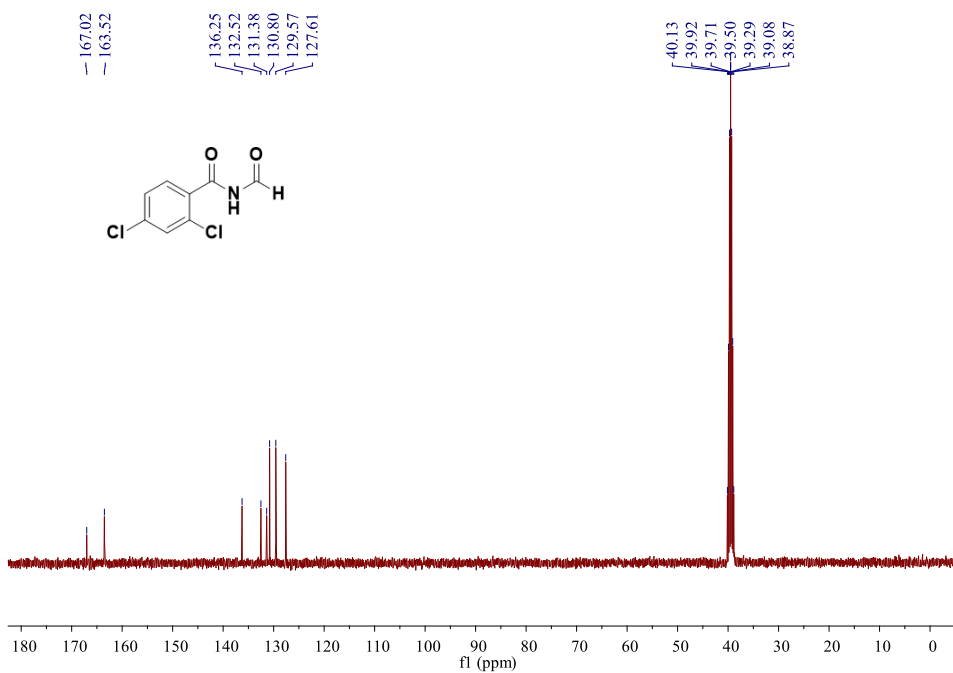

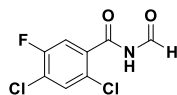

### 2,4-Dichloro-6-fluoro-*N*-formylbenzamide (2bq)

petroleum ether / ethyl acetate = 5:1, yellow solid, 58% yield (27.3 mg). mp: 110 – 112°C. <sup>1</sup>H NMR (400 MHz, DMSO-*d*<sub>6</sub>) δ 11.79 (d, *J* = 6.2 Hz, 1H), 9.10 (s, 1H), 8.00 (d, *J* = 6.5 Hz, 1H), 7.85 (d, *J* = 9.1 Hz, 1H). <sup>13</sup>C NMR (100 MHz, DMSO-*d*<sub>6</sub>) δ 165.87, 163.47, 155.85 (d, *J* = 248.8 Hz), 133.88 (d, *J* = 6.6 Hz), 131.71, 126.29 (d, *J* = 3.7 Hz), 123.15 (d, *J* = 18.9 Hz), 117.71 (d, *J* = 24.9 Hz). <sup>19</sup>F NMR (377 MHz, DMSO-*d*<sub>6</sub>) δ -116.85 (s, 1F). HRMS (ESI-TOF): Anal Calcd. For. C<sub>8</sub>H<sub>4</sub><sup>35</sup>Cl<sub>2</sub>FNO<sub>2</sub>+Na<sup>+</sup>: 257.9495, Found: 257.9487. Anal Calcd. For. C<sub>8</sub>H<sub>4</sub><sup>35,37</sup>Cl<sub>2</sub>FNO<sub>2</sub>+Na<sup>+</sup>: 259.9466, Found: 259.9493. IR (neat, cm<sup>-1</sup>): ν 3295, 2936, 1637, 1552, 1470, 1313, 886.

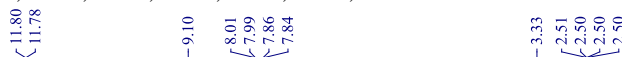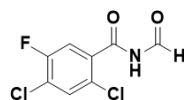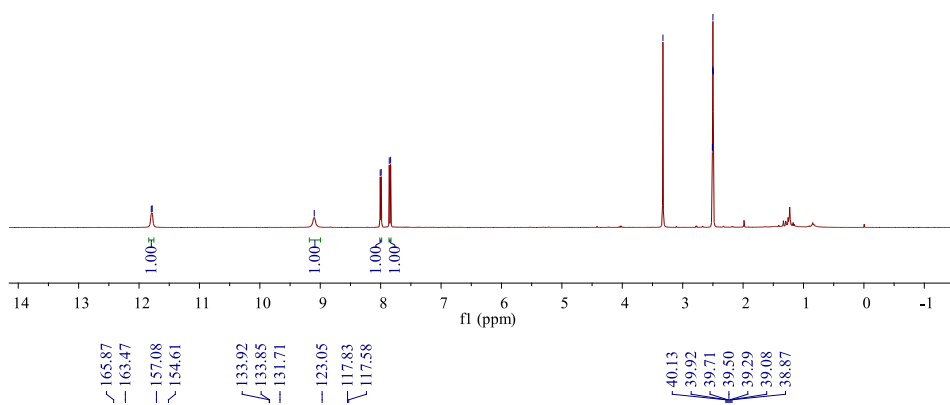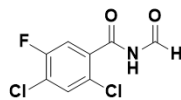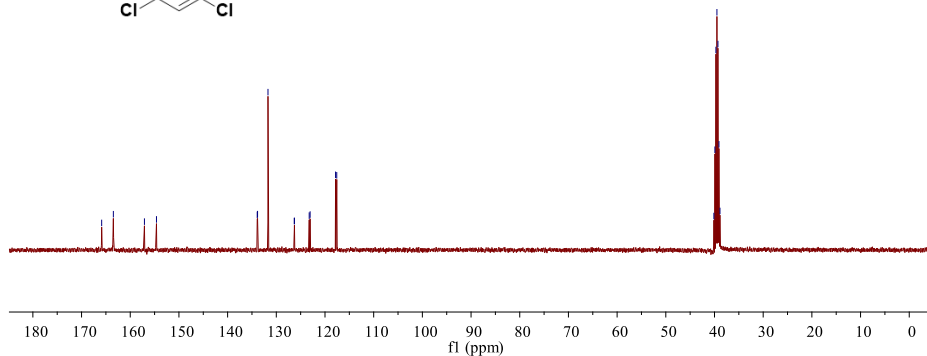

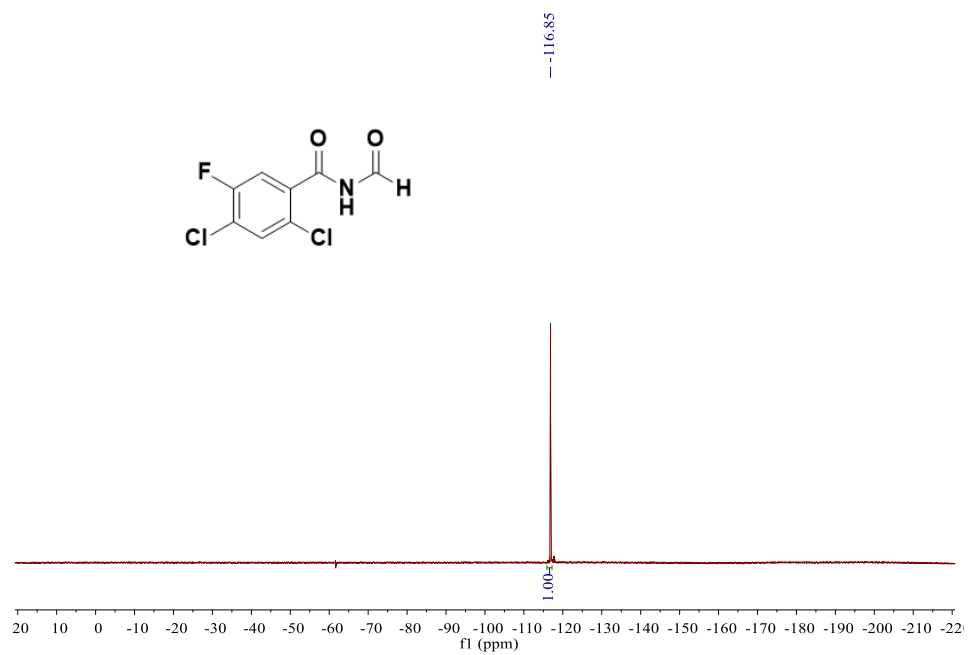

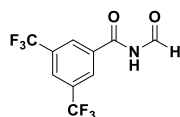

**N-Formyl-3,5-Bis(trifluoromethyl)benzamide (2br)**

petroleum ether / ethyl acetate = 5:1, light yellow solid, 62% yield (35.3 mg). mp: 49 – 51°C. <sup>1</sup>H NMR (400 MHz, DMSO-*d*<sub>6</sub>) δ 12.10 (d, *J* = 7.9 Hz, 1H), 9.28 (d, *J* = 8.4 Hz, 1H), 8.63 (s, 2H), 8.43 (s, 1H). <sup>13</sup>C NMR (75 MHz, DMSO-*d*<sub>6</sub>) δ 165.15, 164.23, 134.13, 130.76 (q, *J* = 33.6 Hz), 129.19 (q, *J* = 3.0 Hz), 126.62 (m), 122.93 (q, *J* = 273.0 Hz). <sup>19</sup>F NMR (377 MHz, DMSO-*d*<sub>6</sub>) δ -61.50 (s, 6F). HRMS (ESI-TOF): Anal Calcd. For. C<sub>10</sub>H<sub>5</sub>F<sub>6</sub>NO<sub>2</sub>+Na<sup>+</sup>: 308.0117, Found: 308.0117. IR (neat, cm<sup>-1</sup>): ν 3335, 3075, 2871, 1701, 1635, 1570, 1486, 1322, 878.

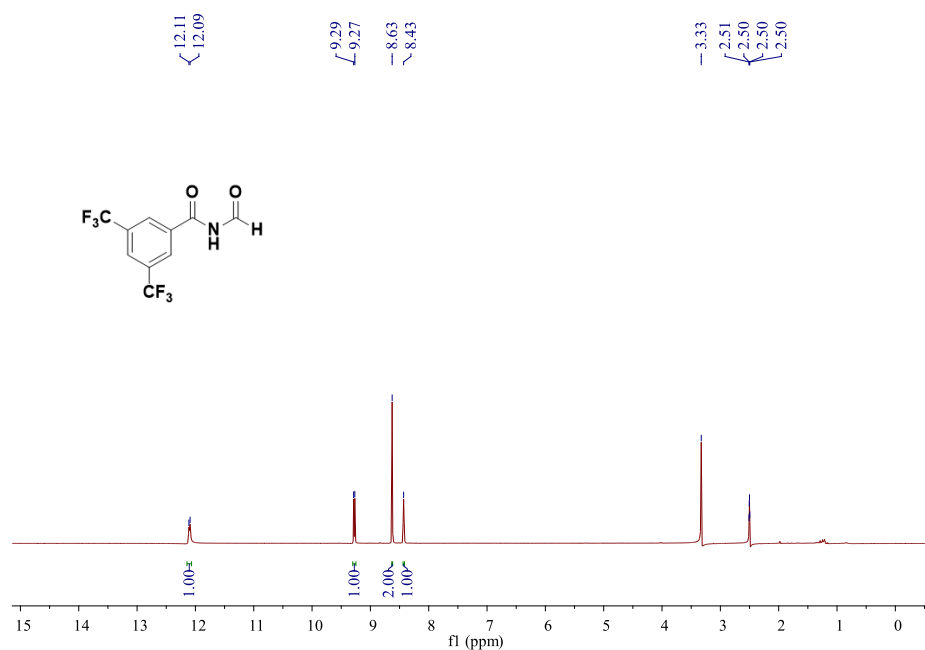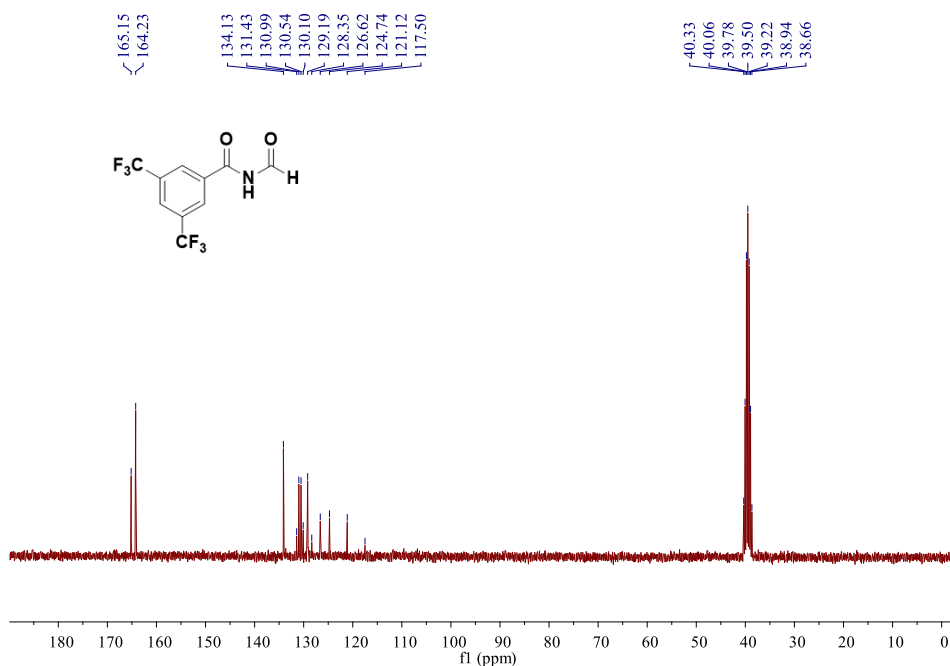



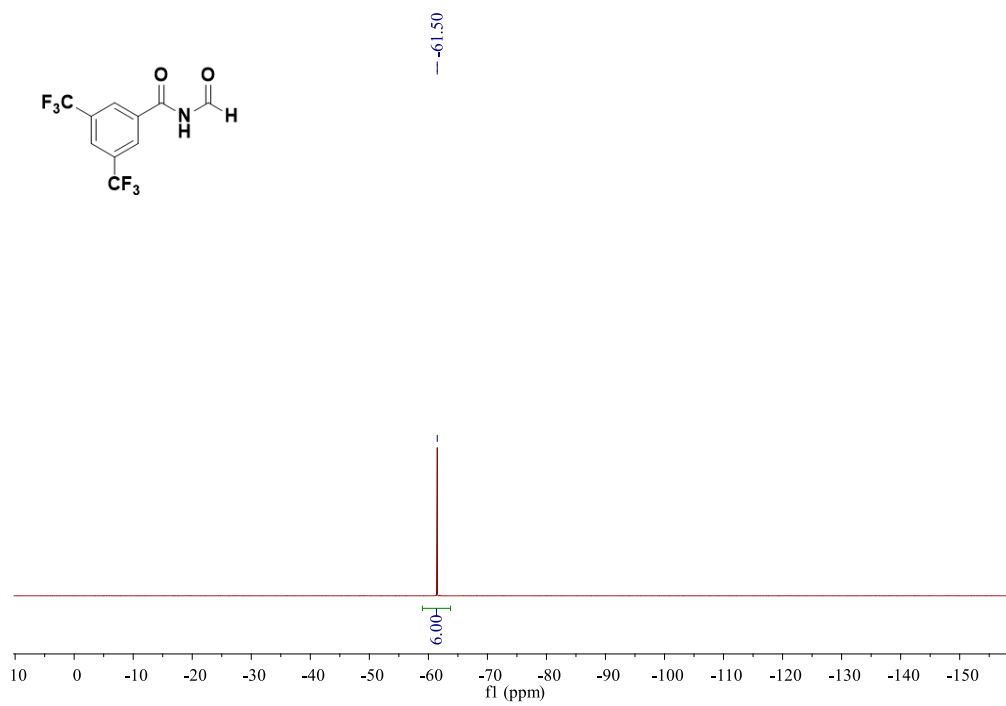

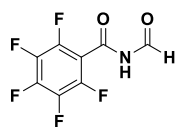

### 2,3,4,5,6-Pentafluoro-*N*-Formylbenzamide (2bs)

petroleum ether / ethyl acetate = 5:1, yellow oil, 63% yield (30.1 mg).  $^1\text{H NMR}$  (400 MHz,  $\text{DMSO-}d_6$ )  $\delta$  12.11 (s, 1H), 9.13 (s, 1H).  $^{13}\text{C NMR}$  (100 MHz,  $\text{DMSO-}d_6$ )  $\delta$  163.07, 158.98, 146.66 (m), 142.46 (m), 137.20 (m), 109.79 (m).  $^{19}\text{F NMR}$  (377 MHz,  $\text{DMSO-}d_6$ )  $\delta$  -140.53 (d,  $J = 19.4$  Hz, 2F), -149.85 (s, 1F), -160.69 (t,  $J = 19.4$  Hz, 2F). **HRMS** (ESI-TOF): Anal Calcd. For.  $\text{C}_8\text{H}_2\text{F}_5\text{NO}_2 + \text{Na}^+$ : 261.9898, Found: 261.9878. **IR** (neat,  $\text{cm}^{-1}$ ):  $\nu$  3396, 3242, 2960, 2850, 1729, 1673, 1503, 1379.

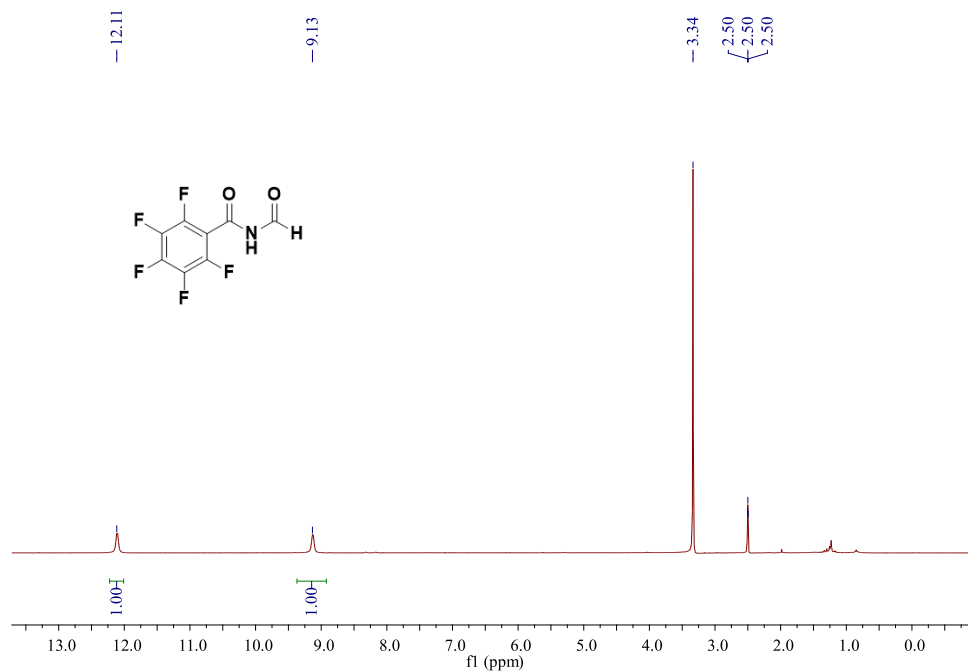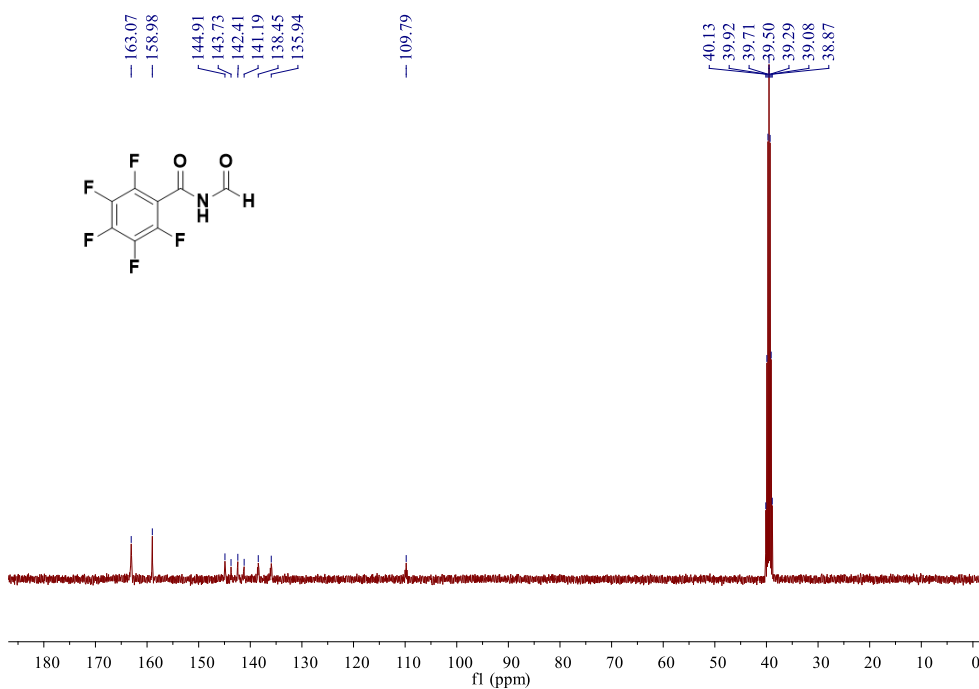

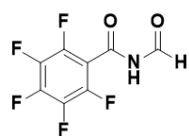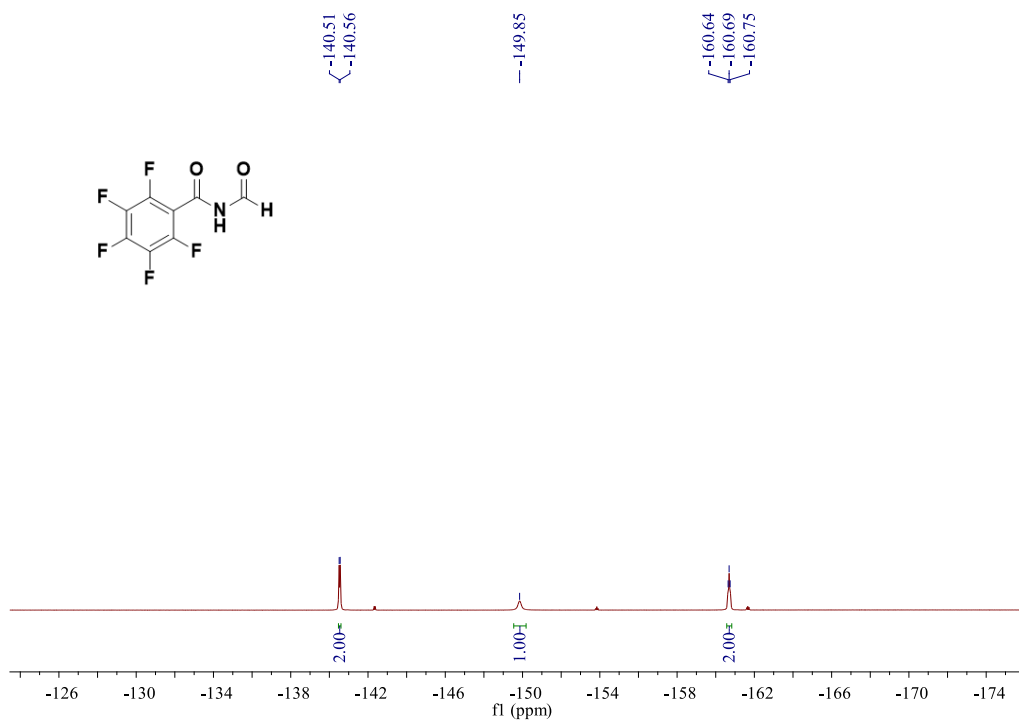

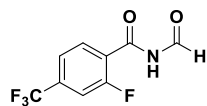

### 2-Fluoro-N-formyl-4-(trifluoromethyl)benzamide (2bt)

petroleum ether / ethyl acetate = 5:1, yellow solid, 67% yield (31.5 mg). mp: 108 – 110°C. <sup>1</sup>H NMR (400 MHz, DMSO-*d*<sub>6</sub>) δ 11.80 (d, *J* = 8.6 Hz, 1H), 9.17 (d, *J* = 9.0 Hz, 1H), 7.92 (dd, *J* = 17.5, 9.4 Hz, 2H), 7.74 (d, *J* = 8.0 Hz, 1H). <sup>13</sup>C NMR (100 MHz, DMSO-*d*<sub>6</sub>) δ 164.70, 163.42, 159.19 (d, *J* = 254.6 Hz), 133.73 (q, *J* = 33.1 Hz), 131.64 (d, *J* = 2.5 Hz), 125.79 (d, *J* = 15.0 Hz), 124.21 (d, *J* = 3.0 Hz), 121.64 (t, *J* = 4.0 Hz), 114.15 (m). <sup>19</sup>F NMR (377 MHz, DMSO-*d*<sub>6</sub>) δ -61.72 (s, 3F), -110.78 (s, 1F). HRMS (ESI-TOF): Anal Calcd. For. C<sub>9</sub>H<sub>5</sub>F<sub>4</sub>NO<sub>2</sub>+Na<sup>+</sup>: 258.0149, Found: 258.0190. IR (neat, cm<sup>-1</sup>): ν 3265, 3056, 2851, 1642, 1507, 1409, 878, 779.

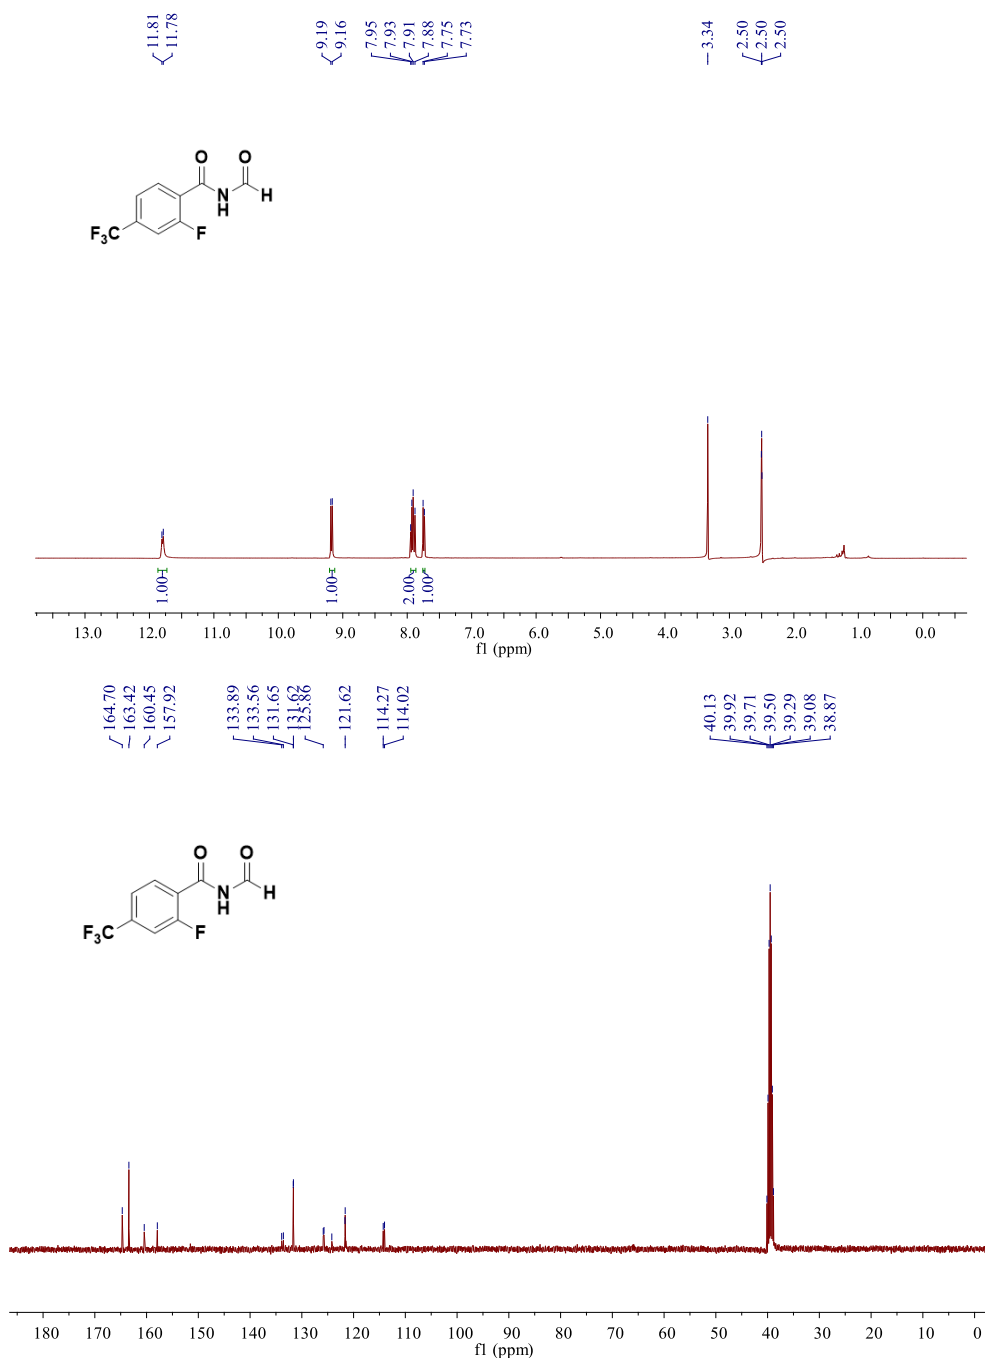

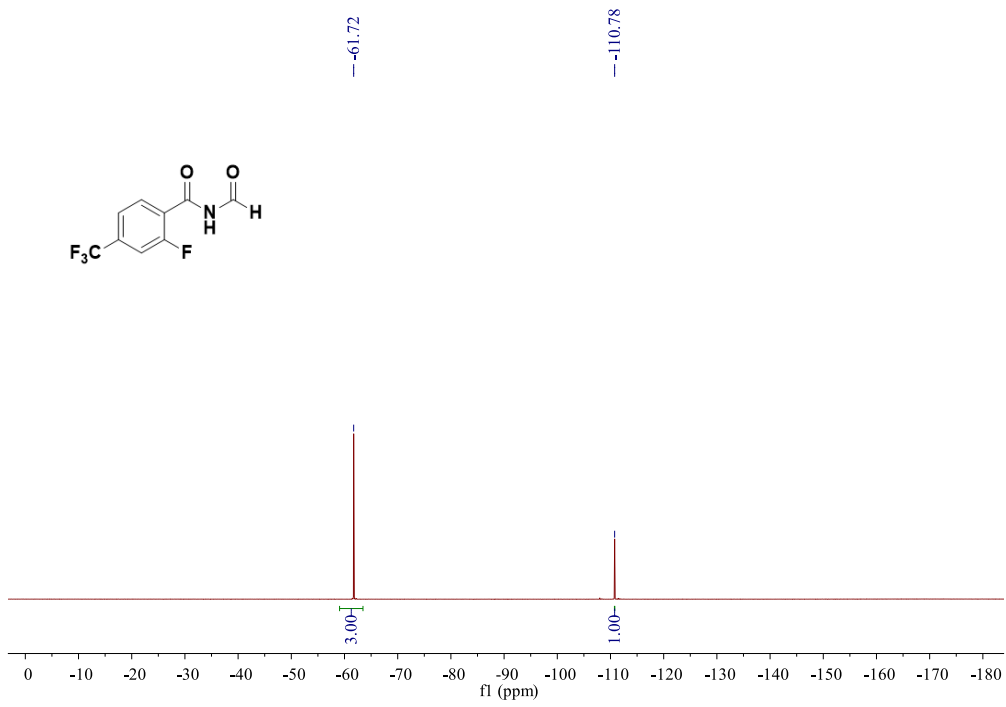

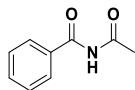

### *N*-Acetylbenzamide (2bu)

petroleum ether / ethyl acetate = 5:1, white solid, 68% yield (22.2 mg). mp: 107 – 109°C. <sup>1</sup>H NMR (400 MHz, DMSO-*d*<sub>6</sub>) δ 11.00 (s, 1H), 7.93 – 7.90 (m, 2H), 7.64 – 7.60 (m, 1H), 7.53 – 7.49 (m, 2H), 2.35 (s, 3H). <sup>13</sup>C NMR (100 MHz, DMSO-*d*<sub>6</sub>) δ 172.16, 166.50, 133.18, 132.69, 128.44, 128.35, 25.58. HRMS (ESI-TOF): Anal Calcd. For. C<sub>9</sub>H<sub>9</sub>NO<sub>2</sub> +Na<sup>+</sup>: 186.0525, Found: 186.0526. IR (neat, cm<sup>-1</sup>): ν 3300, 2984, 1736, 1568, 1466, 1330, 760, 634.

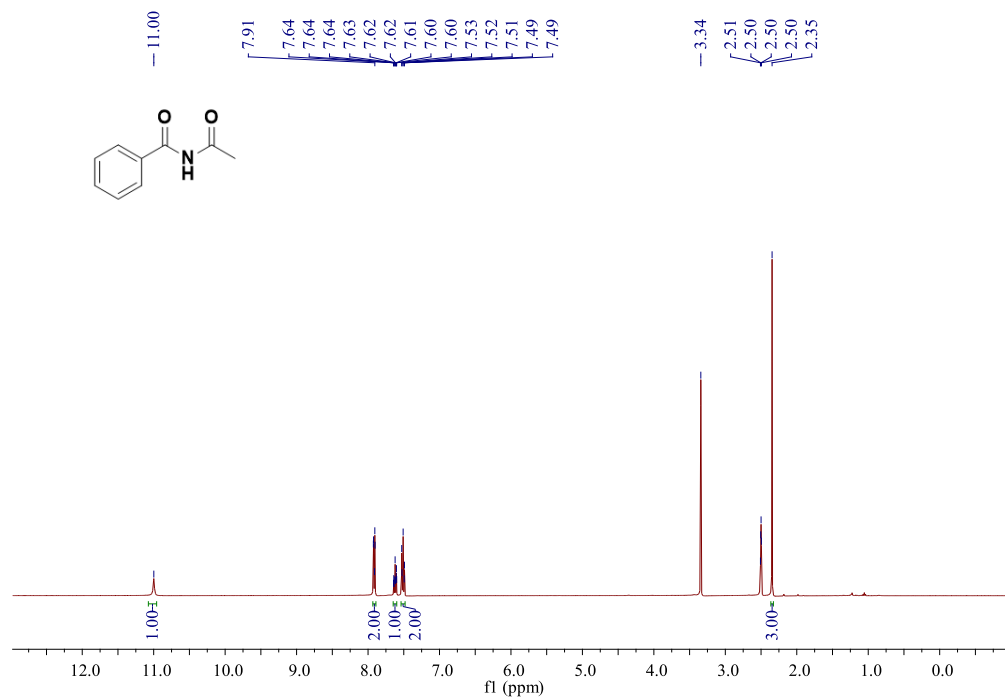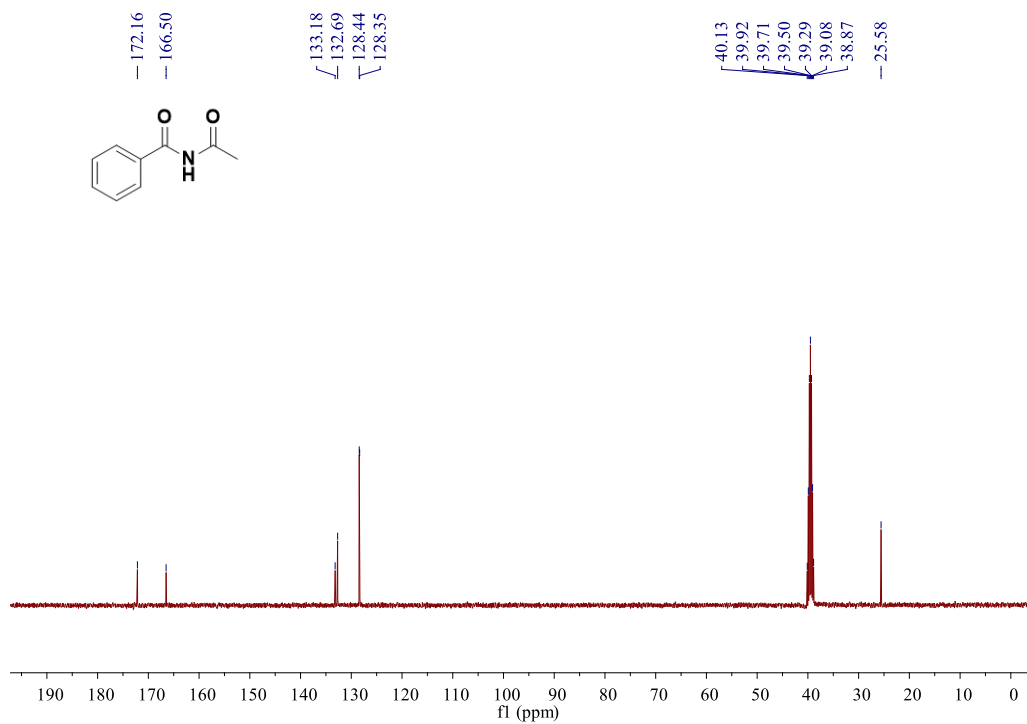

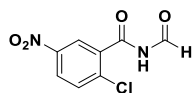

### 2-Chloro-N-Formyl-5-Nitrobenzamide (2bv)

petroleum ether / ethyl acetate = 2:1, white solid, 41% yield (18.7 mg). mp: 53 – 55°C.  $^1\text{H NMR}$  (400 MHz, DMSO-*d*6)  $\delta$  11.88 (s, 1H), 9.12 (s, 1H), 8.55 (d,  $J = 2.8$  Hz, 1H), 8.37 (dd,  $J = 8.8, 2.8$  Hz, 1H), 7.90 (d,  $J = 8.8$  Hz, 1H).  $^{13}\text{C NMR}$  (100 MHz, DMSO-*d*6)  $\delta$  165.94, 163.45, 146.03, 136.97, 134.71, 131.56, 126.77, 124.55. **HRMS** (ESI-TOF): Anal Calcd. For.  $\text{C}_8\text{H}_5^{35}\text{ClN}_2\text{O}_4 + \text{Na}^+$ : 250.9830, Found: 250.9835. Anal Calcd. For.  $\text{C}_8\text{H}_5^{37}\text{ClN}_2\text{O}_4 + \text{Na}^+$ : 252.9801, Found: 252.9781. **IR** (neat,  $\text{cm}^{-1}$ ):  $\nu$  3334, 3090, 2935, 1702, 1549, 1403, 1323, 863, 781.

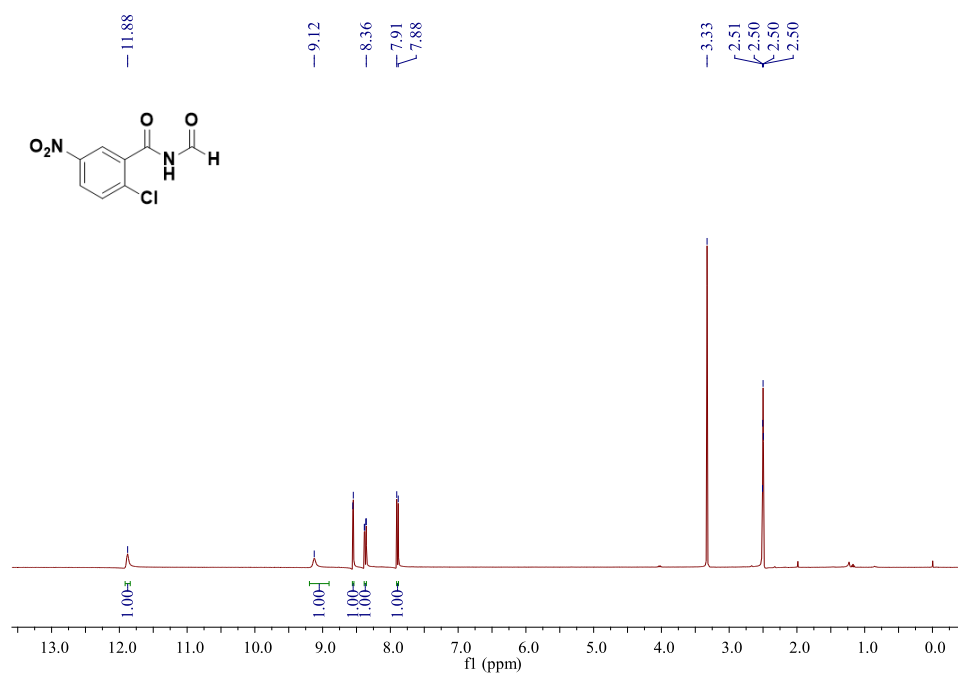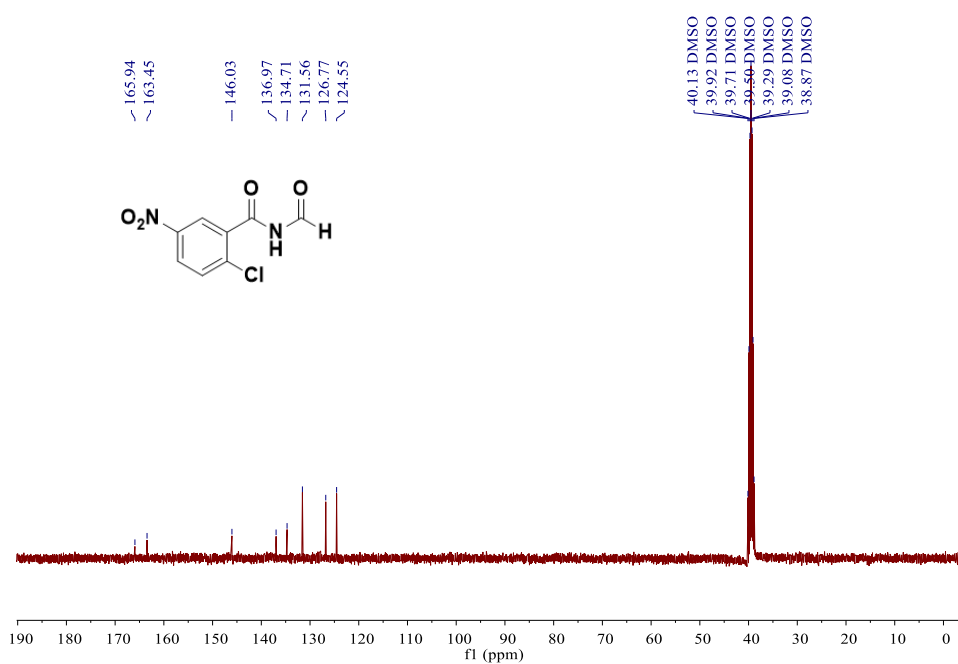

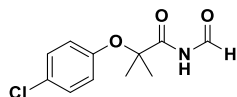

### 2-(4-chlorophenoxy)-*N*-Formyl-2-Methylpropanamide (2bw)

petroleum ether / ethyl acetate = 5:1, yellow solid, 46% yield (22.2 mg). mp: 45 – 47°C.  $^1\text{H NMR}$  (400 MHz,  $\text{DMSO-}d_6$ )  $\delta$  11.45 (d,  $J = 9.0$  Hz, 1H), 9.11 (d,  $J = 9.0$  Hz, 1H), 7.35 – 7.33 (m, 2H), 6.94 – 6.92 (m, 2H), 1.49 (s, 6H).  $^{13}\text{C NMR}$  (100 MHz,  $\text{DMSO-}d_6$ )  $\delta$  175.49, 163.71, 153.22, 129.19, 126.51, 121.52, 80.19, 23.79. **HRMS** (ESI-TOF): Anal Calcd. For.  $\text{C}_{11}\text{H}_{12}^{35}\text{ClNO}_3 + \text{Na}^+$ : 264.0398, Found: 264.0397. Anal Calcd. For.  $\text{C}_{11}\text{H}_{12}^{37}\text{ClNO}_3 + \text{Na}^+$ : 266.0368, Found: 266.0366. **IR** (neat,  $\text{cm}^{-1}$ ):  $\nu$  3069, 2917, 1741, 1698, 1594, 1450, 1382, 840, 790.

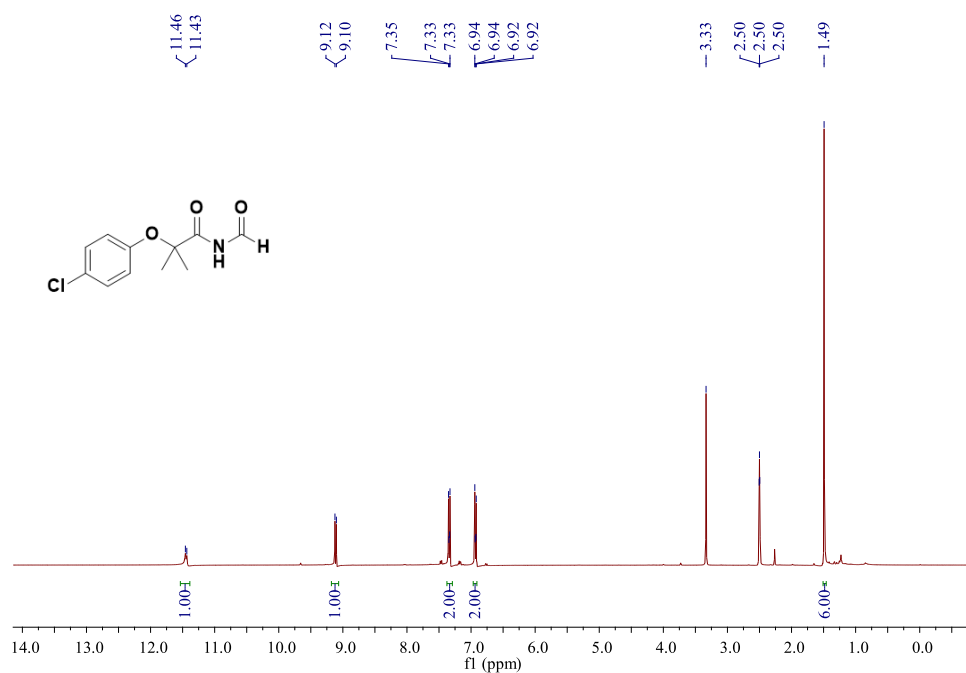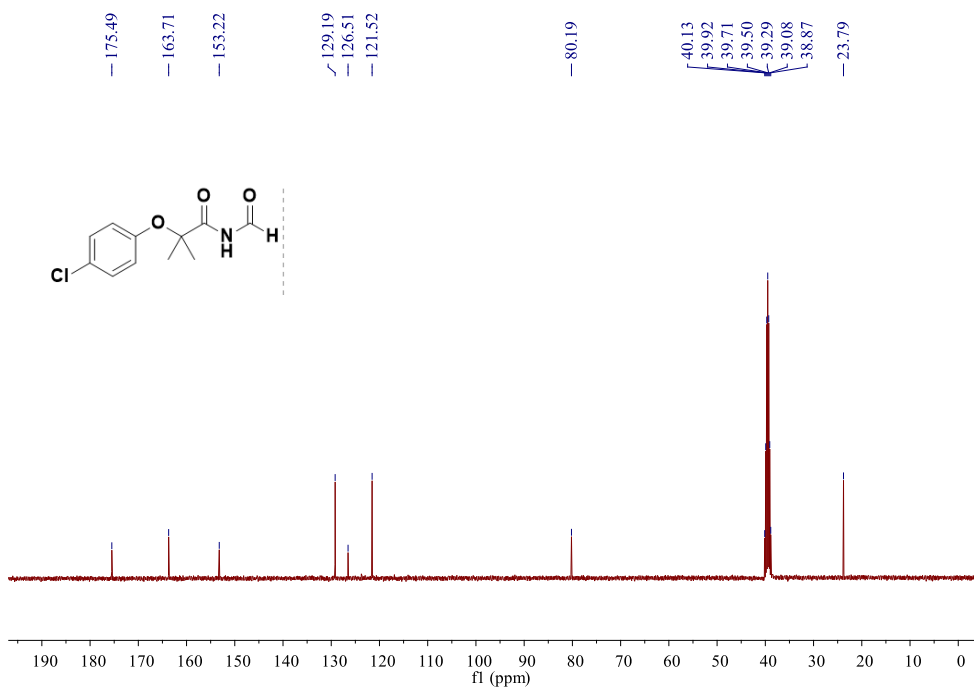



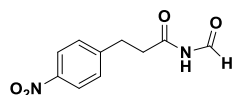

**N-Formyl-3-(4-nitrophenyl)Propenamide (2bx)**

petroleum ether / ethyl acetate = 2:1, yellow solid, 39% yield (17.3 mg). mp: 112 – 114°C. <sup>1</sup>H NMR (400 MHz, DMSO-*d*<sub>6</sub>) δ 11.17 (d, *J* = 8.5 Hz, 1H), 8.98 (d, *J* = 9.5 Hz, 1H), 8.17 – 8.15 (m, 2H), 7.53 – 7.51 (m, 2H), 3.00 (t, *J* = 7.5 Hz, 2H), 2.74 (t, *J* = 7.5 Hz, 2H). <sup>13</sup>C NMR (100 MHz, DMSO-*d*<sub>6</sub>) δ 173.30, 163.12, 149.04, 146.02, 129.65, 123.46, 36.13, 29.18. HRMS (ESI-TOF): Anal Calcd. For. C<sub>10</sub>H<sub>10</sub>N<sub>2</sub>O<sub>4</sub>+Na<sup>+</sup>: 245.0533, Found: 245.0537. IR (neat, cm<sup>-1</sup>): ν 3290, 3104, 2939, 1635, 1559, 1452, 1343, 855, 747.

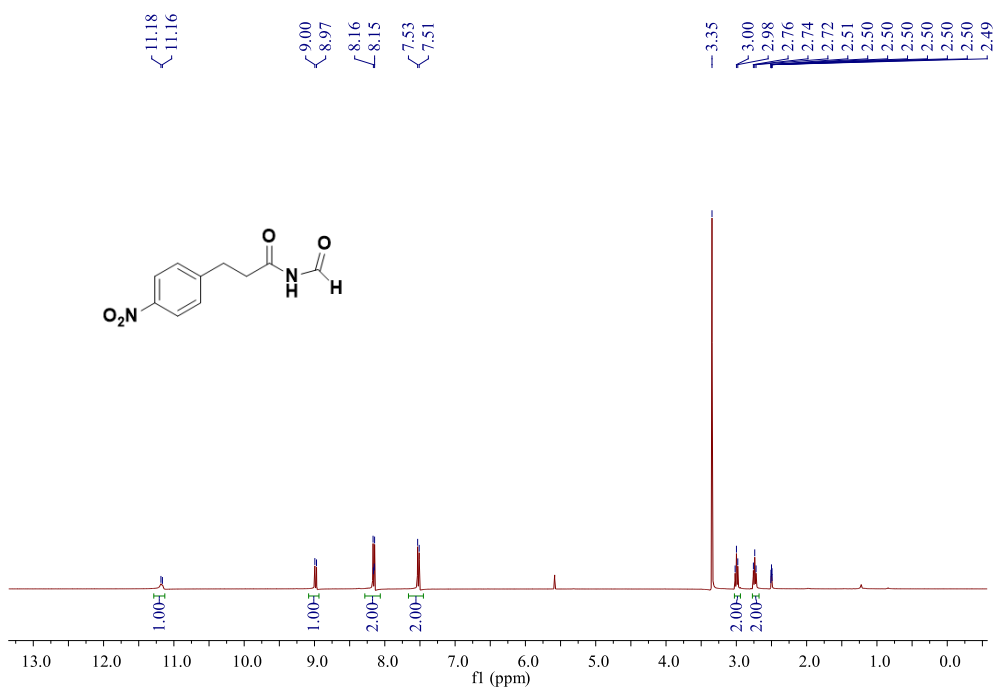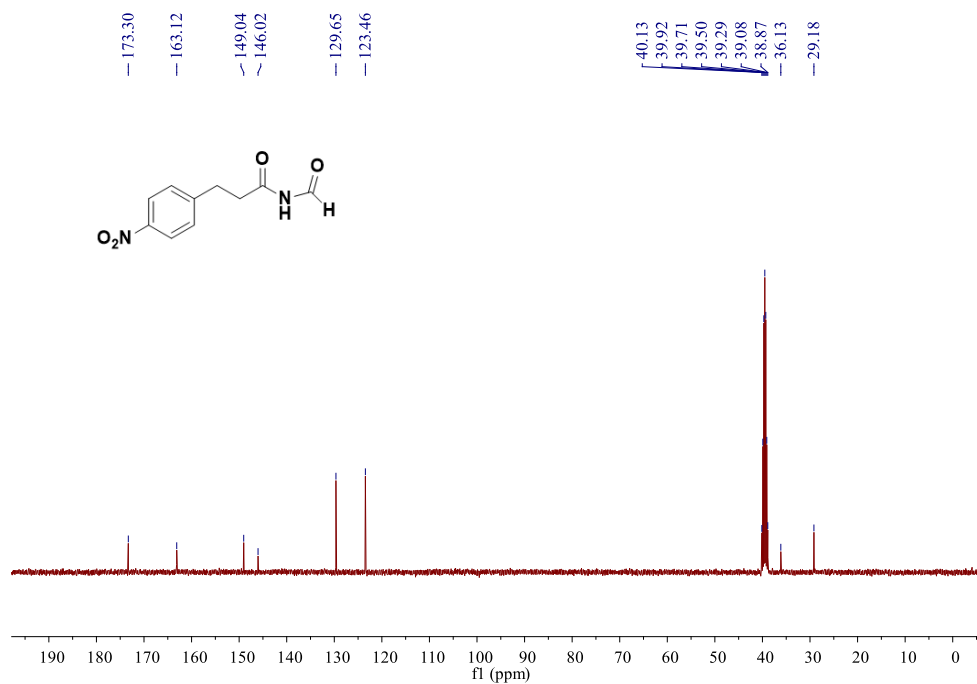

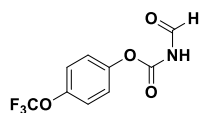

#### 4-(trifluoromethoxy)Phenyl-Formylcarbamate (2by)

petroleum ether / ethyl acetate = 5:1, yellow solid, 66% yield (32.9 mg). mp: 56 – 58°C.  $^1\text{H NMR}$  (400 MHz,  $\text{CDCl}_3$ )  $\delta$  9.06 (d,  $J = 10.0$  Hz, 1H), 8.15 (s, 1H), 7.29 – 7.21 (m, 4H).  $^{13}\text{C NMR}$  (75 MHz,  $\text{DMSO-}d_6$ )  $\delta$  164.02, 152.13, 148.36, 145.98, 123.74, 122.41, 120.05 (q,  $J = 256.3$  Hz).  $^{19}\text{F NMR}$  (377 MHz,  $\text{DMSO-}d_6$ )  $\delta$  -57.12 (s, 3F). **HRMS** (ESI-TOF): Anal Calcd. For.  $\text{C}_9\text{H}_6\text{F}_3\text{NO}_4 + \text{Na}^+$ : 272.0141, Found: 272.0144. **IR** (neat,  $\text{cm}^{-1}$ ):  $\nu$  3295, 2945, 1781, 1693, 1599, 1489, 1343, 1261, 836, 796.

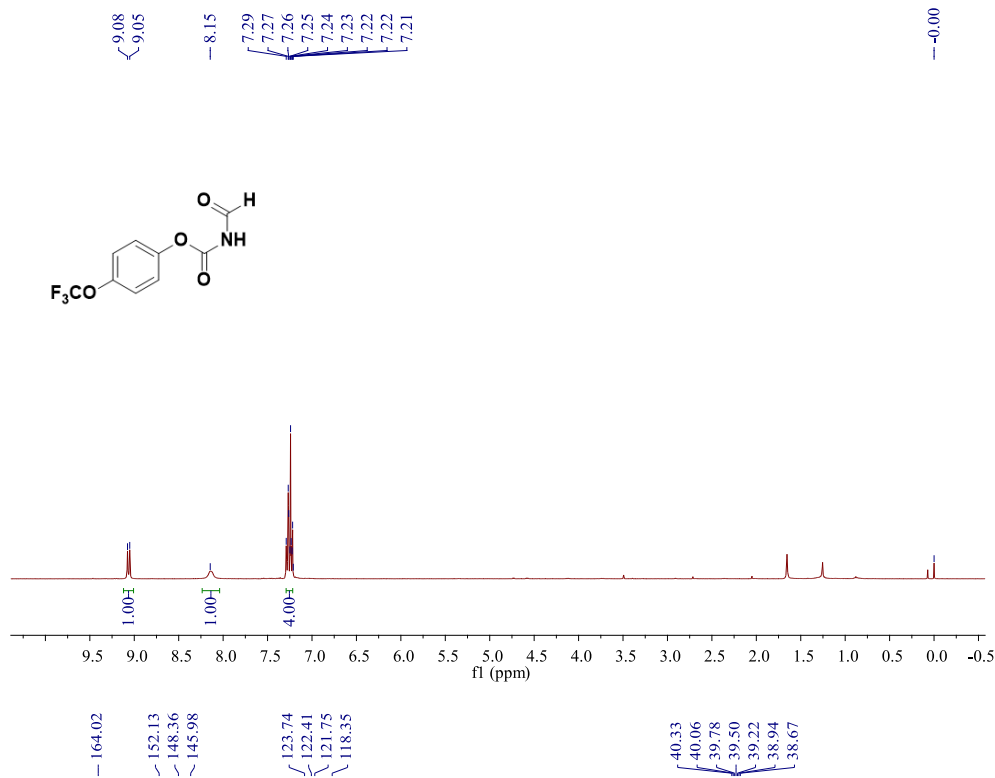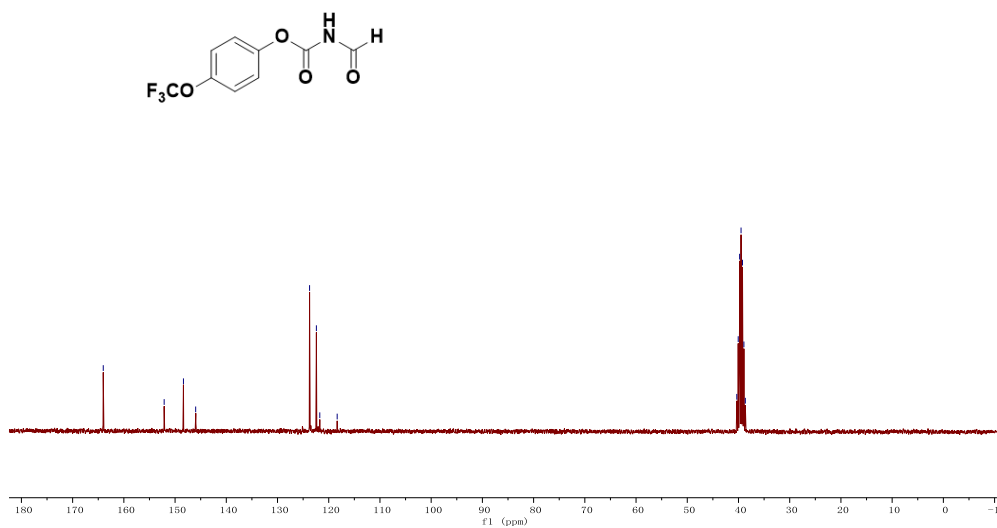

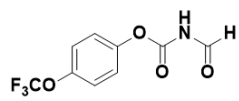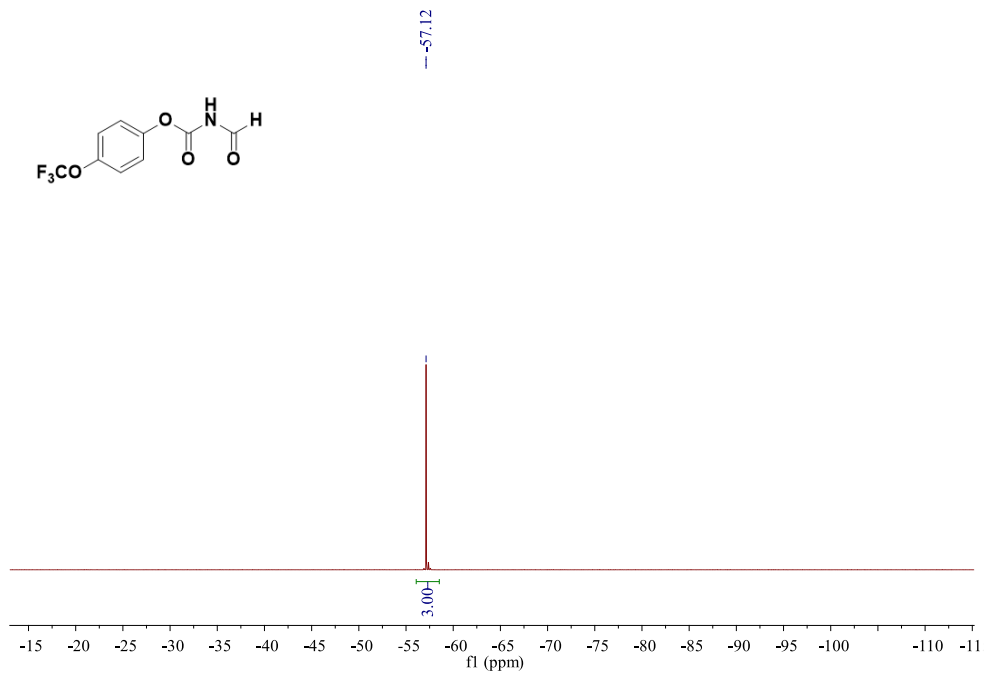

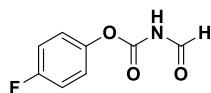

#### 4-Fluorophenyl Formylcarbamate (2bz)

petroleum ether / ethyl acetate = 5:1, yellow solid, 74% yield (26.7 mg). mp: 61 – 63°C. <sup>1</sup>H NMR (300 MHz, DMSO-*d*<sub>6</sub>) δ 11.47 (s, 1H), 8.94 (s, 1H), 7.34 – 7.24 (m, 4H). <sup>13</sup>C NMR (75 MHz, DMSO-*d*<sub>6</sub>) δ 164.06, 161.43, 155.29 (d, *J* = 442.8 Hz), 145.81 (d, *J* = 2.7 Hz), 123.68 (d, *J* = 8.8 Hz), 116.21 (d, *J* = 23.6 Hz). <sup>19</sup>F NMR (377 MHz, DMSO-*d*<sub>6</sub>) δ -116.60 (s, 1F). HRMS (ESI-TOF): Anal Calcd. For. C<sub>8</sub>H<sub>6</sub>FNO<sub>3</sub>+Na<sup>+</sup>: 206.0224, Found: 206.0201. IR (neat, cm<sup>-1</sup>): ν 3391, 2916, 2848, 1769, 1600, 1496, 1380, 1212, 825, 757.

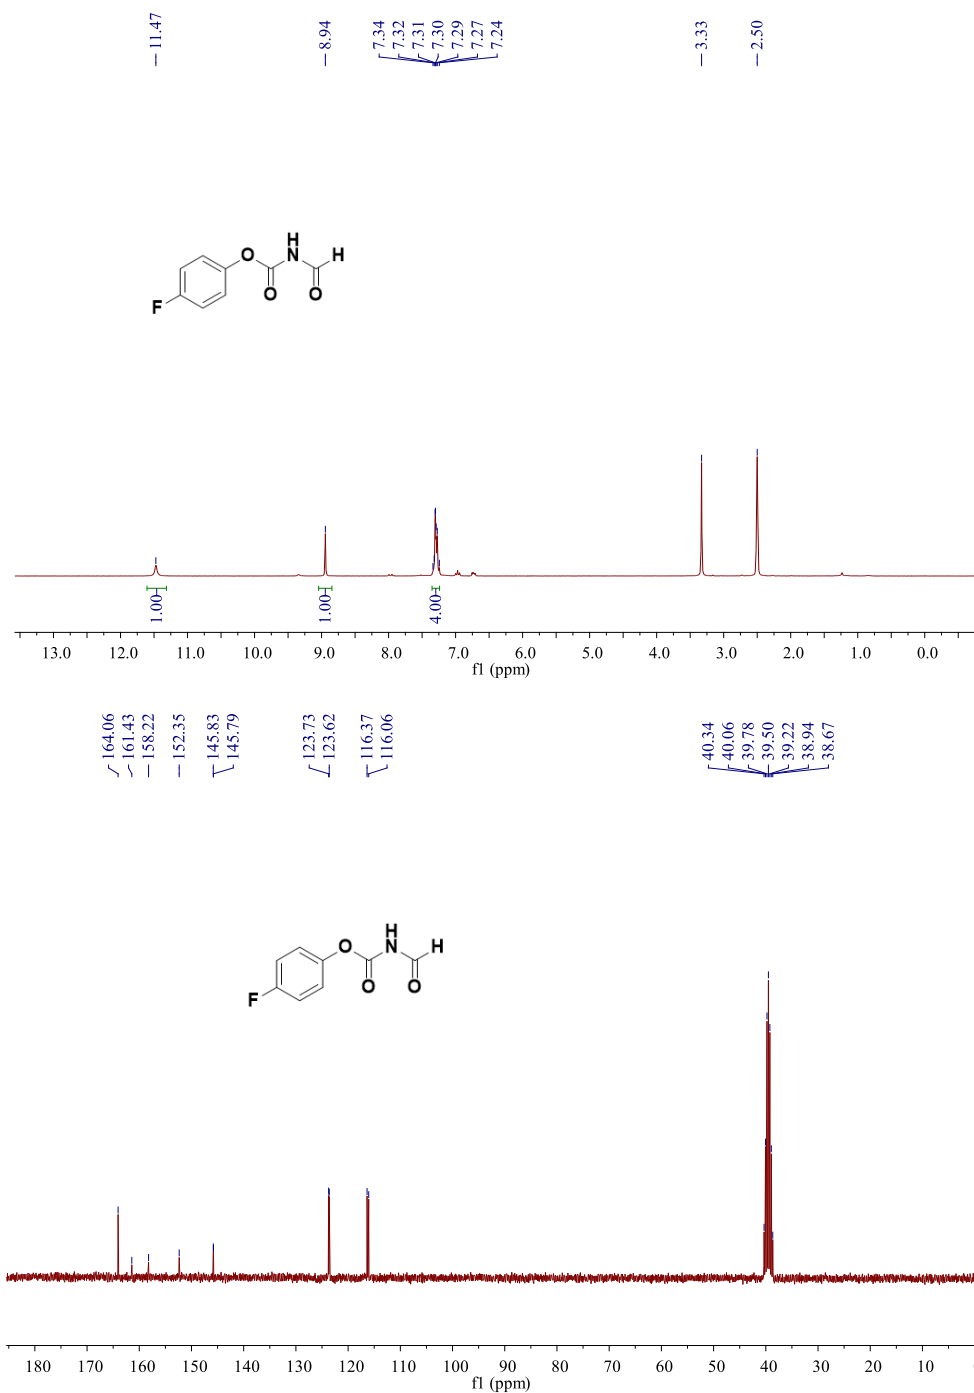

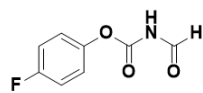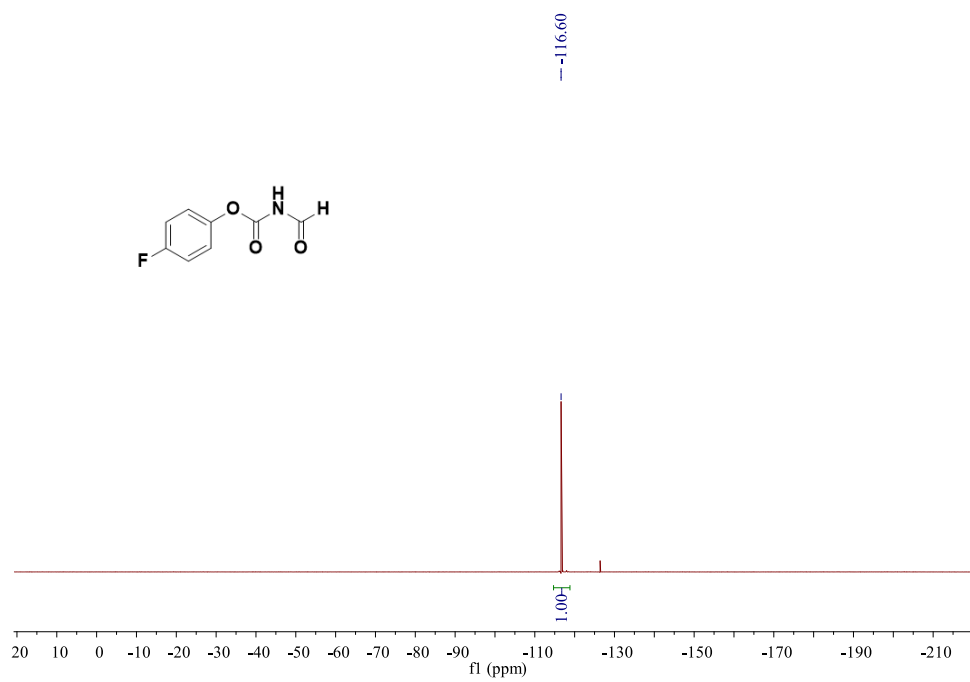

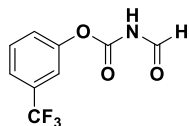

### 3-(Trifluoromethyl)phenyl Formylcarbamate (2ca)

petroleum ether / ethyl acetate = 5:1, yellow solid, 70% yield (31.7 mg). mp: 95 – 97°C.  $^1\text{H NMR}$  (400 MHz, DMSO-*d*<sub>6</sub>)  $\delta$  11.58 (d,  $J = 9.3$  Hz, 1H), 8.97 (d,  $J = 9.3$  Hz, 1H), 7.74 – 7.68 (m, 3H), 7.62 – 7.59 (m, 1H).  $^{13}\text{C NMR}$  (100 MHz, DMSO-*d*<sub>6</sub>)  $\delta$  164.04, 152.05, 149.97, 130.96, 130.28 (q,  $J = 32.1$  Hz), 126.25, 123.58 (q,  $J = 270.8$  Hz), 123.07 (d,  $J = 4.0$  Hz), 119.16 (d,  $J = 4.0$  Hz).  $^{19}\text{F NMR}$  (377 MHz, DMSO-*d*<sub>6</sub>)  $\delta$  -61.16 (s, 3F). **HRMS** (ESI-TOF): Anal Calcd. For. C<sub>9</sub>H<sub>6</sub>F<sub>3</sub>NO<sub>3</sub> + Na<sup>+</sup>: 256.0192, Found: 256.0192. **IR** (neat, cm<sup>-1</sup>):  $\nu$  3332, 2959, 1779, 1695, 1483, 1253, 914, 807, 759.

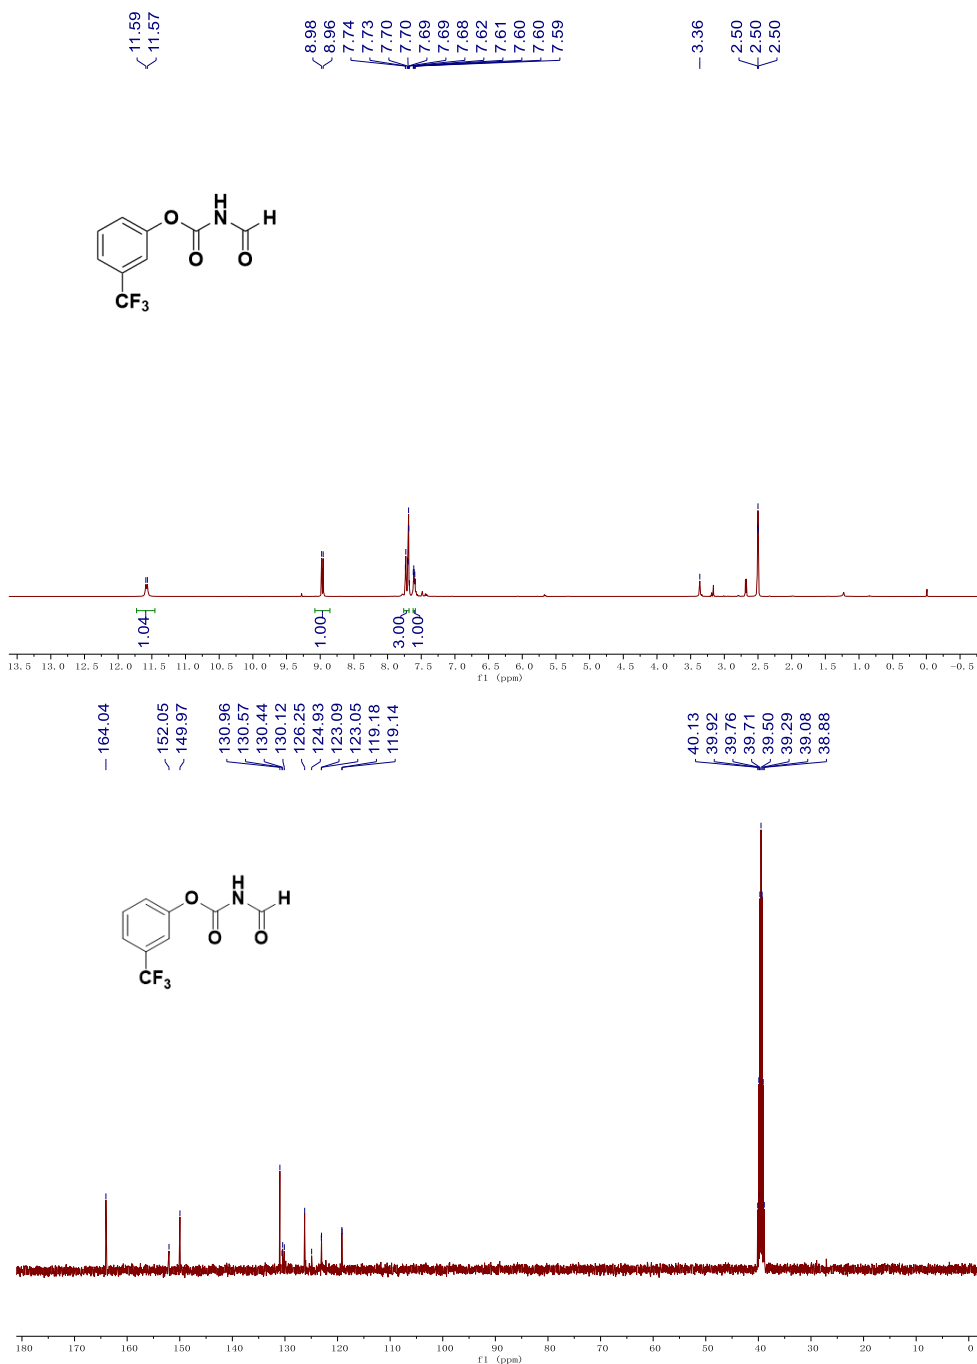

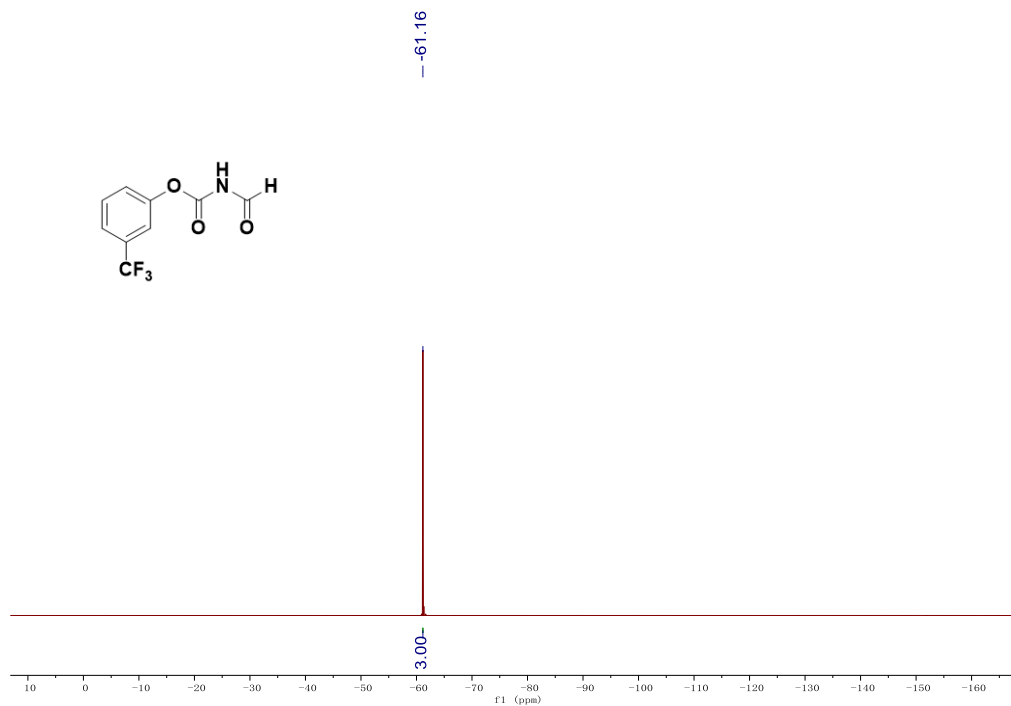

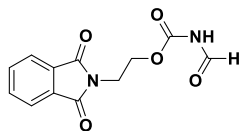

**2-(1,3-dioxoisindolin-2-yl)Ethyl Formylcarbamate (2cb)**

petroleum ether / ethyl acetate = 2:1, white solid, 62% yield (32.5 mg). mp: 87 – 89°C.  $^1\text{H NMR}$  (400 MHz, DMSO-*d*6)  $\delta$  10.95 (d,  $J = 9.5$  Hz, 1H), 8.78 (d,  $J = 9.5$  Hz, 1H), 7.88 – 7.83 (m, 4H), 4.36 (t,  $J = 5.3$  Hz, 2H), 3.88 (t,  $J = 5.3$  Hz, 2H).  $^{13}\text{C NMR}$  (100 MHz, DMSO-*d*6)  $\delta$  167.76, 163.89, 153.38, 134.52, 131.55, 123.17, 62.80, 36.69. **HRMS** (ESI-TOF): Anal Calcd. For.  $\text{C}_{12}\text{H}_{10}\text{N}_2\text{O}_5 + \text{Na}^+$ : 285.0482, Found: 285.0484. **IR** (neat,  $\text{cm}^{-1}$ ):  $\nu$  3386, 3270, 1761, 1689, 1358, 1192, 825, 715.

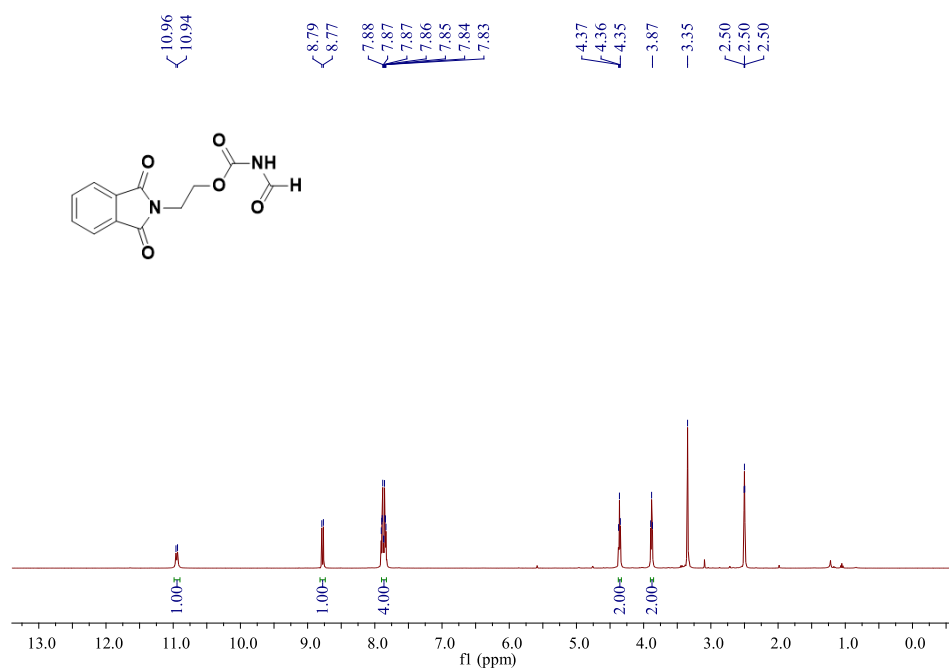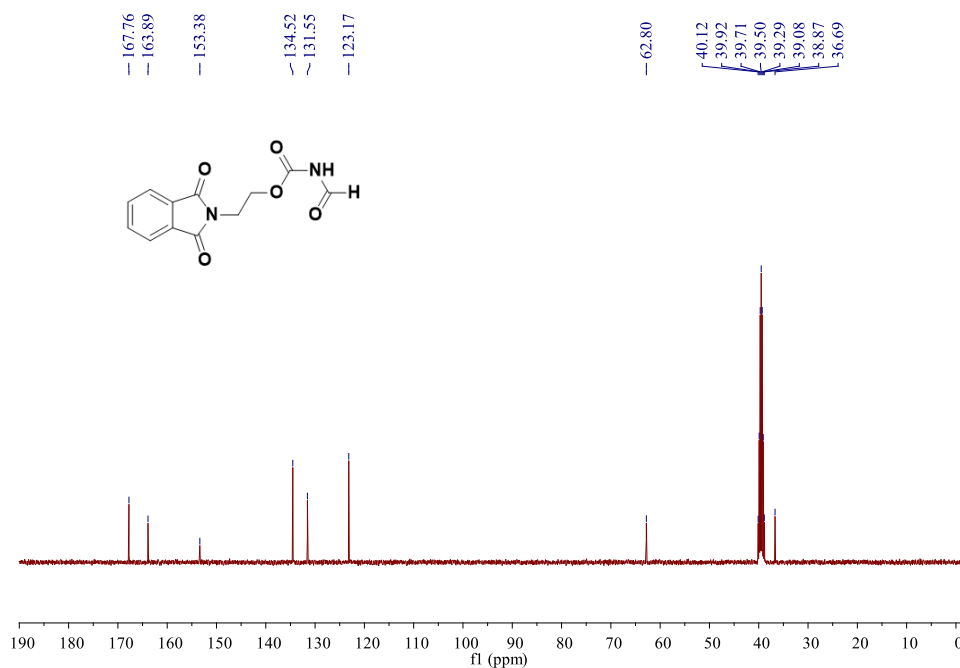



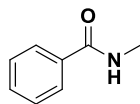

***N*-methylbenzamide (3a)**

petroleum ether / ethyl acetate = 2:1, white solid, 90% yield (23.7 mg). mp: 70 –72°C. <sup>1</sup>H NMR (400 MHz, CDCl<sub>3</sub>) δ 7.79 – 7.77 (m, 2H), 7.46 – 7.42 (m, 1H), 7.37 – 7.33 (m, 2H), 7.09 (s, 1H), 2.94 (d, *J* = 4.8 Hz, 2H). <sup>13</sup>C NMR (100 MHz, CDCl<sub>3</sub>) δ 168.42, 134.34, 131.10, 128.25, 126.79, 26.63. HRMS (ESI-TOF): Anal Calcd. For. C<sub>8</sub>H<sub>9</sub>NO+Na<sup>+</sup>: 136.0576, Found: 136.0580. IR (neat, cm<sup>-1</sup>): ν 3282, 2940, 1642, 1594, 1489, 1300, 746, 696.

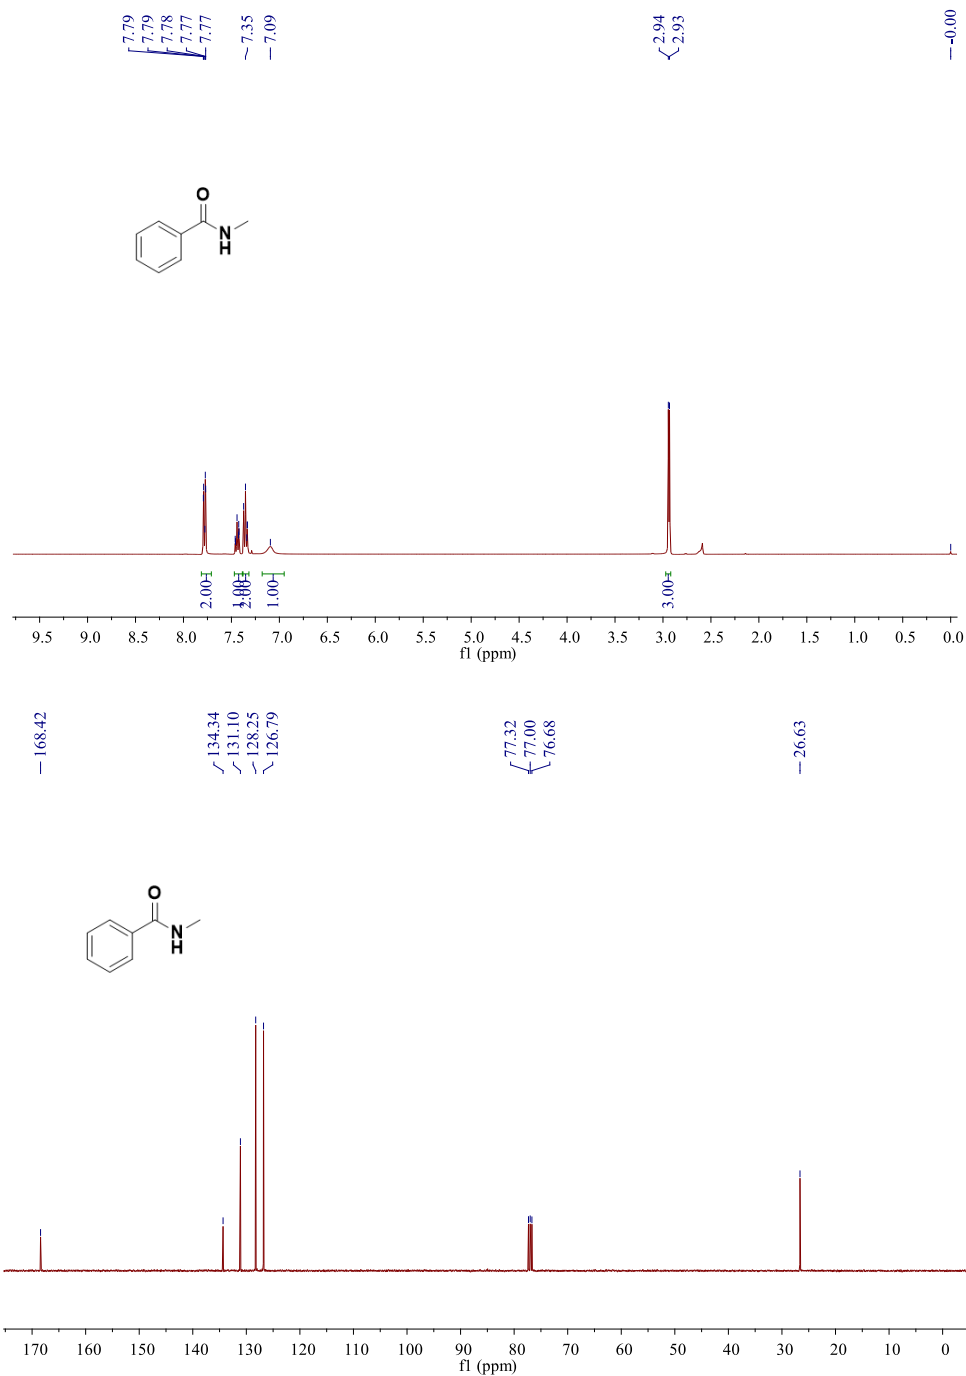

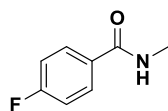

### 4-Fluoro-N-methylbenzamide (3b)

petroleum ether / ethyl acetate = 2:1, white solid, 66% yield (20.2 mg). mp: 128 – 130°C.  $^1\text{H NMR}$  (400 MHz, DMSO-*d*<sub>6</sub>)  $\delta$  8.44 (s, 1H), 7.91 – 7.87 (m, 2H), 7.30 – 7.25 (m, 2H), 2.78 (d,  $J = 4.6$  Hz, 3H).  $^{13}\text{C NMR}$  (100 MHz, DMSO-*d*<sub>6</sub>)  $\delta$  165.52, 163.72 (d,  $J = 248.0$  Hz), 130.97 (d,  $J = 2.9$  Hz, 1H), 129.61 (d,  $J = 8.9$  Hz, 4H), 115.14 (d,  $J = 21.7$  Hz, 5H), 26.23.  $^{19}\text{F NMR}$  (377 MHz, DMSO-*d*<sub>6</sub>)  $\delta$  -109.88 (s, 1F). **HRMS** (ESI-TOF): Anal Calcd. For. C<sub>8</sub>H<sub>8</sub>FNO+Na<sup>+</sup>: 176.0482, Found: 176.0489. **IR** (neat, cm<sup>-1</sup>):  $\nu$  3346, 1634, 1589, 1436, 1319, 845, 793.

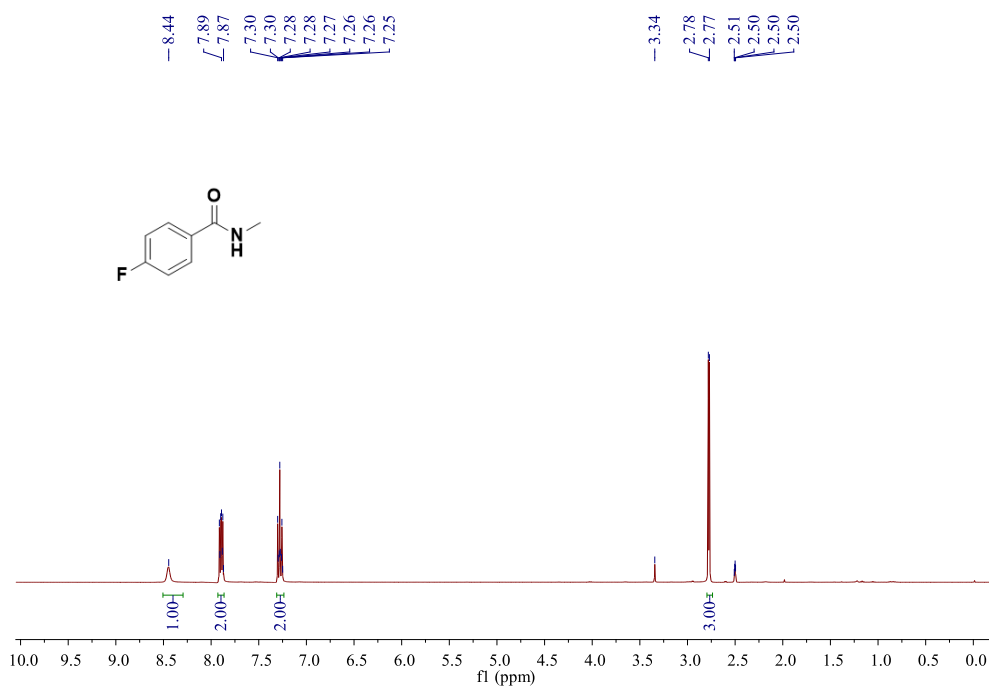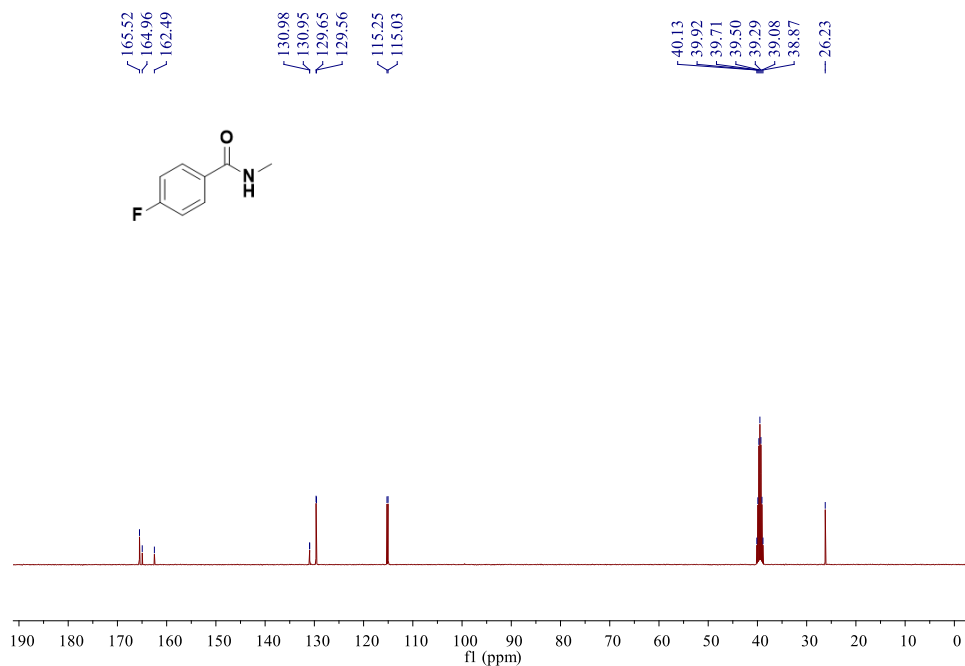

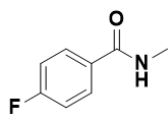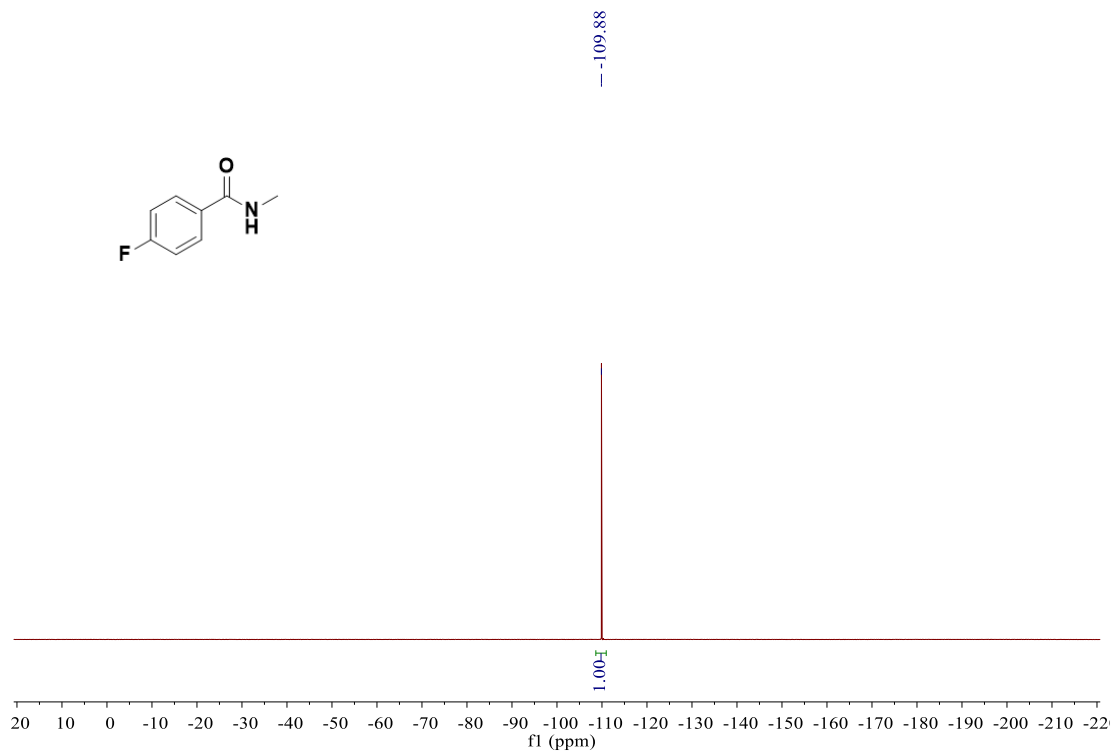

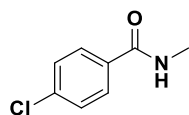

### 4-Chloro-*N*-methylbenzamide (3c)

petroleum ether / ethyl acetate = 2:1, white solid, 86% yield (29.1 mg). mp: 159 – 161°C. <sup>1</sup>H NMR (400 MHz, CDCl<sub>3</sub>) δ 7.72 – 7.69 (m, 2H), 7.49 – 7.36 (m, 2H), 6.38 (s, 1H), 2.99 (d, *J* = 4.8 Hz, 3H). <sup>13</sup>C NMR (100 MHz, DMSO-*d*<sub>6</sub>) δ 165.51, 135.82, 133.22, 128.95, 128.33, 26.24. HRMS (ESI-TOF): Anal Calcd. For. C<sub>8</sub>H<sub>8</sub><sup>35</sup>ClNO+Na<sup>+</sup>: 192.0187, Found: 192.0185; Anal Calcd. For. C<sub>8</sub>H<sub>8</sub><sup>37</sup>ClNO+Na<sup>+</sup>: 194.0157, Found: 194.0194. IR (neat, cm<sup>-1</sup>): ν 3343, 1634, 1601, 1545, 1487, 841, 794.

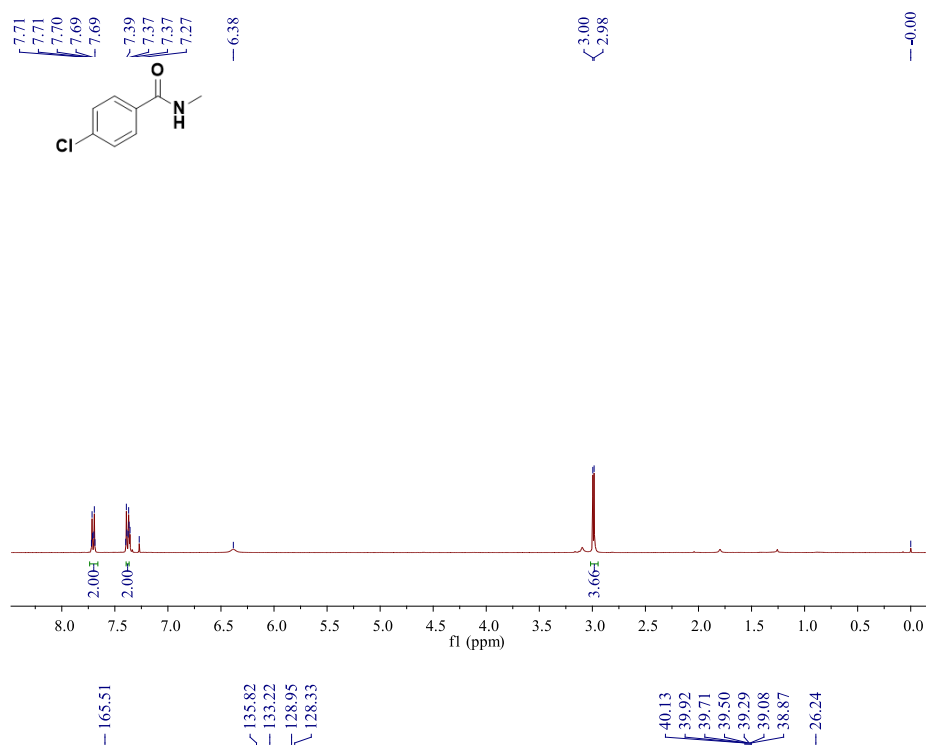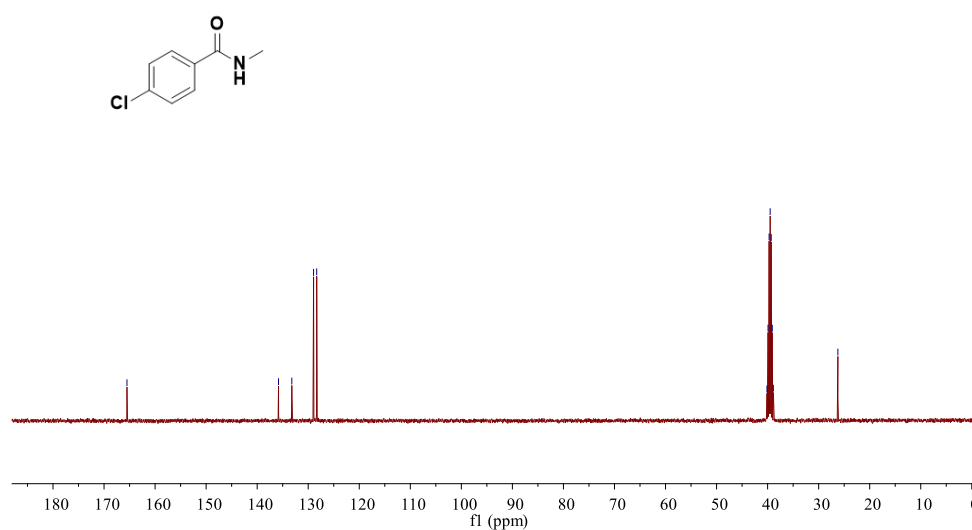

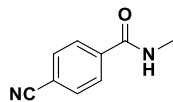

#### 4-Cyano-*N*-methylbenzamide (3d)

petroleum ether / ethyl acetate = 1:1, white solid, 57% yield (18.2 mg). mp: 203 – 205°C. <sup>1</sup>H NMR (300 MHz, DMSO-*d*<sub>6</sub>) δ 8.68 (s, 1H), 7.99 – 7.93 (m, 4H), 2.80 (d, *J* = 4.6 Hz, 3H). <sup>13</sup>C NMR (75 MHz, DMSO-*d*<sub>6</sub>) δ 165.20, 138.44, 132.44, 127.91, 118.35, 113.46, 26.35. HRMS (ESI-TOF): Anal Calcd. For. C<sub>9</sub>H<sub>8</sub>N<sub>2</sub>O+Na<sup>+</sup>: 183.0529, Found: 183.0525. IR (neat, cm<sup>-1</sup>): ν 3336, 2943, 2227, 1722, 1638, 1550, 1498, 1349, 854, 760.

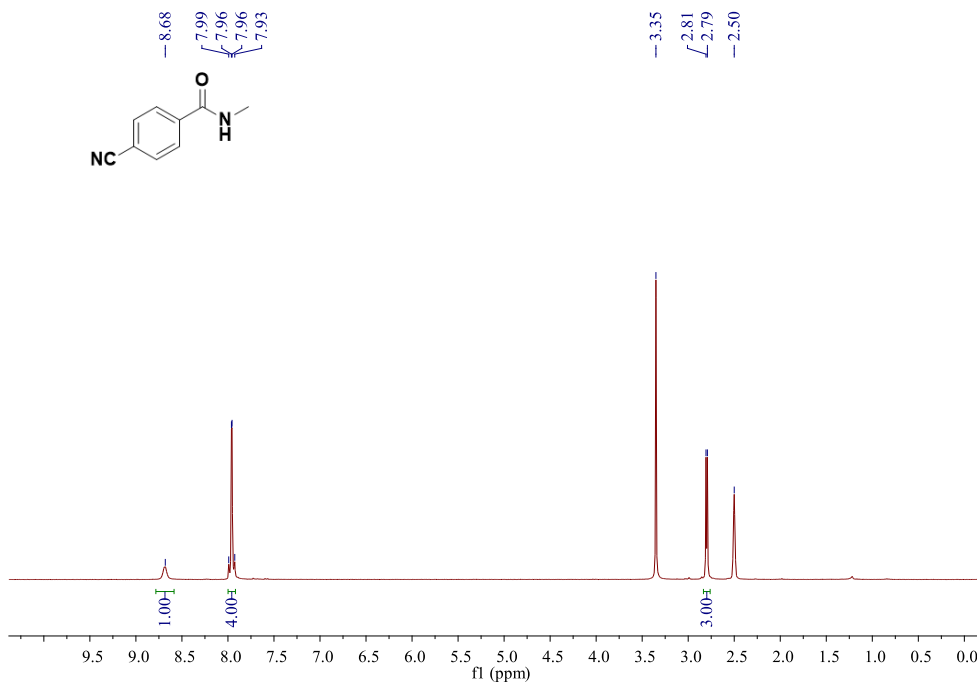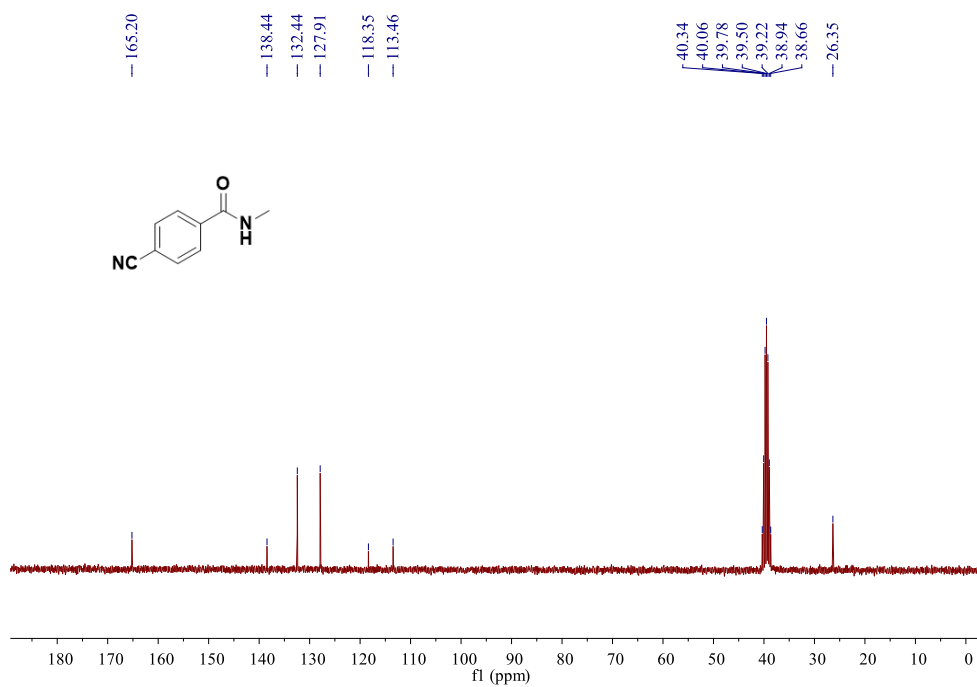

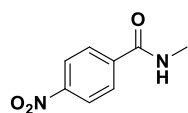

***N*-Methyl-4-nitrobenzamide (3e)**

petroleum ether / ethyl acetate = 1:1, yellow solid, 79% yield (28.4 mg). mp: 218 – 220°C. <sup>1</sup>H NMR (400 MHz, DMSO-*d*<sub>6</sub>) δ 8.76 (s, 1H), 8.30 (d, *J* = 8.8 Hz, 2H), 8.05 (d, *J* = 8.8 Hz, 2H), 2.81 (d, *J* = 4.6 Hz, 3H). <sup>13</sup>C NMR (100 MHz, DMSO-*d*<sub>6</sub>) δ 164.92, 148.90, 140.09, 128.54, 123.51, 26.38. HRMS (ESI-TOF): Anal Calcd. For. C<sub>8</sub>H<sub>8</sub>N<sub>2</sub>O<sub>3</sub>+Na<sup>+</sup>: 203.0427, Found: 203.0425. IR (neat, cm<sup>-1</sup>): ν 3330, 2946, 1645, 1597, 1489, 1347, 824, 780.

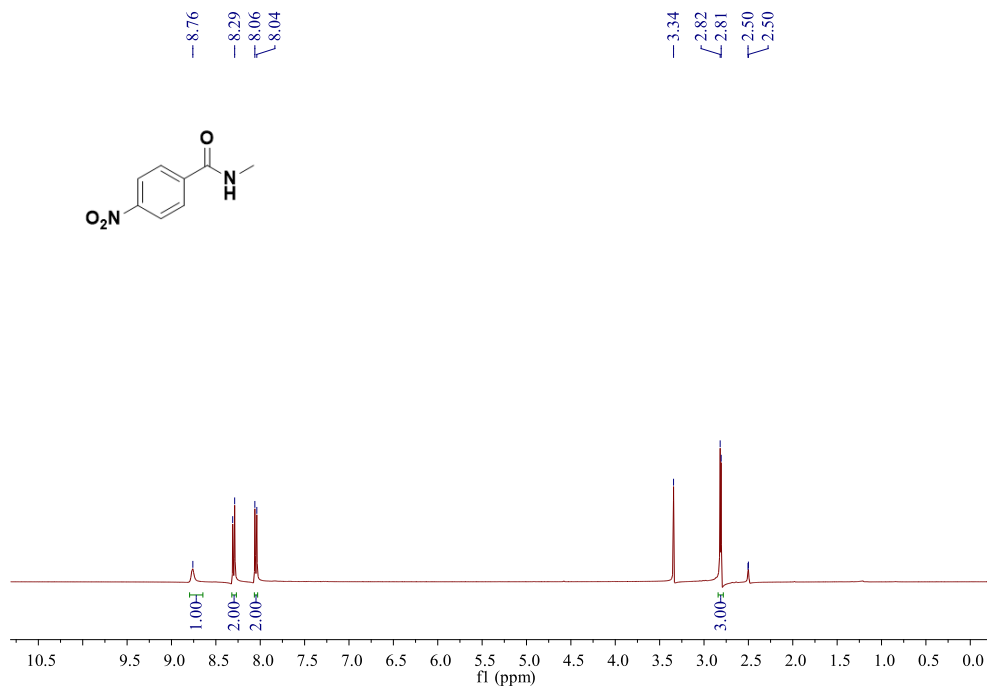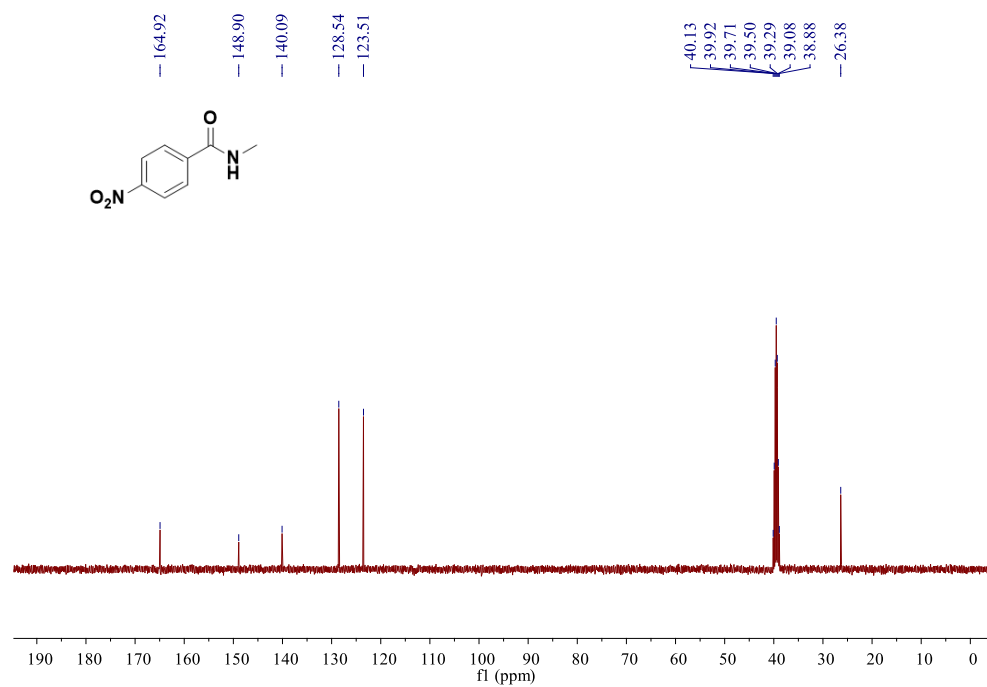

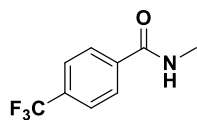

***N*-Methyl-4-(trifluoromethyl)benzamide (3f)**

petroleum ether / ethyl acetate = 2:1, white solid, 73% yield (29.7 mg). mp: 157-159°C. <sup>1</sup>H NMR (400 MHz, DMSO-*d*<sub>6</sub>) δ 8.68 (s, 1H), 8.02 (d, *J* = 8.2 Hz, 2H), 7.82 (d, *J* = 8.2 Hz, 2H), 2.81 (d, *J* = 4.6 Hz, 3H). <sup>13</sup>C NMR (100 MHz, DMSO-*d*<sub>6</sub>) δ 165.87, 138.71, 131.45 (q, *J* = 31.7 Hz), 128.41, 125.76 (q, *J* = 3.8 Hz), 123.07, 26.76. <sup>19</sup>F NMR (377 MHz, DMSO-*d*<sub>6</sub>) δ -61.38 (s, 3F). HRMS (ESI-TOF): Anal Calcd. For. C<sub>9</sub>H<sub>8</sub>F<sub>3</sub>NO +H<sup>+</sup>: 204.0631, Found: 204.0627. IR (neat, cm<sup>-1</sup>): ν 3334, 3082, 1635, 1556, 1495, 1360, 846, 776.

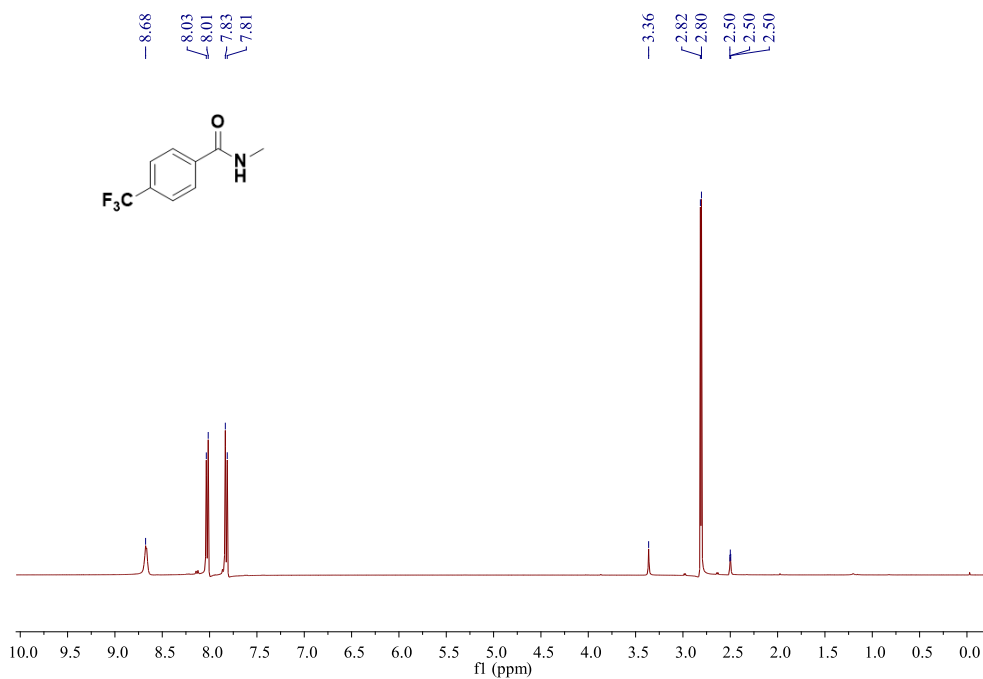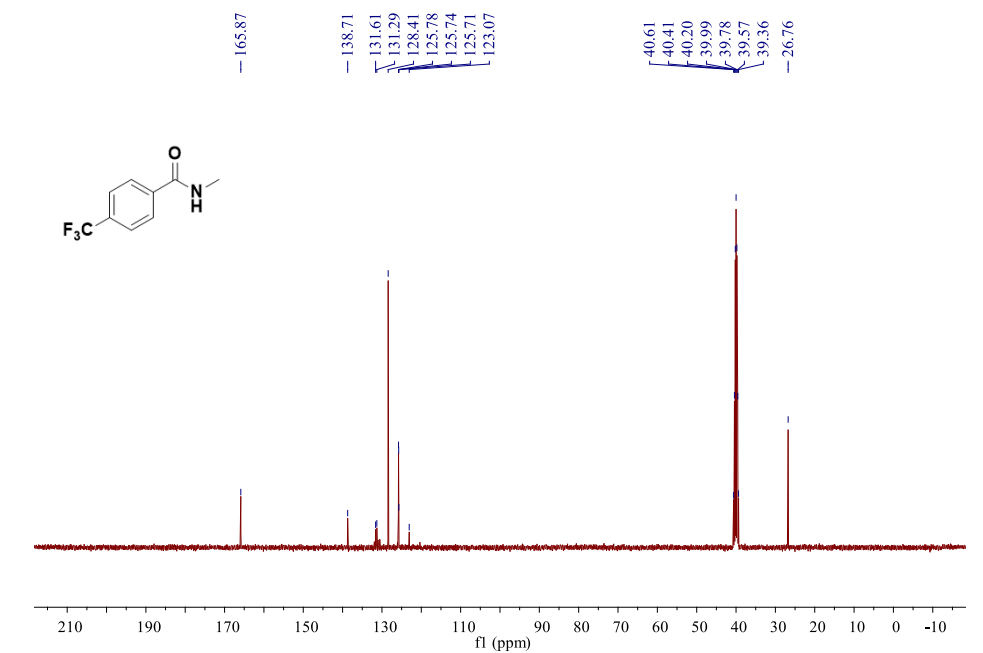

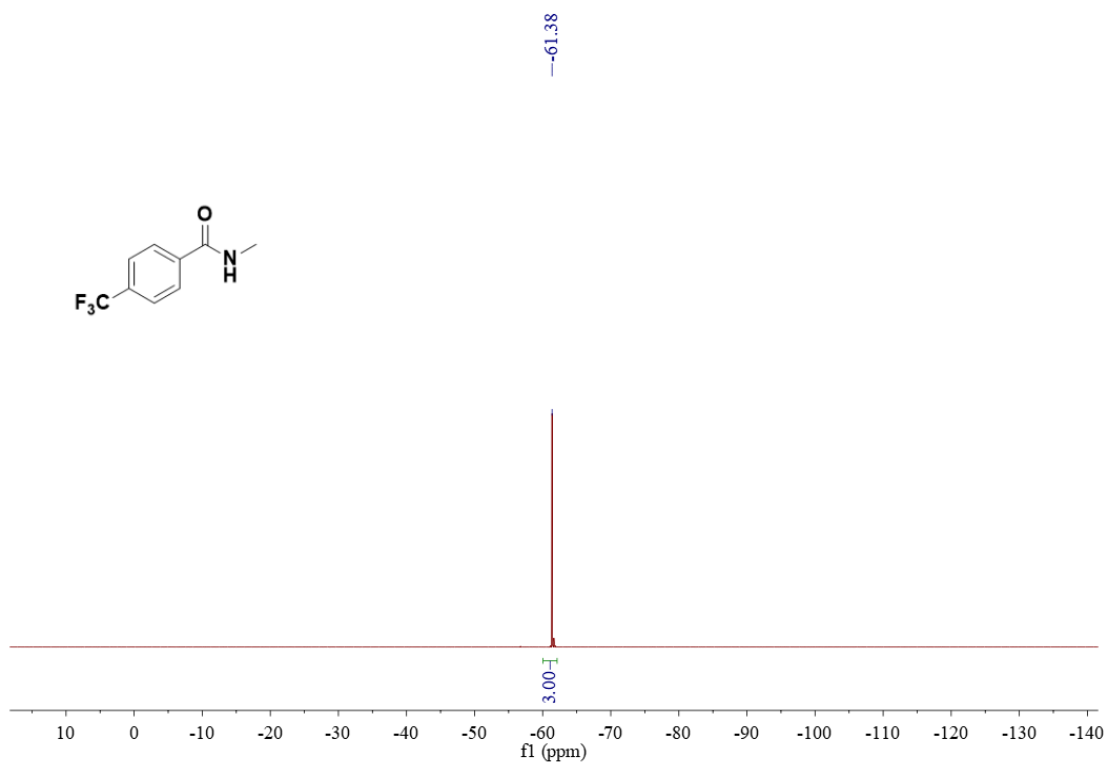



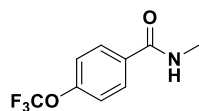

***N*-Methyl-4-(trifluoromethoxy)benzamide (3g)**

petroleum ether / ethyl acetate = 2:1, white solid, 66% yield (28.9 mg). mp: 99 – 101°C. <sup>1</sup>H NMR (400 MHz, DMSO-*d*6) δ 8.55 (d, *J* = 4.1 Hz, 1H), 7.97 – 7.94 (m, 2H), 7.44 – 7.42 (m, 2H), 2.79 (d, *J* = 4.6 Hz, 3H). <sup>13</sup>C NMR (100 MHz, DMSO-*d*6) δ 165.83, 150.59, 134.04, 129.78, 120.98, 120.42 (q, *J* = 255 Hz), 26.68. <sup>19</sup>F NMR (377 MHz, DMSO-*d*6) δ -56.73 (s, 3F). HRMS (ESI-TOF): Anal Calcd. For. C<sub>9</sub>H<sub>8</sub>F<sub>3</sub>NO<sub>2</sub> +Na<sup>+</sup>: 242.0399, Found: 242.0385. IR (neat, cm<sup>-1</sup>): ν 3326, 3050, 1636, 1586, 1410, 1352, 1207, 840, 762.

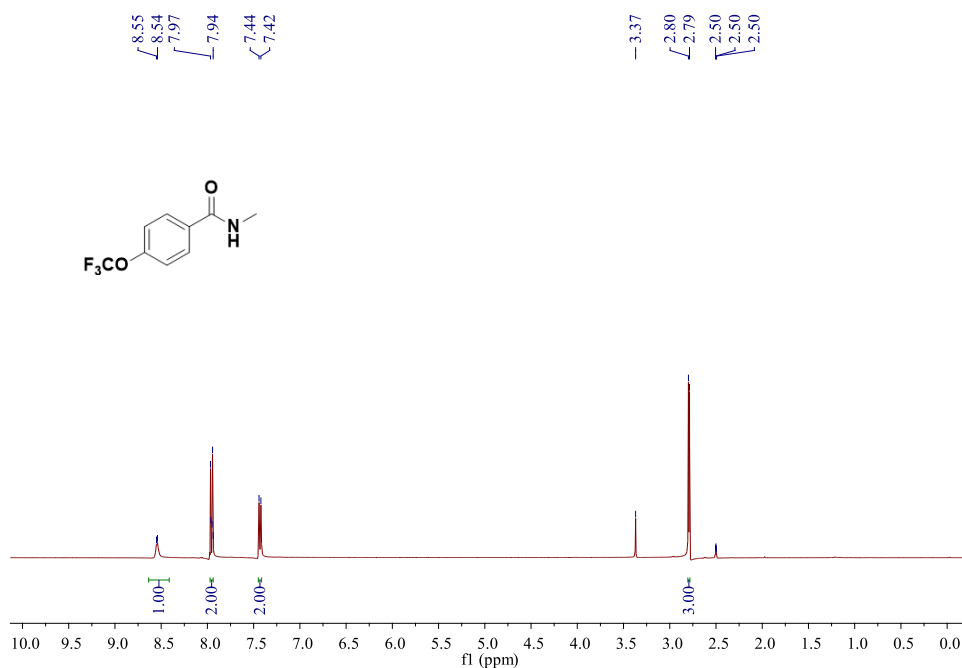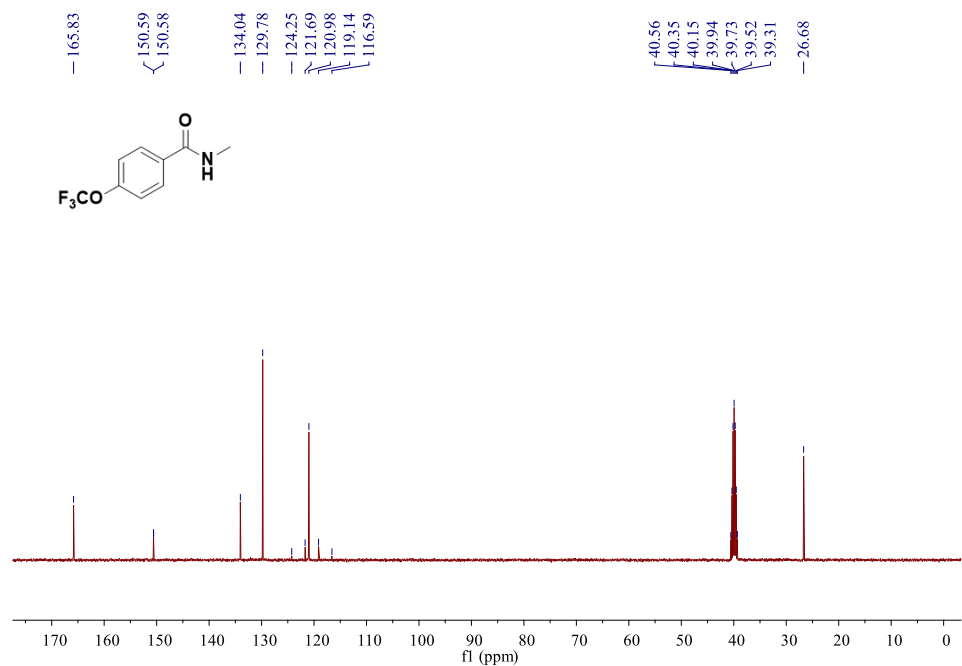

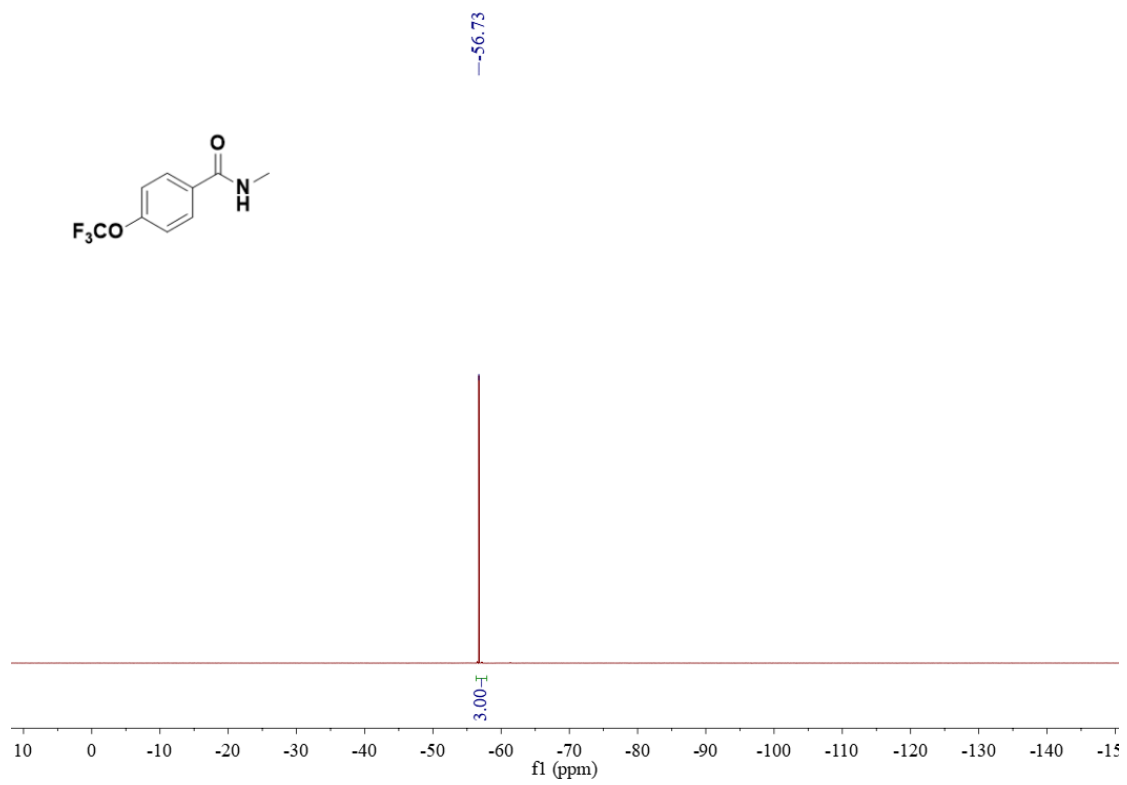

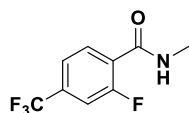

### 2-Fluoro-N-Methyl-4-(trifluoromethyl)benzamide (3h)

petroleum ether / ethyl acetate = 2:1, white solid, 50% yield (22.1 mg). mp: 90 – 91°C.  $^1\text{H NMR}$  (400 MHz,  $\text{DMSO-}d_6$ )  $\delta$  8.48 (s, 1H), 7.83 – 7.77 (m, 2H), 7.66 – 7.64 (m, 1H), 2.80 (d,  $J = 4.6$  Hz, 3H).  $^{13}\text{C NMR}$  (100 MHz,  $\text{DMSO-}d_6$ )  $\delta$  162.99, 158.74 (d,  $J = 251.2$  Hz), 132.07 (dd,  $J = 41.5, 9.0$  Hz), 131.28 (d,  $J = 3.6$  Hz), 128.26 (d,  $J = 15.4$  Hz), 123.04 (dd,  $J = 272.8, 3.0$  Hz), 113.77 (dd,  $J = 26.3, 3.8$  Hz), 26.20.  $^{19}\text{F NMR}$  (377 MHz,  $\text{DMSO-}d_6$ )  $\delta$  -61.53 (s, 3F), -112.21 (s, 1F). **HRMS** (ESI-TOF): Anal Calcd. For.  $\text{C}_9\text{H}_7\text{F}_4\text{NO} + \text{Na}^+$ : 244.0356, Found: 244.0363. **IR** (neat,  $\text{cm}^{-1}$ ):  $\nu$  3262, 2932, 1635, 1523, 1412, 1331, 879, 778.

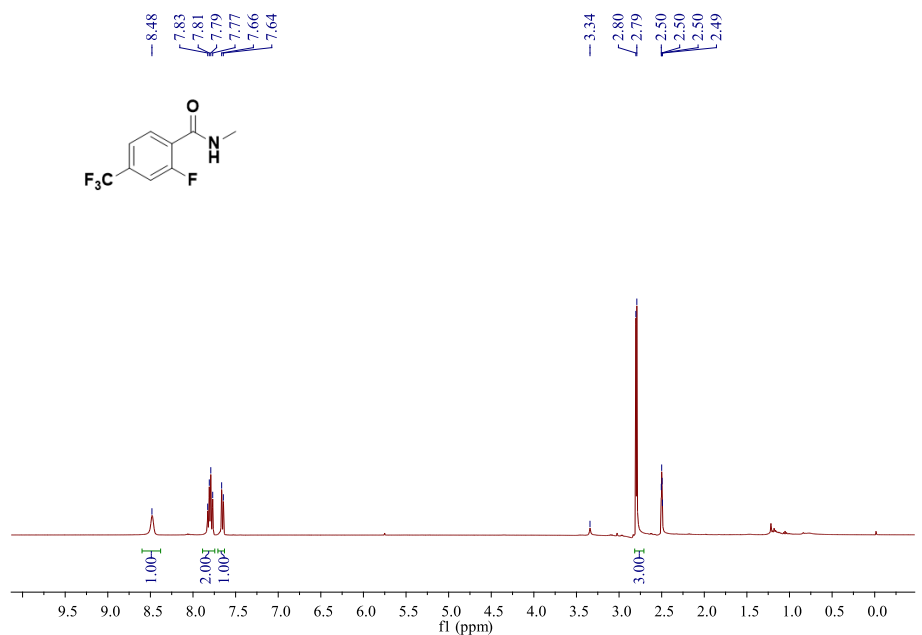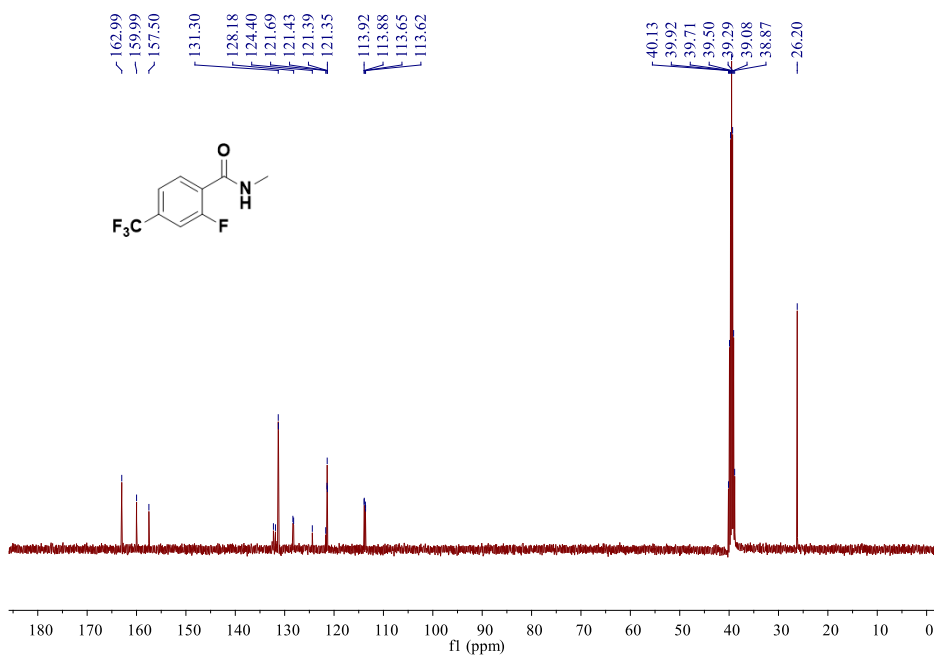

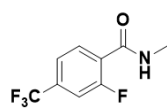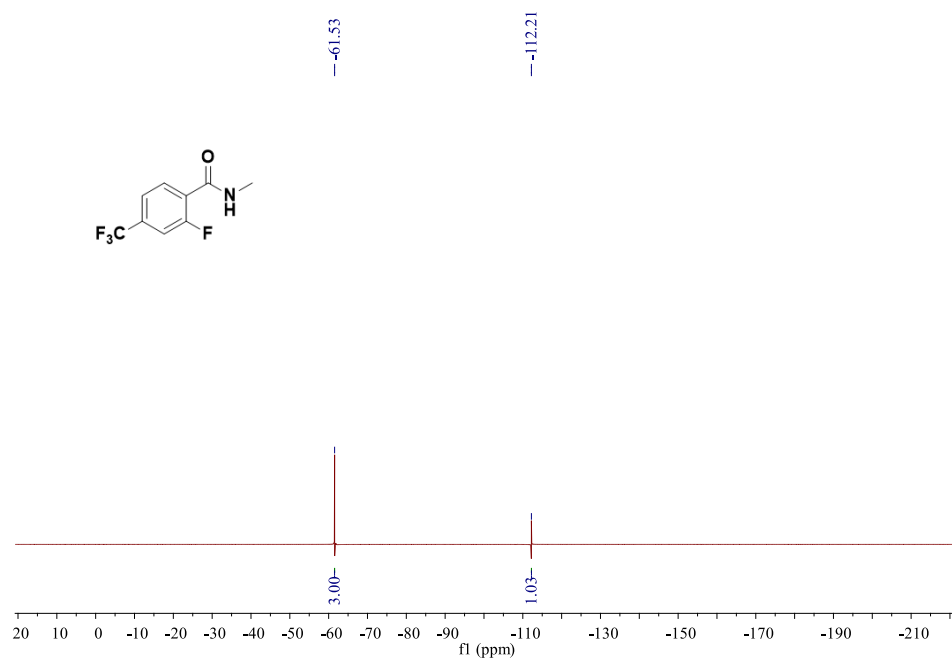

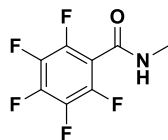

**2,3,4,5,6-pentafluoro-N-methylbenzamide (3i)**

petroleum ether / ethyl acetate = 2:1, white solid, 44% yield (19.8 mg). mp: 98 – 100°C. **<sup>1</sup>H NMR** (400 MHz, DMSO-*d*<sub>6</sub>) δ 8.85 (s, 1H), 2.81 (d, *J* = 4.7 Hz, 3H). **<sup>13</sup>C NMR** (100 MHz, DMSO-*d*<sub>6</sub>) δ 156.96, 143.08 (m), 141.11 (m), 136.97 (m), 112.67 (m), 26.09. **<sup>19</sup>F NMR** (377 MHz, DMSO-*d*<sub>6</sub>) δ -141.30 – -143.38 (m, 2F), -153.54 (q, *J* = 21.8 Hz, 1F), -160.60 – -162.78 (m, 2F). **HRMS** (ESI-TOF): Anal Calcd. For. C<sub>8</sub>H<sub>4</sub>F<sub>5</sub>NO+Na<sup>+</sup>: 248.0105, Found: 248.0106. **IR** (neat, cm<sup>-1</sup>): ν 3269, 1687, 1651, 1570, 1496, 1322, 1032, 988.

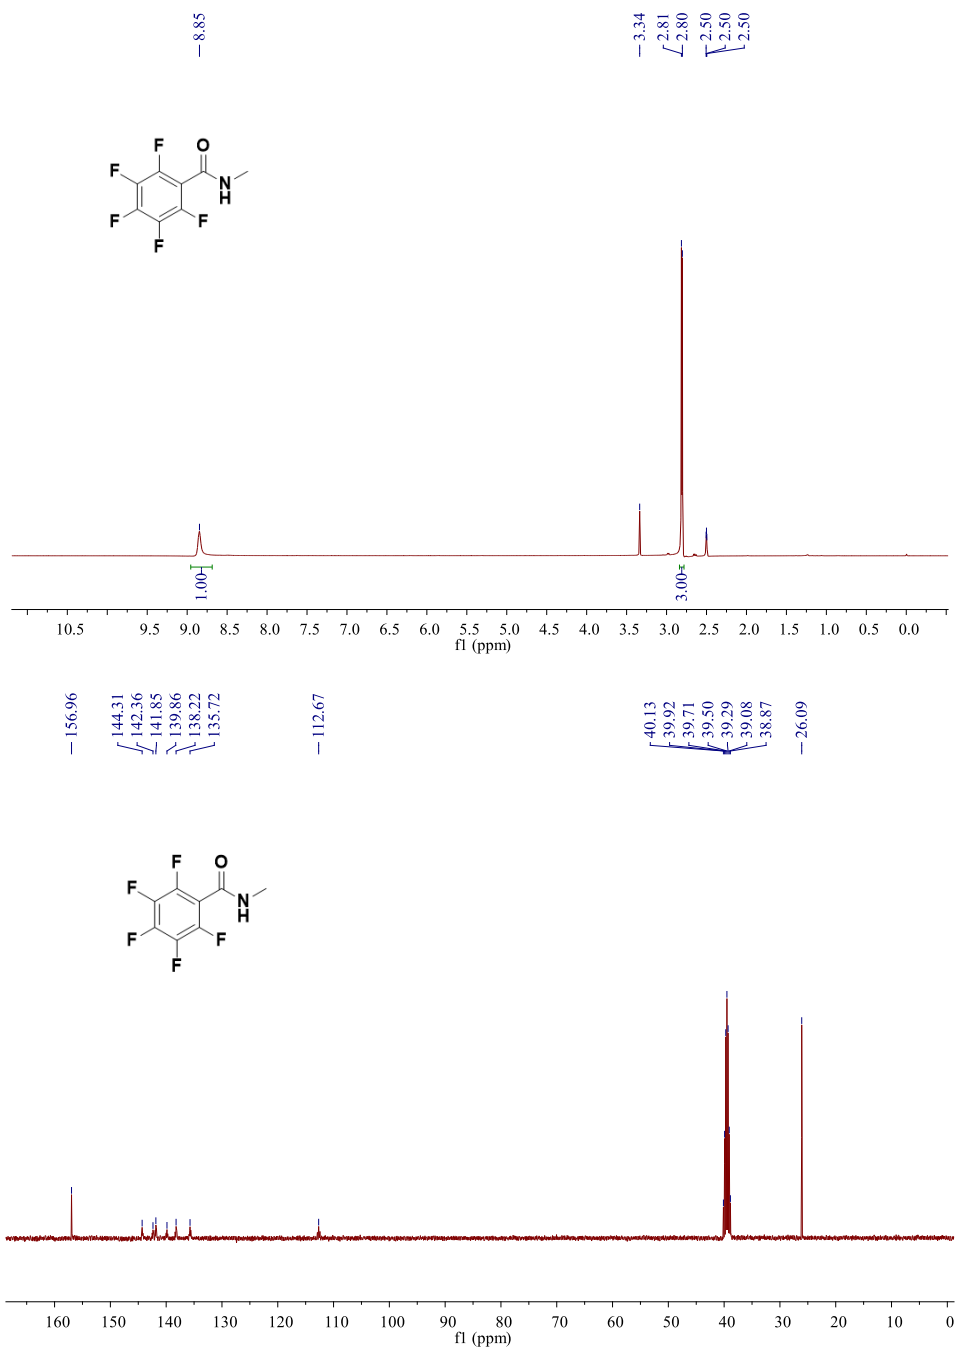

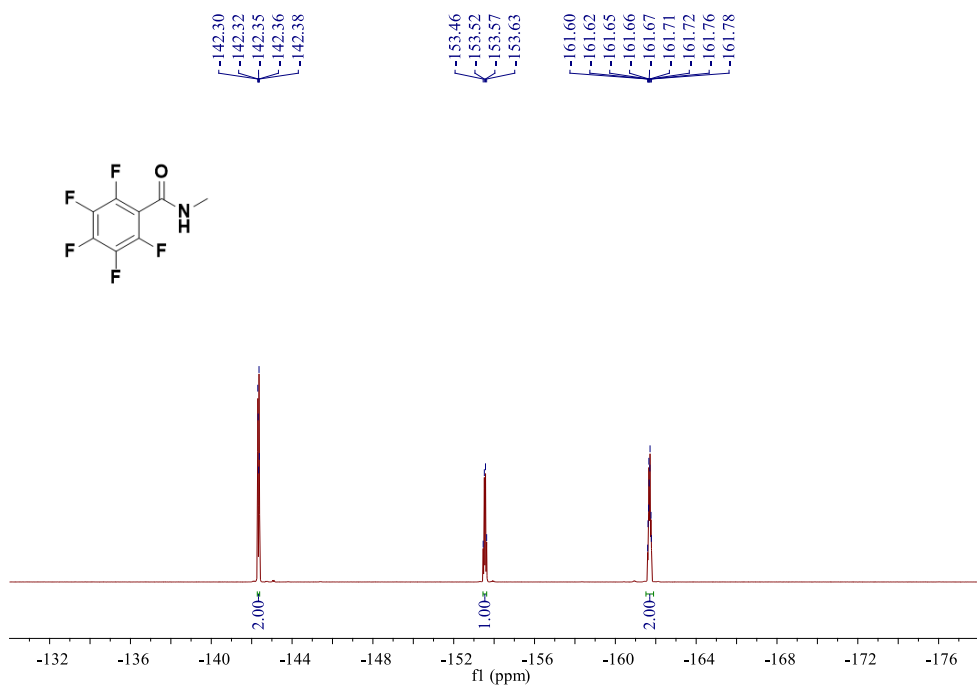

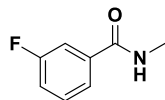

### 3-Fluoro-N-methylbenzamide (3j)

petroleum ether / ethyl acetate = 2:1, yellow solid, 74% yield (22.6 mg). mp: 87 – 88°C.  $^1\text{H NMR}$  (400 MHz,  $\text{DMSO-}d_6$ )  $\delta$  8.53 (d,  $J = 2.6$  Hz, 1H), 7.70 – 7.68 (m, 1H), 7.64 – 7.61 (m, 1H), 7.52 – 7.47 (m, 1H), 7.36 – 7.31 (m, 1H), 2.79 (d,  $J = 4.6$  Hz, 3H).  $^{13}\text{C NMR}$  (100 MHz,  $\text{DMSO-}d_6$ )  $\delta$  165.31 (d,  $J = 2.5$  Hz), 162.01 (d,  $J = 244.1$  Hz), 136.93 (d,  $J = 6.8$  Hz), 130.38 (d,  $J = 8.0$  Hz), 123.18 (d,  $J = 2.8$  Hz), 117.86 (d,  $J = 21.1$  Hz), 113.90 (d,  $J = 22.7$  Hz), 26.25.  $^{19}\text{F NMR}$  (377 MHz,  $\text{DMSO-}d_6$ )  $\delta$  -112.90 (s, 1F). **HRMS** (ESI-TOF): Anal Calcd. For.  $\text{C}_8\text{H}_8\text{FNO} + \text{Na}^+$ : 176.0482, Found: 176.0478. **IR** (neat,  $\text{cm}^{-1}$ ):  $\nu$  3335, 2947, 1634, 1552, 1488, 1301, 892, 802, 792.

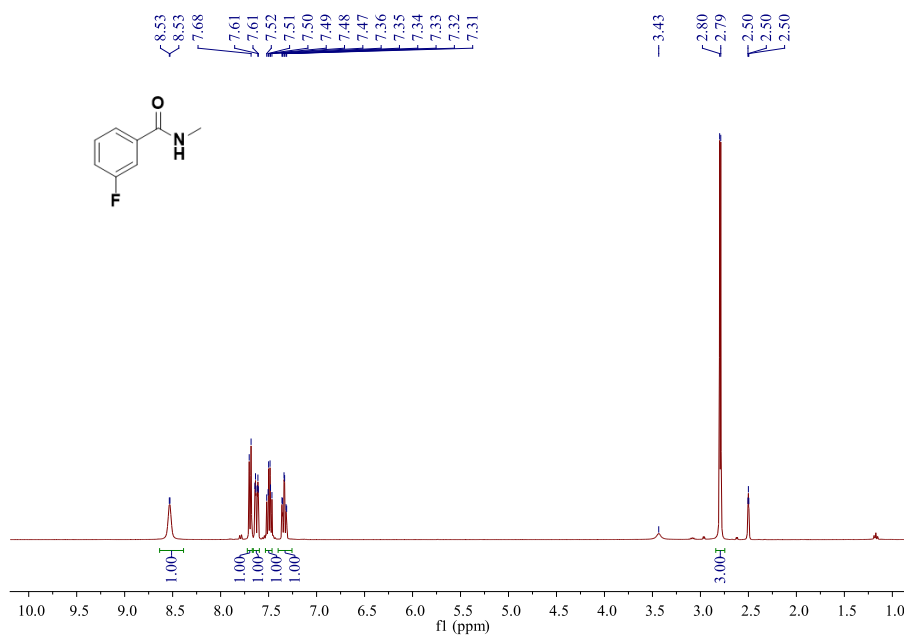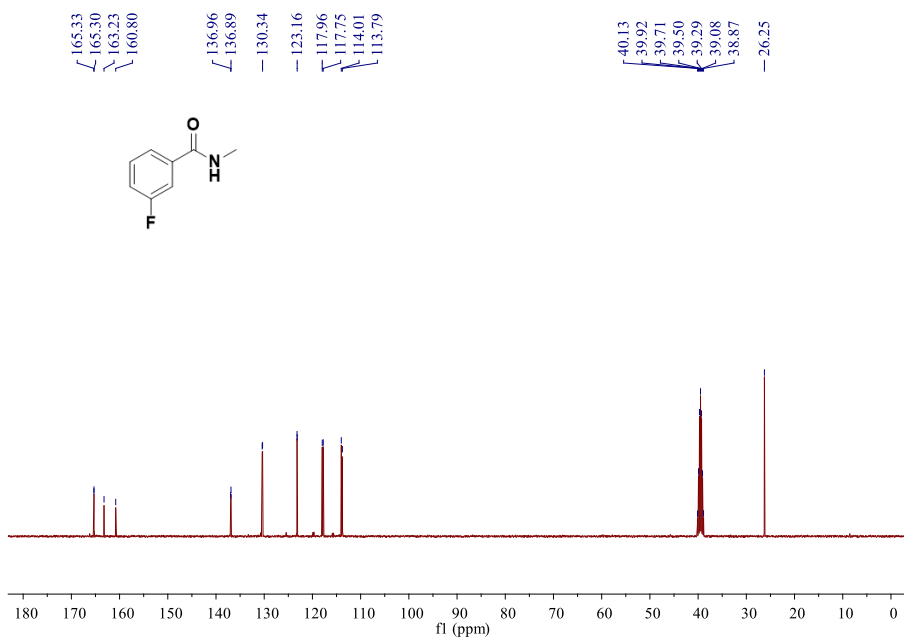

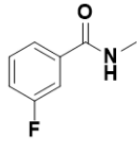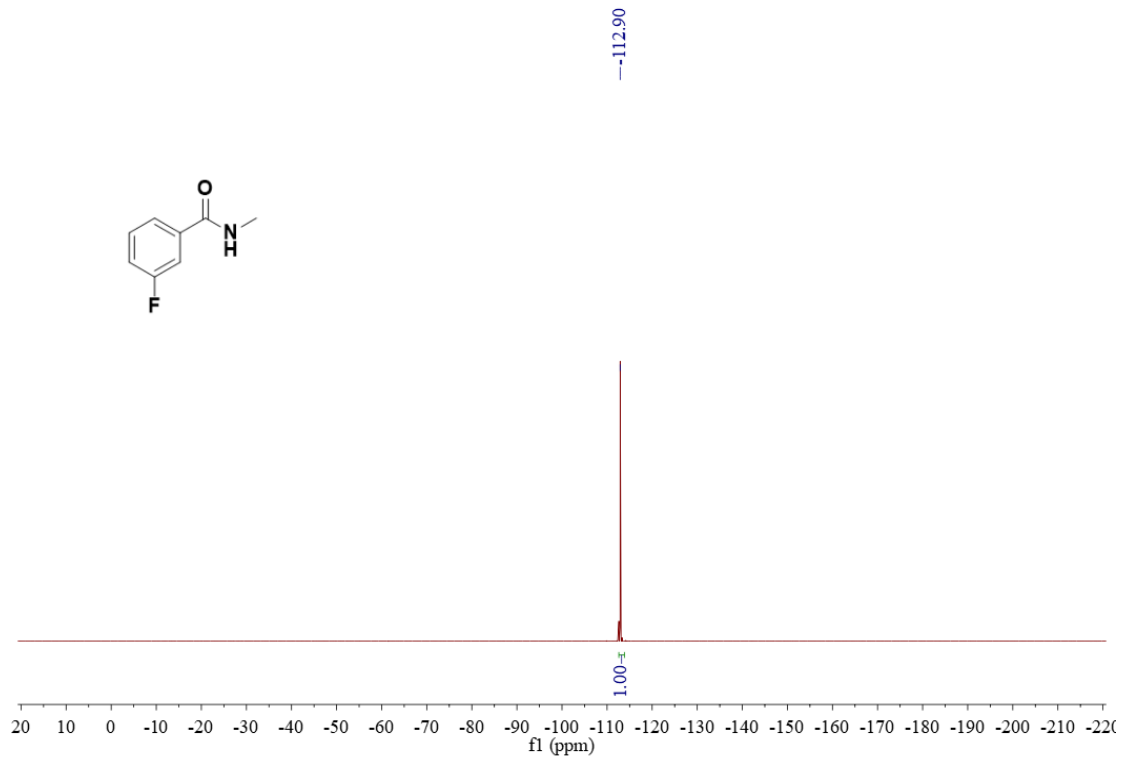



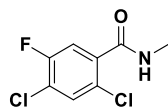

### 2,4,6-trichloro-*N*-methylbenzamide (3k)

petroleum ether / ethyl acetate = 2:1, white solid, 61% yield (27.0 mg). mp: 130 – 132°C.  $^1\text{H NMR}$  (300 MHz, DMSO-*d*<sub>6</sub>)  $\delta$  8.47 (d,  $J = 4.2$  Hz, 1H), 7.88 (d,  $J = 6.6$  Hz, 1H), 7.59 (d,  $J = 9.1$  Hz, 1H), 2.75 (d,  $J = 4.7$  Hz, 3H).  $^{13}\text{C NMR}$  (75 MHz, DMSO-*d*<sub>6</sub>)  $\delta$  164.70, 155.84 (d,  $J = 248.3$  Hz), 137.37 (d,  $J = 6.3$  Hz), 131.20, 126.09 (d,  $J = 3.7$  Hz), 121.25 (d,  $J = 18.8$  Hz), 117.10 (d,  $J = 23.8$  Hz), 25.97.  $^{19}\text{F NMR}$  (377 MHz, DMSO-*d*<sub>6</sub>)  $\delta$  -117.73 (s, 1F). **HRMS** (ESI-TOF): Anal Calcd. For.  $\text{C}_8\text{H}_6^{35}\text{Cl}_2\text{FNO} + \text{Na}^+$ : 243.9703, Found: 243.9700. Anal Calcd. For.  $\text{C}_8\text{H}_6^{35,37}\text{Cl}_2\text{FNO} + \text{Na}^+$ : 245.9673, Found: 245.9671. **IR** (neat,  $\text{cm}^{-1}$ ):  $\nu$  3295, 2854, 1752, 1645, 1553, 1469, 1309, 950, 886.

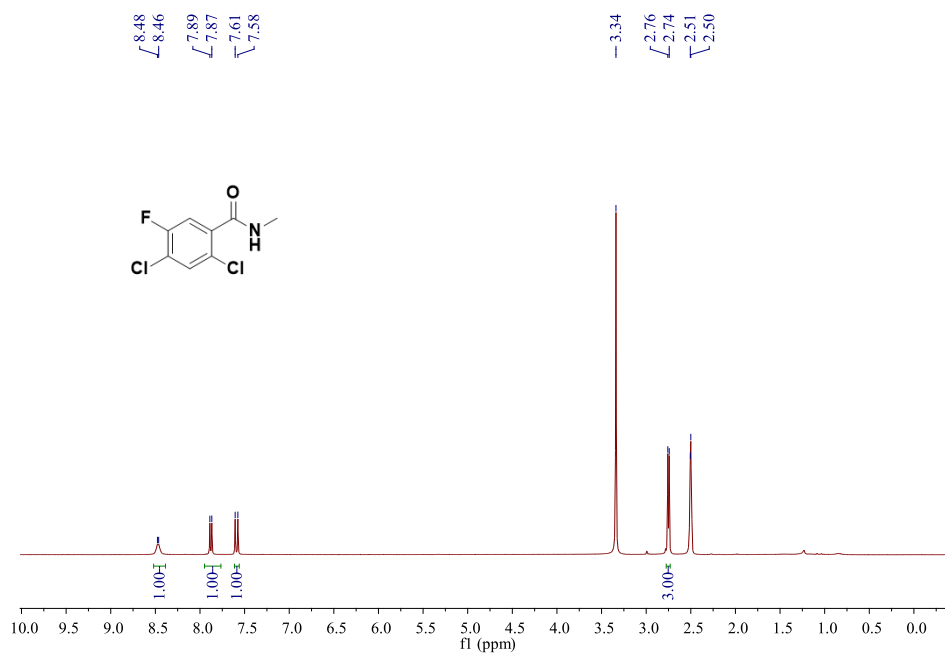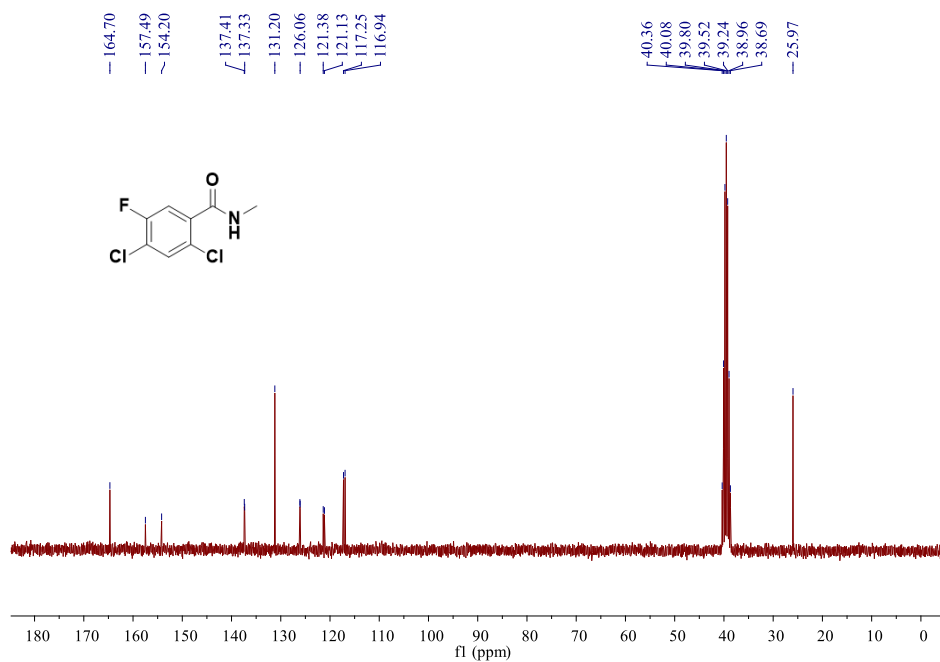

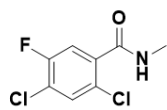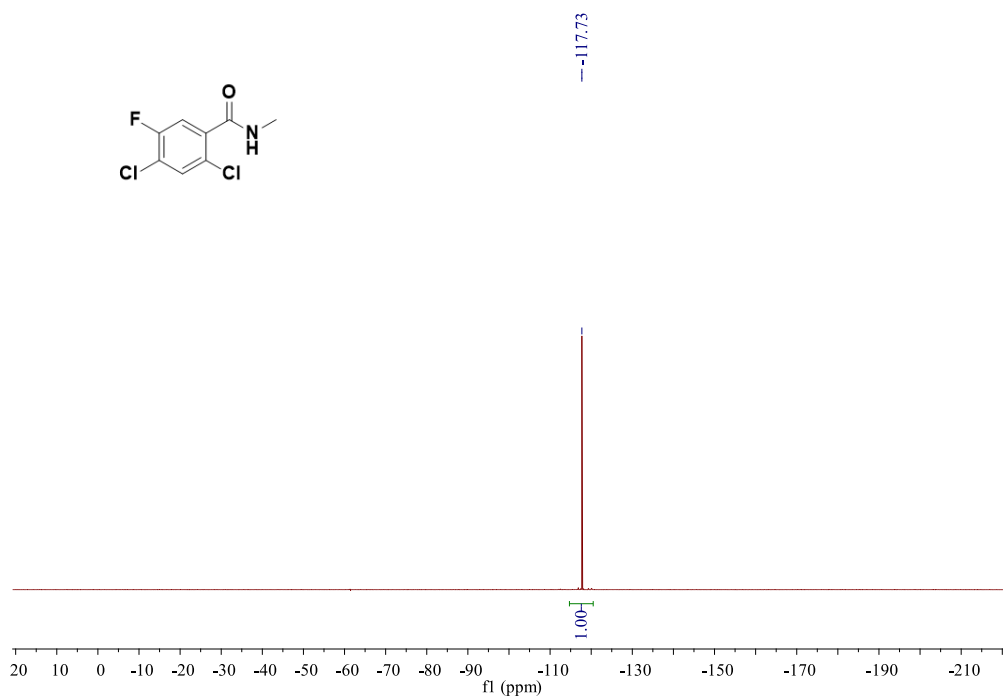

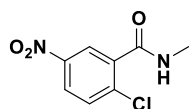

**2-Chloro-N-methyl-5-nitrobenzamide (31)**

petroleum ether / ethyl acetate = 1:1, white solid, 52% yield (22.3 mg). mp: 171 – 172°C. <sup>1</sup>H NMR (400 MHz, DMSO-*d*<sub>6</sub>) δ 8.61 (d, *J* = 3.7 Hz, 1H), 8.29 – 8.25 (m, 2H), 7.83 – 7.80 (m, 1H), 2.79 (d, *J* = 4.7 Hz, 3H). <sup>13</sup>C NMR (100 MHz, DMSO-*d*<sub>6</sub>) δ 164.71, 146.03, 137.86, 137.07, 131.31, 125.38, 123.73, 26.05. HRMS (ESI-TOF): Anal Calcd. For. C<sub>8</sub>H<sub>7</sub><sup>35</sup>ClN<sub>2</sub>O<sub>3</sub> +Na<sup>+</sup>: 237.0037, Found: 237.0038. Anal Calcd. For. C<sub>8</sub>H<sub>7</sub><sup>37</sup>ClN<sub>2</sub>O<sub>3</sub> +Na<sup>+</sup>: 239.0008, Found: 239.0030. IR (neat, cm<sup>-1</sup>): ν 3276, 1656, 1557, 1464, 1352, 910, 844, 787.

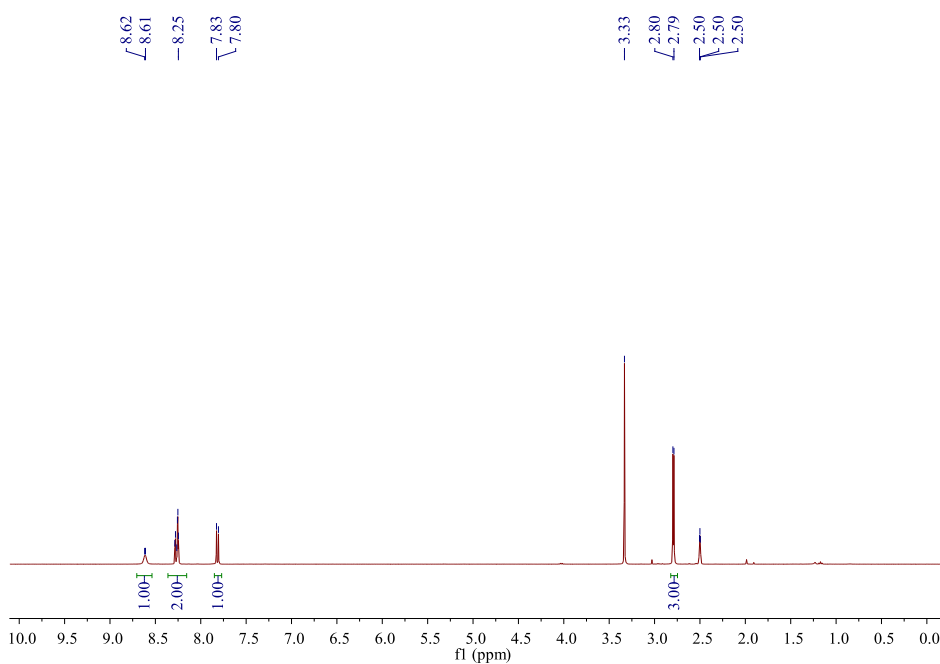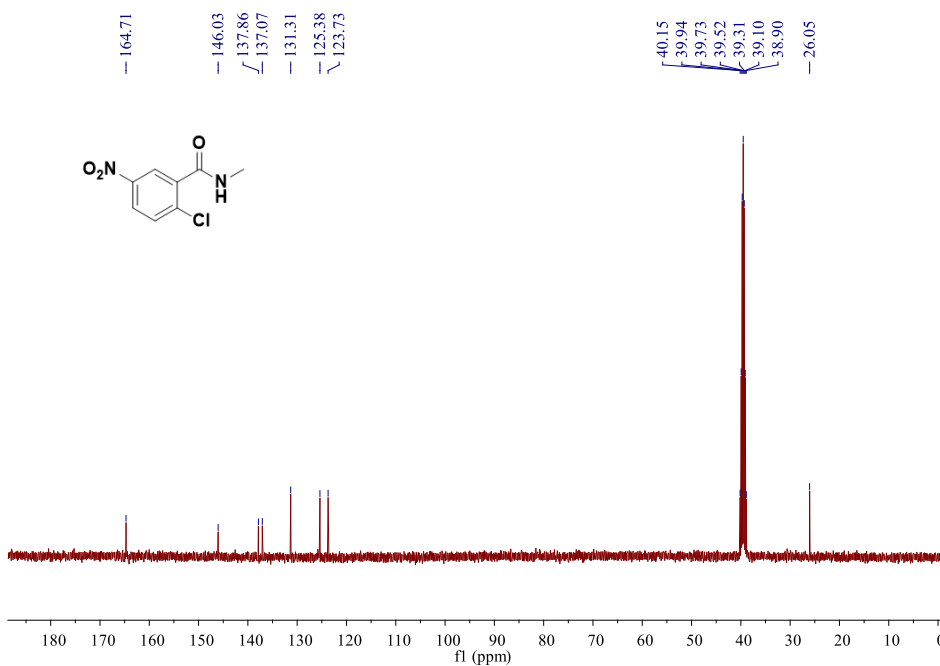

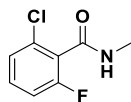

### 2-Chloro-6-fluoro-*N*-methylbenzamide (**3m**)

petroleum ether / ethyl acetate = 2:1, white solid, 48% yield (18.0 mg). mp: 135 – 137°C. <sup>1</sup>H NMR (400 MHz, DMSO-*d*<sub>6</sub>) δ 8.59 (s, 1H), 7.49 – 7.44 (m, 1H), 7.37 – 7.35 (m, 1H), 7.31 – 7.26 (m, 1H), 2.77 (d, *J* = 4.7 Hz, 3H). <sup>13</sup>C NMR (100 MHz, DMSO-*d*<sub>6</sub>) δ 161.96, 158.66 (d, *J* = 247.7 Hz), 131.21 (d, *J* = 9.2 Hz), 131.01 (d, *J* = 6.3 Hz), 126.18 (d, *J* = 23.3 Hz), 125.38 (d, *J* = 3.3 Hz), 114.58 (d, *J* = 21.9 Hz), 25.86. <sup>19</sup>F NMR (377 MHz, DMSO-*d*<sub>6</sub>) δ -114.13 (s, 1F). HRMS (ESI-TOF): Anal Calcd. For. C<sub>8</sub>H<sub>7</sub><sup>35</sup>ClFNO +Na<sup>+</sup>: 210.0092, Found: 210.0096. Anal Calcd. For. C<sub>8</sub>H<sub>7</sub><sup>37</sup>ClFNO +Na<sup>+</sup>: 212.0063, Found: 212.0055. IR (neat, cm<sup>-1</sup>): ν 3279, 2944, 1645, 1547, 1488, 1310, 816, 766.

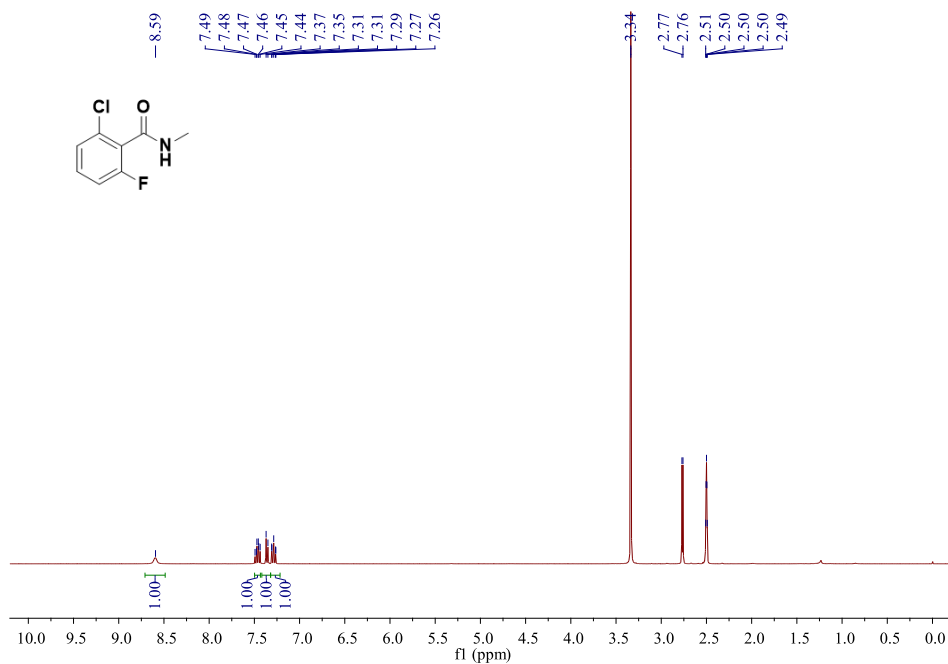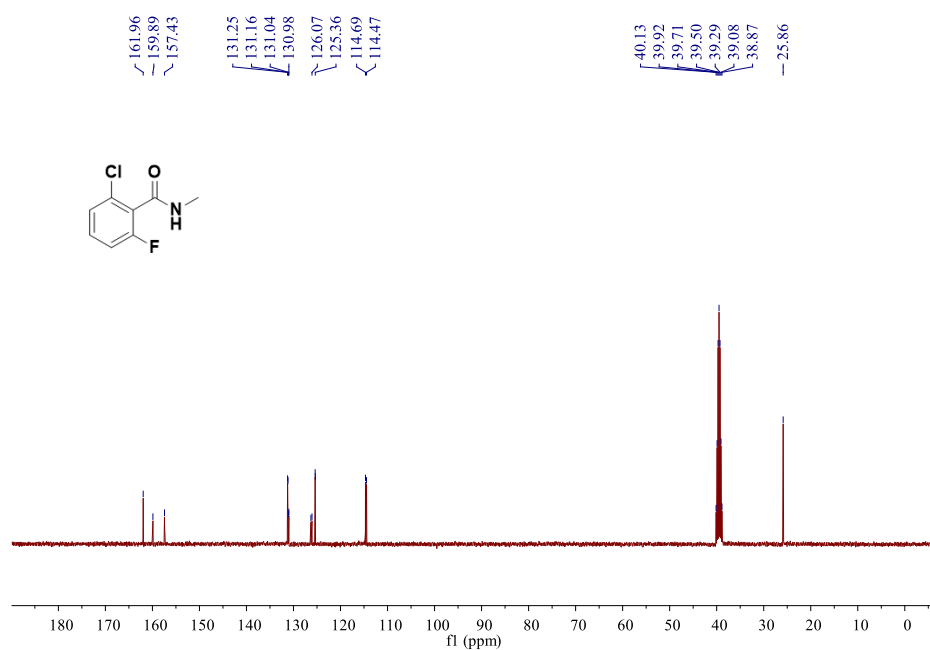

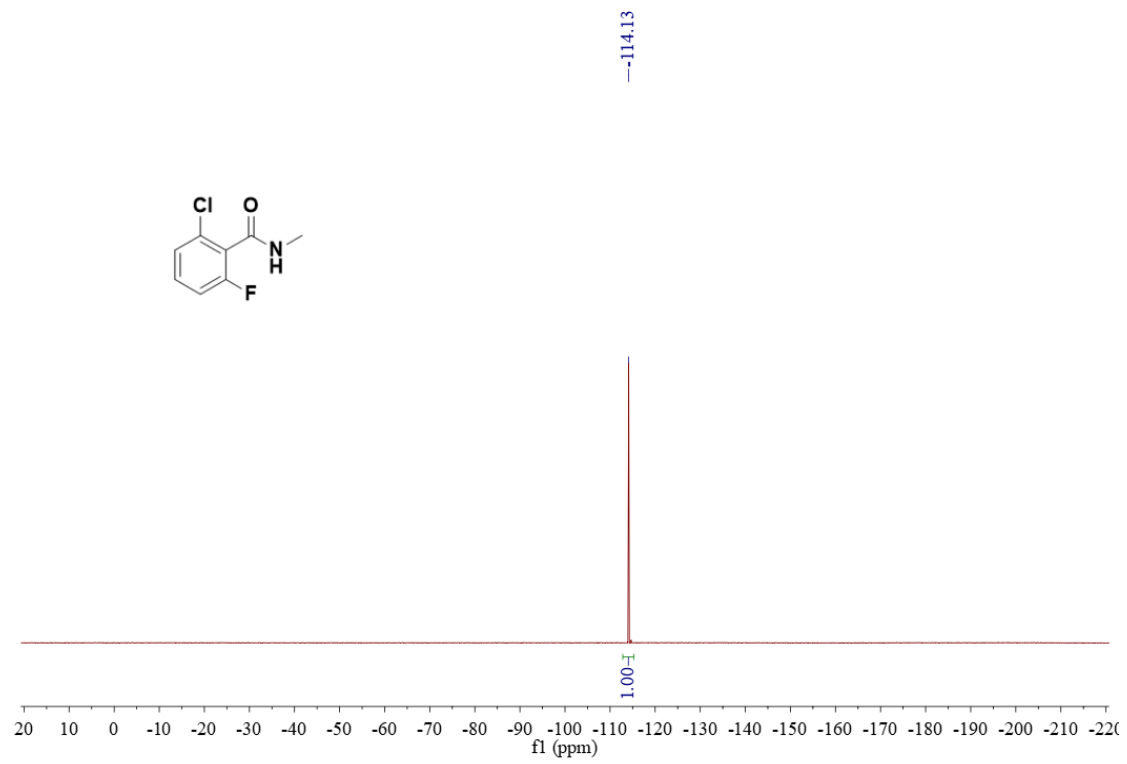

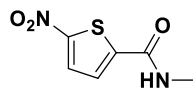

***N*-Methyl-5-nitrothiophene-2-carboxamide (3n)**

petroleum ether / ethyl acetate = 2:1, yellow solid, 41% yield (15.3 mg). mp: 214 – 215°C. <sup>1</sup>H NMR (400 MHz, DMSO-*d*<sub>6</sub>) δ 8.54 (s, 1H), 7.57 (d, *J* = 4.0 Hz, 1H), 7.17 (d, *J* = 4.0 Hz, 1H), 2.75 (d, *J* = 4.6 Hz, 3H). <sup>13</sup>C NMR (100 MHz, DMSO-*d*<sub>6</sub>) δ 160.50, 139.21, 132.54, 128.02, 127.55, 25.94. HRMS (ESI-TOF): Anal Calcd. For. C<sub>6</sub>H<sub>6</sub>N<sub>2</sub>O<sub>3</sub>S + Na<sup>+</sup>: 208.9991, Found: 208.9987. IR (neat, cm<sup>-1</sup>): ν 3335, 3083, 1734, 1632, 1558, 1495, 1304, 831, 744.

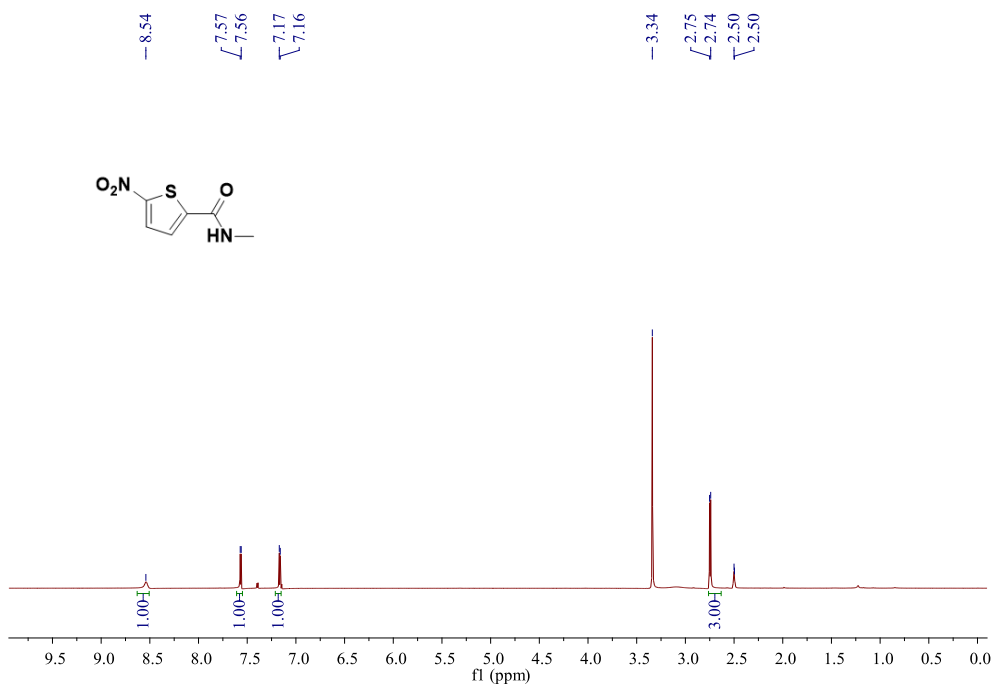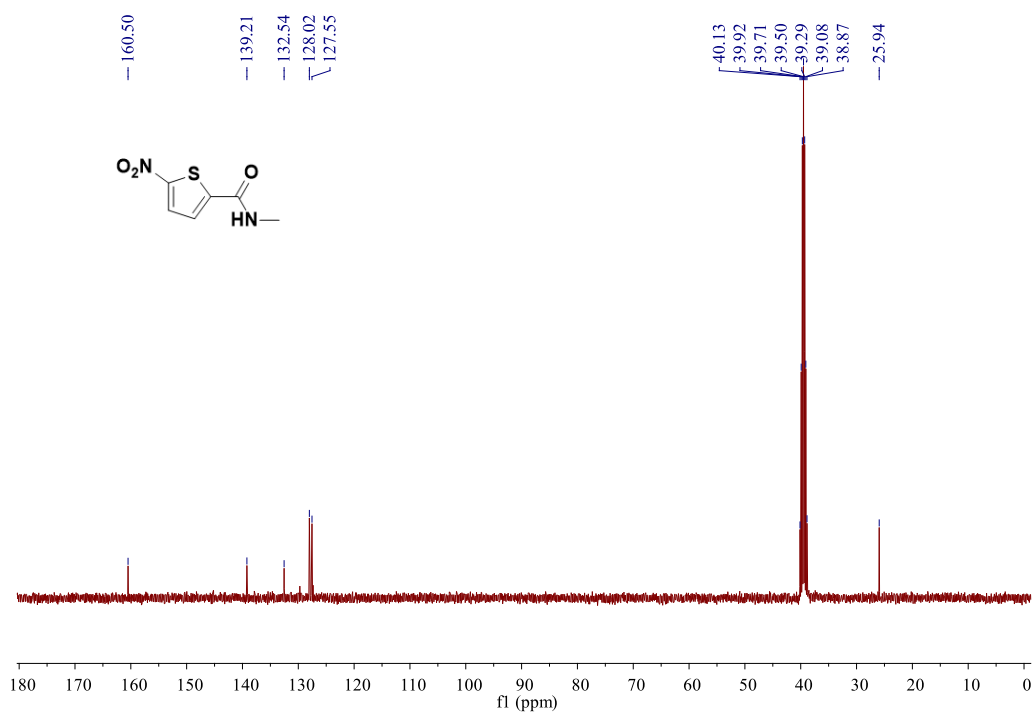

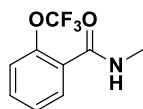

***N*-Methyl-2-(trifluoromethoxy)benzamide (3o)**

petroleum ether / ethyl acetate = 2:1, white solid, 53% yield (23.2 mg). mp: 63 – 65°C. <sup>1</sup>H NMR (400 MHz, DMSO-*d*<sub>6</sub>) δ 8.36 (s, 1H), 7.60 – 7.56 (m, 2H), 7.47 – 7.40 (m, 2H), 2.76 (d, *J* = 4.6 Hz, 1H). <sup>13</sup>C NMR (100 MHz, DMSO-*d*<sub>6</sub>) δ 165.03, 144.86 (q, *J* = 1.7 Hz), 131.35, 131.19, 129.62, 127.51, 121.54, 120.03 (q, *J* = 256.8 Hz), 26.02. <sup>19</sup>F NMR (377 MHz, DMSO-*d*<sub>6</sub>) δ -56.51 (s, 3F). HRMS (ESI-TOF): Anal Calcd. For. C<sub>9</sub>H<sub>8</sub>F<sub>3</sub>NO<sub>2</sub> +Na<sup>+</sup>: 242.0399, Found: 242.0401. IR (neat, cm<sup>-1</sup>): ν 3282, 2950, 1646, 1593, 1444, 1321, 1250, 765, 698.

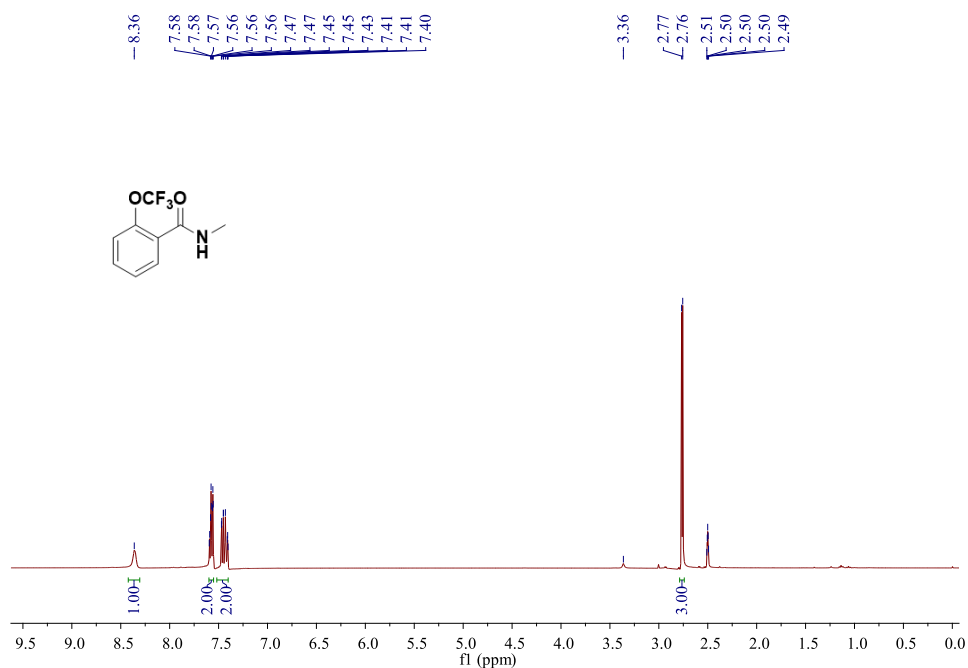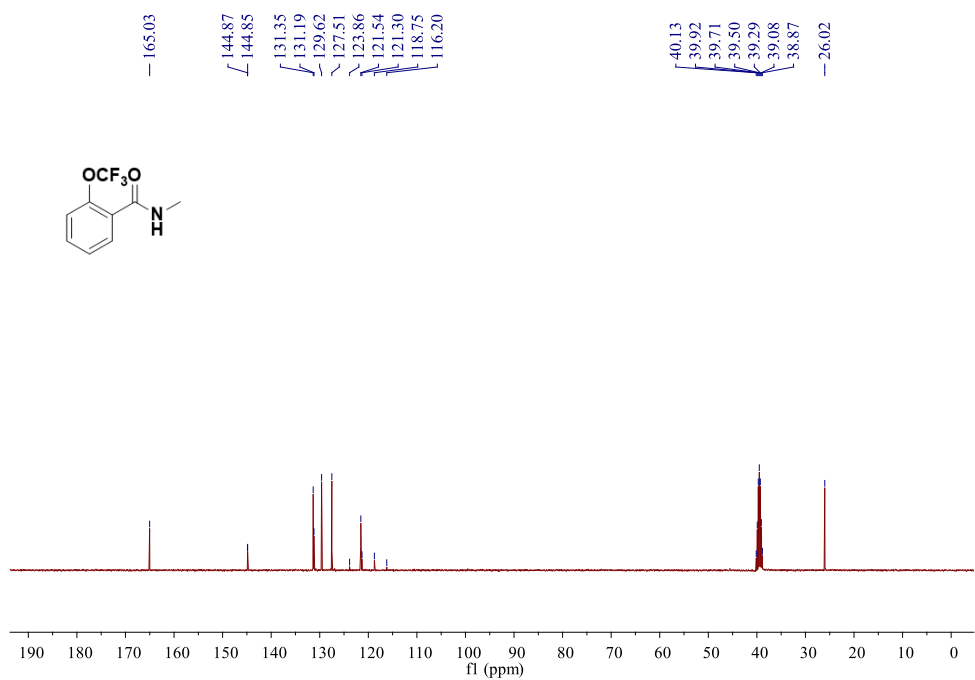

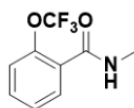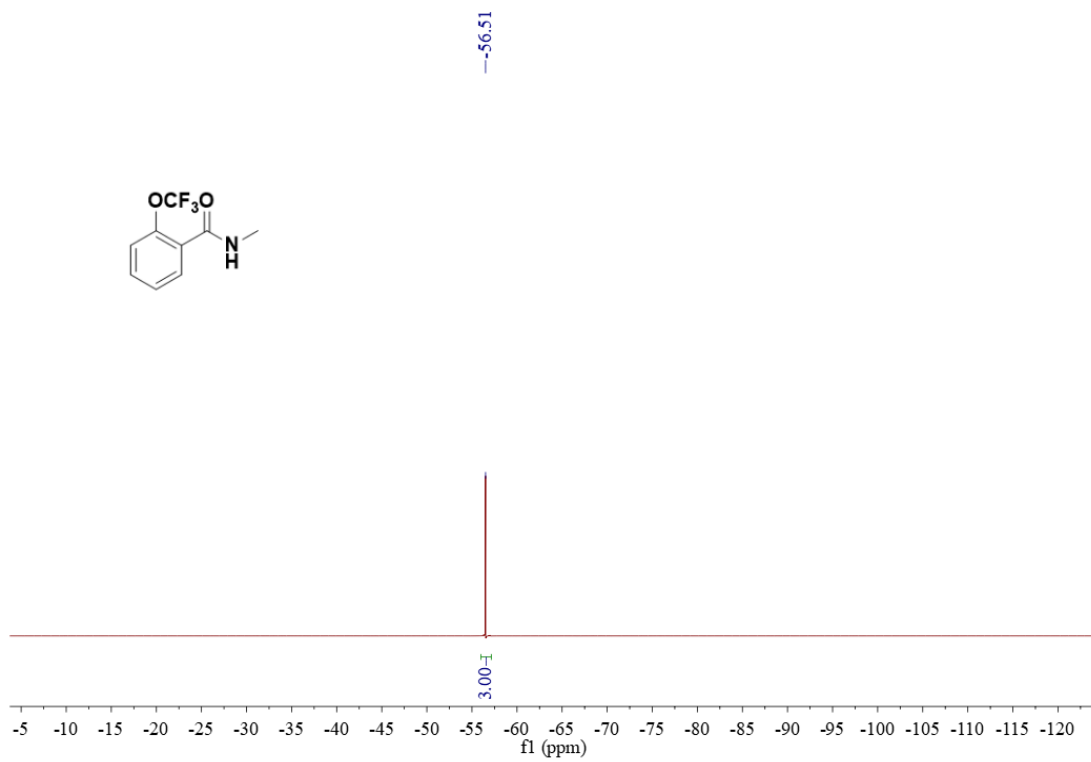



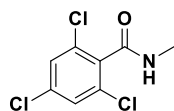

### 2,4,6-trichloro-*N*-methylbenzamide (3p)

petroleum ether / ethyl acetate = 2:1, white solid, 59% yield (28.0 mg). mp: 184 – 185°C.  $^1\text{H NMR}$  (400 MHz, DMSO-*d*<sub>6</sub>)  $\delta$  8.60 (d,  $J = 4.4$  Hz, 1H), 7.74 (s, 2H), 2.77 (d,  $J = 4.7$  Hz, 3H).  $^{13}\text{C NMR}$  (100 MHz, DMSO-*d*<sub>6</sub>)  $\delta$  163.30, 135.74, 134.23, 132.04, 127.88, 25.79. **HRMS** (ESI-TOF): Anal Calcd. For.  $\text{C}_8\text{H}_6^{35}\text{Cl}_3\text{NO} + \text{Na}^+$ : 259.09407, Found: 259.9410. Anal Calcd. For.  $\text{C}_8\text{H}_6^{35,35,37}\text{Cl}_3\text{NO} + \text{Na}^+$ : 261.9378, Found: 261.9356. Anal Calcd. For.  $\text{C}_8\text{H}_6^{35,37,37}\text{Cl}_3\text{NO} + \text{Na}^+$ : 263.9348, Found: 263.9298. **IR** (neat,  $\text{cm}^{-1}$ ):  $\nu$  3280, 2943, 1646, 1546, 1488, 1309, 920, 849.

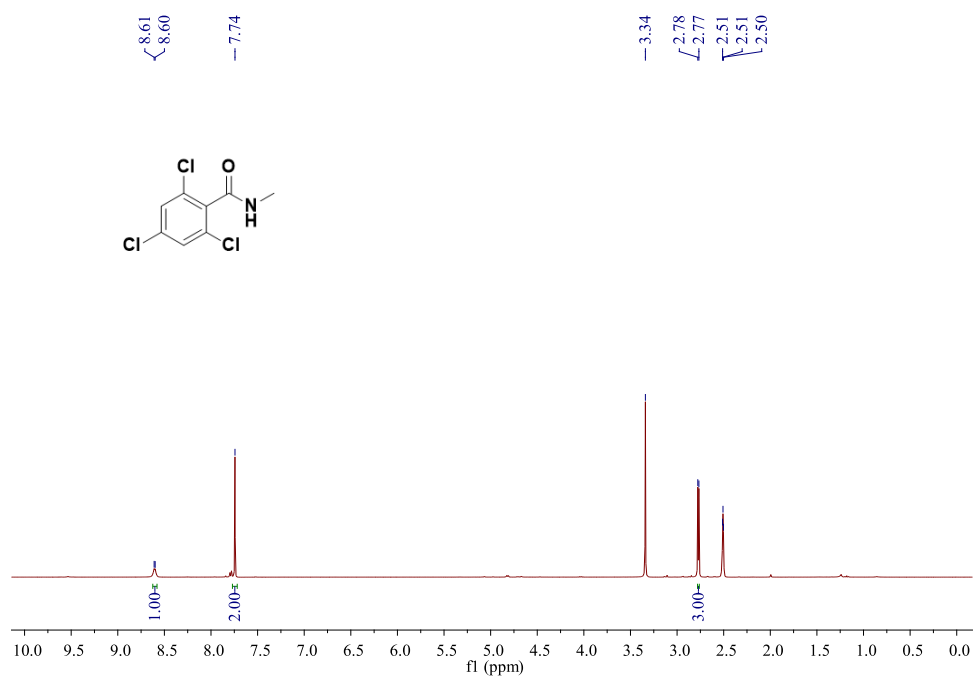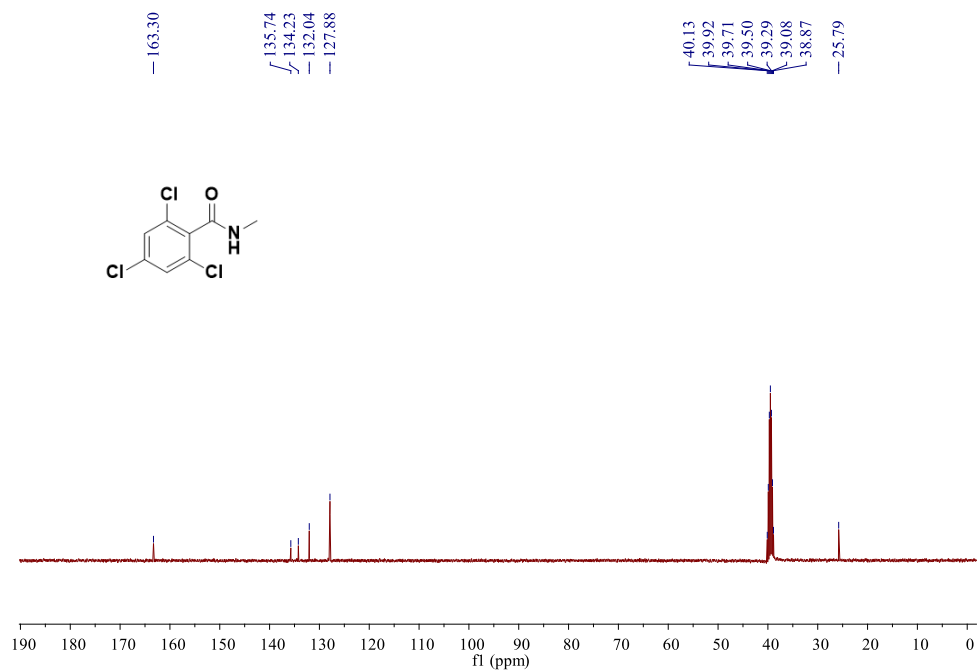

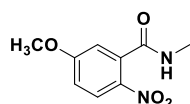

### 5-Methoxy-*N*-methyl-2-nitrobenzamide (3q)

petroleum ether / ethyl acetate = 1:1, yellow solid, 51% yield (21.4 mg). mp: 159 – 161°C.  $^1\text{H NMR}$  (400 MHz, DMSO-*d*<sub>6</sub>)  $\delta$  8.48 (d,  $J$  = 4.2 Hz, 1H), 8.07 (d,  $J$  = 9.1 Hz, 1H), 7.15 (dd,  $J$  = 9.1, 2.8 Hz, 1H), 7.05 (d,  $J$  = 2.8 Hz, 1H), 3.90 (s, 3H), 2.75 (d,  $J$  = 4.7 Hz, 3H).  $^{13}\text{C NMR}$  (75 MHz, DMSO-*d*<sub>6</sub>)  $\delta$  165.91, 163.05, 139.29, 135.75, 126.79, 114.91, 114.06, 56.39, 26.06. **HRMS** (ESI-TOF): Anal Calcd. For. C<sub>9</sub>H<sub>10</sub>N<sub>2</sub>O<sub>4</sub> +Na<sup>+</sup>: 233.0533, Found: 233.0540. **IR** (neat, cm<sup>-1</sup>):  $\nu$  3270, 2943, 1637, 1563, 1509, 1405, 1323, 888, 830, 796.

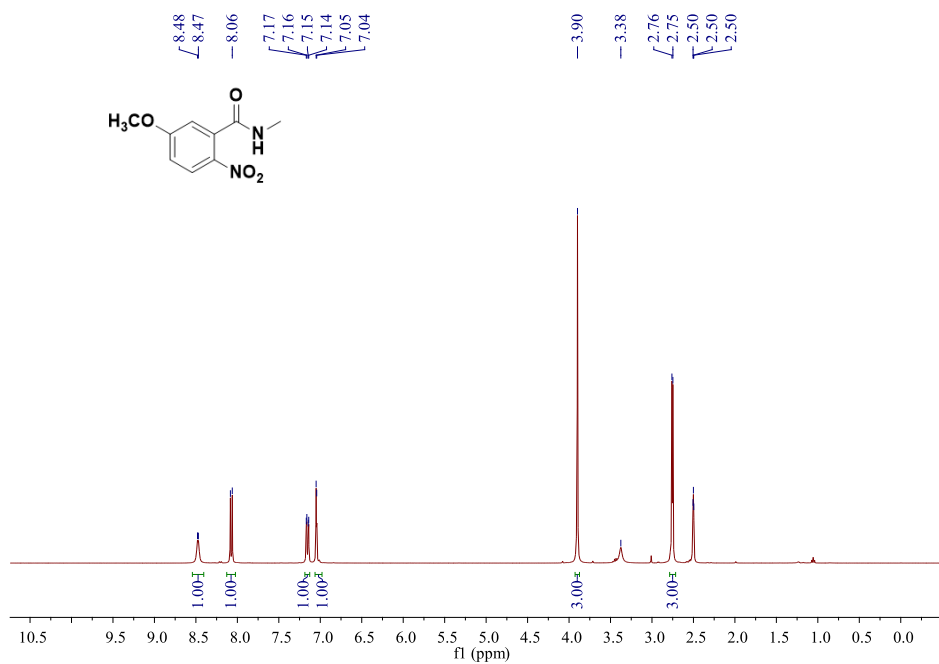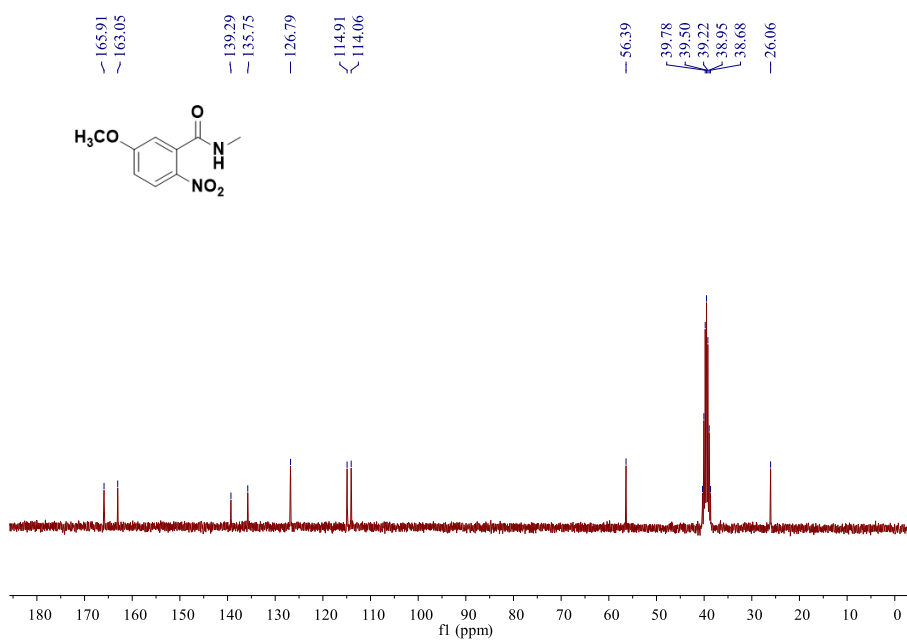

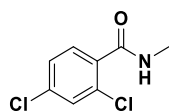

### 2,4-Dichloro-*N*-methylbenzamide (3r)

petroleum ether / ethyl acetate = 2:1, white solid, 52% yield (21.1 mg). mp: 125 – 127°C.  $^1\text{H NMR}$  (400 MHz,  $\text{DMSO-}d_6$ )  $\delta$  8.40 (d,  $J = 4.1$  Hz, 1H), 7.67 (d,  $J = 1.8$  Hz, 1H), 7.49 – 7.43 (m, 2H), 2.75 (d,  $J = 4.7$  Hz, 3H).  $^{13}\text{C NMR}$  (100 MHz,  $\text{DMSO-}d_6$ )  $\delta$  165.81, 135.87, 134.36, 131.10, 130.21, 129.10, 127.28, 25.96. **HRMS** (ESI-TOF): Anal Calcd. For.  $\text{C}_8\text{H}_7^{35}\text{Cl}_2\text{NO}+\text{Na}^+$ : 225.9797, Found: 225.9800. Anal Calcd. For.  $\text{C}_8\text{H}_7^{37,35}\text{Cl}_2\text{NO}+\text{Na}^+$ : 227.9767, Found: 227.9760. Anal Calcd. For.  $\text{C}_8\text{H}_7^{35}\text{Cl}_2\text{NO}+\text{Na}^+$ : 229.9738, Found: 229.9731. **IR** (neat,  $\text{cm}^{-1}$ ):  $\nu$  3282, 2981, 1646, 1592, 1444, 1321, 881, 828, 788.

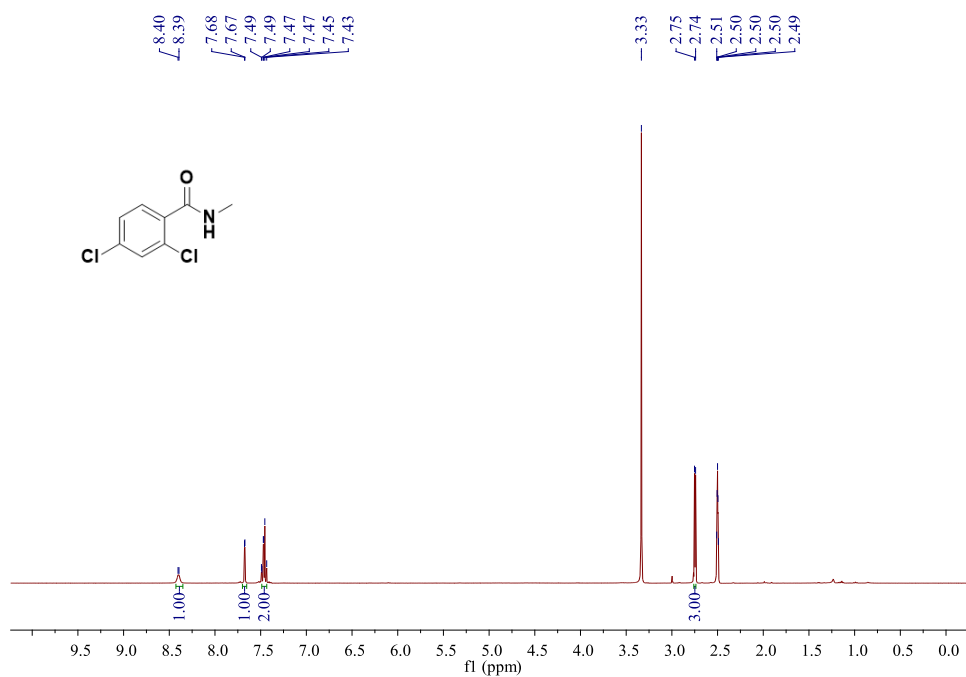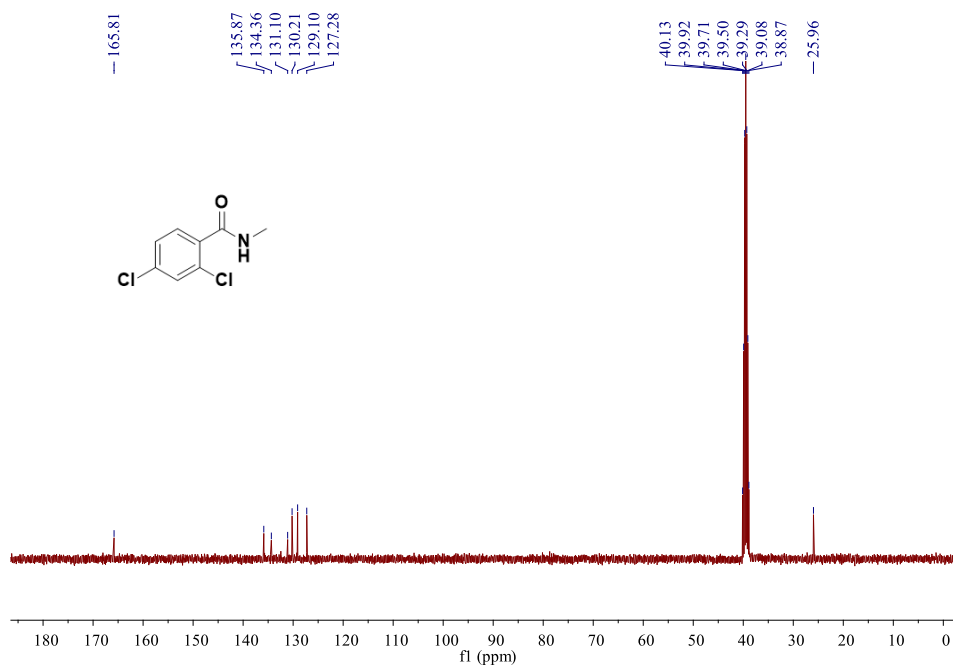

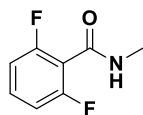

### 2,6-Difluoro-*N*-methylbenzamide (3s)

petroleum ether / ethyl acetate = 2:1, yellow solid, 49% yield (16.8 mg). mp: 123 – 125°C.  $^1\text{H NMR}$  (400 MHz, DMSO-*d*<sub>6</sub>)  $\delta$  8.62 (s, 1H), 7.52 – 7.46 (m, 1H), 7.18 – 7.13 (m, 2H), 2.77 (d,  $J = 4.7$  Hz, 3H).  $^{13}\text{C NMR}$  (100 MHz, DMSO-*d*<sub>6</sub>)  $\delta$  160.03 (t,  $J = 4.1$  Hz), 157.57 (d,  $J = 8.1$  Hz), 131.45 (t,  $J = 10.0$  Hz), 115.55 (t,  $J = 23.2$  Hz), 111.86 (dd,  $J = 13.0, 6.0$  Hz), 25.94.  $^{19}\text{F NMR}$  (377 MHz, DMSO-*d*<sub>6</sub>)  $\delta$  -114.18 (s, 2F). **HRMS** (ESI-TOF): Anal Calcd. For. C<sub>8</sub>H<sub>7</sub>F<sub>2</sub>NO +Na<sup>+</sup>: 194.0388, Found: 194.0380. **IR** (neat, cm<sup>-1</sup>):  $\nu$  3280, 2881, 1646, 1593, 1488, 1325, 1299, 845, 766.

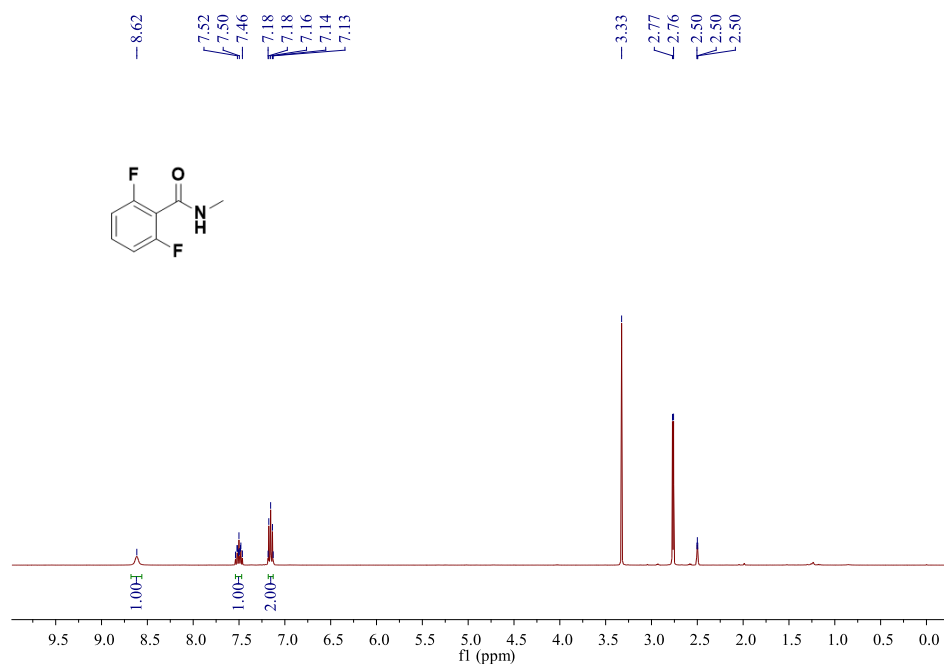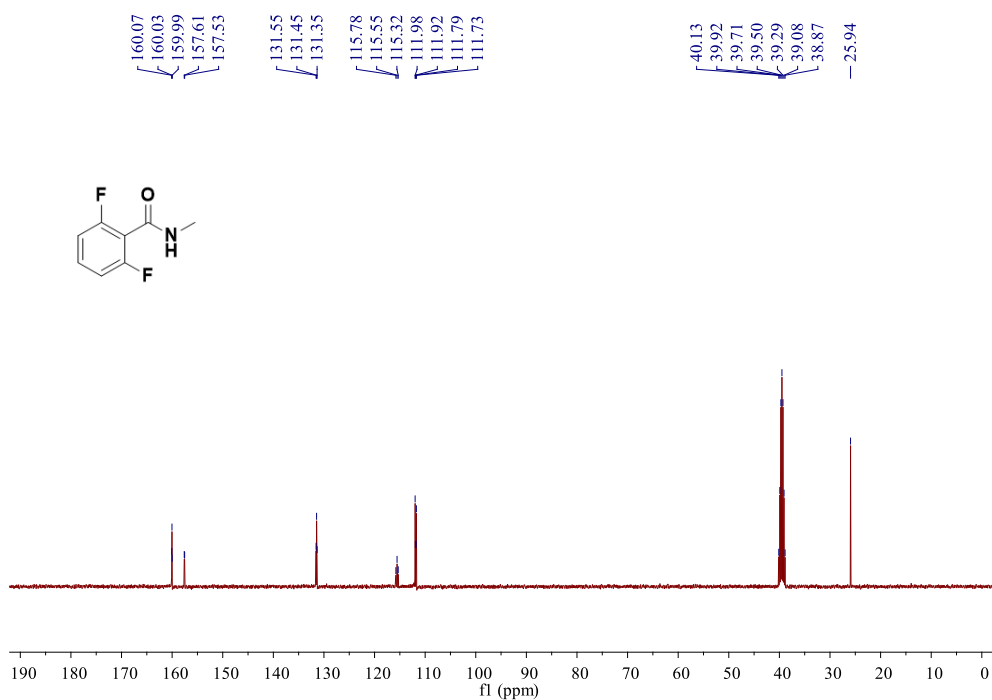

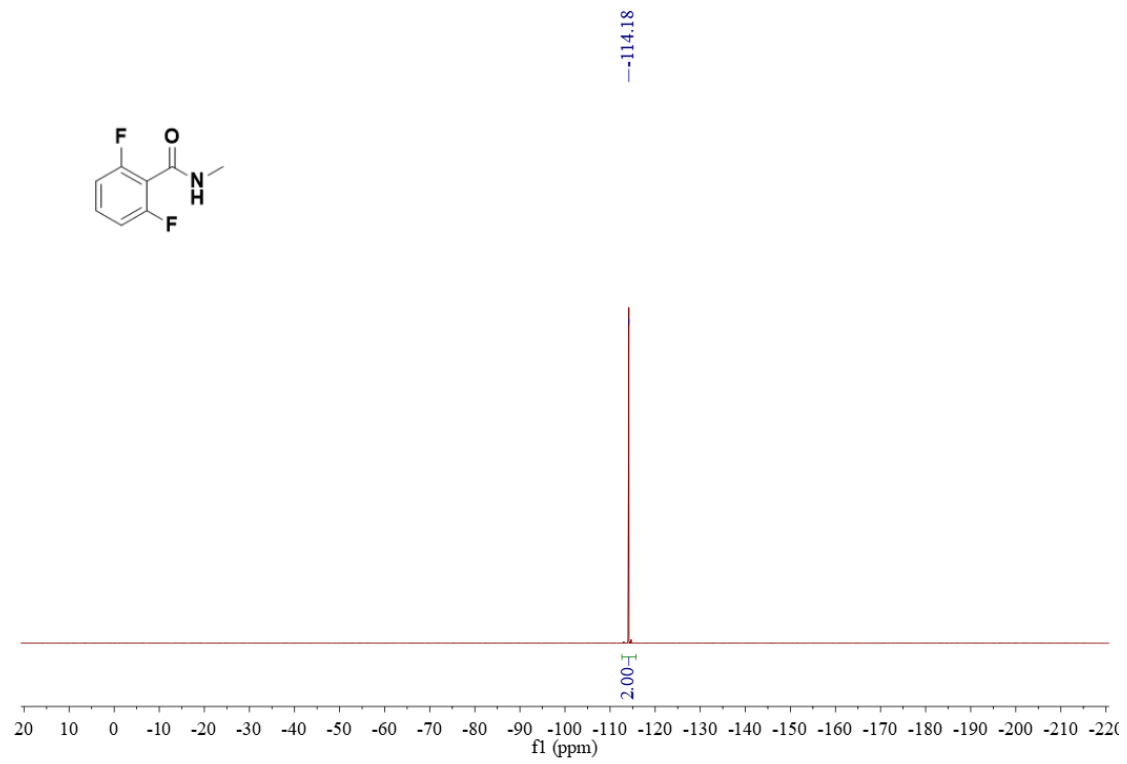

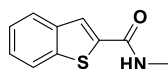

***N*-Methylbenzothiophene-2-carboxamide (3t)**

petroleum ether / ethyl acetate = 2:1, white solid, 51% yield (19.5 mg). mp: 200 – 201°C. <sup>1</sup>H NMR (400 MHz, DMSO-*d*<sub>6</sub>) δ 8.72 (d, *J* = 4.1 Hz, 1H), 8.02 – 7.99 (m, 2H), 7.94 – 7.91 (m, 1H), 7.47 – 7.40 (m, 2H), 2.81 (d, *J* = 4.6 Hz, 3H). <sup>13</sup>C NMR (100 MHz, DMSO-*d*<sub>6</sub>) δ 161.89, 140.05, 139.16, 126.07, 125.08, 124.86, 124.36, 122.77, 26.19. HRMS (ESI-TOF): Anal Calcd. For. C<sub>10</sub>H<sub>9</sub>NOS+Na<sup>+</sup>: 214.0297, Found: 214.0309. IR (neat, cm<sup>-1</sup>): ν 3314, 3060, 1626, 1557, 1495, 1300, 757.

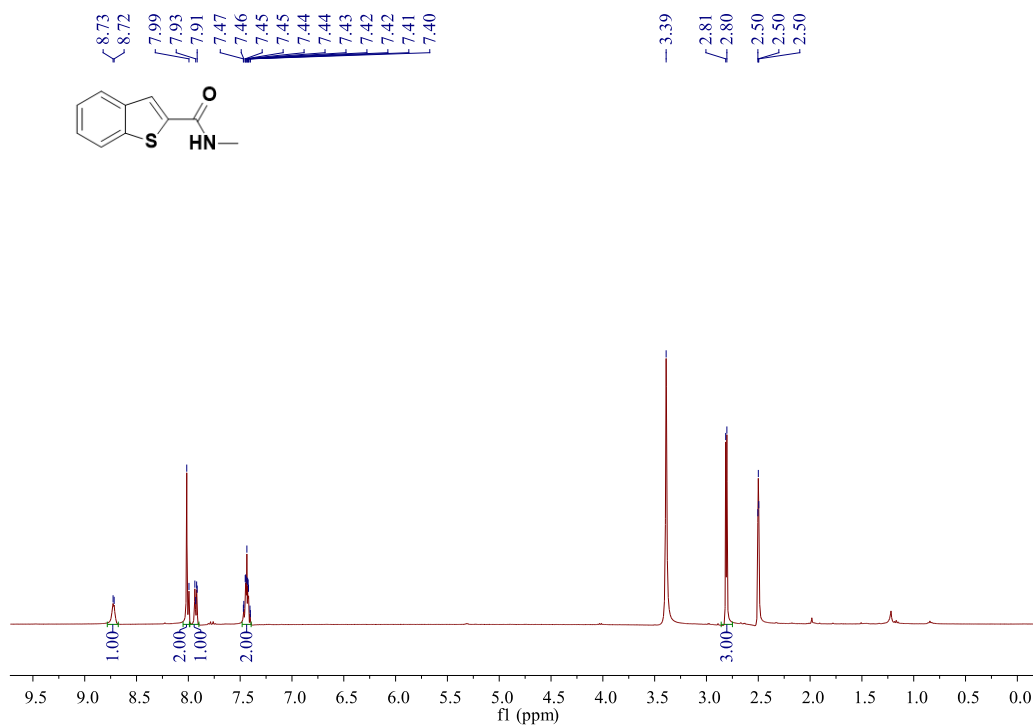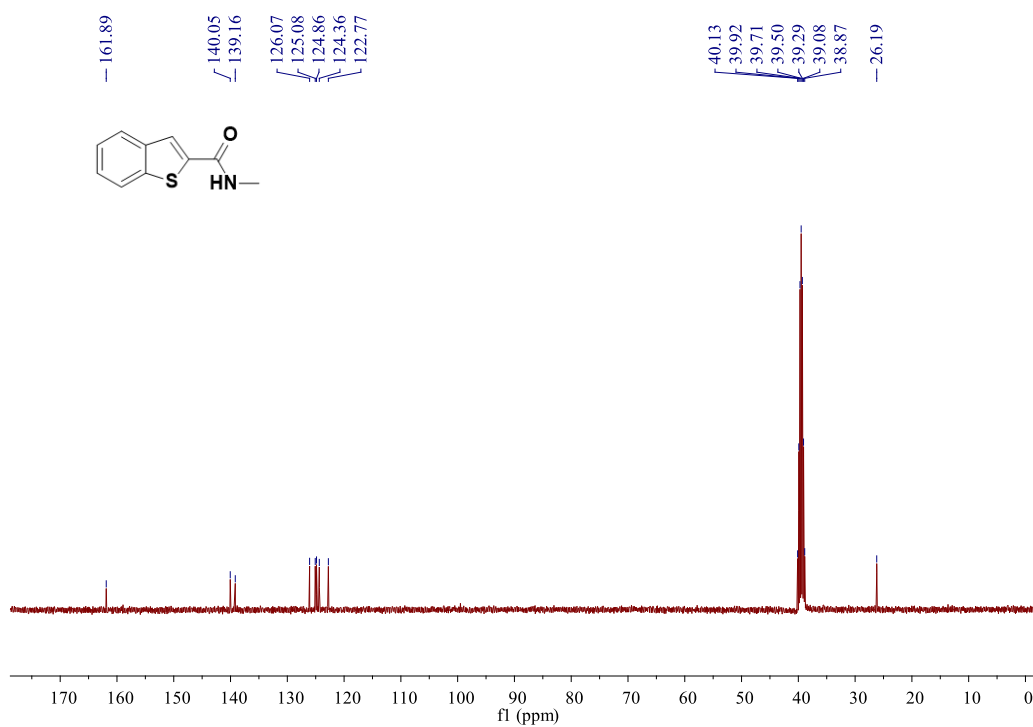

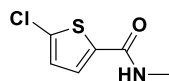

### 5-Chloro-*N*-methylthiophene-2-carboxamide (**3u**)

petroleum ether / ethyl acetate = 2:1, white solid, 70% yield (24.5 mg). mp: 170 – 172°C. <sup>1</sup>H NMR (400 MHz, DMSO-*d*<sub>6</sub>) δ 8.53 (d, *J* = 3.7 Hz, 1H), 7.56 (d, *J* = 4.0 Hz, 1H), 7.16 (d, *J* = 4.0 Hz, 1H), 2.74 (d, *J* = 4.6 Hz, 3H). <sup>13</sup>C NMR (100 MHz, DMSO-*d*<sub>6</sub>) δ 160.50, 139.21, 132.55, 128.00, 127.54, 25.93. HRMS (ESI-TOF): Anal Calcd. For. C<sub>6</sub>H<sub>6</sub><sup>35</sup>ClNOS+Na<sup>+</sup>: 197.9751, Found: 197.9750. Anal Calcd. For. C<sub>6</sub>H<sub>6</sub><sup>37</sup>ClNOS+Na<sup>+</sup>: 199.9721, Found: 199.9718. IR (neat, cm<sup>-1</sup>): ν 3282, 2982, 1645, 1593, 1429, 1299, 812, 791.

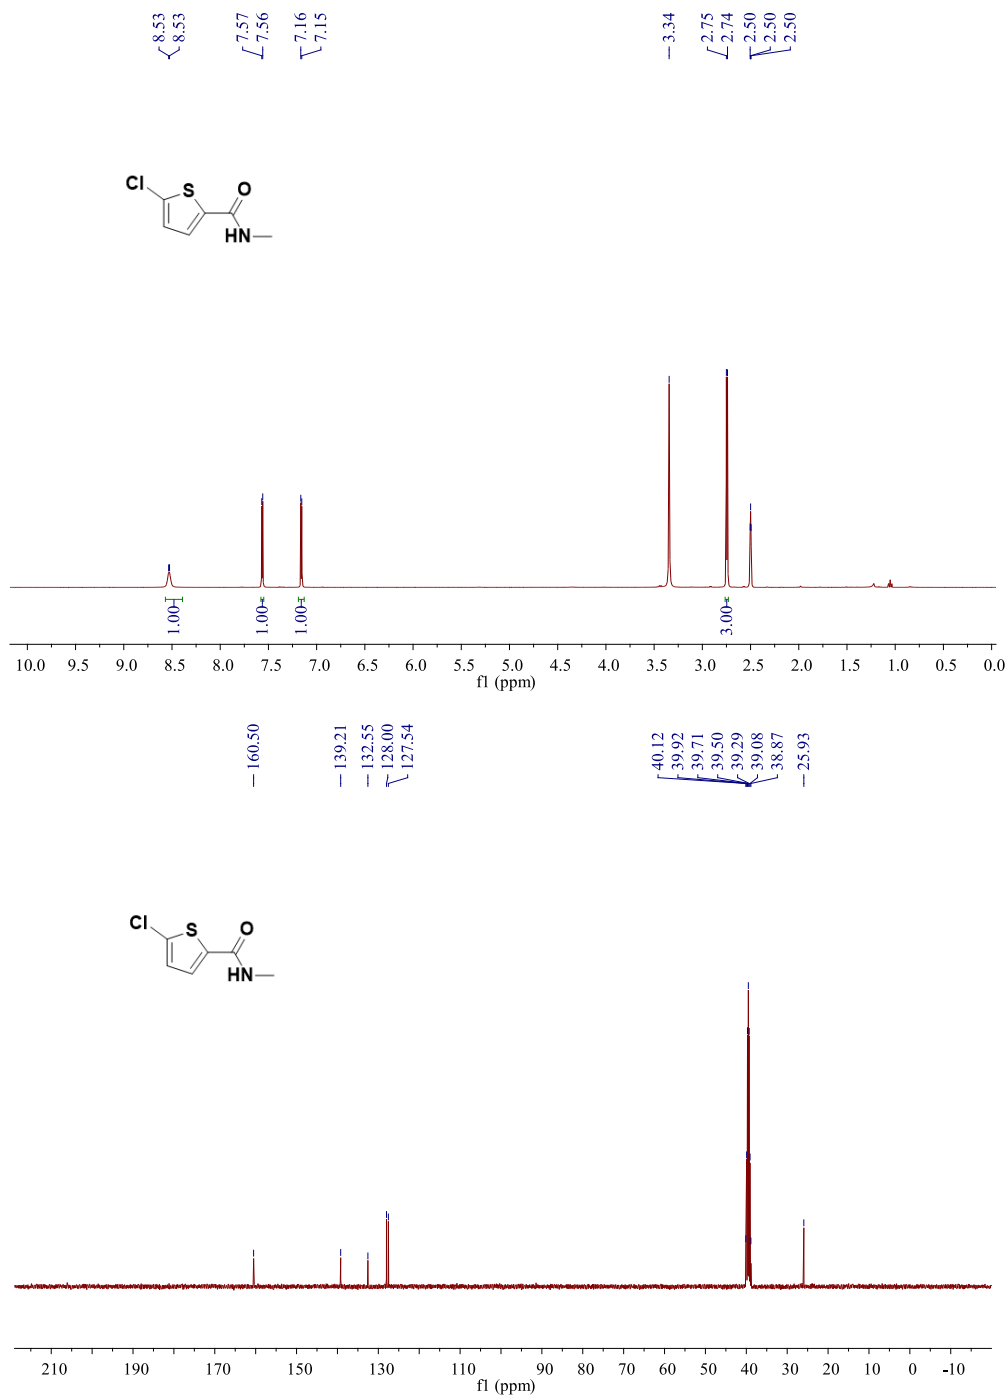

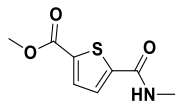

**Methyl 5-(methylcarbamoyl)thiophene-2-carboxylate (3v)**

petroleum ether / ethyl acetate = 2:1, white solid, 57% yield (22.7 mg). mp: 148 – 150°C. <sup>1</sup>H NMR (400 MHz, DMSO-*d*<sub>6</sub>) δ 8.72 (d, *J* = 4.4 Hz, 1H), 7.78 (d, *J* = 4.0 Hz, 1H), 7.71 (d, *J* = 4.0 Hz, 1H), 3.83 (s, 1H), 2.78 (d, *J* = 4.6 Hz, 3H). <sup>13</sup>C NMR (100 MHz, DMSO-*d*<sub>6</sub>) δ 161.61, 160.62, 146.07, 135.30, 133.88, 127.98, 52.50, 26.09. HRMS (ESI-TOF): Anal Calcd. For. C<sub>8</sub>H<sub>9</sub>NO<sub>3</sub>S + Na<sup>+</sup>: 222.0195, Found: 222.0196. IR (neat, cm<sup>-1</sup>): ν 3262, 2937, 1654, 1572, 1480, 1348, 1264, 820, 730.

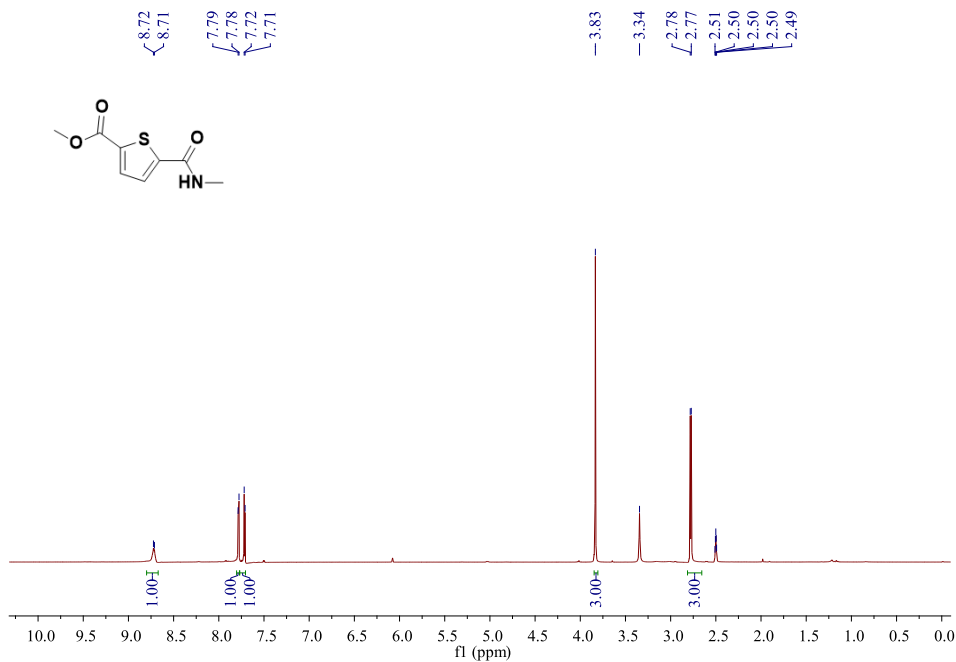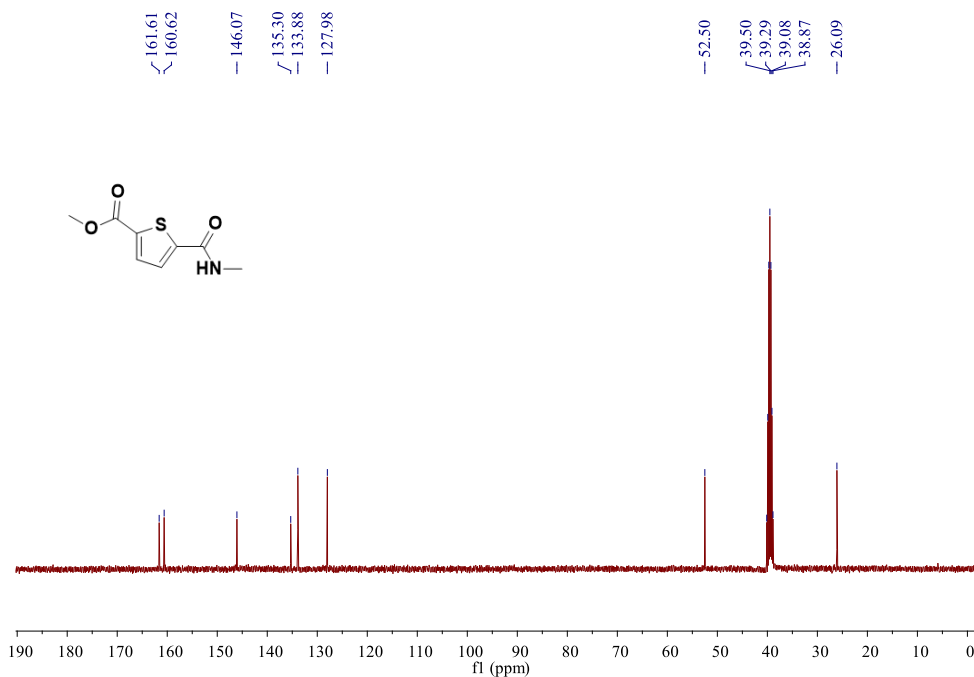



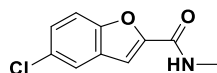

**5-Chloro-N-methylbenzofuran-2-carboxamide (3w)**

petroleum ether / ethyl acetate = 2:1, white solid, 43% yield (18.0 mg). mp: 160 – 162°C. **<sup>1</sup>H NMR** (400 MHz, DMSO-*d*<sub>6</sub>) δ 8.74 (d, *J* = 4.4 Hz, 1H), 7.86 (d, *J* = 2.1 Hz, 1H), 7.68 (d, *J* = 8.8 Hz, 1H), 7.48 (d, *J* = 2.1 Hz, 1H), 2.88 – 2.72 (m, 1H). **<sup>13</sup>C NMR** (100 MHz, DMSO-*d*<sub>6</sub>) δ 158.20, 152.67, 150.68, 128.81, 128.02, 126.68, 122.12, 113.45, 108.59, 25.78. **HRMS** (ESI-TOF): Anal Calcd. For. C<sub>10</sub>H<sub>8</sub><sup>35</sup>ClNO<sub>2</sub>+Na<sup>+</sup>: 232.0136, Found: 232.0140. Anal Calcd. For. C<sub>10</sub>H<sub>8</sub><sup>37</sup>ClNO<sub>2</sub>+Na<sup>+</sup>: 234.0106, Found: 234.0069. **IR** (neat, cm<sup>-1</sup>): ν 3331, 2930, 1655, 1599, 1440, 1348, 880, 776.

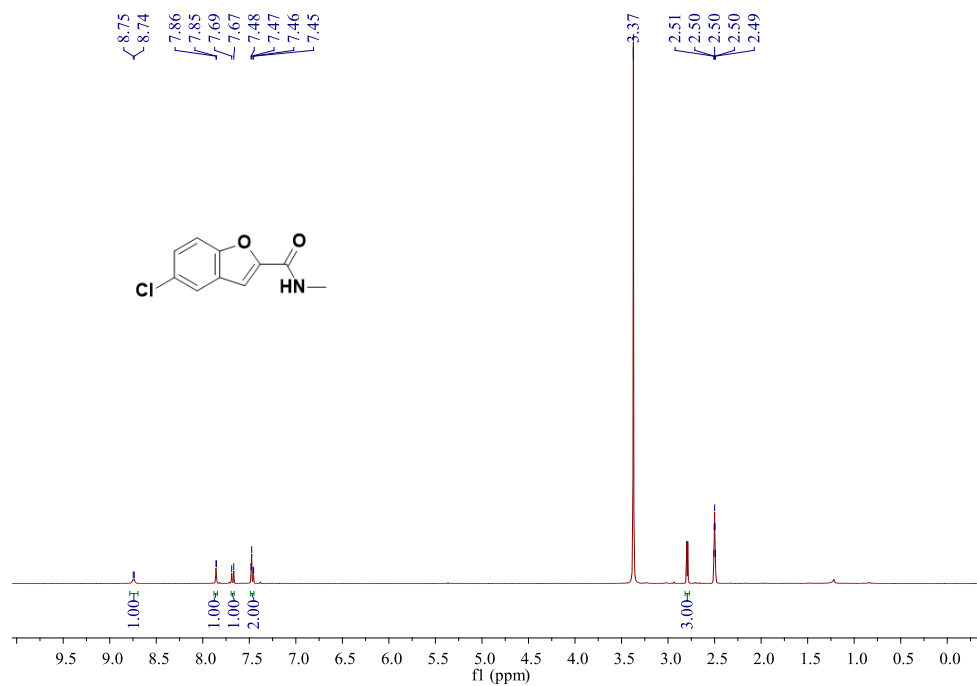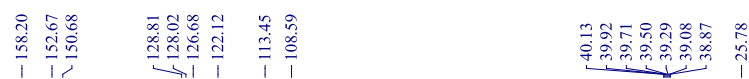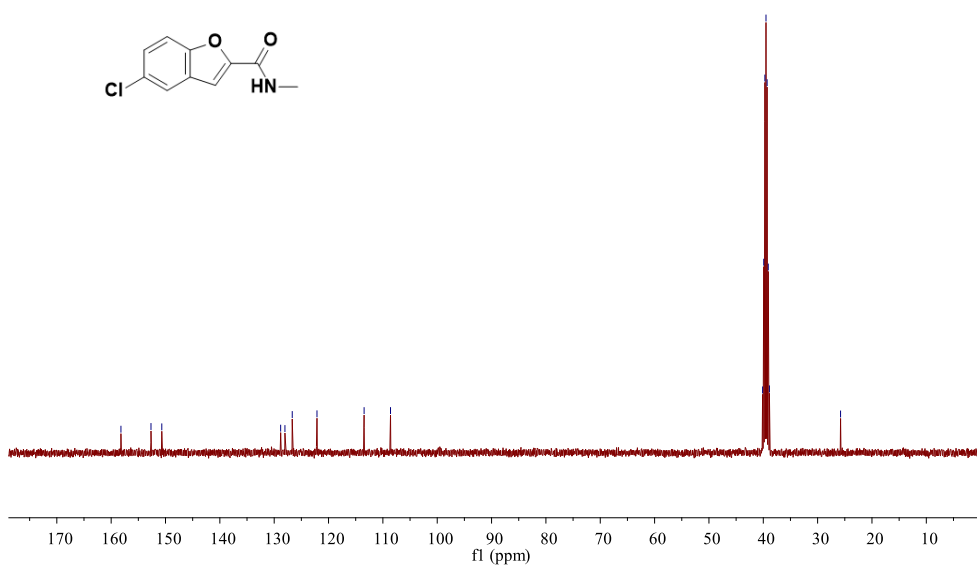

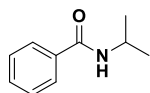

### *N*-Isopropylbenzamide (3x)

petroleum ether / ethyl acetate = 2:1, white solid, 49% yield (16.0 mg). mp: 84 – 86°C.  $^1\text{H NMR}$  (400 MHz, DMSO-*d*<sub>6</sub>)  $\delta$  8.20 (d,  $J = 7.3$  Hz, 1H), 7.84 – 7.82 (m, 2H), 7.52 – 7.42 (m, 3H), 4.14 – 4.05 (m, 1H), 1.16 (d,  $J = 6.6$  Hz, 6H).  $^{13}\text{C NMR}$  (100 MHz, DMSO-*d*<sub>6</sub>)  $\delta$  165.32, 134.84, 130.91, 128.12, 127.20, 40.94, 22.34. **HRMS** (ESI-TOF): Anal Calcd. For. C<sub>10</sub>H<sub>13</sub>NO+Na<sup>+</sup>: 186.0889, Found: 186.0885. **IR** (neat, cm<sup>-1</sup>):  $\nu$  3333, 2937, 1719, 1661, 1599, 1407, 758, 692.

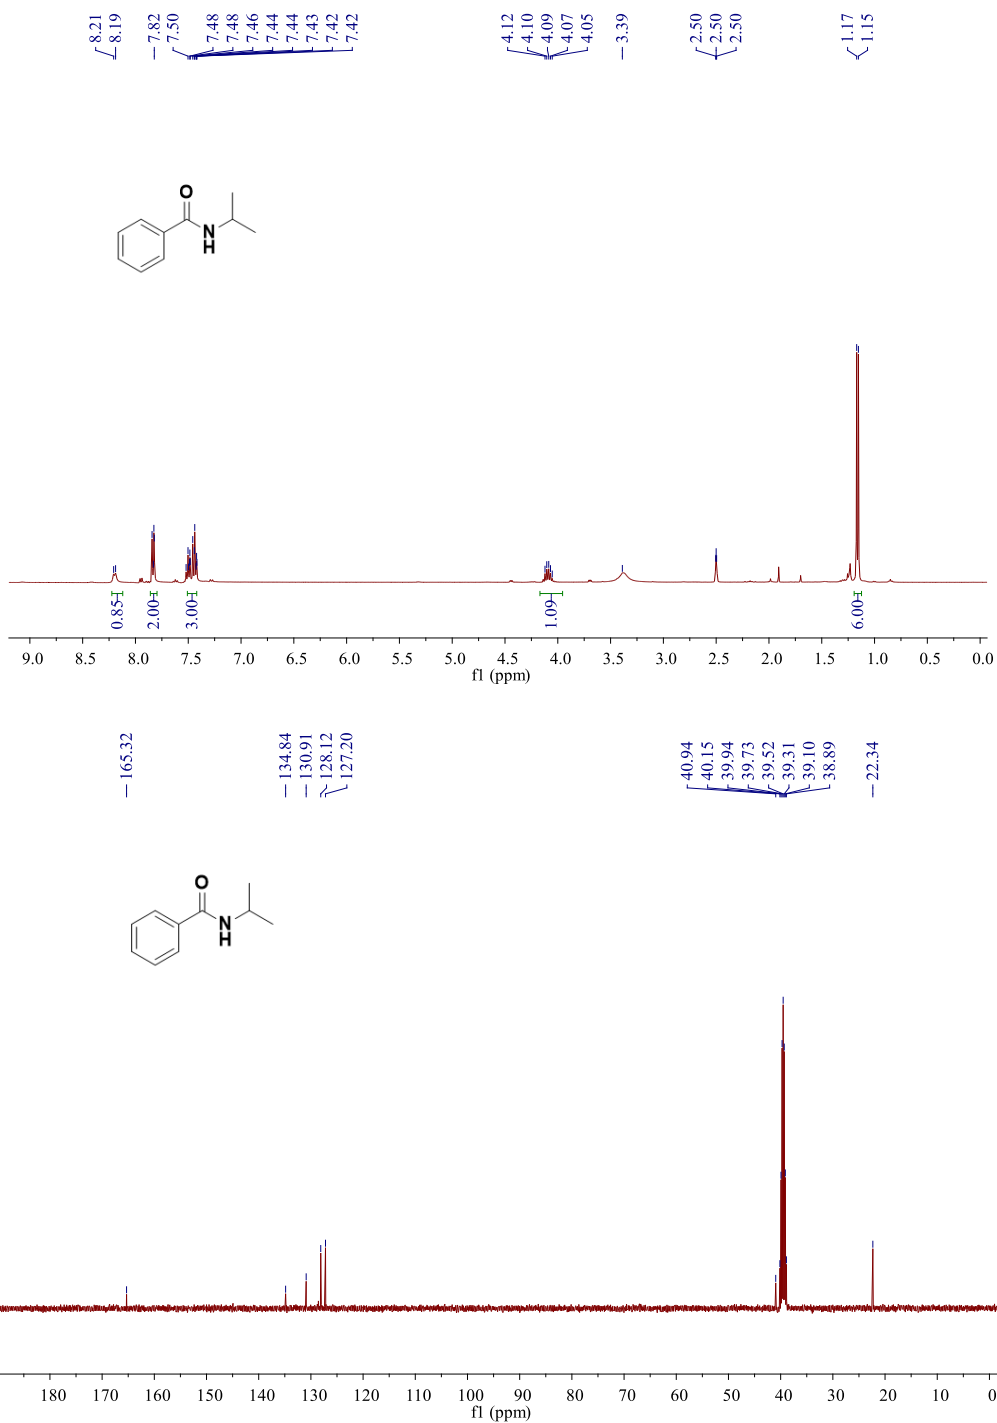

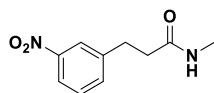

***N*-Methyl-3-(3-nitrophenyl)propanamide (3y)**

petroleum ether / ethyl acetate = 1:1, yellow solid, 42% yield (17.5 mg). mp: 84 – 85°C. <sup>1</sup>H NMR (400 MHz, DMSO-*d*<sub>6</sub>) δ 8.07 – 8.03 (m, 2H), 7.77 (s, 1H), 7.67 (d, *J* = 7.6 Hz, 1H), 7.57 (t, *J* = 7.6 Hz, 1H), 2.95 (t, *J* = 7.6 Hz, 2H), 2.54 (d, *J* = 4.6 Hz, 3H), 2.42 (t, *J* = 7.6 Hz, 2H). <sup>13</sup>C NMR (100 MHz, DMSO-*d*<sub>6</sub>) δ 171.22, 147.74, 143.75, 135.29, 129.68, 122.86, 120.98, 36.28, 30.43, 25.40. HRMS (ESI-TOF): Anal Calcd. For. C<sub>10</sub>H<sub>12</sub>N<sub>2</sub>O<sub>3</sub>+Na<sup>+</sup>: 231.0740, Found: 231.0747. IR (neat, cm<sup>-1</sup>): ν 3262, 2932, 1635, 1572, 1348, 887, 730.

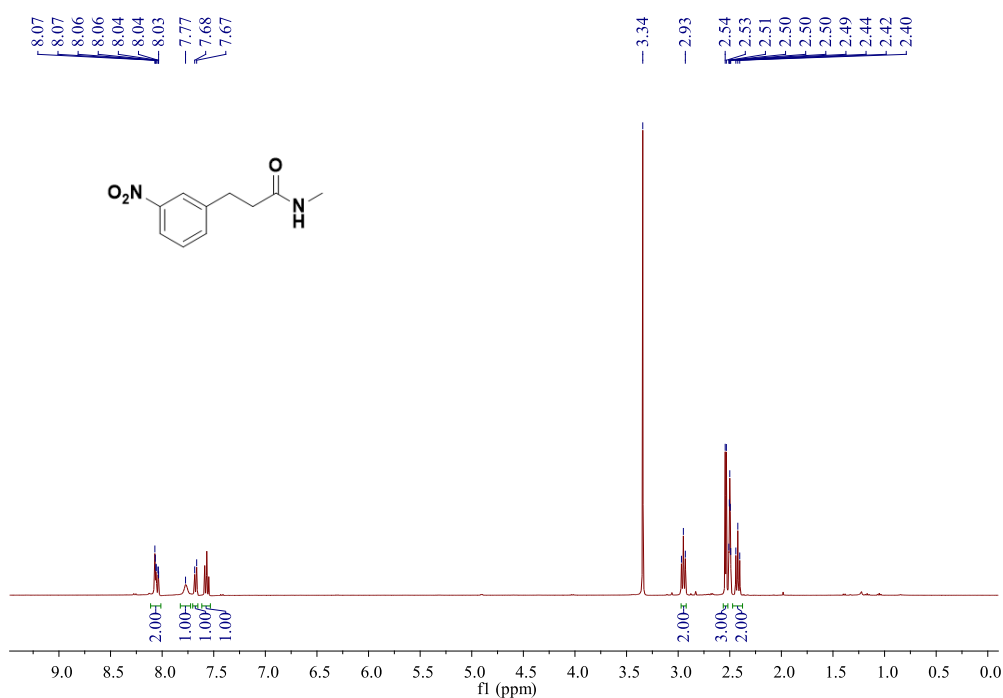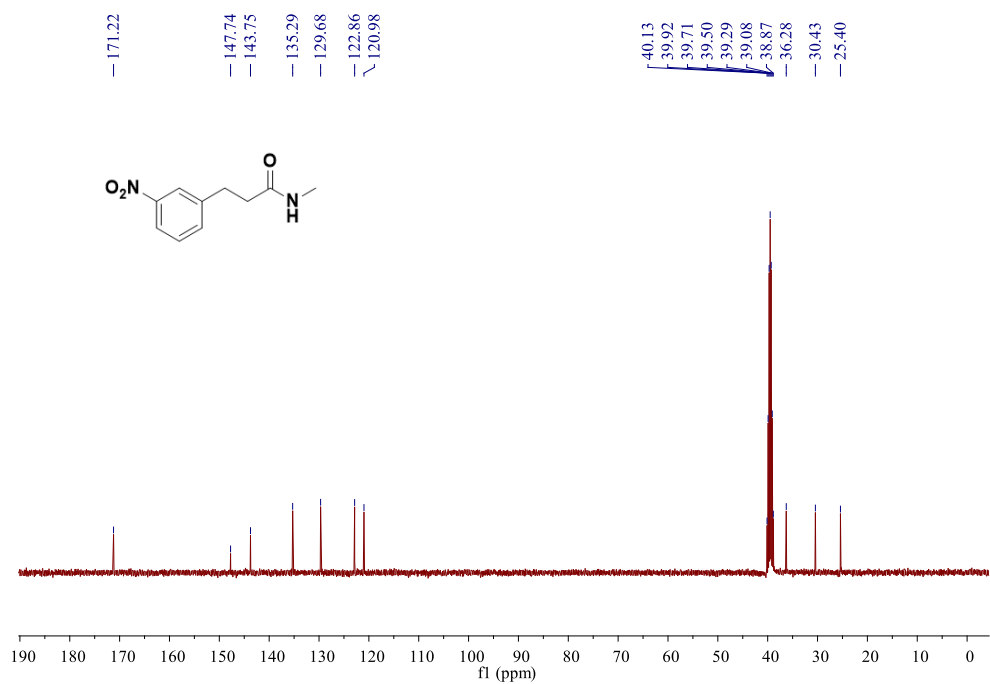

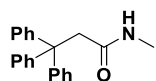

***N*-methyl-3,3,3-triphenylpropanamide (3z)**

petroleum ether / ethyl acetate = 2:1, white solid, 68% yield (42.9 mg). mp: 210 – 211°C. <sup>1</sup>H NMR (400 MHz, DMSO-*d*<sub>6</sub>) δ 7.42 (d, *J* = 4.5 Hz, 1H), 7.25 – 7.14 (m, 15H), 3.54 (s, 2H), 2.26 (d, *J* = 4.6 Hz, 3H). <sup>13</sup>C NMR (100 MHz, DMSO-*d*<sub>6</sub>) δ 170.05, 147.26, 129.16, 127.41, 125.74, 55.79, 46.43, 25.30. HRMS (ESI-TOF): Anal Calcd. For. C<sub>22</sub>H<sub>21</sub>NO+Na<sup>+</sup>: 338.1515, Found: 338.1523. IR (neat, cm<sup>-1</sup>): ν 3262, 2935, 1657, 1594, 1407, 1363, 763, 695.

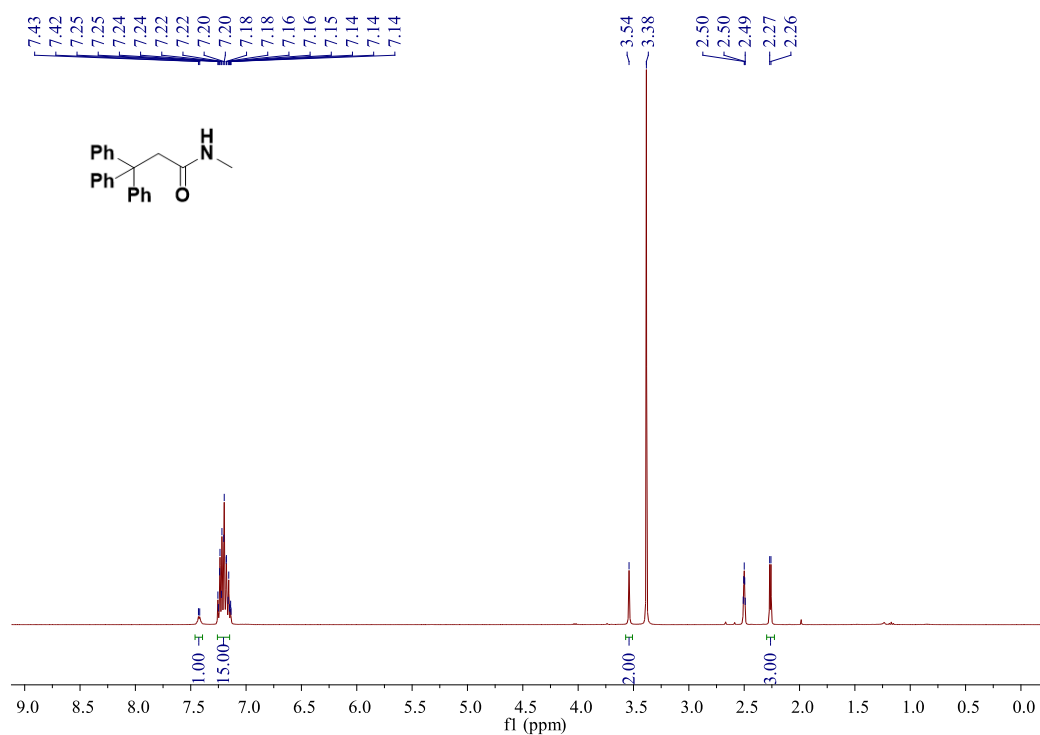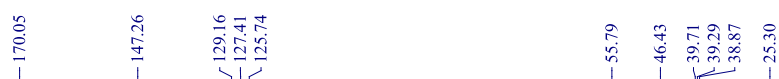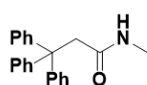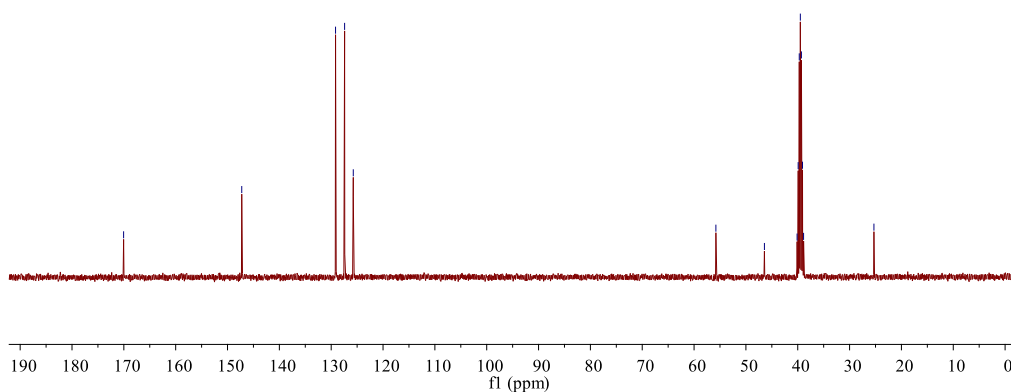

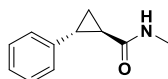

**(1R,2R)-N-methyl-2-phenylcyclopropane-1-carboxamide (3aa)**

petroleum ether / ethyl acetate = 5:1, yellow solid, 33% yield (11.6 mg). mp: 98 – 100°C. <sup>1</sup>H NMR (400 MHz, DMSO-*d*<sub>6</sub>) δ 8.04 (s, 1H), 7.28 – 7.24 (m, 2H), 7.18 – 7.14 (m, 1H), 7.12 – 7.10 (m, 2H), 2.61 (d, *J* = 4.6 Hz, 3H), 2.25 – 2.20 (m, 1H), 1.83 – 1.79 (m, 1H), 1.36 – 1.32 (m, 1H), 1.20 – 1.16 (m, 1H). <sup>13</sup>C NMR (100 MHz, DMSO-*d*<sub>6</sub>) δ 171.29, 141.15, 128.29, 125.89, 125.77, 25.77, 25.68, 23.70, 15.02. HRMS (ESI-TOF): Anal Calcd. For. C<sub>11</sub>H<sub>13</sub>NO+Na<sup>+</sup>: 198.0889, Found: 198.0898. IR (neat, cm<sup>-1</sup>): ν 3346, 1634, 1589, 1458, 958, 845, 764.

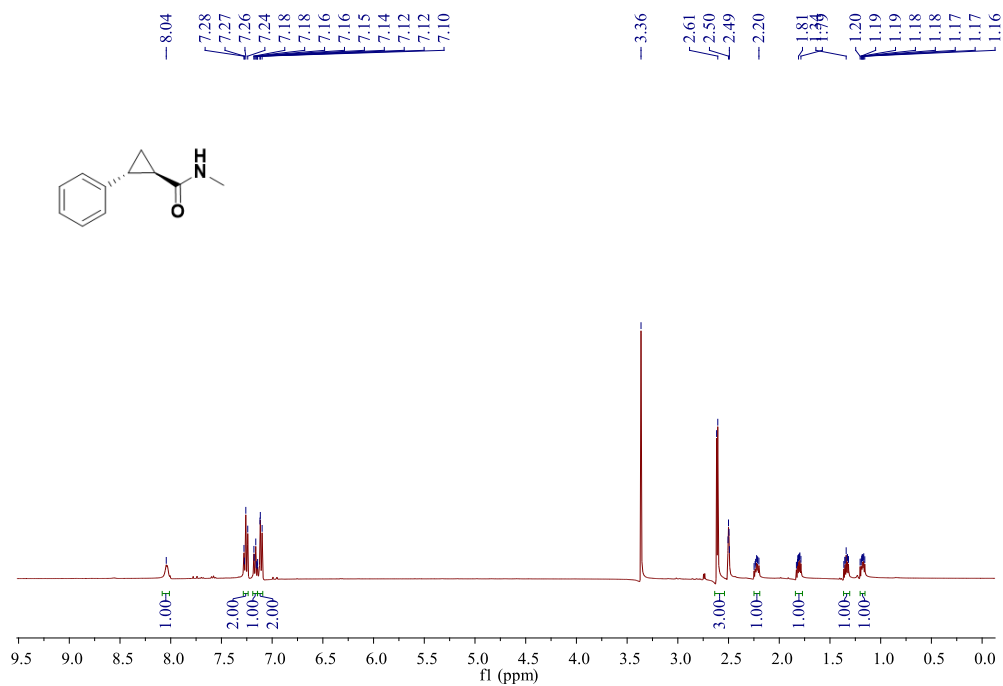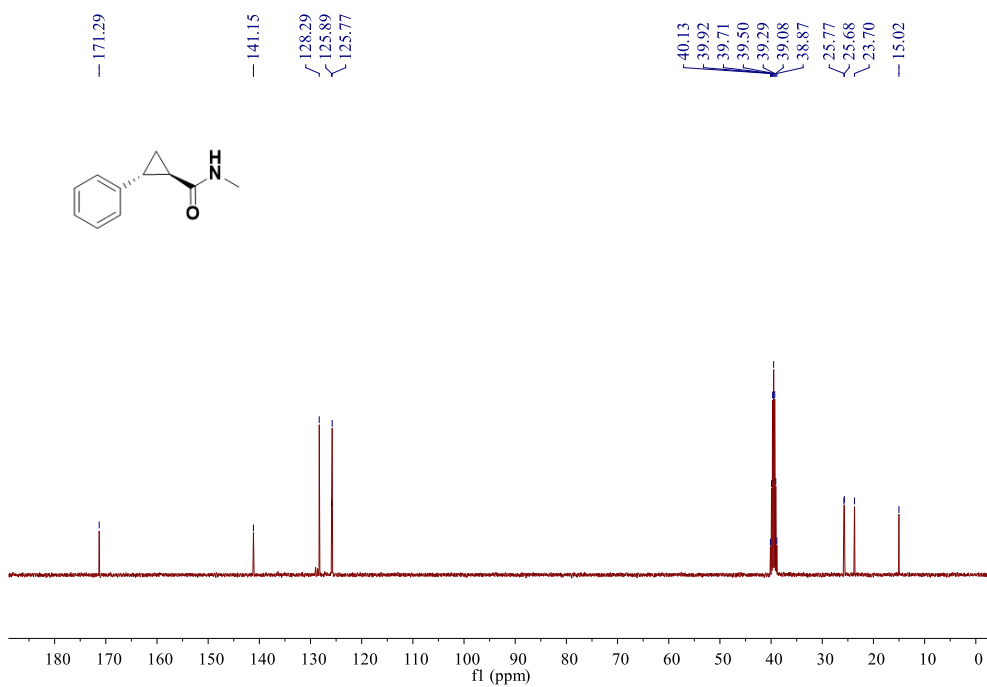

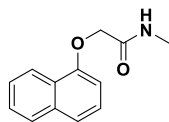

**N-Methyl-2-(naphthalen-1-yloxy)acetamide (3ab)**

petroleum ether / ethyl acetate = 2:1, light yellow solid, 50% yield (21.5 mg). mp: 98 – 100°C. <sup>1</sup>H NMR (400 MHz, DMSO-*d*<sub>6</sub>) δ 8.42 – 8.40 (m, 1H), 8.09 (s, 1H), 7.89 – 7.87 (m, 1H), 7.55 – 7.50 (m, 3H), 7.43 – 7.39 (m, 1H), 6.91 (d, *J* = 7.3 Hz, 1H), 4.66 (s, 2H), 2.72 (d, *J* = 4.7 Hz, 3H). <sup>13</sup>C NMR (100 MHz, DMSO-*d*<sub>6</sub>) δ 167.79, 153.17, 134.03, 127.33, 126.54, 126.03, 125.26, 124.75, 122.20, 120.66, 105.59, 67.39, 25.50. **HRMS** (ESI-TOF): Anal Calcd. For. C<sub>13</sub>H<sub>13</sub>NO<sub>2</sub> +Na<sup>+</sup>: 238.0838, Found: 238.0841. **IR** (neat, cm<sup>-1</sup>): ν 3262, 2937, 1655, 1572, 1457, 1348, 1264, 765, 682.

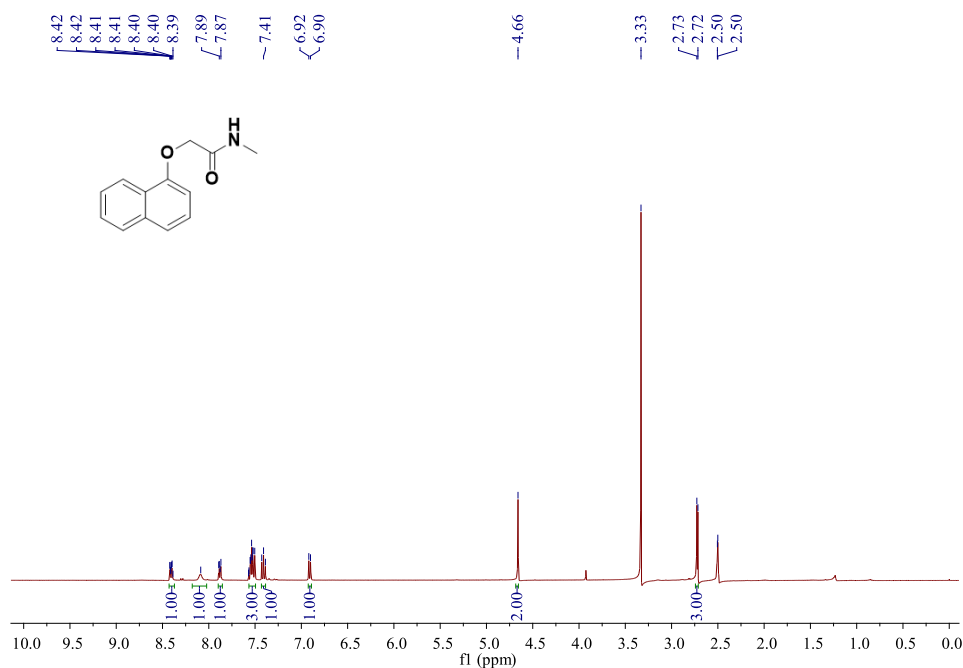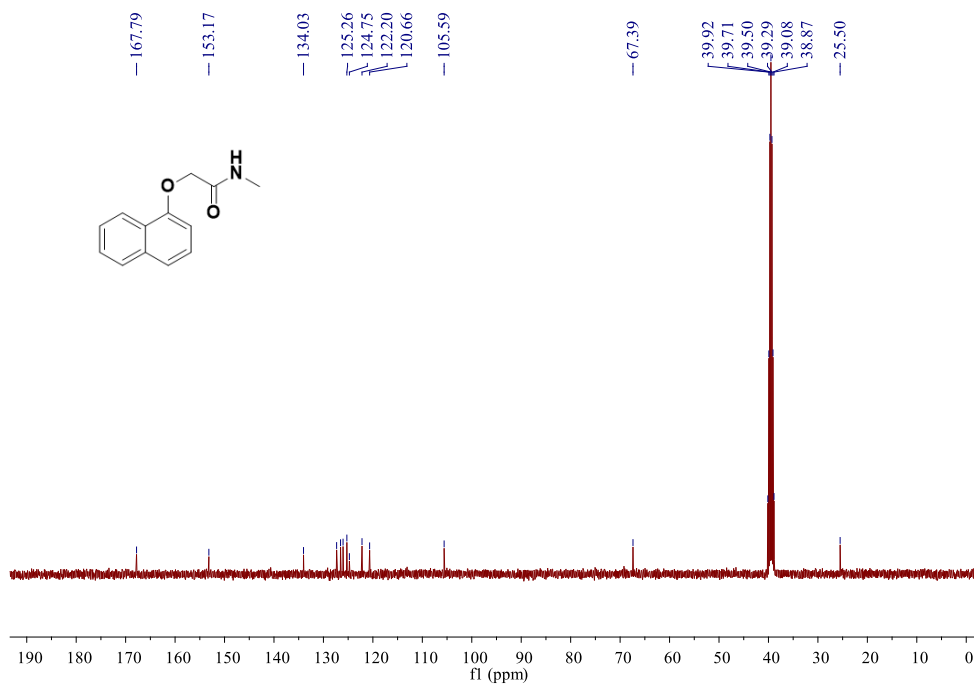

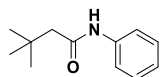

### 3,3-Dimethyl-N-phenylbutanamide (3ac)

petroleum ether / ethyl acetate = 2:1, white solid, 57% yield (21.8 mg). mp: 130 – 131°C.  $^1\text{H NMR}$  (300 MHz, DMSO- $d_6$ )  $\delta$  9.76 (s, 1H), 7.58 (d,  $J$  = 8.0 Hz, 2H), 7.28 (t,  $J$  = 8.0 Hz, 2H), 7.02 (t,  $J$  = 7.4 Hz, 1H), 2.18 (s, 2H), 1.02 (s, 9H).  $^{13}\text{C NMR}$  (75 MHz, DMSO- $d_6$ )  $\delta$  169.97, 139.25, 128.61, 122.98, 119.19, 49.60, 30.84, 29.63. **HRMS** (ESI-TOF): Anal Calcd. For.  $\text{C}_{12}\text{H}_{17}\text{NO} + \text{Na}^+$ : 214.1202, Found: 214.1209. **IR** (neat,  $\text{cm}^{-1}$ ):  $\nu$  3262, 2937, 1654, 1573, 1434, 1348, 730, 683.

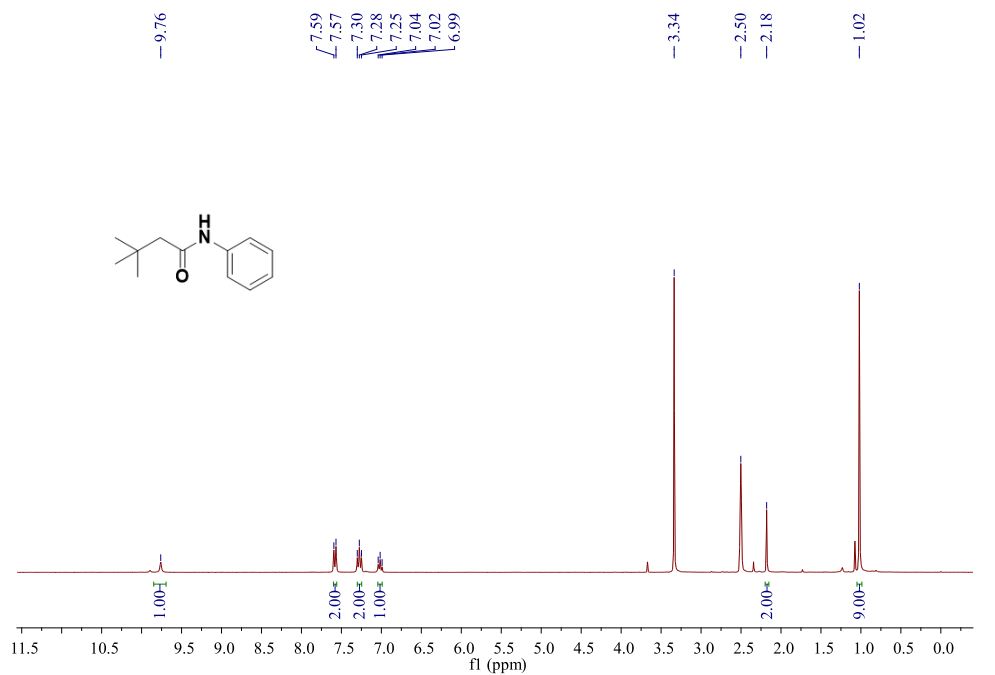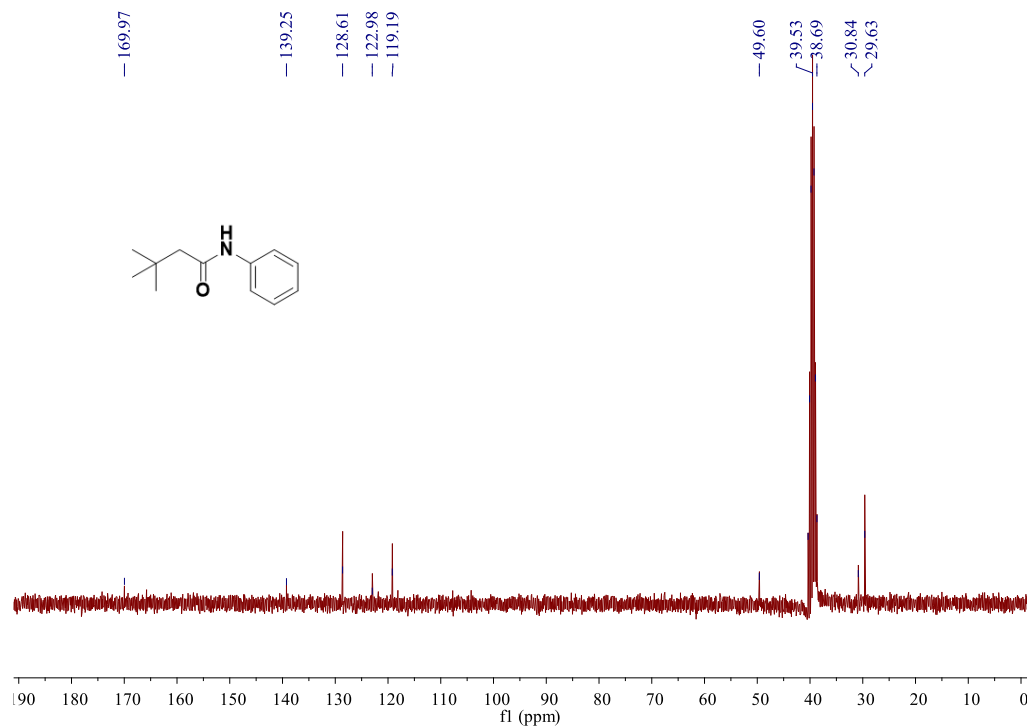

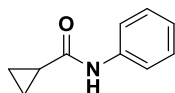

### *N*-phenylcyclopropanecarboxamide (3ad)

petroleum ether / ethyl acetate = 5:1, white solid, 80% yield (25.8 mg). mp: 109 – 111°C. <sup>1</sup>H NMR (400 MHz, DMSO-*d*<sub>6</sub>) δ 10.16 (s, 1H), 7.58 (d, *J* = 7.6 Hz, 2H), 7.30 – 7.26 (m, 2H), 7.01 (t, *J* = 7.6 Hz, 1H), 1.80 – 1.74 (m, 1H), 0.80 – 0.76 (m, 4H). <sup>13</sup>C NMR (100 MHz, DMSO-*d*<sub>6</sub>) δ 171.55, 139.34, 128.65, 122.85, 118.93, 14.50, 7.09. HRMS (ESI-TOF): Anal Calcd. For. C<sub>10</sub>H<sub>11</sub>NO+Na<sup>+</sup>: 184.0733, Found: 184.0727. IR (neat, cm<sup>-1</sup>): ν 3277, 2960, 1651, 1540, 1439, 1307, 754, 693.

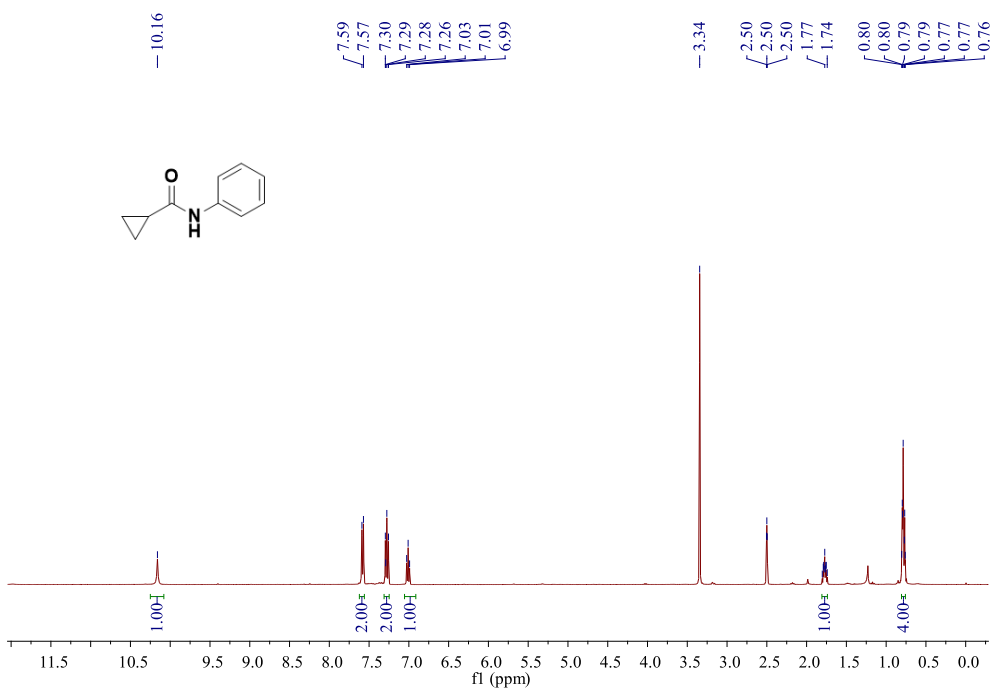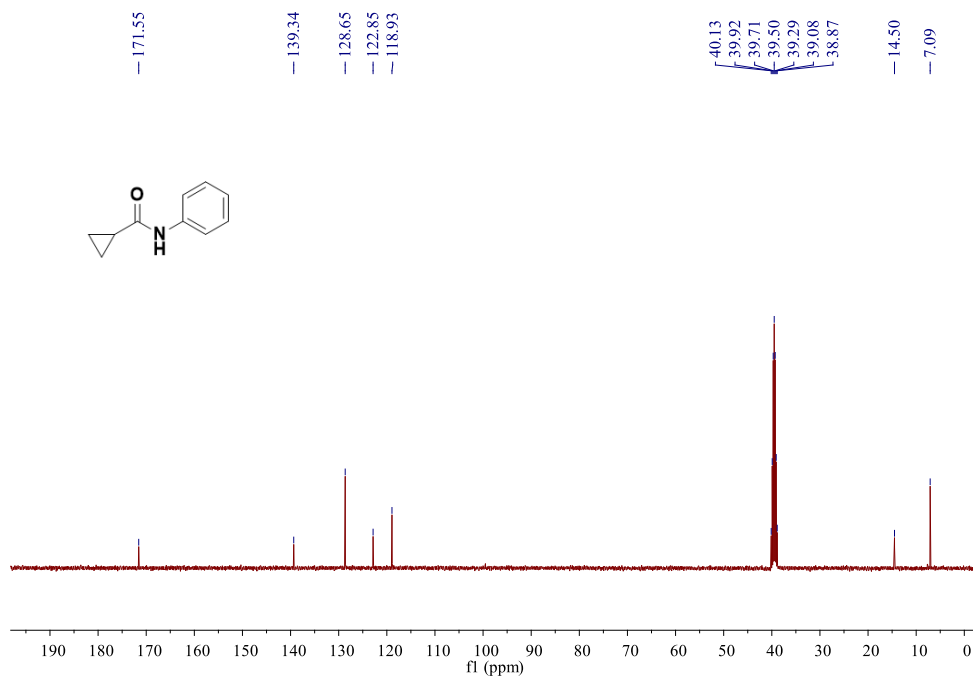



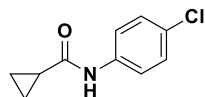

***N*-(4-chlorophenyl)cyclopropanecarboxamide (3ae)**

petroleum ether / ethyl acetate = 5:1, white solid, 68% yield (26.5 mg). mp: 164 – 165°C. <sup>1</sup>H NMR (400 MHz, DMSO-*d*<sub>6</sub>) δ 10.31 (s, 1H), 7.62 – 7.60 (m, 2H), 7.34 – 7.32 (m, 2H), 1.77 – 1.74 (m, 1H), 0.80 – 0.78 (m, 4H). <sup>13</sup>C NMR (100 MHz, DMSO-*d*<sub>6</sub>) δ 171.74, 138.27, 128.56, 126.39, 120.45, 14.55, 7.27. HRMS (ESI-TOF): Anal Calcd. For. C<sub>10</sub>H<sub>10</sub><sup>35</sup>ClNO+Na<sup>+</sup>: 218.0343, Found: 218.0340. Anal Calcd. For. C<sub>10</sub>H<sub>10</sub><sup>37</sup>ClNO+Na<sup>+</sup>: 220.0314, Found: 220.0307. IR (neat, cm<sup>-1</sup>): ν 3281, 2920, 1653, 1593, 1445, 1390, 828, 782.

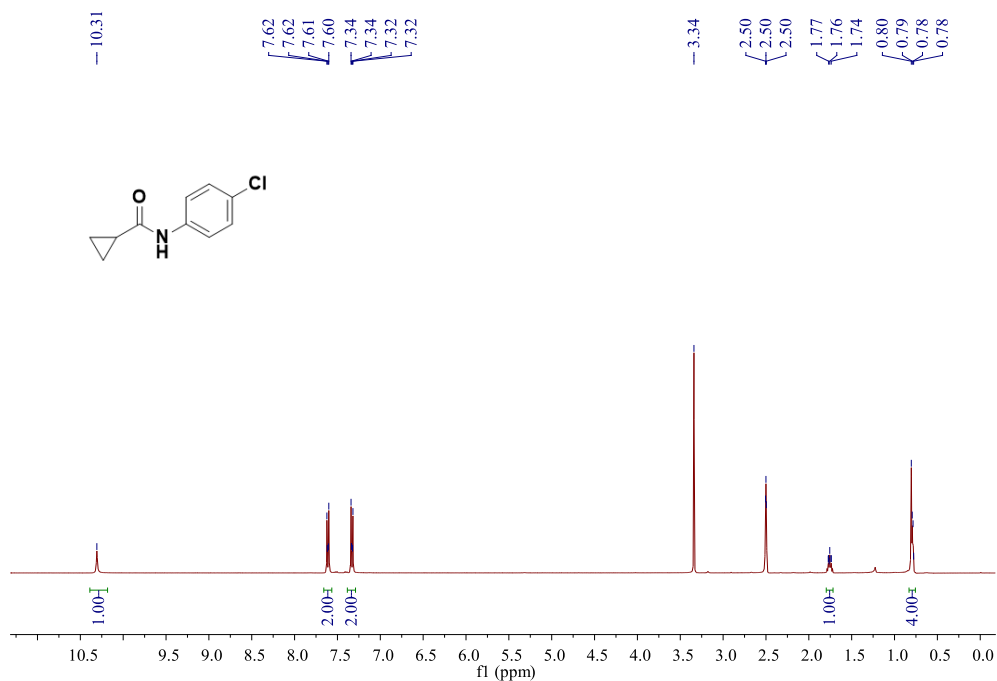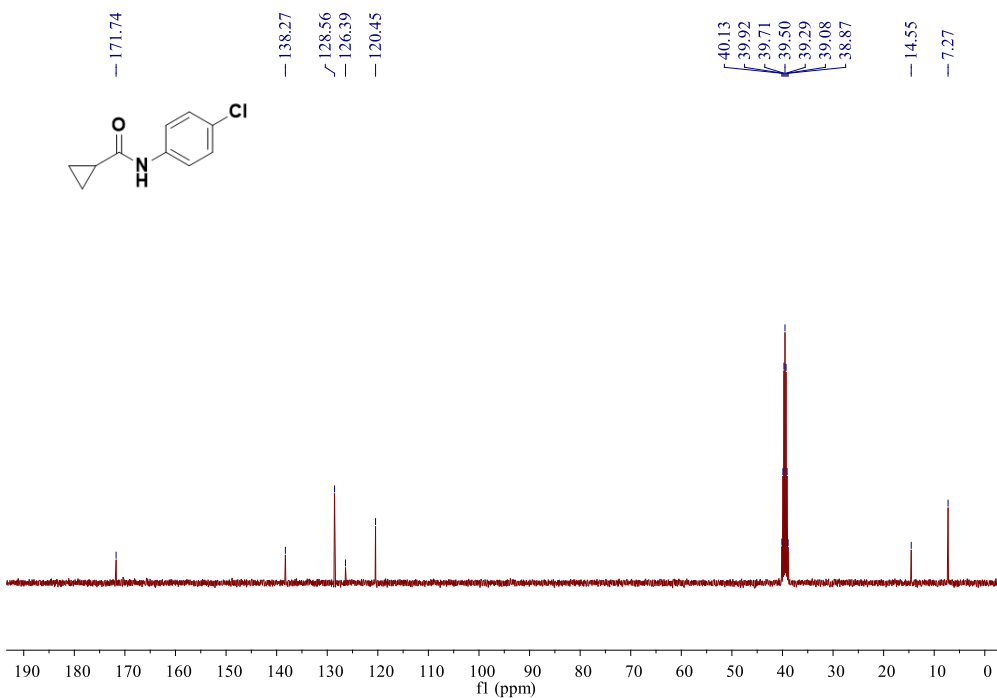

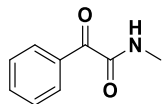

***N*-Methyl-2-oxo-2-phenylacetamide (3af)**

petroleum ether / ethyl acetate = 5:1, yellow solid, 41% yield (13.4 mg). mp: 66 – 68°C. <sup>1</sup>H NMR (300 MHz, DMSO-*d*<sub>6</sub>) δ 8.85 (s, 1H), 7.99 (d, *J* = 7.5 Hz, 2H), 7.75 – 7.70 (m, 1H), 7.60 – 7.55 (m, 2H), 2.77 (d, *J* = 4.7 Hz, 3H). <sup>13</sup>C NMR (75 MHz, DMSO-*d*<sub>6</sub>) δ 190.31, 165.20, 134.53, 132.94, 129.84, 128.91, 25.27. HRMS (ESI-TOF): Anal Calcd. For. C<sub>9</sub>H<sub>9</sub>NO<sub>2</sub>+Na<sup>+</sup>: 186.0525, Found: 186.0520. IR (neat, cm<sup>-1</sup>): ν 3327, 2932, 1686, 1594, 1447, 1308, 746, 685.

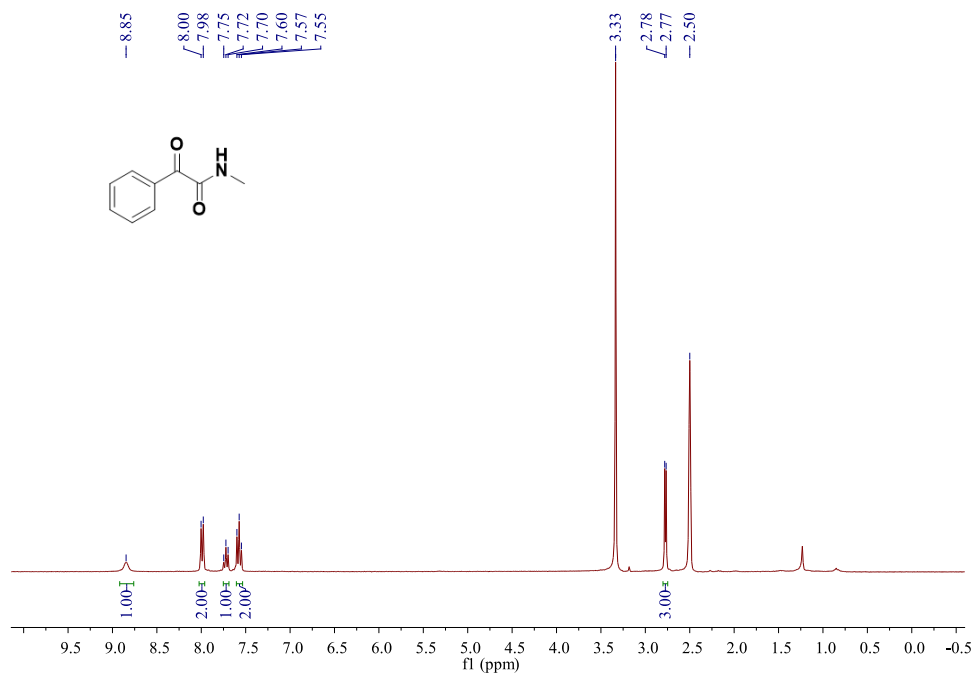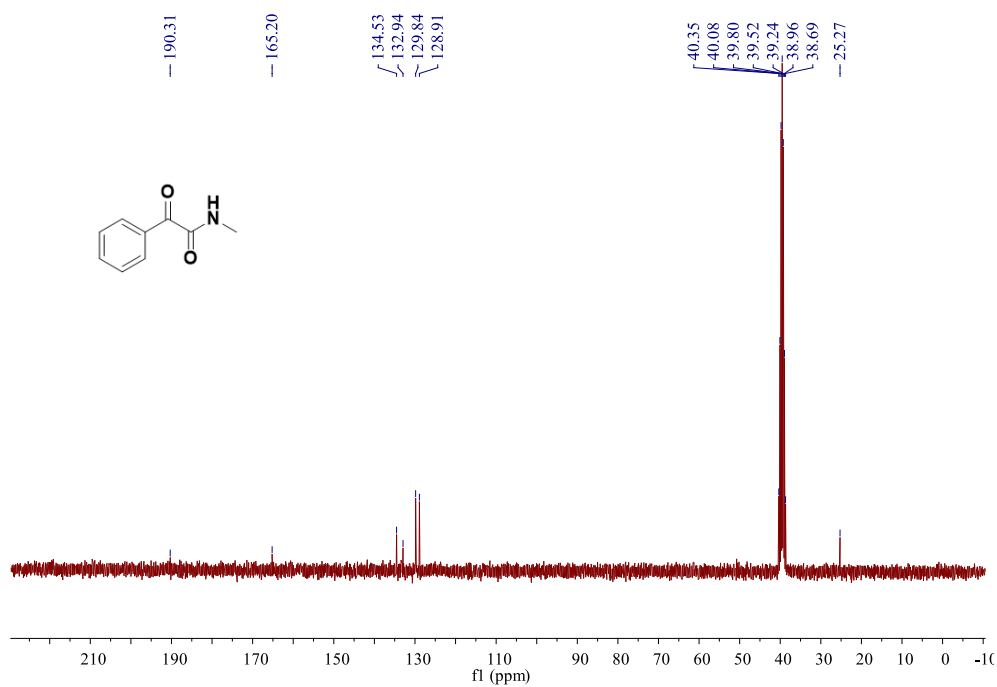

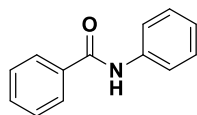

### ***N*-Phenylbenzamide (3ag)**

petroleum ether / ethyl acetate = 5:1, white solid, 47% yield (18.5 mg). mp: 162 – 163°C. <sup>1</sup>H NMR (400 MHz, DMSO-*d*<sub>6</sub>) δ 10.24 (s, 1H), 7.96 – 7.94 (m, 2H), 7.79 – 7.77 (m, 2H), 7.61 – 7.51 (m, 3H), 7.37 – 7.33 (m, 2H), 7.10 (t, *J* = 7.4 Hz, 1H). <sup>13</sup>C NMR (100 MHz, DMSO-*d*<sub>6</sub>) δ 165.54, 139.15, 134.97, 131.52, 128.58, 128.36, 127.63, 123.64, 120.34. HRMS (ESI-TOF): Anal Calcd. For. C<sub>13</sub>H<sub>11</sub>NO+Na<sup>+</sup>: 220.0733, Found: 220.0740. IR (neat, cm<sup>-1</sup>): ν 3284, 3030, 1635, 1600, 1549, 1451, 1313, 724, 691.

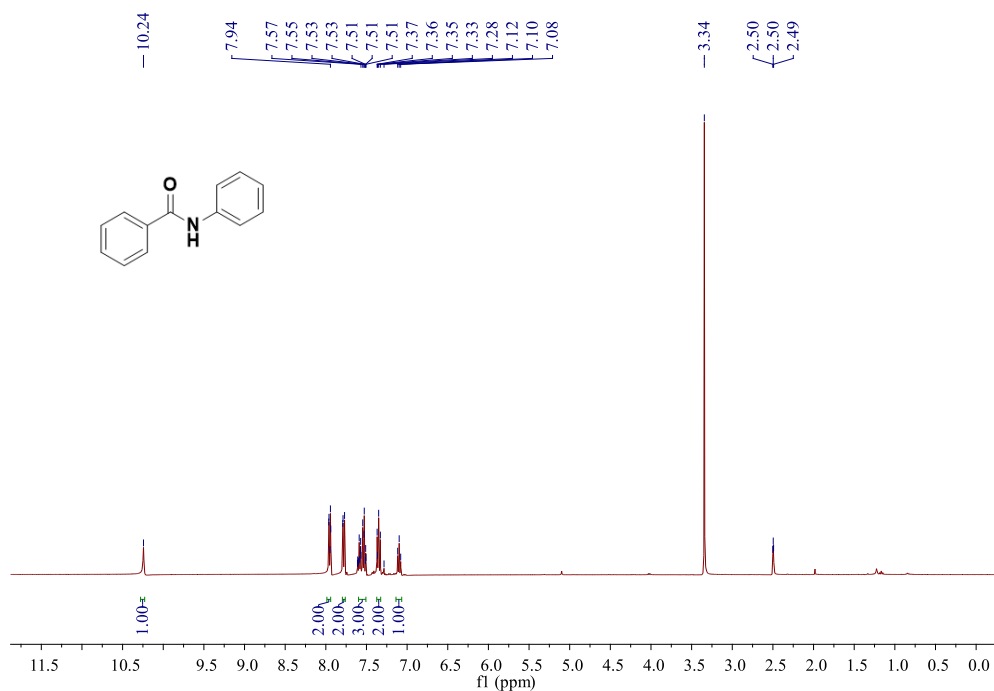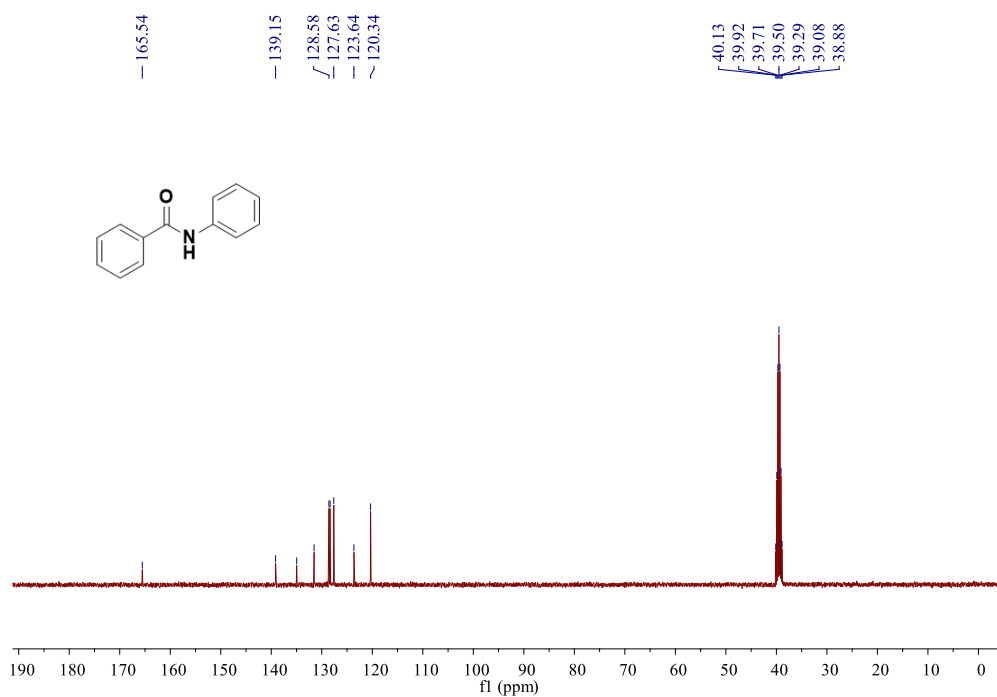

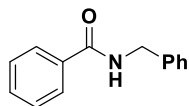

**N-benzylbenzamide (3ah)**

petroleum ether / ethyl acetate = 2:1, white solid, 52% yield (21.9 mg). mp: 99 – 100°C. <sup>1</sup>H NMR (400 MHz, DMSO-*d*<sub>6</sub>) δ 9.07 (s, 1H), 7.92 (d, *J* = 7.5 Hz, 2H), 7.55 – 7.46 (m, 3H), 7.34 – 7.30 (m, 4H), 7.26 – 7.23 (m, 1H), 4.50 (d, *J* = 6.0 Hz, 2H). <sup>13</sup>C NMR (100 MHz, DMSO-*d*<sub>6</sub>) δ 166.18, 139.68, 134.32, 131.20, 128.28, 128.24, 127.22, 127.16, 126.69, 42.59. HRMS (ESI-TOF): Anal Calcd. For. C<sub>14</sub>H<sub>13</sub>NO+Na<sup>+</sup>: 234.0889, Found: 234.0891. IR (neat, cm<sup>-1</sup>): ν 3282, 2927, 1635, 1548, 1488, 793, 691.

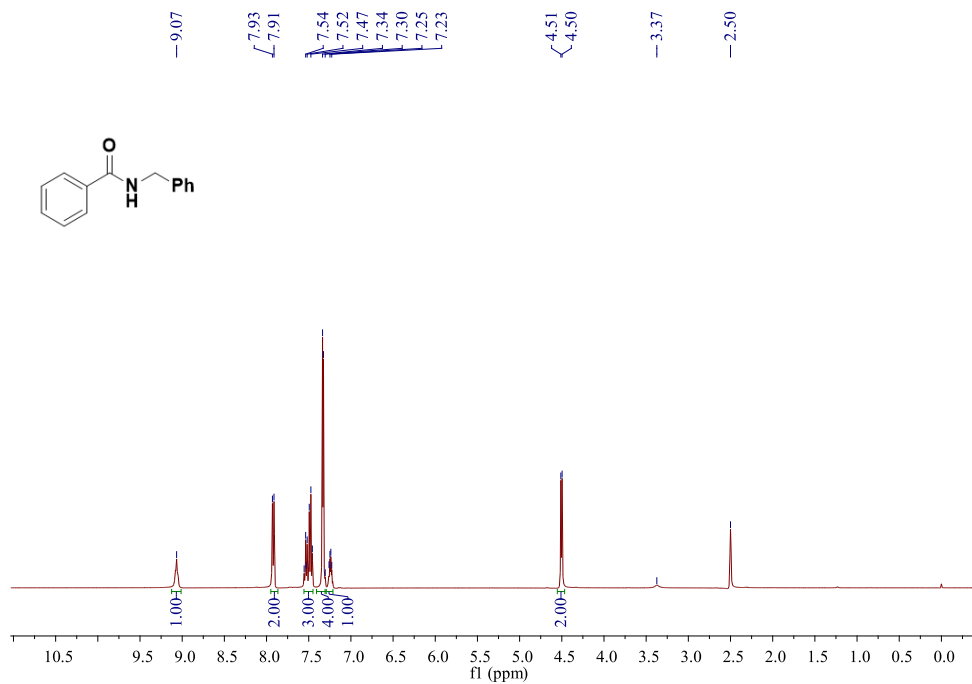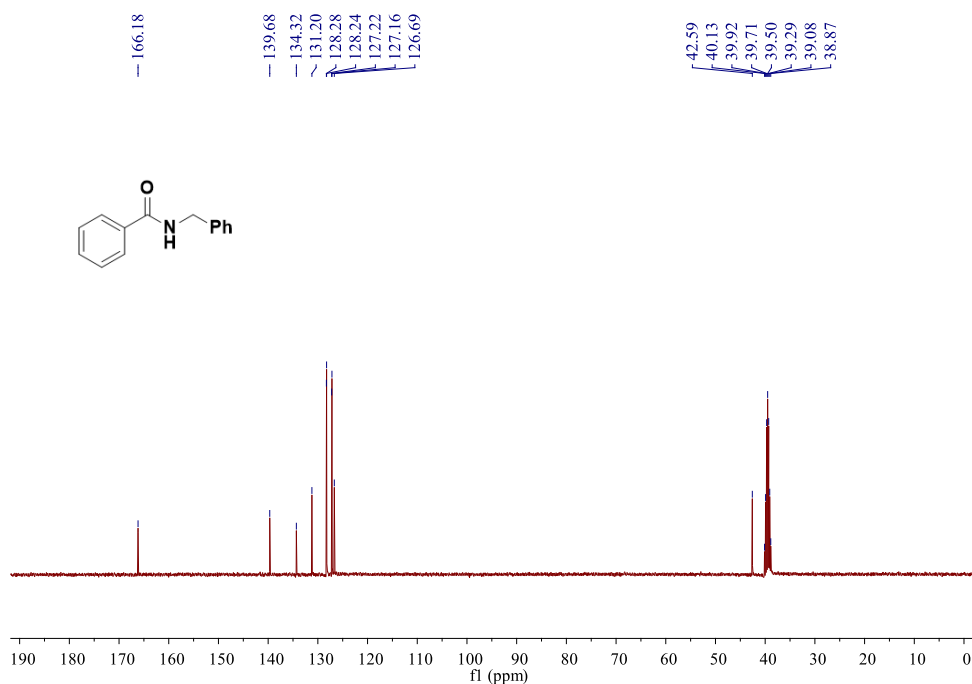

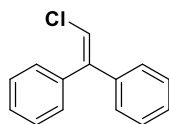

**(2-Chloroethene-1,1-diyl) dibenzene (4)**

pure petroleum ether, colorless oil.  $^1\text{H NMR}$  (400 MHz,  $\text{CDCl}_3$ )  $\delta$  7.37-7.17 (m, 10H), 6.56 (s, 1H).  $^{13}\text{C NMR}$  (100 MHz,  $\text{CDCl}_3$ )  $\delta$  143.82, 140.07, 137.53, 129.82, 128.38, 128.22, 128.16, 128.12, 128.03, 127.92, 127.67, 115.84. **HRMS** (EI-TOF): Anal Calcd. For.  $\text{C}_{14}\text{H}_{11}\text{Cl}$ : 214.0549, found: 214.0551; IR (neat,  $\text{cm}^{-1}$ ):  $\nu$  3023, 1609, 1573, 1442, 896, 770, 694.

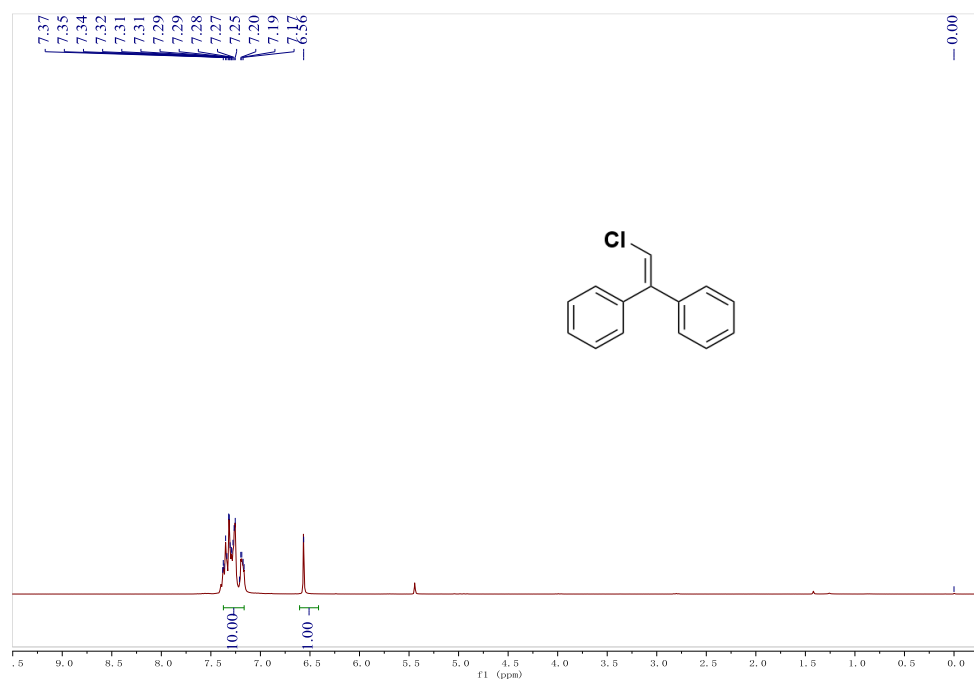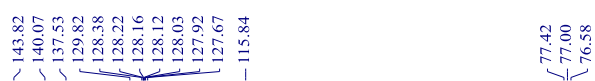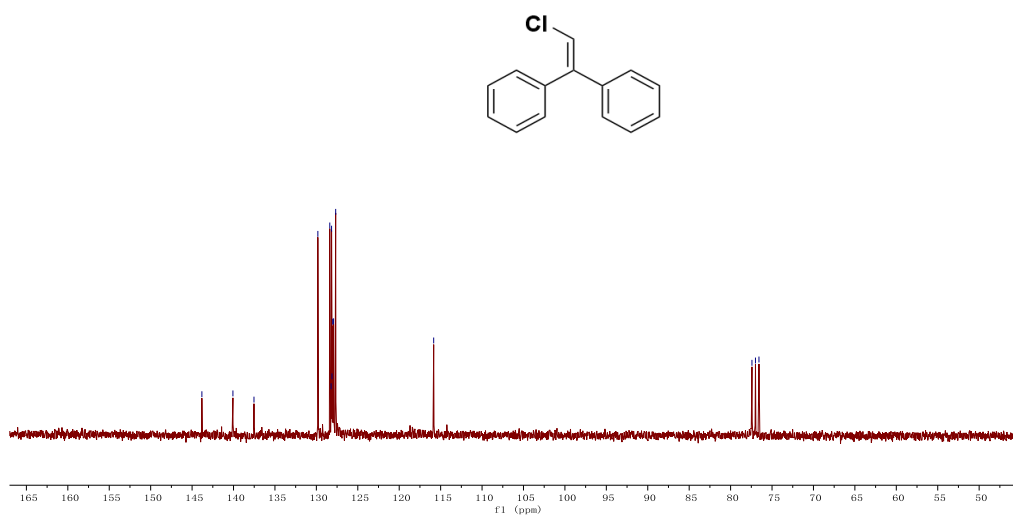

Supplement: d2qo01032a1.pdf [file d2qo01032a1.pdf]
